# Supplementary material
Source: ML conference proceedings conference paper supplement (https://openreview.net/forum?id=re0ly2Ylcu)
Supplement: supplementary_material [file alpha results.xlsx]

## Sheet: Sheet1
	alpha_results	switching point 1
switching point 2		2	3	4	5	6	7	8	9	10	11	12	13	14
	2	0.59, 0.69	0.54, 0.64	0.50, 0.59	0.47, 0.55	0.44, 0.51	0.38, 0.48	0.34, 0.43	0.30, 0.38	0.25, 0.34	0.20, 0.29	0.15, 0.24	0.11, 0.18	0.04, 0.14
	3	0.64, 0.75	0.60, 0.70	0.56, 0.65	0.52, 0.61	0.49, 0.57	0.43, 0.53	0.39, 0.48	0.35, 0.43	0.30, 0.39	0.24, 0.34	0.19, 0.29	0.15, 0.23	0.09, 0.19
	4	0.70, 0.81	0.65, 0.75	0.61, 0.70	0.58, 0.66	0.54, 0.62	0.49, 0.59	0.44, 0.53	0.40, 0.48	0.35, 0.44	0.29, 0.39	0.24, 0.34	0.20, 0.28	0.14, 0.24
	5	0.76, 0.87	0.71, 0.81	0.67, 0.76	0.63, 0.72	0.60, 0.68	0.54, 0.65	0.49, 0.59	0.45, 0.54	0.40, 0.50	0.34, 0.45	0.29, 0.39	0.25, 0.34	0.18, 0.29
	6	0.82, 0.93	0.77, 0.87	0.73, 0.82	0.69, 0.78	0.65, 0.74	0.60, 0.70	0.55, 0.64	0.51, 0.59	0.45, 0.55	0.40, 0.50	0.34, 0.44	0.30, 0.39	0.23, 0.34
	7	0.88, 0.99	0.83, 0.93	0.78, 0.88	0.74, 0.84	0.71, 0.80	0.65, 0.76	0.60, 0.70	0.56, 0.65	0.51, 0.61	0.45, 0.55	0.39, 0.50	0.35, 0.44	0.28, 0.40
	8	0.94, 1.05	0.89, 0.99	0.84, 0.94	0.80, 0.89	0.77, 0.85	0.71, 0.82	0.66, 0.75	0.62, 0.70	0.56, 0.66	0.51, 0.60	0.45, 0.55	0.40, 0.49	0.34, 0.44
	9	0.99, 1.09	0.94, 1.03	0.90, 0.98	0.86, 0.93	0.82, 0.89	0.76, 0.86	0.71, 0.80	0.67, 0.74	0.61, 0.70	0.56, 0.65	0.50, 0.59	0.45, 0.53	0.39, 0.48
	10	0.75, 1.89	0.75, 1.89	0.75, 1.89	0.75, 1.89	0.87, 0.96	0.75, 1.89	0.75, 1.89	0.71, 1.89	0.65, 1.89	0.59, 1.89	0.54, 1.89	0.49, 1.89	0.42, 1.89
	11	0.75, 1.89	0.75, 1.89	0.75, 1.89	0.75, 1.89	0.93, 1.00	0.75, 1.89	0.75, 1.89	0.75, 1.89	0.71, 1.89	0.65, 1.89	0.59, 1.89	0.55, 1.89	0.48, 1.89
	12	1.15, 1.27	1.10, 1.21	1.06, 1.15	1.01, 1.11	0.98, 1.07	0.91, 1.03	0.86, 0.96	0.81, 0.91	0.76, 0.86	0.70, 0.80	0.64, 0.74	0.59, 0.68	0.52, 0.63
	13	1.22, 1.34	1.16, 1.27	1.11, 1.22	1.07, 1.17	1.04, 1.13	0.97, 1.09	0.92, 1.02	0.87, 0.97	0.81, 0.92	0.75, 0.86	0.69, 0.80	0.64, 0.74	0.57, 0.69
	14	1.28, 1.39	1.23, 1.33	1.18, 1.27	1.14, 1.22	1.10, 1.18	1.03, 1.14	0.98, 1.07	0.93, 1.02	0.87, 0.97	0.81, 0.91	0.75, 0.84	0.70, 0.78	0.62, 0.73
