# Supplementary material
Source: ML conference proceedings conference paper supplement (https://openreview.net/forum?id=re0ly2Ylcu)
Supplement: supplementary_material [file attachment]

## Sheet: baseline gpt
Feature	S1	S2	S3	S1-corrected	S2-corrected	S3-corrected	sigma range	alpha range	sigma lower bound	sigma upper bound	alpha lower bound	alpha upper bound	lambda upper bound	lambda lower bound	sigma	alpha	lambda
7	9	5	1	10	6	2	0.31, 0.40	0.87, 0.96	0.31	0.40	0.87	0.96	1.4628	0.269588	0.355	0.915	0.866195
9	9	6	1	10	7	2	0.34, 1.00	0.75, 1.89	0.34	1.00	0.75	1.89	1.34745	0.196954	0.67	1.32	0.772204
12	9	3	1	10	4	2	0.22, 1.00	0.75, 1.89	0.22	1.00	0.75	1.89	1.3675	0.20942	0.61	1.32	0.788462
13	9	3	1	10	4	2	0.22, 1.00	0.75, 1.89	0.22	1.00	0.75	1.89	1.3675	0.20942	0.61	1.32	0.788462
23	9	6	1	10	7	2	0.34, 1.00	0.75, 1.89	0.34	1.00	0.75	1.89	1.34745	0.196954	0.67	1.32	0.772204
24	7	4	1	8	5	2	0.17, 0.26	0.80, 0.89	0.17	0.26	0.80	0.89	1.52247	0.307961	0.215	0.845	0.915217
31	8	6	1	9	7	2	0.31, 0.39	0.76, 0.86	0.31	0.39	0.76	0.86	1.46484	0.27089	0.35	0.81	0.867865
39	10	7	1	11	8	2	0.46, 1.00	0.75, 1.89	0.46	1.00	0.75	1.89	1.32826	0.185092	0.73	1.32	0.756676
60	9	6	1	10	7	2	0.34, 1.00	0.75, 1.89	0.34	1.00	0.75	1.89	1.34745	0.196954	0.67	1.32	0.772204
68	10	3	1	11	4	2	0.29, 1.00	0.75, 1.89	0.29	1.00	0.75	1.89	1.3557	0.202074	0.645	1.32	0.778888
91	9	5	1	10	6	2	0.31, 0.40	0.87, 0.96	0.31	0.40	0.87	0.96	1.4628	0.269588	0.355	0.915	0.866195
93	10	7	1	11	8	2	0.46, 1.00	0.75, 1.89	0.46	1.00	0.75	1.89	1.32826	0.185092	0.73	1.32	0.756676
97	9	3	1	10	4	2	0.22, 1.00	0.75, 1.89	0.22	1.00	0.75	1.89	1.3675	0.20942	0.61	1.32	0.788462
99	10	13	1	11	14	2	0.71, 1.00	0.48, 1.89	0.71	1.00	0.48	1.89	1.29094	0.162228	0.855	1.185	0.726583
103	8	7	1	9	8	2	0.36, 0.44	0.71, 0.80	0.36	0.44	0.71	0.80	1.44476	0.258085	0.4	0.755	0.851421
107	10	0	1	11	1	2	#N/A	#N/A	#N/A	#N/A	#N/A	#N/A	#N/A	#N/A	#N/A	#N/A	#N/A
110	10	7	1	11	8	2	0.46, 1.00	0.75, 1.89	0.46	1.00	0.75	1.89	1.32826	0.185092	0.73	1.32	0.756676
117	9	5	1	10	6	2	0.31, 0.40	0.87, 0.96	0.31	0.40	0.87	0.96	1.4628	0.269588	0.355	0.915	0.866195
122	10	5	1	11	6	2	0.37, 0.44	0.93, 1.00	0.37	0.44	0.93	1.00	1.44279	0.256831	0.405	0.965	0.849808
126	9	5	1	10	6	2	0.31, 0.40	0.87, 0.96	0.31	0.40	0.87	0.96	1.4628	0.269588	0.355	0.915	0.866195
132	9	6	1	10	7	2	0.34, 1.00	0.75, 1.89	0.34	1.00	0.75	1.89	1.34745	0.196954	0.67	1.32	0.772204
137	9	7	1	10	8	2	0.40, 1.00	0.75, 1.89	0.40	1.00	0.75	1.89	1.33775	0.190949	0.7	1.32	0.76435
144	9	7	1	10	8	2	0.40, 1.00	0.75, 1.89	0.40	1.00	0.75	1.89	1.33775	0.190949	0.7	1.32	0.76435
150	9	7	1	10	8	2	0.40, 1.00	0.75, 1.89	0.40	1.00	0.75	1.89	1.33775	0.190949	0.7	1.32	0.76435
151	7	3	1	8	4	2	0.12, 0.22	0.84, 0.94	0.12	0.22	0.84	0.94	1.54282	0.321157	0.17	0.89	0.931987
157	9	5	1	10	6	2	0.31, 0.40	0.87, 0.96	0.31	0.40	0.87	0.96	1.4628	0.269588	0.355	0.915	0.866195
159	9	7	1	10	8	2	0.40, 1.00	0.75, 1.89	0.40	1.00	0.75	1.89	1.33775	0.190949	0.7	1.32	0.76435
162	9	6	1	10	7	2	0.34, 1.00	0.75, 1.89	0.34	1.00	0.75	1.89	1.34745	0.196954	0.67	1.32	0.772204
166	9	7	1	10	8	2	0.40, 1.00	0.75, 1.89	0.40	1.00	0.75	1.89	1.33775	0.190949	0.7	1.32	0.76435
179	10	7	1	11	8	2	0.46, 1.00	0.75, 1.89	0.46	1.00	0.75	1.89	1.32826	0.185092	0.73	1.32	0.756676
183	10	6	1	11	7	2	0.40, 1.00	0.75, 1.89	0.40	1.00	0.75	1.89	1.33775	0.190949	0.7	1.32	0.76435
186	9	6	1	10	7	2	0.34, 1.00	0.75, 1.89	0.34	1.00	0.75	1.89	1.34745	0.196954	0.67	1.32	0.772204
188	9	6	1	10	7	2	0.34, 1.00	0.75, 1.89	0.34	1.00	0.75	1.89	1.34745	0.196954	0.67	1.32	0.772204
191	9	7	1	10	8	2	0.40, 1.00	0.75, 1.89	0.40	1.00	0.75	1.89	1.33775	0.190949	0.7	1.32	0.76435
196	8	5	1	9	6	2	0.27, 0.34	0.82, 0.89	0.27	0.34	0.82	0.89	1.48349	0.282836	0.305	0.855	0.883164
209	7	0	1	8	1	2	#N/A	#N/A	#N/A	#N/A	#N/A	#N/A	#N/A	#N/A	#N/A	#N/A	#N/A
212	10	7	1	11	8	2	0.46, 1.00	0.75, 1.89	0.46	1.00	0.75	1.89	1.32826	0.185092	0.73	1.32	0.756676
215	9	5	1	10	6	2	0.31, 0.40	0.87, 0.96	0.31	0.40	0.87	0.96	1.4628	0.269588	0.355	0.915	0.866195
216	10	6	1	11	7	2	0.40, 1.00	0.75, 1.89	0.40	1.00	0.75	1.89	1.33775	0.190949	0.7	1.32	0.76435
224	9	5	1	10	6	2	0.31, 0.40	0.87, 0.96	0.31	0.40	0.87	0.96	1.4628	0.269588	0.355	0.915	0.866195
236	10	0	1	11	1	2	#N/A	#N/A	#N/A	#N/A	#N/A	#N/A	#N/A	#N/A	#N/A	#N/A	#N/A
239	10	6	1	11	7	2	0.40, 1.00	0.75, 1.89	0.40	1.00	0.75	1.89	1.33775	0.190949	0.7	1.32	0.76435
252	10	6	1	11	7	2	0.40, 1.00	0.75, 1.89	0.40	1.00	0.75	1.89	1.33775	0.190949	0.7	1.32	0.76435
260	9	5	1	10	6	2	0.31, 0.40	0.87, 0.96	0.31	0.40	0.87	0.96	1.4628	0.269588	0.355	0.915	0.866195
264	10	6	1	11	7	2	0.40, 1.00	0.75, 1.89	0.40	1.00	0.75	1.89	1.33775	0.190949	0.7	1.32	0.76435
271	9	5	1	10	6	2	0.31, 0.40	0.87, 0.96	0.31	0.40	0.87	0.96	1.4628	0.269588	0.355	0.915	0.866195
274	7	6	1	8	7	2	0.25, 0.36	0.71, 0.82	0.25	0.36	0.71	0.82	1.48349	0.282836	0.305	0.765	0.883164
277	9	7	1	10	8	2	0.40, 1.00	0.75, 1.89	0.40	1.00	0.75	1.89	1.33775	0.190949	0.7	1.32	0.76435
282	9	4	1	10	5	2	0.27, 1.00	0.75, 1.89	0.27	1.00	0.75	1.89	1.35904	0.204152	0.635	1.32	0.781598
288	7	4	1	8	5	2	0.17, 0.26	0.80, 0.89	0.17	0.26	0.80	0.89	1.52247	0.307961	0.215	0.845	0.915217
294	7	4	1	8	5	2	0.17, 0.26	0.80, 0.89	0.17	0.26	0.80	0.89	1.52247	0.307961	0.215	0.845	0.915217
1	9	6	3	10	7	4	0.34, 1.00	0.75, 1.89	0.34	1.00	0.75	1.89	1.87129	1.34745	0.67	1.32	1.60937
2	9	11	3	10	12	4	0.59, 1.00	0.54, 1.89	0.59	1.00	0.54	1.89	1.94129	1.30841	0.795	1.215	1.62485
3	9	6	3	10	7	4	0.34, 1.00	0.75, 1.89	0.34	1.00	0.75	1.89	1.87129	1.34745	0.67	1.32	1.60937
4	7	0	3	8	1	4	#N/A	#N/A	#N/A	#N/A	#N/A	#N/A	#N/A	#N/A	#N/A	#N/A	#N/A
5	10	7	3	11	8	4	0.46, 1.00	0.75, 1.89	0.46	1.00	0.75	1.89	1.90193	1.32826	0.73	1.32	1.6151
6	8	4	3	9	5	4	0.23, 0.30	0.86, 0.93	0.23	0.30	0.86	0.93	1.7828	1.50054	0.265	0.895	1.64167
8	9	8	3	10	9	4	0.45, 1.00	0.71, 1.89	0.45	1.00	0.71	1.89	1.89917	1.32983	0.725	1.3	1.6145
10	10	7	3	11	8	4	0.46, 1.00	0.75, 1.89	0.46	1.00	0.75	1.89	1.90193	1.32826	0.73	1.32	1.6151
11	9	6	3	10	7	4	0.34, 1.00	0.75, 1.89	0.34	1.00	0.75	1.89	1.87129	1.34745	0.67	1.32	1.60937
14	7	0	3	8	1	4	#N/A	#N/A	#N/A	#N/A	#N/A	#N/A	#N/A	#N/A	#N/A	#N/A	#N/A
15	10	7	3	11	8	4	0.46, 1.00	0.75, 1.89	0.46	1.00	0.75	1.89	1.90193	1.32826	0.73	1.32	1.6151
16	8	5	3	9	6	4	0.27, 0.34	0.82, 0.89	0.27	0.34	0.82	0.89	1.78364	1.48349	0.305	0.855	1.63357
17	10	6	3	11	7	4	0.40, 1.00	0.75, 1.89	0.40	1.00	0.75	1.89	1.88595	1.33775	0.7	1.32	1.61185
18	7	6	3	8	7	4	0.25, 0.36	0.71, 0.82	0.25	0.36	0.71	0.82	1.78364	1.48349	0.305	0.765	1.63357
19	7	5	3	8	6	4	0.22, 0.30	0.77, 0.85	0.22	0.30	0.77	0.85	1.7828	1.5027	0.26	0.81	1.64275
20	9	6	3	10	7	4	0.34, 1.00	0.75, 1.89	0.34	1.00	0.75	1.89	1.87129	1.34745	0.67	1.32	1.60937
21	9	6	3	10	7	4	0.34, 1.00	0.75, 1.89	0.34	1.00	0.75	1.89	1.87129	1.34745	0.67	1.32	1.60937
22	9	7	3	10	8	4	0.40, 1.00	0.75, 1.89	0.40	1.00	0.75	1.89	1.88595	1.33775	0.7	1.32	1.61185
25	7	0	3	8	1	4	#N/A	#N/A	#N/A	#N/A	#N/A	#N/A	#N/A	#N/A	#N/A	#N/A	#N/A
26	9	7	3	10	8	4	0.40, 1.00	0.75, 1.89	0.40	1.00	0.75	1.89	1.88595	1.33775	0.7	1.32	1.61185
27	9	7	3	10	8	4	0.40, 1.00	0.75, 1.89	0.40	1.00	0.75	1.89	1.88595	1.33775	0.7	1.32	1.61185
28	9	7	3	10	8	4	0.40, 1.00	0.75, 1.89	0.40	1.00	0.75	1.89	1.88595	1.33775	0.7	1.32	1.61185
29	9	6	3	10	7	4	0.34, 1.00	0.75, 1.89	0.34	1.00	0.75	1.89	1.87129	1.34745	0.67	1.32	1.60937
30	9	6	3	10	7	4	0.34, 1.00	0.75, 1.89	0.34	1.00	0.75	1.89	1.87129	1.34745	0.67	1.32	1.60937
32	9	0	3	10	1	4	#N/A	#N/A	#N/A	#N/A	#N/A	#N/A	#N/A	#N/A	#N/A	#N/A	#N/A
33	8	5	3	9	6	4	0.27, 0.34	0.82, 0.89	0.27	0.34	0.82	0.89	1.78364	1.48349	0.305	0.855	1.63357
34	10	6	3	11	7	4	0.40, 1.00	0.75, 1.89	0.40	1.00	0.75	1.89	1.88595	1.33775	0.7	1.32	1.61185
35	10	7	3	11	8	4	0.46, 1.00	0.75, 1.89	0.46	1.00	0.75	1.89	1.90193	1.32826	0.73	1.32	1.6151
36	10	7	3	11	8	4	0.46, 1.00	0.75, 1.89	0.46	1.00	0.75	1.89	1.90193	1.32826	0.73	1.32	1.6151
37	7	0	3	8	1	4	#N/A	#N/A	#N/A	#N/A	#N/A	#N/A	#N/A	#N/A	#N/A	#N/A	#N/A
38	9	7	3	10	8	4	0.40, 1.00	0.75, 1.89	0.40	1.00	0.75	1.89	1.88595	1.33775	0.7	1.32	1.61185
40	9	6	3	10	7	4	0.34, 1.00	0.75, 1.89	0.34	1.00	0.75	1.89	1.87129	1.34745	0.67	1.32	1.60937
41	10	7	3	11	8	4	0.46, 1.00	0.75, 1.89	0.46	1.00	0.75	1.89	1.90193	1.32826	0.73	1.32	1.6151
42	10	7	3	11	8	4	0.46, 1.00	0.75, 1.89	0.46	1.00	0.75	1.89	1.90193	1.32826	0.73	1.32	1.6151
43	8	6	3	9	7	4	0.31, 0.39	0.76, 0.86	0.31	0.39	0.76	0.86	1.78644	1.46484	0.35	0.81	1.62564
44	10	7	3	11	8	4	0.46, 1.00	0.75, 1.89	0.46	1.00	0.75	1.89	1.90193	1.32826	0.73	1.32	1.6151
45	9	7	3	10	8	4	0.40, 1.00	0.75, 1.89	0.40	1.00	0.75	1.89	1.88595	1.33775	0.7	1.32	1.61185
46	9	7	3	10	8	4	0.40, 1.00	0.75, 1.89	0.40	1.00	0.75	1.89	1.88595	1.33775	0.7	1.32	1.61185
47	10	7	3	11	8	4	0.46, 1.00	0.75, 1.89	0.46	1.00	0.75	1.89	1.90193	1.32826	0.73	1.32	1.6151
48	9	6	3	10	7	4	0.34, 1.00	0.75, 1.89	0.34	1.00	0.75	1.89	1.87129	1.34745	0.67	1.32	1.60937
49	9	7	3	10	8	4	0.40, 1.00	0.75, 1.89	0.40	1.00	0.75	1.89	1.88595	1.33775	0.7	1.32	1.61185
50	10	7	3	11	8	4	0.46, 1.00	0.75, 1.89	0.46	1.00	0.75	1.89	1.90193	1.32826	0.73	1.32	1.6151
51	8	10	3	9	11	4	0.50, 0.58	0.56, 0.65	0.50	0.58	0.56	0.65	1.82195	1.39201	0.54	0.605	1.60698
52	9	7	3	10	8	4	0.40, 1.00	0.75, 1.89	0.40	1.00	0.75	1.89	1.88595	1.33775	0.7	1.32	1.61185
53	8	7	3	9	8	4	0.36, 0.44	0.71, 0.80	0.36	0.44	0.71	0.80	1.79195	1.44476	0.4	0.755	1.61836
54	7	4	3	8	5	4	0.17, 0.26	0.80, 0.89	0.17	0.26	0.80	0.89	1.78383	1.52247	0.215	0.845	1.65315
55	9	6	3	10	7	4	0.34, 1.00	0.75, 1.89	0.34	1.00	0.75	1.89	1.87129	1.34745	0.67	1.32	1.60937
56	9	7	3	10	8	4	0.40, 1.00	0.75, 1.89	0.40	1.00	0.75	1.89	1.88595	1.33775	0.7	1.32	1.61185
57	8	5	3	9	6	4	0.27, 0.34	0.82, 0.89	0.27	0.34	0.82	0.89	1.78364	1.48349	0.305	0.855	1.63357
58	9	6	3	10	7	4	0.34, 1.00	0.75, 1.89	0.34	1.00	0.75	1.89	1.87129	1.34745	0.67	1.32	1.60937
59	8	7	3	9	8	4	0.36, 0.44	0.71, 0.80	0.36	0.44	0.71	0.80	1.79195	1.44476	0.4	0.755	1.61836
61	10	7	3	11	8	4	0.46, 1.00	0.75, 1.89	0.46	1.00	0.75	1.89	1.90193	1.32826	0.73	1.32	1.6151
62	7	0	3	8	1	4	#N/A	#N/A	#N/A	#N/A	#N/A	#N/A	#N/A	#N/A	#N/A	#N/A	#N/A
63	9	6	3	10	7	4	0.34, 1.00	0.75, 1.89	0.34	1.00	0.75	1.89	1.87129	1.34745	0.67	1.32	1.60937
64	10	6	3	11	7	4	0.40, 1.00	0.75, 1.89	0.40	1.00	0.75	1.89	1.88595	1.33775	0.7	1.32	1.61185
65	9	6	3	10	7	4	0.34, 1.00	0.75, 1.89	0.34	1.00	0.75	1.89	1.87129	1.34745	0.67	1.32	1.60937
66	9	7	3	10	8	4	0.40, 1.00	0.75, 1.89	0.40	1.00	0.75	1.89	1.88595	1.33775	0.7	1.32	1.61185
67	9	4	3	10	5	4	0.27, 1.00	0.75, 1.89	0.27	1.00	0.75	1.89	1.8558	1.35904	0.635	1.32	1.60742
69	9	6	3	10	7	4	0.34, 1.00	0.75, 1.89	0.34	1.00	0.75	1.89	1.87129	1.34745	0.67	1.32	1.60937
70	10	7	3	11	8	4	0.46, 1.00	0.75, 1.89	0.46	1.00	0.75	1.89	1.90193	1.32826	0.73	1.32	1.6151
71	8	6	3	9	7	4	0.31, 0.39	0.76, 0.86	0.31	0.39	0.76	0.86	1.78644	1.46484	0.35	0.81	1.62564
72	9	6	3	10	7	4	0.34, 1.00	0.75, 1.89	0.34	1.00	0.75	1.89	1.87129	1.34745	0.67	1.32	1.60937
73	10	7	3	11	8	4	0.46, 1.00	0.75, 1.89	0.46	1.00	0.75	1.89	1.90193	1.32826	0.73	1.32	1.6151
74	7	0	3	8	1	4	#N/A	#N/A	#N/A	#N/A	#N/A	#N/A	#N/A	#N/A	#N/A	#N/A	#N/A
76	10	7	3	11	8	4	0.46, 1.00	0.75, 1.89	0.46	1.00	0.75	1.89	1.90193	1.32826	0.73	1.32	1.6151
77	9	6	3	10	7	4	0.34, 1.00	0.75, 1.89	0.34	1.00	0.75	1.89	1.87129	1.34745	0.67	1.32	1.60937
78	9	6	3	10	7	4	0.34, 1.00	0.75, 1.89	0.34	1.00	0.75	1.89	1.87129	1.34745	0.67	1.32	1.60937
79	9	7	3	10	8	4	0.40, 1.00	0.75, 1.89	0.40	1.00	0.75	1.89	1.88595	1.33775	0.7	1.32	1.61185
80	8	7	3	9	8	4	0.36, 0.44	0.71, 0.80	0.36	0.44	0.71	0.80	1.79195	1.44476	0.4	0.755	1.61836
81	9	6	3	10	7	4	0.34, 1.00	0.75, 1.89	0.34	1.00	0.75	1.89	1.87129	1.34745	0.67	1.32	1.60937
82	6	7	3	7	8	4	0.26, 0.36	0.60, 0.70	0.26	0.36	0.60	0.70	1.78385	1.48139	0.31	0.65	1.63262
83	8	0	3	9	1	4	#N/A	#N/A	#N/A	#N/A	#N/A	#N/A	#N/A	#N/A	#N/A	#N/A	#N/A
84	9	6	3	10	7	4	0.34, 1.00	0.75, 1.89	0.34	1.00	0.75	1.89	1.87129	1.34745	0.67	1.32	1.60937
85	9	7	3	10	8	4	0.40, 1.00	0.75, 1.89	0.40	1.00	0.75	1.89	1.88595	1.33775	0.7	1.32	1.61185
86	9	6	3	10	7	4	0.34, 1.00	0.75, 1.89	0.34	1.00	0.75	1.89	1.87129	1.34745	0.67	1.32	1.60937
87	10	7	3	11	8	4	0.46, 1.00	0.75, 1.89	0.46	1.00	0.75	1.89	1.90193	1.32826	0.73	1.32	1.6151
88	7	0	3	8	1	4	#N/A	#N/A	#N/A	#N/A	#N/A	#N/A	#N/A	#N/A	#N/A	#N/A	#N/A
89	9	5	3	10	6	4	0.31, 0.40	0.87, 0.96	0.31	0.40	0.87	0.96	1.78688	1.4628	0.355	0.915	1.62484
90	10	7	3	11	8	4	0.46, 1.00	0.75, 1.89	0.46	1.00	0.75	1.89	1.90193	1.32826	0.73	1.32	1.6151
92	9	3	3	10	4	4	0.22, 1.00	0.75, 1.89	0.22	1.00	0.75	1.89	1.84575	1.3675	0.61	1.32	1.60663
94	9	7	3	10	8	4	0.40, 1.00	0.75, 1.89	0.40	1.00	0.75	1.89	1.88595	1.33775	0.7	1.32	1.61185
95	8	7	3	9	8	4	0.36, 0.44	0.71, 0.80	0.36	0.44	0.71	0.80	1.79195	1.44476	0.4	0.755	1.61836
96	9	6	3	10	7	4	0.34, 1.00	0.75, 1.89	0.34	1.00	0.75	1.89	1.87129	1.34745	0.67	1.32	1.60937
98	8	7	3	9	8	4	0.36, 0.44	0.71, 0.80	0.36	0.44	0.71	0.80	1.79195	1.44476	0.4	0.755	1.61836
100	9	7	3	10	8	4	0.40, 1.00	0.75, 1.89	0.40	1.00	0.75	1.89	1.88595	1.33775	0.7	1.32	1.61185
101	10	6	3	11	7	4	0.40, 1.00	0.75, 1.89	0.40	1.00	0.75	1.89	1.88595	1.33775	0.7	1.32	1.61185
102	10	7	3	11	8	4	0.46, 1.00	0.75, 1.89	0.46	1.00	0.75	1.89	1.90193	1.32826	0.73	1.32	1.6151
104	9	6	3	10	7	4	0.34, 1.00	0.75, 1.89	0.34	1.00	0.75	1.89	1.87129	1.34745	0.67	1.32	1.60937
105	9	6	3	10	7	4	0.34, 1.00	0.75, 1.89	0.34	1.00	0.75	1.89	1.87129	1.34745	0.67	1.32	1.60937
106	9	6	3	10	7	4	0.34, 1.00	0.75, 1.89	0.34	1.00	0.75	1.89	1.87129	1.34745	0.67	1.32	1.60937
108	7	0	3	8	1	4	#N/A	#N/A	#N/A	#N/A	#N/A	#N/A	#N/A	#N/A	#N/A	#N/A	#N/A
109	9	6	3	10	7	4	0.34, 1.00	0.75, 1.89	0.34	1.00	0.75	1.89	1.87129	1.34745	0.67	1.32	1.60937
111	10	6	3	11	7	4	0.40, 1.00	0.75, 1.89	0.40	1.00	0.75	1.89	1.88595	1.33775	0.7	1.32	1.61185
112	9	6	3	10	7	4	0.34, 1.00	0.75, 1.89	0.34	1.00	0.75	1.89	1.87129	1.34745	0.67	1.32	1.60937
113	9	5	3	10	6	4	0.31, 0.40	0.87, 0.96	0.31	0.40	0.87	0.96	1.78688	1.4628	0.355	0.915	1.62484
114	10	7	3	11	8	4	0.46, 1.00	0.75, 1.89	0.46	1.00	0.75	1.89	1.90193	1.32826	0.73	1.32	1.6151
115	7	0	3	8	1	4	#N/A	#N/A	#N/A	#N/A	#N/A	#N/A	#N/A	#N/A	#N/A	#N/A	#N/A
116	8	7	3	9	8	4	0.36, 0.44	0.71, 0.80	0.36	0.44	0.71	0.80	1.79195	1.44476	0.4	0.755	1.61836
118	8	7	3	9	8	4	0.36, 0.44	0.71, 0.80	0.36	0.44	0.71	0.80	1.79195	1.44476	0.4	0.755	1.61836
119	9	5	3	10	6	4	0.31, 0.40	0.87, 0.96	0.31	0.40	0.87	0.96	1.78688	1.4628	0.355	0.915	1.62484
120	9	4	3	10	5	4	0.27, 1.00	0.75, 1.89	0.27	1.00	0.75	1.89	1.8558	1.35904	0.635	1.32	1.60742
121	7	5	3	8	6	4	0.22, 0.30	0.77, 0.85	0.22	0.30	0.77	0.85	1.7828	1.5027	0.26	0.81	1.64275
123	10	7	3	11	8	4	0.46, 1.00	0.75, 1.89	0.46	1.00	0.75	1.89	1.90193	1.32826	0.73	1.32	1.6151
124	9	6	3	10	7	4	0.34, 1.00	0.75, 1.89	0.34	1.00	0.75	1.89	1.87129	1.34745	0.67	1.32	1.60937
125	10	7	3	11	8	4	0.46, 1.00	0.75, 1.89	0.46	1.00	0.75	1.89	1.90193	1.32826	0.73	1.32	1.6151
127	10	5	3	11	6	4	0.37, 0.44	0.93, 1.00	0.37	0.44	0.93	1.00	1.79265	1.44279	0.405	0.965	1.61772
128	9	7	3	10	8	4	0.40, 1.00	0.75, 1.89	0.40	1.00	0.75	1.89	1.88595	1.33775	0.7	1.32	1.61185
129	8	0	3	9	1	4	#N/A	#N/A	#N/A	#N/A	#N/A	#N/A	#N/A	#N/A	#N/A	#N/A	#N/A
130	10	7	3	11	8	4	0.46, 1.00	0.75, 1.89	0.46	1.00	0.75	1.89	1.90193	1.32826	0.73	1.32	1.6151
131	7	9	3	8	10	4	0.41, 0.50	0.56, 0.66	0.41	0.50	0.56	0.66	1.80109	1.42343	0.455	0.61	1.61226
133	10	7	3	11	8	4	0.46, 1.00	0.75, 1.89	0.46	1.00	0.75	1.89	1.90193	1.32826	0.73	1.32	1.6151
134	10	7	3	11	8	4	0.46, 1.00	0.75, 1.89	0.46	1.00	0.75	1.89	1.90193	1.32826	0.73	1.32	1.6151
135	9	7	3	10	8	4	0.40, 1.00	0.75, 1.89	0.40	1.00	0.75	1.89	1.88595	1.33775	0.7	1.32	1.61185
136	9	7	3	10	8	4	0.40, 1.00	0.75, 1.89	0.40	1.00	0.75	1.89	1.88595	1.33775	0.7	1.32	1.61185
138	9	6	3	10	7	4	0.34, 1.00	0.75, 1.89	0.34	1.00	0.75	1.89	1.87129	1.34745	0.67	1.32	1.60937
139	7	0	3	8	1	4	#N/A	#N/A	#N/A	#N/A	#N/A	#N/A	#N/A	#N/A	#N/A	#N/A	#N/A
140	10	7	3	11	8	4	0.46, 1.00	0.75, 1.89	0.46	1.00	0.75	1.89	1.90193	1.32826	0.73	1.32	1.6151
141	9	7	3	10	8	4	0.40, 1.00	0.75, 1.89	0.40	1.00	0.75	1.89	1.88595	1.33775	0.7	1.32	1.61185
142	10	7	3	11	8	4	0.46, 1.00	0.75, 1.89	0.46	1.00	0.75	1.89	1.90193	1.32826	0.73	1.32	1.6151
143	10	6	3	11	7	4	0.40, 1.00	0.75, 1.89	0.40	1.00	0.75	1.89	1.88595	1.33775	0.7	1.32	1.61185
145	9	6	3	10	7	4	0.34, 1.00	0.75, 1.89	0.34	1.00	0.75	1.89	1.87129	1.34745	0.67	1.32	1.60937
146	8	5	3	9	6	4	0.27, 0.34	0.82, 0.89	0.27	0.34	0.82	0.89	1.78364	1.48349	0.305	0.855	1.63357
147	8	6	3	9	7	4	0.31, 0.39	0.76, 0.86	0.31	0.39	0.76	0.86	1.78644	1.46484	0.35	0.81	1.62564
148	8	5	3	9	6	4	0.27, 0.34	0.82, 0.89	0.27	0.34	0.82	0.89	1.78364	1.48349	0.305	0.855	1.63357
149	7	0	3	8	1	4	#N/A	#N/A	#N/A	#N/A	#N/A	#N/A	#N/A	#N/A	#N/A	#N/A	#N/A
152	8	6	3	9	7	4	0.31, 0.39	0.76, 0.86	0.31	0.39	0.76	0.86	1.78644	1.46484	0.35	0.81	1.62564
153	9	6	3	10	7	4	0.34, 1.00	0.75, 1.89	0.34	1.00	0.75	1.89	1.87129	1.34745	0.67	1.32	1.60937
154	6	0	3	7	1	4	#N/A	#N/A	#N/A	#N/A	#N/A	#N/A	#N/A	#N/A	#N/A	#N/A	#N/A
155	9	7	3	10	8	4	0.40, 1.00	0.75, 1.89	0.40	1.00	0.75	1.89	1.88595	1.33775	0.7	1.32	1.61185
156	7	4	3	8	5	4	0.17, 0.26	0.80, 0.89	0.17	0.26	0.80	0.89	1.78383	1.52247	0.215	0.845	1.65315
158	9	0	3	10	1	4	#N/A	#N/A	#N/A	#N/A	#N/A	#N/A	#N/A	#N/A	#N/A	#N/A	#N/A
160	8	7	3	9	8	4	0.36, 0.44	0.71, 0.80	0.36	0.44	0.71	0.80	1.79195	1.44476	0.4	0.755	1.61836
161	9	7	3	10	8	4	0.40, 1.00	0.75, 1.89	0.40	1.00	0.75	1.89	1.88595	1.33775	0.7	1.32	1.61185
163	9	4	3	10	5	4	0.27, 1.00	0.75, 1.89	0.27	1.00	0.75	1.89	1.8558	1.35904	0.635	1.32	1.60742
164	9	7	3	10	8	4	0.40, 1.00	0.75, 1.89	0.40	1.00	0.75	1.89	1.88595	1.33775	0.7	1.32	1.61185
165	10	7	3	11	8	4	0.46, 1.00	0.75, 1.89	0.46	1.00	0.75	1.89	1.90193	1.32826	0.73	1.32	1.6151
167	9	6	3	10	7	4	0.34, 1.00	0.75, 1.89	0.34	1.00	0.75	1.89	1.87129	1.34745	0.67	1.32	1.60937
168	10	6	3	11	7	4	0.40, 1.00	0.75, 1.89	0.40	1.00	0.75	1.89	1.88595	1.33775	0.7	1.32	1.61185
169	7	6	3	8	7	4	0.25, 0.36	0.71, 0.82	0.25	0.36	0.71	0.82	1.78364	1.48349	0.305	0.765	1.63357
170	10	7	3	11	8	4	0.46, 1.00	0.75, 1.89	0.46	1.00	0.75	1.89	1.90193	1.32826	0.73	1.32	1.6151
171	10	7	3	11	8	4	0.46, 1.00	0.75, 1.89	0.46	1.00	0.75	1.89	1.90193	1.32826	0.73	1.32	1.6151
172	9	0	3	10	1	4	#N/A	#N/A	#N/A	#N/A	#N/A	#N/A	#N/A	#N/A	#N/A	#N/A	#N/A
173	9	7	3	10	8	4	0.40, 1.00	0.75, 1.89	0.40	1.00	0.75	1.89	1.88595	1.33775	0.7	1.32	1.61185
174	9	0	3	10	1	4	#N/A	#N/A	#N/A	#N/A	#N/A	#N/A	#N/A	#N/A	#N/A	#N/A	#N/A
175	8	6	3	9	7	4	0.31, 0.39	0.76, 0.86	0.31	0.39	0.76	0.86	1.78644	1.46484	0.35	0.81	1.62564
176	10	7	3	11	8	4	0.46, 1.00	0.75, 1.89	0.46	1.00	0.75	1.89	1.90193	1.32826	0.73	1.32	1.6151
177	10	7	3	11	8	4	0.46, 1.00	0.75, 1.89	0.46	1.00	0.75	1.89	1.90193	1.32826	0.73	1.32	1.6151
178	11	0	3	12	1	4	#N/A	#N/A	#N/A	#N/A	#N/A	#N/A	#N/A	#N/A	#N/A	#N/A	#N/A
180	9	7	3	10	8	4	0.40, 1.00	0.75, 1.89	0.40	1.00	0.75	1.89	1.88595	1.33775	0.7	1.32	1.61185
181	9	6	3	10	7	4	0.34, 1.00	0.75, 1.89	0.34	1.00	0.75	1.89	1.87129	1.34745	0.67	1.32	1.60937
182	10	7	3	11	8	4	0.46, 1.00	0.75, 1.89	0.46	1.00	0.75	1.89	1.90193	1.32826	0.73	1.32	1.6151
184	8	7	3	9	8	4	0.36, 0.44	0.71, 0.80	0.36	0.44	0.71	0.80	1.79195	1.44476	0.4	0.755	1.61836
185	10	7	3	11	8	4	0.46, 1.00	0.75, 1.89	0.46	1.00	0.75	1.89	1.90193	1.32826	0.73	1.32	1.6151
187	7	0	3	8	1	4	#N/A	#N/A	#N/A	#N/A	#N/A	#N/A	#N/A	#N/A	#N/A	#N/A	#N/A
189	10	7	3	11	8	4	0.46, 1.00	0.75, 1.89	0.46	1.00	0.75	1.89	1.90193	1.32826	0.73	1.32	1.6151
190	11	0	3	12	1	4	#N/A	#N/A	#N/A	#N/A	#N/A	#N/A	#N/A	#N/A	#N/A	#N/A	#N/A
192	7	0	3	8	1	4	#N/A	#N/A	#N/A	#N/A	#N/A	#N/A	#N/A	#N/A	#N/A	#N/A	#N/A
193	7	0	3	8	1	4	#N/A	#N/A	#N/A	#N/A	#N/A	#N/A	#N/A	#N/A	#N/A	#N/A	#N/A
194	9	7	3	10	8	4	0.40, 1.00	0.75, 1.89	0.40	1.00	0.75	1.89	1.88595	1.33775	0.7	1.32	1.61185
195	10	7	3	11	8	4	0.46, 1.00	0.75, 1.89	0.46	1.00	0.75	1.89	1.90193	1.32826	0.73	1.32	1.6151
197	8	7	3	9	8	4	0.36, 0.44	0.71, 0.80	0.36	0.44	0.71	0.80	1.79195	1.44476	0.4	0.755	1.61836
198	8	0	3	9	1	4	#N/A	#N/A	#N/A	#N/A	#N/A	#N/A	#N/A	#N/A	#N/A	#N/A	#N/A
199	7	0	3	8	1	4	#N/A	#N/A	#N/A	#N/A	#N/A	#N/A	#N/A	#N/A	#N/A	#N/A	#N/A
200	9	7	3	10	8	4	0.40, 1.00	0.75, 1.89	0.40	1.00	0.75	1.89	1.88595	1.33775	0.7	1.32	1.61185
201	9	6	3	10	7	4	0.34, 1.00	0.75, 1.89	0.34	1.00	0.75	1.89	1.87129	1.34745	0.67	1.32	1.60937
203	10	7	3	11	8	4	0.46, 1.00	0.75, 1.89	0.46	1.00	0.75	1.89	1.90193	1.32826	0.73	1.32	1.6151
204	9	0	3	10	1	4	#N/A	#N/A	#N/A	#N/A	#N/A	#N/A	#N/A	#N/A	#N/A	#N/A	#N/A
205	9	5	3	10	6	4	0.31, 0.40	0.87, 0.96	0.31	0.40	0.87	0.96	1.78688	1.4628	0.355	0.915	1.62484
206	10	7	3	11	8	4	0.46, 1.00	0.75, 1.89	0.46	1.00	0.75	1.89	1.90193	1.32826	0.73	1.32	1.6151
207	9	7	3	10	8	4	0.40, 1.00	0.75, 1.89	0.40	1.00	0.75	1.89	1.88595	1.33775	0.7	1.32	1.61185
208	7	7	3	8	8	4	0.32, 0.41	0.66, 0.75	0.32	0.41	0.66	0.75	1.78782	1.45875	0.365	0.705	1.62328
210	9	7	3	10	8	4	0.40, 1.00	0.75, 1.89	0.40	1.00	0.75	1.89	1.88595	1.33775	0.7	1.32	1.61185
211	9	6	3	10	7	4	0.34, 1.00	0.75, 1.89	0.34	1.00	0.75	1.89	1.87129	1.34745	0.67	1.32	1.60937
213	9	6	3	10	7	4	0.34, 1.00	0.75, 1.89	0.34	1.00	0.75	1.89	1.87129	1.34745	0.67	1.32	1.60937
214	9	0	3	10	1	4	#N/A	#N/A	#N/A	#N/A	#N/A	#N/A	#N/A	#N/A	#N/A	#N/A	#N/A
217	10	6	3	11	7	4	0.40, 1.00	0.75, 1.89	0.40	1.00	0.75	1.89	1.88595	1.33775	0.7	1.32	1.61185
218	9	5	3	10	6	4	0.31, 0.40	0.87, 0.96	0.31	0.40	0.87	0.96	1.78688	1.4628	0.355	0.915	1.62484
219	10	5	3	11	6	4	0.37, 0.44	0.93, 1.00	0.37	0.44	0.93	1.00	1.79265	1.44279	0.405	0.965	1.61772
220	10	7	3	11	8	4	0.46, 1.00	0.75, 1.89	0.46	1.00	0.75	1.89	1.90193	1.32826	0.73	1.32	1.6151
221	10	7	3	11	8	4	0.46, 1.00	0.75, 1.89	0.46	1.00	0.75	1.89	1.90193	1.32826	0.73	1.32	1.6151
222	10	7	3	11	8	4	0.46, 1.00	0.75, 1.89	0.46	1.00	0.75	1.89	1.90193	1.32826	0.73	1.32	1.6151
223	9	7	3	10	8	4	0.40, 1.00	0.75, 1.89	0.40	1.00	0.75	1.89	1.88595	1.33775	0.7	1.32	1.61185
225	11	0	3	12	1	4	#N/A	#N/A	#N/A	#N/A	#N/A	#N/A	#N/A	#N/A	#N/A	#N/A	#N/A
226	9	0	3	10	1	4	#N/A	#N/A	#N/A	#N/A	#N/A	#N/A	#N/A	#N/A	#N/A	#N/A	#N/A
227	9	7	3	10	8	4	0.40, 1.00	0.75, 1.89	0.40	1.00	0.75	1.89	1.88595	1.33775	0.7	1.32	1.61185
228	9	6	3	10	7	4	0.34, 1.00	0.75, 1.89	0.34	1.00	0.75	1.89	1.87129	1.34745	0.67	1.32	1.60937
229	8	7	3	9	8	4	0.36, 0.44	0.71, 0.80	0.36	0.44	0.71	0.80	1.79195	1.44476	0.4	0.755	1.61836
230	8	6	3	9	7	4	0.31, 0.39	0.76, 0.86	0.31	0.39	0.76	0.86	1.78644	1.46484	0.35	0.81	1.62564
232	10	7	3	11	8	4	0.46, 1.00	0.75, 1.89	0.46	1.00	0.75	1.89	1.90193	1.32826	0.73	1.32	1.6151
233	9	0	3	10	1	4	#N/A	#N/A	#N/A	#N/A	#N/A	#N/A	#N/A	#N/A	#N/A	#N/A	#N/A
234	10	5	3	11	6	4	0.37, 0.44	0.93, 1.00	0.37	0.44	0.93	1.00	1.79265	1.44279	0.405	0.965	1.61772
235	10	7	3	11	8	4	0.46, 1.00	0.75, 1.89	0.46	1.00	0.75	1.89	1.90193	1.32826	0.73	1.32	1.6151
237	9	6	3	10	7	4	0.34, 1.00	0.75, 1.89	0.34	1.00	0.75	1.89	1.87129	1.34745	0.67	1.32	1.60937
238	10	7	3	11	8	4	0.46, 1.00	0.75, 1.89	0.46	1.00	0.75	1.89	1.90193	1.32826	0.73	1.32	1.6151
240	9	6	3	10	7	4	0.34, 1.00	0.75, 1.89	0.34	1.00	0.75	1.89	1.87129	1.34745	0.67	1.32	1.60937
241	9	6	3	10	7	4	0.34, 1.00	0.75, 1.89	0.34	1.00	0.75	1.89	1.87129	1.34745	0.67	1.32	1.60937
242	9	6	3	10	7	4	0.34, 1.00	0.75, 1.89	0.34	1.00	0.75	1.89	1.87129	1.34745	0.67	1.32	1.60937
243	9	5	3	10	6	4	0.31, 0.40	0.87, 0.96	0.31	0.40	0.87	0.96	1.78688	1.4628	0.355	0.915	1.62484
244	9	6	3	10	7	4	0.34, 1.00	0.75, 1.89	0.34	1.00	0.75	1.89	1.87129	1.34745	0.67	1.32	1.60937
245	7	0	3	8	1	4	#N/A	#N/A	#N/A	#N/A	#N/A	#N/A	#N/A	#N/A	#N/A	#N/A	#N/A
246	10	6	3	11	7	4	0.40, 1.00	0.75, 1.89	0.40	1.00	0.75	1.89	1.88595	1.33775	0.7	1.32	1.61185
247	10	7	3	11	8	4	0.46, 1.00	0.75, 1.89	0.46	1.00	0.75	1.89	1.90193	1.32826	0.73	1.32	1.6151
248	9	7	3	10	8	4	0.40, 1.00	0.75, 1.89	0.40	1.00	0.75	1.89	1.88595	1.33775	0.7	1.32	1.61185
249	9	6	3	10	7	4	0.34, 1.00	0.75, 1.89	0.34	1.00	0.75	1.89	1.87129	1.34745	0.67	1.32	1.60937
250	9	5	3	10	6	4	0.31, 0.40	0.87, 0.96	0.31	0.40	0.87	0.96	1.78688	1.4628	0.355	0.915	1.62484
251	9	7	3	10	8	4	0.40, 1.00	0.75, 1.89	0.40	1.00	0.75	1.89	1.88595	1.33775	0.7	1.32	1.61185
253	8	7	3	9	8	4	0.36, 0.44	0.71, 0.80	0.36	0.44	0.71	0.80	1.79195	1.44476	0.4	0.755	1.61836
254	9	7	3	10	8	4	0.40, 1.00	0.75, 1.89	0.40	1.00	0.75	1.89	1.88595	1.33775	0.7	1.32	1.61185
255	12	0	3	13	1	4	#N/A	#N/A	#N/A	#N/A	#N/A	#N/A	#N/A	#N/A	#N/A	#N/A	#N/A
256	9	7	3	10	8	4	0.40, 1.00	0.75, 1.89	0.40	1.00	0.75	1.89	1.88595	1.33775	0.7	1.32	1.61185
257	10	7	3	11	8	4	0.46, 1.00	0.75, 1.89	0.46	1.00	0.75	1.89	1.90193	1.32826	0.73	1.32	1.6151
258	10	7	3	11	8	4	0.46, 1.00	0.75, 1.89	0.46	1.00	0.75	1.89	1.90193	1.32826	0.73	1.32	1.6151
259	10	7	3	11	8	4	0.46, 1.00	0.75, 1.89	0.46	1.00	0.75	1.89	1.90193	1.32826	0.73	1.32	1.6151
261	9	6	3	10	7	4	0.34, 1.00	0.75, 1.89	0.34	1.00	0.75	1.89	1.87129	1.34745	0.67	1.32	1.60937
262	7	5	3	8	6	4	0.22, 0.30	0.77, 0.85	0.22	0.30	0.77	0.85	1.7828	1.5027	0.26	0.81	1.64275
263	10	6	3	11	7	4	0.40, 1.00	0.75, 1.89	0.40	1.00	0.75	1.89	1.88595	1.33775	0.7	1.32	1.61185
265	10	7	3	11	8	4	0.46, 1.00	0.75, 1.89	0.46	1.00	0.75	1.89	1.90193	1.32826	0.73	1.32	1.6151
266	10	7	3	11	8	4	0.46, 1.00	0.75, 1.89	0.46	1.00	0.75	1.89	1.90193	1.32826	0.73	1.32	1.6151
267	7	0	3	8	1	4	#N/A	#N/A	#N/A	#N/A	#N/A	#N/A	#N/A	#N/A	#N/A	#N/A	#N/A
268	9	4	3	10	5	4	0.27, 1.00	0.75, 1.89	0.27	1.00	0.75	1.89	1.8558	1.35904	0.635	1.32	1.60742
269	9	7	3	10	8	4	0.40, 1.00	0.75, 1.89	0.40	1.00	0.75	1.89	1.88595	1.33775	0.7	1.32	1.61185
270	8	7	3	9	8	4	0.36, 0.44	0.71, 0.80	0.36	0.44	0.71	0.80	1.79195	1.44476	0.4	0.755	1.61836
272	10	7	3	11	8	4	0.46, 1.00	0.75, 1.89	0.46	1.00	0.75	1.89	1.90193	1.32826	0.73	1.32	1.6151
273	9	8	3	10	9	4	0.45, 1.00	0.71, 1.89	0.45	1.00	0.71	1.89	1.89917	1.32983	0.725	1.3	1.6145
275	8	7	3	9	8	4	0.36, 0.44	0.71, 0.80	0.36	0.44	0.71	0.80	1.79195	1.44476	0.4	0.755	1.61836
276	10	6	3	11	7	4	0.40, 1.00	0.75, 1.89	0.40	1.00	0.75	1.89	1.88595	1.33775	0.7	1.32	1.61185
278	11	7	3	12	8	4	0.50, 0.59	0.86, 0.96	0.50	0.59	0.86	0.96	1.82344	1.39022	0.545	0.91	1.60683
279	9	7	3	10	8	4	0.40, 1.00	0.75, 1.89	0.40	1.00	0.75	1.89	1.88595	1.33775	0.7	1.32	1.61185
280	10	7	3	11	8	4	0.46, 1.00	0.75, 1.89	0.46	1.00	0.75	1.89	1.90193	1.32826	0.73	1.32	1.6151
281	10	0	3	11	1	4	#N/A	#N/A	#N/A	#N/A	#N/A	#N/A	#N/A	#N/A	#N/A	#N/A	#N/A
283	8	0	3	9	1	4	#N/A	#N/A	#N/A	#N/A	#N/A	#N/A	#N/A	#N/A	#N/A	#N/A	#N/A
284	9	6	3	10	7	4	0.34, 1.00	0.75, 1.89	0.34	1.00	0.75	1.89	1.87129	1.34745	0.67	1.32	1.60937
285	8	6	3	9	7	4	0.31, 0.39	0.76, 0.86	0.31	0.39	0.76	0.86	1.78644	1.46484	0.35	0.81	1.62564
286	10	5	3	11	6	4	0.37, 0.44	0.93, 1.00	0.37	0.44	0.93	1.00	1.79265	1.44279	0.405	0.965	1.61772
287	10	7	3	11	8	4	0.46, 1.00	0.75, 1.89	0.46	1.00	0.75	1.89	1.90193	1.32826	0.73	1.32	1.6151
289	10	7	3	11	8	4	0.46, 1.00	0.75, 1.89	0.46	1.00	0.75	1.89	1.90193	1.32826	0.73	1.32	1.6151
290	10	7	3	11	8	4	0.46, 1.00	0.75, 1.89	0.46	1.00	0.75	1.89	1.90193	1.32826	0.73	1.32	1.6151
291	8	4	3	9	5	4	0.23, 0.30	0.86, 0.93	0.23	0.30	0.86	0.93	1.7828	1.50054	0.265	0.895	1.64167
292	9	6	3	10	7	4	0.34, 1.00	0.75, 1.89	0.34	1.00	0.75	1.89	1.87129	1.34745	0.67	1.32	1.60937
293	7	10	3	8	11	4	0.46, 0.55	0.51, 0.60	0.46	0.55	0.51	0.60	1.81233	1.40473	0.505	0.555	1.60853
295	9	6	3	10	7	4	0.34, 1.00	0.75, 1.89	0.34	1.00	0.75	1.89	1.87129	1.34745	0.67	1.32	1.60937
296	10	7	3	11	8	4	0.46, 1.00	0.75, 1.89	0.46	1.00	0.75	1.89	1.90193	1.32826	0.73	1.32	1.6151
297	10	7	3	11	8	4	0.46, 1.00	0.75, 1.89	0.46	1.00	0.75	1.89	1.90193	1.32826	0.73	1.32	1.6151
298	10	7	3	11	8	4	0.46, 1.00	0.75, 1.89	0.46	1.00	0.75	1.89	1.90193	1.32826	0.73	1.32	1.6151
299	9	6	3	10	7	4	0.34, 1.00	0.75, 1.89	0.34	1.00	0.75	1.89	1.87129	1.34745	0.67	1.32	1.60937
300	7	6	3	8	7	4	0.25, 0.36	0.71, 0.82	0.25	0.36	0.71	0.82	1.78364	1.48349	0.305	0.765	1.63357
75	8	0	4	9	1	5	#N/A	#N/A	#N/A	#N/A	#N/A	#N/A	#N/A	#N/A	#N/A	#N/A	#N/A
202	7	12	4	8	13	5	0.57, 0.64	0.40, 0.49	0.57	0.64	0.40	0.49	3.95541	2.24677	0.605	0.445	3.10109
231	9	3	4	10	4	5	0.22, 1.00	0.75, 1.89	0.22	1.00	0.75	1.89	3.96281	2.2476	0.61	1.32	3.1052

## Sheet: baseline claude
Feature	S1	S2	S3	S1-corrected	S2-corrected	S3-corrected	sigma range	alpha range	sigma lower bound	sigma upper bound	alpha lower bound	alpha upper bound	lambda upper bound	lambda lower bound	sigma	alpha	lambda
1	7	6	4	8	7	5	0.25, 0.36	0.71, 0.82	0.25	0.36	0.71	0.82	3.66811	2.26747	0.305	0.765	2.96779
2	7	6	4	8	7	5	0.25, 0.36	0.71, 0.82	0.25	0.36	0.71	0.82	3.66811	2.26747	0.305	0.765	2.96779
3	7	6	5	8	7	6	0.25, 0.36	0.71, 0.82	0.25	0.36	0.71	0.82	4.77515	3.66811	0.305	0.765	4.22163
4	7	6	6	8	7	7	0.25, 0.36	0.71, 0.82	0.25	0.36	0.71	0.82	13.5323	4.77515	0.305	0.765	9.15372
5	7	6	5	8	7	6	0.25, 0.36	0.71, 0.82	0.25	0.36	0.71	0.82	4.77515	3.66811	0.305	0.765	4.22163
6	7	6	4	8	7	5	0.25, 0.36	0.71, 0.82	0.25	0.36	0.71	0.82	3.66811	2.26747	0.305	0.765	2.96779
7	7	6	6	8	7	7	0.25, 0.36	0.71, 0.82	0.25	0.36	0.71	0.82	13.5323	4.77515	0.305	0.765	9.15372
8	7	6	4	8	7	5	0.25, 0.36	0.71, 0.82	0.25	0.36	0.71	0.82	3.66811	2.26747	0.305	0.765	2.96779
9	7	6	7	8	7	8	0.25, 0.36	0.71, 0.82	0.25	0.36	0.71	0.82	13.5323	4.77515	0.305	0.765	9.15372
10	7	6	5	8	7	6	0.25, 0.36	0.71, 0.82	0.25	0.36	0.71	0.82	4.77515	3.66811	0.305	0.765	4.22163
11	7	6	4	8	7	5	0.25, 0.36	0.71, 0.82	0.25	0.36	0.71	0.82	3.66811	2.26747	0.305	0.765	2.96779
12	7	10	6	8	11	7	0.46, 0.55	0.51, 0.60	0.46	0.55	0.51	0.60	13.4132	4.90786	0.505	0.555	9.16051
13	7	6	4	8	7	5	0.25, 0.36	0.71, 0.82	0.25	0.36	0.71	0.82	3.66811	2.26747	0.305	0.765	2.96779
14	7	6	4	8	7	5	0.25, 0.36	0.71, 0.82	0.25	0.36	0.71	0.82	3.66811	2.26747	0.305	0.765	2.96779
15	7	6	6	8	7	7	0.25, 0.36	0.71, 0.82	0.25	0.36	0.71	0.82	13.5323	4.77515	0.305	0.765	9.15372
16	7	6	5	8	7	6	0.25, 0.36	0.71, 0.82	0.25	0.36	0.71	0.82	4.77515	3.66811	0.305	0.765	4.22163
17	7	6	5	8	7	6	0.25, 0.36	0.71, 0.82	0.25	0.36	0.71	0.82	4.77515	3.66811	0.305	0.765	4.22163
18	7	6	6	8	7	7	0.25, 0.36	0.71, 0.82	0.25	0.36	0.71	0.82	13.5323	4.77515	0.305	0.765	9.15372
19	7	6	4	8	7	5	0.25, 0.36	0.71, 0.82	0.25	0.36	0.71	0.82	3.66811	2.26747	0.305	0.765	2.96779
20	7	6	6	8	7	7	0.25, 0.36	0.71, 0.82	0.25	0.36	0.71	0.82	13.5323	4.77515	0.305	0.765	9.15372
21	7	6	6	8	7	7	0.25, 0.36	0.71, 0.82	0.25	0.36	0.71	0.82	13.5323	4.77515	0.305	0.765	9.15372
22	7	6	5	8	7	6	0.25, 0.36	0.71, 0.82	0.25	0.36	0.71	0.82	4.77515	3.66811	0.305	0.765	4.22163
23	7	6	4	8	7	5	0.25, 0.36	0.71, 0.82	0.25	0.36	0.71	0.82	3.66811	2.26747	0.305	0.765	2.96779
24	6	7	6	7	8	7	0.26, 0.36	0.60, 0.70	0.26	0.36	0.60	0.70	13.5242	4.77667	0.31	0.65	9.15043
25	7	6	5	8	7	6	0.25, 0.36	0.71, 0.82	0.25	0.36	0.71	0.82	4.77515	3.66811	0.305	0.765	4.22163
26	7	6	6	8	7	7	0.25, 0.36	0.71, 0.82	0.25	0.36	0.71	0.82	13.5323	4.77515	0.305	0.765	9.15372
27	7	6	4	8	7	5	0.25, 0.36	0.71, 0.82	0.25	0.36	0.71	0.82	3.66811	2.26747	0.305	0.765	2.96779
28	7	6	4	8	7	5	0.25, 0.36	0.71, 0.82	0.25	0.36	0.71	0.82	3.66811	2.26747	0.305	0.765	2.96779
29	7	6	6	8	7	7	0.25, 0.36	0.71, 0.82	0.25	0.36	0.71	0.82	13.5323	4.77515	0.305	0.765	9.15372
30	7	6	4	8	7	5	0.25, 0.36	0.71, 0.82	0.25	0.36	0.71	0.82	3.66811	2.26747	0.305	0.765	2.96779
31	7	6	5	8	7	6	0.25, 0.36	0.71, 0.82	0.25	0.36	0.71	0.82	4.77515	3.66811	0.305	0.765	4.22163
32	7	6	5	8	7	6	0.25, 0.36	0.71, 0.82	0.25	0.36	0.71	0.82	4.77515	3.66811	0.305	0.765	4.22163
33	7	6	5	8	7	6	0.25, 0.36	0.71, 0.82	0.25	0.36	0.71	0.82	4.77515	3.66811	0.305	0.765	4.22163
34	7	6	4	8	7	5	0.25, 0.36	0.71, 0.82	0.25	0.36	0.71	0.82	3.66811	2.26747	0.305	0.765	2.96779
35	7	6	4	8	7	5	0.25, 0.36	0.71, 0.82	0.25	0.36	0.71	0.82	3.66811	2.26747	0.305	0.765	2.96779
36	7	6	4	8	7	5	0.25, 0.36	0.71, 0.82	0.25	0.36	0.71	0.82	3.66811	2.26747	0.305	0.765	2.96779
37	7	6	6	8	7	7	0.25, 0.36	0.71, 0.82	0.25	0.36	0.71	0.82	13.5323	4.77515	0.305	0.765	9.15372
38	7	6	4	8	7	5	0.25, 0.36	0.71, 0.82	0.25	0.36	0.71	0.82	3.66811	2.26747	0.305	0.765	2.96779
39	7	6	6	8	7	7	0.25, 0.36	0.71, 0.82	0.25	0.36	0.71	0.82	13.5323	4.77515	0.305	0.765	9.15372
40	7	6	6	8	7	7	0.25, 0.36	0.71, 0.82	0.25	0.36	0.71	0.82	13.5323	4.77515	0.305	0.765	9.15372
41	7	6	6	8	7	7	0.25, 0.36	0.71, 0.82	0.25	0.36	0.71	0.82	13.5323	4.77515	0.305	0.765	9.15372
42	7	6	6	8	7	7	0.25, 0.36	0.71, 0.82	0.25	0.36	0.71	0.82	13.5323	4.77515	0.305	0.765	9.15372
43	7	6	5	8	7	6	0.25, 0.36	0.71, 0.82	0.25	0.36	0.71	0.82	4.77515	3.66811	0.305	0.765	4.22163
44	7	6	6	8	7	7	0.25, 0.36	0.71, 0.82	0.25	0.36	0.71	0.82	13.5323	4.77515	0.305	0.765	9.15372
45	7	6	5	8	7	6	0.25, 0.36	0.71, 0.82	0.25	0.36	0.71	0.82	4.77515	3.66811	0.305	0.765	4.22163
46	7	6	6	8	7	7	0.25, 0.36	0.71, 0.82	0.25	0.36	0.71	0.82	13.5323	4.77515	0.305	0.765	9.15372
47	7	6	5	8	7	6	0.25, 0.36	0.71, 0.82	0.25	0.36	0.71	0.82	4.77515	3.66811	0.305	0.765	4.22163
48	7	6	6	8	7	7	0.25, 0.36	0.71, 0.82	0.25	0.36	0.71	0.82	13.5323	4.77515	0.305	0.765	9.15372
49	7	6	4	8	7	5	0.25, 0.36	0.71, 0.82	0.25	0.36	0.71	0.82	3.66811	2.26747	0.305	0.765	2.96779
50	7	6	6	8	7	7	0.25, 0.36	0.71, 0.82	0.25	0.36	0.71	0.82	13.5323	4.77515	0.305	0.765	9.15372
51	7	6	5	8	7	6	0.25, 0.36	0.71, 0.82	0.25	0.36	0.71	0.82	4.77515	3.66811	0.305	0.765	4.22163
52	7	6	4	8	7	5	0.25, 0.36	0.71, 0.82	0.25	0.36	0.71	0.82	3.66811	2.26747	0.305	0.765	2.96779
53	7	6	6	8	7	7	0.25, 0.36	0.71, 0.82	0.25	0.36	0.71	0.82	13.5323	4.77515	0.305	0.765	9.15372
54	7	6	6	8	7	7	0.25, 0.36	0.71, 0.82	0.25	0.36	0.71	0.82	13.5323	4.77515	0.305	0.765	9.15372
55	7	6	6	8	7	7	0.25, 0.36	0.71, 0.82	0.25	0.36	0.71	0.82	13.5323	4.77515	0.305	0.765	9.15372
56	7	6	6	8	7	7	0.25, 0.36	0.71, 0.82	0.25	0.36	0.71	0.82	13.5323	4.77515	0.305	0.765	9.15372
57	7	6	6	8	7	7	0.25, 0.36	0.71, 0.82	0.25	0.36	0.71	0.82	13.5323	4.77515	0.305	0.765	9.15372
58	7	6	5	8	7	6	0.25, 0.36	0.71, 0.82	0.25	0.36	0.71	0.82	4.77515	3.66811	0.305	0.765	4.22163
59	7	6	6	8	7	7	0.25, 0.36	0.71, 0.82	0.25	0.36	0.71	0.82	13.5323	4.77515	0.305	0.765	9.15372
60	7	6	6	8	7	7	0.25, 0.36	0.71, 0.82	0.25	0.36	0.71	0.82	13.5323	4.77515	0.305	0.765	9.15372
61	7	6	7	8	7	8	0.25, 0.36	0.71, 0.82	0.25	0.36	0.71	0.82	13.5323	4.77515	0.305	0.765	9.15372
62	7	6	5	8	7	6	0.25, 0.36	0.71, 0.82	0.25	0.36	0.71	0.82	4.77515	3.66811	0.305	0.765	4.22163
63	7	6	4	8	7	5	0.25, 0.36	0.71, 0.82	0.25	0.36	0.71	0.82	3.66811	2.26747	0.305	0.765	2.96779
64	7	6	5	8	7	6	0.25, 0.36	0.71, 0.82	0.25	0.36	0.71	0.82	4.77515	3.66811	0.305	0.765	4.22163
65	7	6	4	8	7	5	0.25, 0.36	0.71, 0.82	0.25	0.36	0.71	0.82	3.66811	2.26747	0.305	0.765	2.96779
66	7	6	6	8	7	7	0.25, 0.36	0.71, 0.82	0.25	0.36	0.71	0.82	13.5323	4.77515	0.305	0.765	9.15372
67	7	6	4	8	7	5	0.25, 0.36	0.71, 0.82	0.25	0.36	0.71	0.82	3.66811	2.26747	0.305	0.765	2.96779
68	7	6	5	8	7	6	0.25, 0.36	0.71, 0.82	0.25	0.36	0.71	0.82	4.77515	3.66811	0.305	0.765	4.22163
69	7	6	6	8	7	7	0.25, 0.36	0.71, 0.82	0.25	0.36	0.71	0.82	13.5323	4.77515	0.305	0.765	9.15372
70	7	6	4	8	7	5	0.25, 0.36	0.71, 0.82	0.25	0.36	0.71	0.82	3.66811	2.26747	0.305	0.765	2.96779
71	7	6	5	8	7	6	0.25, 0.36	0.71, 0.82	0.25	0.36	0.71	0.82	4.77515	3.66811	0.305	0.765	4.22163
72	7	6	6	8	7	7	0.25, 0.36	0.71, 0.82	0.25	0.36	0.71	0.82	13.5323	4.77515	0.305	0.765	9.15372
73	7	6	6	8	7	7	0.25, 0.36	0.71, 0.82	0.25	0.36	0.71	0.82	13.5323	4.77515	0.305	0.765	9.15372
74	7	6	5	8	7	6	0.25, 0.36	0.71, 0.82	0.25	0.36	0.71	0.82	4.77515	3.66811	0.305	0.765	4.22163
75	7	6	6	8	7	7	0.25, 0.36	0.71, 0.82	0.25	0.36	0.71	0.82	13.5323	4.77515	0.305	0.765	9.15372
76	7	6	5	8	7	6	0.25, 0.36	0.71, 0.82	0.25	0.36	0.71	0.82	4.77515	3.66811	0.305	0.765	4.22163
77	7	6	6	8	7	7	0.25, 0.36	0.71, 0.82	0.25	0.36	0.71	0.82	13.5323	4.77515	0.305	0.765	9.15372
78	7	6	4	8	7	5	0.25, 0.36	0.71, 0.82	0.25	0.36	0.71	0.82	3.66811	2.26747	0.305	0.765	2.96779
79	7	9	6	8	10	7	0.41, 0.50	0.56, 0.66	0.41	0.50	0.56	0.66	13.4027	4.86017	0.455	0.61	9.13142
80	7	9	6	8	10	7	0.41, 0.50	0.56, 0.66	0.41	0.50	0.56	0.66	13.4027	4.86017	0.455	0.61	9.13142
81	7	6	6	8	7	7	0.25, 0.36	0.71, 0.82	0.25	0.36	0.71	0.82	13.5323	4.77515	0.305	0.765	9.15372
82	7	6	6	8	7	7	0.25, 0.36	0.71, 0.82	0.25	0.36	0.71	0.82	13.5323	4.77515	0.305	0.765	9.15372
83	7	6	4	8	7	5	0.25, 0.36	0.71, 0.82	0.25	0.36	0.71	0.82	3.66811	2.26747	0.305	0.765	2.96779
84	7	6	6	8	7	7	0.25, 0.36	0.71, 0.82	0.25	0.36	0.71	0.82	13.5323	4.77515	0.305	0.765	9.15372
85	7	6	4	8	7	5	0.25, 0.36	0.71, 0.82	0.25	0.36	0.71	0.82	3.66811	2.26747	0.305	0.765	2.96779
86	7	6	6	8	7	7	0.25, 0.36	0.71, 0.82	0.25	0.36	0.71	0.82	13.5323	4.77515	0.305	0.765	9.15372
87	7	6	4	8	7	5	0.25, 0.36	0.71, 0.82	0.25	0.36	0.71	0.82	3.66811	2.26747	0.305	0.765	2.96779
88	7	6	6	8	7	7	0.25, 0.36	0.71, 0.82	0.25	0.36	0.71	0.82	13.5323	4.77515	0.305	0.765	9.15372
89	7	6	5	8	7	6	0.25, 0.36	0.71, 0.82	0.25	0.36	0.71	0.82	4.77515	3.66811	0.305	0.765	4.22163
90	7	6	4	8	7	5	0.25, 0.36	0.71, 0.82	0.25	0.36	0.71	0.82	3.66811	2.26747	0.305	0.765	2.96779
91	8	6	4	9	7	5	0.31, 0.39	0.76, 0.86	0.31	0.39	0.76	0.86	3.69366	2.25598	0.35	0.81	2.97482
92	7	6	6	8	7	7	0.25, 0.36	0.71, 0.82	0.25	0.36	0.71	0.82	13.5323	4.77515	0.305	0.765	9.15372
93	7	6	6	8	7	7	0.25, 0.36	0.71, 0.82	0.25	0.36	0.71	0.82	13.5323	4.77515	0.305	0.765	9.15372
94	7	6	6	8	7	7	0.25, 0.36	0.71, 0.82	0.25	0.36	0.71	0.82	13.5323	4.77515	0.305	0.765	9.15372
95	7	6	4	8	7	5	0.25, 0.36	0.71, 0.82	0.25	0.36	0.71	0.82	3.66811	2.26747	0.305	0.765	2.96779
96	7	6	5	8	7	6	0.25, 0.36	0.71, 0.82	0.25	0.36	0.71	0.82	4.77515	3.66811	0.305	0.765	4.22163
97	7	6	4	8	7	5	0.25, 0.36	0.71, 0.82	0.25	0.36	0.71	0.82	3.66811	2.26747	0.305	0.765	2.96779
98	7	6	6	8	7	7	0.25, 0.36	0.71, 0.82	0.25	0.36	0.71	0.82	13.5323	4.77515	0.305	0.765	9.15372
99	7	6	5	8	7	6	0.25, 0.36	0.71, 0.82	0.25	0.36	0.71	0.82	4.77515	3.66811	0.305	0.765	4.22163
100	7	6	4	8	7	5	0.25, 0.36	0.71, 0.82	0.25	0.36	0.71	0.82	3.66811	2.26747	0.305	0.765	2.96779
101	7	6	5	8	7	6	0.25, 0.36	0.71, 0.82	0.25	0.36	0.71	0.82	4.77515	3.66811	0.305	0.765	4.22163
102	7	6	4	8	7	5	0.25, 0.36	0.71, 0.82	0.25	0.36	0.71	0.82	3.66811	2.26747	0.305	0.765	2.96779
103	7	6	4	8	7	5	0.25, 0.36	0.71, 0.82	0.25	0.36	0.71	0.82	3.66811	2.26747	0.305	0.765	2.96779
104	7	6	6	8	7	7	0.25, 0.36	0.71, 0.82	0.25	0.36	0.71	0.82	13.5323	4.77515	0.305	0.765	9.15372
105	7	6	6	8	7	7	0.25, 0.36	0.71, 0.82	0.25	0.36	0.71	0.82	13.5323	4.77515	0.305	0.765	9.15372
106	7	6	5	8	7	6	0.25, 0.36	0.71, 0.82	0.25	0.36	0.71	0.82	4.77515	3.66811	0.305	0.765	4.22163
107	7	6	4	8	7	5	0.25, 0.36	0.71, 0.82	0.25	0.36	0.71	0.82	3.66811	2.26747	0.305	0.765	2.96779
108	7	6	6	8	7	7	0.25, 0.36	0.71, 0.82	0.25	0.36	0.71	0.82	13.5323	4.77515	0.305	0.765	9.15372
109	7	6	4	8	7	5	0.25, 0.36	0.71, 0.82	0.25	0.36	0.71	0.82	3.66811	2.26747	0.305	0.765	2.96779
110	7	6	6	8	7	7	0.25, 0.36	0.71, 0.82	0.25	0.36	0.71	0.82	13.5323	4.77515	0.305	0.765	9.15372
111	7	6	6	8	7	7	0.25, 0.36	0.71, 0.82	0.25	0.36	0.71	0.82	13.5323	4.77515	0.305	0.765	9.15372
112	7	6	4	8	7	5	0.25, 0.36	0.71, 0.82	0.25	0.36	0.71	0.82	3.66811	2.26747	0.305	0.765	2.96779
113	7	6	7	8	7	8	0.25, 0.36	0.71, 0.82	0.25	0.36	0.71	0.82	13.5323	4.77515	0.305	0.765	9.15372
114	7	6	4	8	7	5	0.25, 0.36	0.71, 0.82	0.25	0.36	0.71	0.82	3.66811	2.26747	0.305	0.765	2.96779
115	7	6	5	8	7	6	0.25, 0.36	0.71, 0.82	0.25	0.36	0.71	0.82	4.77515	3.66811	0.305	0.765	4.22163
116	7	6	4	8	7	5	0.25, 0.36	0.71, 0.82	0.25	0.36	0.71	0.82	3.66811	2.26747	0.305	0.765	2.96779
117	7	6	6	8	7	7	0.25, 0.36	0.71, 0.82	0.25	0.36	0.71	0.82	13.5323	4.77515	0.305	0.765	9.15372
118	7	6	6	8	7	7	0.25, 0.36	0.71, 0.82	0.25	0.36	0.71	0.82	13.5323	4.77515	0.305	0.765	9.15372
119	7	6	6	8	7	7	0.25, 0.36	0.71, 0.82	0.25	0.36	0.71	0.82	13.5323	4.77515	0.305	0.765	9.15372
120	7	6	6	8	7	7	0.25, 0.36	0.71, 0.82	0.25	0.36	0.71	0.82	13.5323	4.77515	0.305	0.765	9.15372
121	7	6	4	8	7	5	0.25, 0.36	0.71, 0.82	0.25	0.36	0.71	0.82	3.66811	2.26747	0.305	0.765	2.96779
122	7	6	6	8	7	7	0.25, 0.36	0.71, 0.82	0.25	0.36	0.71	0.82	13.5323	4.77515	0.305	0.765	9.15372
123	7	6	6	8	7	7	0.25, 0.36	0.71, 0.82	0.25	0.36	0.71	0.82	13.5323	4.77515	0.305	0.765	9.15372
124	7	6	6	8	7	7	0.25, 0.36	0.71, 0.82	0.25	0.36	0.71	0.82	13.5323	4.77515	0.305	0.765	9.15372
125	7	6	6	8	7	7	0.25, 0.36	0.71, 0.82	0.25	0.36	0.71	0.82	13.5323	4.77515	0.305	0.765	9.15372
126	7	6	4	8	7	5	0.25, 0.36	0.71, 0.82	0.25	0.36	0.71	0.82	3.66811	2.26747	0.305	0.765	2.96779
127	7	6	6	8	7	7	0.25, 0.36	0.71, 0.82	0.25	0.36	0.71	0.82	13.5323	4.77515	0.305	0.765	9.15372
128	7	6	6	8	7	7	0.25, 0.36	0.71, 0.82	0.25	0.36	0.71	0.82	13.5323	4.77515	0.305	0.765	9.15372
129	7	6	4	8	7	5	0.25, 0.36	0.71, 0.82	0.25	0.36	0.71	0.82	3.66811	2.26747	0.305	0.765	2.96779
130	7	6	6	8	7	7	0.25, 0.36	0.71, 0.82	0.25	0.36	0.71	0.82	13.5323	4.77515	0.305	0.765	9.15372
131	7	6	4	8	7	5	0.25, 0.36	0.71, 0.82	0.25	0.36	0.71	0.82	3.66811	2.26747	0.305	0.765	2.96779
132	7	6	4	8	7	5	0.25, 0.36	0.71, 0.82	0.25	0.36	0.71	0.82	3.66811	2.26747	0.305	0.765	2.96779
133	7	6	4	8	7	5	0.25, 0.36	0.71, 0.82	0.25	0.36	0.71	0.82	3.66811	2.26747	0.305	0.765	2.96779
134	7	6	6	8	7	7	0.25, 0.36	0.71, 0.82	0.25	0.36	0.71	0.82	13.5323	4.77515	0.305	0.765	9.15372
135	7	6	6	8	7	7	0.25, 0.36	0.71, 0.82	0.25	0.36	0.71	0.82	13.5323	4.77515	0.305	0.765	9.15372
136	7	6	4	8	7	5	0.25, 0.36	0.71, 0.82	0.25	0.36	0.71	0.82	3.66811	2.26747	0.305	0.765	2.96779
137	7	6	5	8	7	6	0.25, 0.36	0.71, 0.82	0.25	0.36	0.71	0.82	4.77515	3.66811	0.305	0.765	4.22163
138	7	6	6	8	7	7	0.25, 0.36	0.71, 0.82	0.25	0.36	0.71	0.82	13.5323	4.77515	0.305	0.765	9.15372
139	7	6	5	8	7	6	0.25, 0.36	0.71, 0.82	0.25	0.36	0.71	0.82	4.77515	3.66811	0.305	0.765	4.22163
140	7	6	6	8	7	7	0.25, 0.36	0.71, 0.82	0.25	0.36	0.71	0.82	13.5323	4.77515	0.305	0.765	9.15372
141	7	6	4	8	7	5	0.25, 0.36	0.71, 0.82	0.25	0.36	0.71	0.82	3.66811	2.26747	0.305	0.765	2.96779
142	7	6	6	8	7	7	0.25, 0.36	0.71, 0.82	0.25	0.36	0.71	0.82	13.5323	4.77515	0.305	0.765	9.15372
143	7	6	5	8	7	6	0.25, 0.36	0.71, 0.82	0.25	0.36	0.71	0.82	4.77515	3.66811	0.305	0.765	4.22163
144	7	6	6	8	7	7	0.25, 0.36	0.71, 0.82	0.25	0.36	0.71	0.82	13.5323	4.77515	0.305	0.765	9.15372
145	7	6	6	8	7	7	0.25, 0.36	0.71, 0.82	0.25	0.36	0.71	0.82	13.5323	4.77515	0.305	0.765	9.15372
146	7	6	5	8	7	6	0.25, 0.36	0.71, 0.82	0.25	0.36	0.71	0.82	4.77515	3.66811	0.305	0.765	4.22163
147	7	6	4	8	7	5	0.25, 0.36	0.71, 0.82	0.25	0.36	0.71	0.82	3.66811	2.26747	0.305	0.765	2.96779
148	7	6	6	8	7	7	0.25, 0.36	0.71, 0.82	0.25	0.36	0.71	0.82	13.5323	4.77515	0.305	0.765	9.15372
149	7	6	6	8	7	7	0.25, 0.36	0.71, 0.82	0.25	0.36	0.71	0.82	13.5323	4.77515	0.305	0.765	9.15372
150	7	6	6	8	7	7	0.25, 0.36	0.71, 0.82	0.25	0.36	0.71	0.82	13.5323	4.77515	0.305	0.765	9.15372
151	7	6	6	8	7	7	0.25, 0.36	0.71, 0.82	0.25	0.36	0.71	0.82	13.5323	4.77515	0.305	0.765	9.15372
152	7	6	6	8	7	7	0.25, 0.36	0.71, 0.82	0.25	0.36	0.71	0.82	13.5323	4.77515	0.305	0.765	9.15372
153	7	6	6	8	7	7	0.25, 0.36	0.71, 0.82	0.25	0.36	0.71	0.82	13.5323	4.77515	0.305	0.765	9.15372
154	7	6	5	8	7	6	0.25, 0.36	0.71, 0.82	0.25	0.36	0.71	0.82	4.77515	3.66811	0.305	0.765	4.22163
155	7	6	6	8	7	7	0.25, 0.36	0.71, 0.82	0.25	0.36	0.71	0.82	13.5323	4.77515	0.305	0.765	9.15372
156	7	6	6	8	7	7	0.25, 0.36	0.71, 0.82	0.25	0.36	0.71	0.82	13.5323	4.77515	0.305	0.765	9.15372
157	7	6	5	8	7	6	0.25, 0.36	0.71, 0.82	0.25	0.36	0.71	0.82	4.77515	3.66811	0.305	0.765	4.22163
158	7	6	6	8	7	7	0.25, 0.36	0.71, 0.82	0.25	0.36	0.71	0.82	13.5323	4.77515	0.305	0.765	9.15372
159	7	6	4	8	7	5	0.25, 0.36	0.71, 0.82	0.25	0.36	0.71	0.82	3.66811	2.26747	0.305	0.765	2.96779
160	7	6	6	8	7	7	0.25, 0.36	0.71, 0.82	0.25	0.36	0.71	0.82	13.5323	4.77515	0.305	0.765	9.15372
161	7	6	5	8	7	6	0.25, 0.36	0.71, 0.82	0.25	0.36	0.71	0.82	4.77515	3.66811	0.305	0.765	4.22163
162	7	6	5	8	7	6	0.25, 0.36	0.71, 0.82	0.25	0.36	0.71	0.82	4.77515	3.66811	0.305	0.765	4.22163
163	7	6	5	8	7	6	0.25, 0.36	0.71, 0.82	0.25	0.36	0.71	0.82	4.77515	3.66811	0.305	0.765	4.22163
164	7	6	6	8	7	7	0.25, 0.36	0.71, 0.82	0.25	0.36	0.71	0.82	13.5323	4.77515	0.305	0.765	9.15372
165	7	6	6	8	7	7	0.25, 0.36	0.71, 0.82	0.25	0.36	0.71	0.82	13.5323	4.77515	0.305	0.765	9.15372
166	7	6	7	8	7	8	0.25, 0.36	0.71, 0.82	0.25	0.36	0.71	0.82	13.5323	4.77515	0.305	0.765	9.15372
167	7	10	6	8	11	7	0.46, 0.55	0.51, 0.60	0.46	0.55	0.51	0.60	13.4132	4.90786	0.505	0.555	9.16051
168	7	6	6	8	7	7	0.25, 0.36	0.71, 0.82	0.25	0.36	0.71	0.82	13.5323	4.77515	0.305	0.765	9.15372
169	7	6	4	8	7	5	0.25, 0.36	0.71, 0.82	0.25	0.36	0.71	0.82	3.66811	2.26747	0.305	0.765	2.96779
170	7	6	6	8	7	7	0.25, 0.36	0.71, 0.82	0.25	0.36	0.71	0.82	13.5323	4.77515	0.305	0.765	9.15372
171	7	6	6	8	7	7	0.25, 0.36	0.71, 0.82	0.25	0.36	0.71	0.82	13.5323	4.77515	0.305	0.765	9.15372
172	7	6	6	8	7	7	0.25, 0.36	0.71, 0.82	0.25	0.36	0.71	0.82	13.5323	4.77515	0.305	0.765	9.15372
173	7	6	6	8	7	7	0.25, 0.36	0.71, 0.82	0.25	0.36	0.71	0.82	13.5323	4.77515	0.305	0.765	9.15372
174	7	6	4	8	7	5	0.25, 0.36	0.71, 0.82	0.25	0.36	0.71	0.82	3.66811	2.26747	0.305	0.765	2.96779
175	7	6	7	8	7	8	0.25, 0.36	0.71, 0.82	0.25	0.36	0.71	0.82	13.5323	4.77515	0.305	0.765	9.15372
176	7	9	6	8	10	7	0.41, 0.50	0.56, 0.66	0.41	0.50	0.56	0.66	13.4027	4.86017	0.455	0.61	9.13142
177	7	6	5	8	7	6	0.25, 0.36	0.71, 0.82	0.25	0.36	0.71	0.82	4.77515	3.66811	0.305	0.765	4.22163
178	7	6	4	8	7	5	0.25, 0.36	0.71, 0.82	0.25	0.36	0.71	0.82	3.66811	2.26747	0.305	0.765	2.96779
179	7	6	5	8	7	6	0.25, 0.36	0.71, 0.82	0.25	0.36	0.71	0.82	4.77515	3.66811	0.305	0.765	4.22163
180	7	6	5	8	7	6	0.25, 0.36	0.71, 0.82	0.25	0.36	0.71	0.82	4.77515	3.66811	0.305	0.765	4.22163
181	7	6	6	8	7	7	0.25, 0.36	0.71, 0.82	0.25	0.36	0.71	0.82	13.5323	4.77515	0.305	0.765	9.15372
182	7	6	6	8	7	7	0.25, 0.36	0.71, 0.82	0.25	0.36	0.71	0.82	13.5323	4.77515	0.305	0.765	9.15372
183	7	6	5	8	7	6	0.25, 0.36	0.71, 0.82	0.25	0.36	0.71	0.82	4.77515	3.66811	0.305	0.765	4.22163
184	7	6	4	8	7	5	0.25, 0.36	0.71, 0.82	0.25	0.36	0.71	0.82	3.66811	2.26747	0.305	0.765	2.96779
185	7	6	6	8	7	7	0.25, 0.36	0.71, 0.82	0.25	0.36	0.71	0.82	13.5323	4.77515	0.305	0.765	9.15372
186	7	6	4	8	7	5	0.25, 0.36	0.71, 0.82	0.25	0.36	0.71	0.82	3.66811	2.26747	0.305	0.765	2.96779
187	7	6	4	8	7	5	0.25, 0.36	0.71, 0.82	0.25	0.36	0.71	0.82	3.66811	2.26747	0.305	0.765	2.96779
188	7	6	6	8	7	7	0.25, 0.36	0.71, 0.82	0.25	0.36	0.71	0.82	13.5323	4.77515	0.305	0.765	9.15372
189	7	6	4	8	7	5	0.25, 0.36	0.71, 0.82	0.25	0.36	0.71	0.82	3.66811	2.26747	0.305	0.765	2.96779
190	7	6	6	8	7	7	0.25, 0.36	0.71, 0.82	0.25	0.36	0.71	0.82	13.5323	4.77515	0.305	0.765	9.15372
191	7	6	5	8	7	6	0.25, 0.36	0.71, 0.82	0.25	0.36	0.71	0.82	4.77515	3.66811	0.305	0.765	4.22163
192	7	6	6	8	7	7	0.25, 0.36	0.71, 0.82	0.25	0.36	0.71	0.82	13.5323	4.77515	0.305	0.765	9.15372
193	7	6	6	8	7	7	0.25, 0.36	0.71, 0.82	0.25	0.36	0.71	0.82	13.5323	4.77515	0.305	0.765	9.15372
194	7	6	6	8	7	7	0.25, 0.36	0.71, 0.82	0.25	0.36	0.71	0.82	13.5323	4.77515	0.305	0.765	9.15372
195	7	6	4	8	7	5	0.25, 0.36	0.71, 0.82	0.25	0.36	0.71	0.82	3.66811	2.26747	0.305	0.765	2.96779
196	7	6	6	8	7	7	0.25, 0.36	0.71, 0.82	0.25	0.36	0.71	0.82	13.5323	4.77515	0.305	0.765	9.15372
197	7	6	4	8	7	5	0.25, 0.36	0.71, 0.82	0.25	0.36	0.71	0.82	3.66811	2.26747	0.305	0.765	2.96779
198	7	6	5	8	7	6	0.25, 0.36	0.71, 0.82	0.25	0.36	0.71	0.82	4.77515	3.66811	0.305	0.765	4.22163
199	7	6	5	8	7	6	0.25, 0.36	0.71, 0.82	0.25	0.36	0.71	0.82	4.77515	3.66811	0.305	0.765	4.22163
200	7	6	6	8	7	7	0.25, 0.36	0.71, 0.82	0.25	0.36	0.71	0.82	13.5323	4.77515	0.305	0.765	9.15372
201	7	6	4	8	7	5	0.25, 0.36	0.71, 0.82	0.25	0.36	0.71	0.82	3.66811	2.26747	0.305	0.765	2.96779
202	7	6	5	8	7	6	0.25, 0.36	0.71, 0.82	0.25	0.36	0.71	0.82	4.77515	3.66811	0.305	0.765	4.22163
203	7	6	5	8	7	6	0.25, 0.36	0.71, 0.82	0.25	0.36	0.71	0.82	4.77515	3.66811	0.305	0.765	4.22163
204	7	6	6	8	7	7	0.25, 0.36	0.71, 0.82	0.25	0.36	0.71	0.82	13.5323	4.77515	0.305	0.765	9.15372
205	7	6	6	8	7	7	0.25, 0.36	0.71, 0.82	0.25	0.36	0.71	0.82	13.5323	4.77515	0.305	0.765	9.15372
206	7	6	7	8	7	8	0.25, 0.36	0.71, 0.82	0.25	0.36	0.71	0.82	13.5323	4.77515	0.305	0.765	9.15372
207	7	6	6	8	7	7	0.25, 0.36	0.71, 0.82	0.25	0.36	0.71	0.82	13.5323	4.77515	0.305	0.765	9.15372
208	7	6	6	8	7	7	0.25, 0.36	0.71, 0.82	0.25	0.36	0.71	0.82	13.5323	4.77515	0.305	0.765	9.15372
209	7	9	6	8	10	7	0.41, 0.50	0.56, 0.66	0.41	0.50	0.56	0.66	13.4027	4.86017	0.455	0.61	9.13142
210	7	6	6	8	7	7	0.25, 0.36	0.71, 0.82	0.25	0.36	0.71	0.82	13.5323	4.77515	0.305	0.765	9.15372
211	7	6	4	8	7	5	0.25, 0.36	0.71, 0.82	0.25	0.36	0.71	0.82	3.66811	2.26747	0.305	0.765	2.96779
212	7	6	6	8	7	7	0.25, 0.36	0.71, 0.82	0.25	0.36	0.71	0.82	13.5323	4.77515	0.305	0.765	9.15372
213	7	6	4	8	7	5	0.25, 0.36	0.71, 0.82	0.25	0.36	0.71	0.82	3.66811	2.26747	0.305	0.765	2.96779
214	7	6	6	8	7	7	0.25, 0.36	0.71, 0.82	0.25	0.36	0.71	0.82	13.5323	4.77515	0.305	0.765	9.15372
215	7	6	5	8	7	6	0.25, 0.36	0.71, 0.82	0.25	0.36	0.71	0.82	4.77515	3.66811	0.305	0.765	4.22163
216	7	6	5	8	7	6	0.25, 0.36	0.71, 0.82	0.25	0.36	0.71	0.82	4.77515	3.66811	0.305	0.765	4.22163
217	7	6	6	8	7	7	0.25, 0.36	0.71, 0.82	0.25	0.36	0.71	0.82	13.5323	4.77515	0.305	0.765	9.15372
218	7	6	6	8	7	7	0.25, 0.36	0.71, 0.82	0.25	0.36	0.71	0.82	13.5323	4.77515	0.305	0.765	9.15372
219	7	6	6	8	7	7	0.25, 0.36	0.71, 0.82	0.25	0.36	0.71	0.82	13.5323	4.77515	0.305	0.765	9.15372
220	7	6	7	8	7	8	0.25, 0.36	0.71, 0.82	0.25	0.36	0.71	0.82	13.5323	4.77515	0.305	0.765	9.15372
221	7	6	4	8	7	5	0.25, 0.36	0.71, 0.82	0.25	0.36	0.71	0.82	3.66811	2.26747	0.305	0.765	2.96779
222	7	6	5	8	7	6	0.25, 0.36	0.71, 0.82	0.25	0.36	0.71	0.82	4.77515	3.66811	0.305	0.765	4.22163
223	7	6	4	8	7	5	0.25, 0.36	0.71, 0.82	0.25	0.36	0.71	0.82	3.66811	2.26747	0.305	0.765	2.96779
224	7	6	4	8	7	5	0.25, 0.36	0.71, 0.82	0.25	0.36	0.71	0.82	3.66811	2.26747	0.305	0.765	2.96779
225	7	6	6	8	7	7	0.25, 0.36	0.71, 0.82	0.25	0.36	0.71	0.82	13.5323	4.77515	0.305	0.765	9.15372
226	7	6	6	8	7	7	0.25, 0.36	0.71, 0.82	0.25	0.36	0.71	0.82	13.5323	4.77515	0.305	0.765	9.15372
227	7	6	5	8	7	6	0.25, 0.36	0.71, 0.82	0.25	0.36	0.71	0.82	4.77515	3.66811	0.305	0.765	4.22163
228	7	6	6	8	7	7	0.25, 0.36	0.71, 0.82	0.25	0.36	0.71	0.82	13.5323	4.77515	0.305	0.765	9.15372
229	7	6	6	8	7	7	0.25, 0.36	0.71, 0.82	0.25	0.36	0.71	0.82	13.5323	4.77515	0.305	0.765	9.15372
230	7	6	5	8	7	6	0.25, 0.36	0.71, 0.82	0.25	0.36	0.71	0.82	4.77515	3.66811	0.305	0.765	4.22163
231	7	6	4	8	7	5	0.25, 0.36	0.71, 0.82	0.25	0.36	0.71	0.82	3.66811	2.26747	0.305	0.765	2.96779
232	7	6	7	8	7	8	0.25, 0.36	0.71, 0.82	0.25	0.36	0.71	0.82	13.5323	4.77515	0.305	0.765	9.15372
233	7	6	4	8	7	5	0.25, 0.36	0.71, 0.82	0.25	0.36	0.71	0.82	3.66811	2.26747	0.305	0.765	2.96779
234	7	6	6	8	7	7	0.25, 0.36	0.71, 0.82	0.25	0.36	0.71	0.82	13.5323	4.77515	0.305	0.765	9.15372
235	7	6	5	8	7	6	0.25, 0.36	0.71, 0.82	0.25	0.36	0.71	0.82	4.77515	3.66811	0.305	0.765	4.22163
236	7	6	5	8	7	6	0.25, 0.36	0.71, 0.82	0.25	0.36	0.71	0.82	4.77515	3.66811	0.305	0.765	4.22163
237	7	6	7	8	7	8	0.25, 0.36	0.71, 0.82	0.25	0.36	0.71	0.82	13.5323	4.77515	0.305	0.765	9.15372
238	7	6	6	8	7	7	0.25, 0.36	0.71, 0.82	0.25	0.36	0.71	0.82	13.5323	4.77515	0.305	0.765	9.15372
239	7	6	4	8	7	5	0.25, 0.36	0.71, 0.82	0.25	0.36	0.71	0.82	3.66811	2.26747	0.305	0.765	2.96779
240	7	6	6	8	7	7	0.25, 0.36	0.71, 0.82	0.25	0.36	0.71	0.82	13.5323	4.77515	0.305	0.765	9.15372
241	7	6	4	8	7	5	0.25, 0.36	0.71, 0.82	0.25	0.36	0.71	0.82	3.66811	2.26747	0.305	0.765	2.96779
242	7	6	4	8	7	5	0.25, 0.36	0.71, 0.82	0.25	0.36	0.71	0.82	3.66811	2.26747	0.305	0.765	2.96779
243	7	6	5	8	7	6	0.25, 0.36	0.71, 0.82	0.25	0.36	0.71	0.82	4.77515	3.66811	0.305	0.765	4.22163
244	7	6	6	8	7	7	0.25, 0.36	0.71, 0.82	0.25	0.36	0.71	0.82	13.5323	4.77515	0.305	0.765	9.15372
245	7	6	5	8	7	6	0.25, 0.36	0.71, 0.82	0.25	0.36	0.71	0.82	4.77515	3.66811	0.305	0.765	4.22163
246	7	6	5	8	7	6	0.25, 0.36	0.71, 0.82	0.25	0.36	0.71	0.82	4.77515	3.66811	0.305	0.765	4.22163
247	7	6	5	8	7	6	0.25, 0.36	0.71, 0.82	0.25	0.36	0.71	0.82	4.77515	3.66811	0.305	0.765	4.22163
248	7	6	6	8	7	7	0.25, 0.36	0.71, 0.82	0.25	0.36	0.71	0.82	13.5323	4.77515	0.305	0.765	9.15372
249	7	6	5	8	7	6	0.25, 0.36	0.71, 0.82	0.25	0.36	0.71	0.82	4.77515	3.66811	0.305	0.765	4.22163
250	7	6	6	8	7	7	0.25, 0.36	0.71, 0.82	0.25	0.36	0.71	0.82	13.5323	4.77515	0.305	0.765	9.15372
251	7	6	6	8	7	7	0.25, 0.36	0.71, 0.82	0.25	0.36	0.71	0.82	13.5323	4.77515	0.305	0.765	9.15372
252	7	6	6	8	7	7	0.25, 0.36	0.71, 0.82	0.25	0.36	0.71	0.82	13.5323	4.77515	0.305	0.765	9.15372
253	7	6	4	8	7	5	0.25, 0.36	0.71, 0.82	0.25	0.36	0.71	0.82	3.66811	2.26747	0.305	0.765	2.96779
254	7	6	6	8	7	7	0.25, 0.36	0.71, 0.82	0.25	0.36	0.71	0.82	13.5323	4.77515	0.305	0.765	9.15372
255	7	6	4	8	7	5	0.25, 0.36	0.71, 0.82	0.25	0.36	0.71	0.82	3.66811	2.26747	0.305	0.765	2.96779
256	7	6	5	8	7	6	0.25, 0.36	0.71, 0.82	0.25	0.36	0.71	0.82	4.77515	3.66811	0.305	0.765	4.22163
257	7	6	6	8	7	7	0.25, 0.36	0.71, 0.82	0.25	0.36	0.71	0.82	13.5323	4.77515	0.305	0.765	9.15372
258	7	6	4	8	7	5	0.25, 0.36	0.71, 0.82	0.25	0.36	0.71	0.82	3.66811	2.26747	0.305	0.765	2.96779
259	7	6	6	8	7	7	0.25, 0.36	0.71, 0.82	0.25	0.36	0.71	0.82	13.5323	4.77515	0.305	0.765	9.15372
260	7	6	5	8	7	6	0.25, 0.36	0.71, 0.82	0.25	0.36	0.71	0.82	4.77515	3.66811	0.305	0.765	4.22163
261	7	6	4	8	7	5	0.25, 0.36	0.71, 0.82	0.25	0.36	0.71	0.82	3.66811	2.26747	0.305	0.765	2.96779
262	7	6	5	8	7	6	0.25, 0.36	0.71, 0.82	0.25	0.36	0.71	0.82	4.77515	3.66811	0.305	0.765	4.22163
263	7	6	6	8	7	7	0.25, 0.36	0.71, 0.82	0.25	0.36	0.71	0.82	13.5323	4.77515	0.305	0.765	9.15372
264	7	6	6	8	7	7	0.25, 0.36	0.71, 0.82	0.25	0.36	0.71	0.82	13.5323	4.77515	0.305	0.765	9.15372
265	7	6	5	8	7	6	0.25, 0.36	0.71, 0.82	0.25	0.36	0.71	0.82	4.77515	3.66811	0.305	0.765	4.22163
266	7	6	4	8	7	5	0.25, 0.36	0.71, 0.82	0.25	0.36	0.71	0.82	3.66811	2.26747	0.305	0.765	2.96779
267	7	6	7	8	7	8	0.25, 0.36	0.71, 0.82	0.25	0.36	0.71	0.82	13.5323	4.77515	0.305	0.765	9.15372
268	7	6	5	8	7	6	0.25, 0.36	0.71, 0.82	0.25	0.36	0.71	0.82	4.77515	3.66811	0.305	0.765	4.22163
269	7	6	6	8	7	7	0.25, 0.36	0.71, 0.82	0.25	0.36	0.71	0.82	13.5323	4.77515	0.305	0.765	9.15372
270	7	6	5	8	7	6	0.25, 0.36	0.71, 0.82	0.25	0.36	0.71	0.82	4.77515	3.66811	0.305	0.765	4.22163
271	7	6	4	8	7	5	0.25, 0.36	0.71, 0.82	0.25	0.36	0.71	0.82	3.66811	2.26747	0.305	0.765	2.96779
272	7	6	6	8	7	7	0.25, 0.36	0.71, 0.82	0.25	0.36	0.71	0.82	13.5323	4.77515	0.305	0.765	9.15372
273	7	6	4	8	7	5	0.25, 0.36	0.71, 0.82	0.25	0.36	0.71	0.82	3.66811	2.26747	0.305	0.765	2.96779
274	7	6	5	8	7	6	0.25, 0.36	0.71, 0.82	0.25	0.36	0.71	0.82	4.77515	3.66811	0.305	0.765	4.22163
275	7	6	5	8	7	6	0.25, 0.36	0.71, 0.82	0.25	0.36	0.71	0.82	4.77515	3.66811	0.305	0.765	4.22163
276	7	6	6	8	7	7	0.25, 0.36	0.71, 0.82	0.25	0.36	0.71	0.82	13.5323	4.77515	0.305	0.765	9.15372
277	7	6	6	8	7	7	0.25, 0.36	0.71, 0.82	0.25	0.36	0.71	0.82	13.5323	4.77515	0.305	0.765	9.15372
278	7	6	5	8	7	6	0.25, 0.36	0.71, 0.82	0.25	0.36	0.71	0.82	4.77515	3.66811	0.305	0.765	4.22163
279	7	6	6	8	7	7	0.25, 0.36	0.71, 0.82	0.25	0.36	0.71	0.82	13.5323	4.77515	0.305	0.765	9.15372
280	7	6	6	8	7	7	0.25, 0.36	0.71, 0.82	0.25	0.36	0.71	0.82	13.5323	4.77515	0.305	0.765	9.15372
281	7	6	4	8	7	5	0.25, 0.36	0.71, 0.82	0.25	0.36	0.71	0.82	3.66811	2.26747	0.305	0.765	2.96779
282	7	6	4	8	7	5	0.25, 0.36	0.71, 0.82	0.25	0.36	0.71	0.82	3.66811	2.26747	0.305	0.765	2.96779
283	7	6	6	8	7	7	0.25, 0.36	0.71, 0.82	0.25	0.36	0.71	0.82	13.5323	4.77515	0.305	0.765	9.15372
284	7	6	6	8	7	7	0.25, 0.36	0.71, 0.82	0.25	0.36	0.71	0.82	13.5323	4.77515	0.305	0.765	9.15372
285	7	6	5	8	7	6	0.25, 0.36	0.71, 0.82	0.25	0.36	0.71	0.82	4.77515	3.66811	0.305	0.765	4.22163
286	7	6	6	8	7	7	0.25, 0.36	0.71, 0.82	0.25	0.36	0.71	0.82	13.5323	4.77515	0.305	0.765	9.15372
287	7	6	5	8	7	6	0.25, 0.36	0.71, 0.82	0.25	0.36	0.71	0.82	4.77515	3.66811	0.305	0.765	4.22163
288	7	6	4	8	7	5	0.25, 0.36	0.71, 0.82	0.25	0.36	0.71	0.82	3.66811	2.26747	0.305	0.765	2.96779
289	7	6	4	8	7	5	0.25, 0.36	0.71, 0.82	0.25	0.36	0.71	0.82	3.66811	2.26747	0.305	0.765	2.96779
290	7	6	4	8	7	5	0.25, 0.36	0.71, 0.82	0.25	0.36	0.71	0.82	3.66811	2.26747	0.305	0.765	2.96779
291	7	6	7	8	7	8	0.25, 0.36	0.71, 0.82	0.25	0.36	0.71	0.82	13.5323	4.77515	0.305	0.765	9.15372
292	7	6	5	8	7	6	0.25, 0.36	0.71, 0.82	0.25	0.36	0.71	0.82	4.77515	3.66811	0.305	0.765	4.22163
293	7	6	5	8	7	6	0.25, 0.36	0.71, 0.82	0.25	0.36	0.71	0.82	4.77515	3.66811	0.305	0.765	4.22163
294	7	6	6	8	7	7	0.25, 0.36	0.71, 0.82	0.25	0.36	0.71	0.82	13.5323	4.77515	0.305	0.765	9.15372
295	7	6	6	8	7	7	0.25, 0.36	0.71, 0.82	0.25	0.36	0.71	0.82	13.5323	4.77515	0.305	0.765	9.15372
296	7	6	6	8	7	7	0.25, 0.36	0.71, 0.82	0.25	0.36	0.71	0.82	13.5323	4.77515	0.305	0.765	9.15372
297	7	6	6	8	7	7	0.25, 0.36	0.71, 0.82	0.25	0.36	0.71	0.82	13.5323	4.77515	0.305	0.765	9.15372
298	7	6	5	8	7	6	0.25, 0.36	0.71, 0.82	0.25	0.36	0.71	0.82	4.77515	3.66811	0.305	0.765	4.22163
299	7	6	6	8	7	7	0.25, 0.36	0.71, 0.82	0.25	0.36	0.71	0.82	13.5323	4.77515	0.305	0.765	9.15372
300	7	6	4	8	7	5	0.25, 0.36	0.71, 0.82	0.25	0.36	0.71	0.82	3.66811	2.26747	0.305	0.765	2.96779

## Sheet: baseline gemini
Feature	S1	S2	S3	S1-corrected	S2-corrected	S3-corrected	sigma range	alpha range	sigma lower bound	sigma upper bound	alpha lower bound	alpha upper bound	lambda upper bound	lambda lower bound	sigma	alpha	lambda
1	7	7	3	8	8	4	0.32, 0.41	0.66, 0.75	0.32	0.41	0.66	0.75	2.25277	1.78782	0.365	0.705	2.0203
2	10	10	3	11	11	4	0.58, 1.00	0.65, 1.89	0.58	1.00	0.65	1.89	2.30614	1.93802	0.79	1.27	2.12208
3	10	10	3	11	11	4	0.58, 1.00	0.65, 1.89	0.58	1.00	0.65	1.89	2.30614	1.93802	0.79	1.27	2.12208
4	7	7	3	8	8	4	0.32, 0.41	0.66, 0.75	0.32	0.41	0.66	0.75	2.25277	1.78782	0.365	0.705	2.0203
5	10	10	3	11	11	4	0.58, 1.00	0.65, 1.89	0.58	1.00	0.65	1.89	2.30614	1.93802	0.79	1.27	2.12208
6	10	10	3	11	11	4	0.58, 1.00	0.65, 1.89	0.58	1.00	0.65	1.89	2.30614	1.93802	0.79	1.27	2.12208
7	10	10	3	11	11	4	0.58, 1.00	0.65, 1.89	0.58	1.00	0.65	1.89	2.30614	1.93802	0.79	1.27	2.12208
8	10	10	3	11	11	4	0.58, 1.00	0.65, 1.89	0.58	1.00	0.65	1.89	2.30614	1.93802	0.79	1.27	2.12208
9	7	7	3	8	8	4	0.32, 0.41	0.66, 0.75	0.32	0.41	0.66	0.75	2.25277	1.78782	0.365	0.705	2.0203
10	7	7	3	8	8	4	0.32, 0.41	0.66, 0.75	0.32	0.41	0.66	0.75	2.25277	1.78782	0.365	0.705	2.0203
11	7	7	3	8	8	4	0.32, 0.41	0.66, 0.75	0.32	0.41	0.66	0.75	2.25277	1.78782	0.365	0.705	2.0203
12	7	7	3	8	8	4	0.32, 0.41	0.66, 0.75	0.32	0.41	0.66	0.75	2.25277	1.78782	0.365	0.705	2.0203
16	10	10	3	11	11	4	0.58, 1.00	0.65, 1.89	0.58	1.00	0.65	1.89	2.30614	1.93802	0.79	1.27	2.12208
17	10	10	3	11	11	4	0.58, 1.00	0.65, 1.89	0.58	1.00	0.65	1.89	2.30614	1.93802	0.79	1.27	2.12208
18	7	7	3	8	8	4	0.32, 0.41	0.66, 0.75	0.32	0.41	0.66	0.75	2.25277	1.78782	0.365	0.705	2.0203
21	7	7	3	8	8	4	0.32, 0.41	0.66, 0.75	0.32	0.41	0.66	0.75	2.25277	1.78782	0.365	0.705	2.0203
23	10	10	3	11	11	4	0.58, 1.00	0.65, 1.89	0.58	1.00	0.65	1.89	2.30614	1.93802	0.79	1.27	2.12208
25	10	10	3	11	11	4	0.58, 1.00	0.65, 1.89	0.58	1.00	0.65	1.89	2.30614	1.93802	0.79	1.27	2.12208
26	7	7	3	8	8	4	0.32, 0.41	0.66, 0.75	0.32	0.41	0.66	0.75	2.25277	1.78782	0.365	0.705	2.0203
27	10	10	3	11	11	4	0.58, 1.00	0.65, 1.89	0.58	1.00	0.65	1.89	2.30614	1.93802	0.79	1.27	2.12208
28	7	7	3	8	8	4	0.32, 0.41	0.66, 0.75	0.32	0.41	0.66	0.75	2.25277	1.78782	0.365	0.705	2.0203
29	7	7	3	8	8	4	0.32, 0.41	0.66, 0.75	0.32	0.41	0.66	0.75	2.25277	1.78782	0.365	0.705	2.0203
30	7	10	3	8	11	4	0.46, 0.55	0.51, 0.60	0.46	0.55	0.51	0.60	2.23861	1.81233	0.505	0.555	2.02547
31	7	7	3	8	8	4	0.32, 0.41	0.66, 0.75	0.32	0.41	0.66	0.75	2.25277	1.78782	0.365	0.705	2.0203
32	7	7	3	8	8	4	0.32, 0.41	0.66, 0.75	0.32	0.41	0.66	0.75	2.25277	1.78782	0.365	0.705	2.0203
33	7	7	3	8	8	4	0.32, 0.41	0.66, 0.75	0.32	0.41	0.66	0.75	2.25277	1.78782	0.365	0.705	2.0203
34	7	7	3	8	8	4	0.32, 0.41	0.66, 0.75	0.32	0.41	0.66	0.75	2.25277	1.78782	0.365	0.705	2.0203
35	7	7	3	8	8	4	0.32, 0.41	0.66, 0.75	0.32	0.41	0.66	0.75	2.25277	1.78782	0.365	0.705	2.0203
36	7	7	3	8	8	4	0.32, 0.41	0.66, 0.75	0.32	0.41	0.66	0.75	2.25277	1.78782	0.365	0.705	2.0203
37	7	7	3	8	8	4	0.32, 0.41	0.66, 0.75	0.32	0.41	0.66	0.75	2.25277	1.78782	0.365	0.705	2.0203
38	7	7	3	8	8	4	0.32, 0.41	0.66, 0.75	0.32	0.41	0.66	0.75	2.25277	1.78782	0.365	0.705	2.0203
39	8	8	3	9	9	4	0.41, 0.48	0.67, 0.74	0.41	0.48	0.67	0.74	2.24114	1.79918	0.445	0.705	2.02016
40	7	7	3	8	8	4	0.32, 0.41	0.66, 0.75	0.32	0.41	0.66	0.75	2.25277	1.78782	0.365	0.705	2.0203
41	7	7	3	8	8	4	0.32, 0.41	0.66, 0.75	0.32	0.41	0.66	0.75	2.25277	1.78782	0.365	0.705	2.0203
42	7	7	3	8	8	4	0.32, 0.41	0.66, 0.75	0.32	0.41	0.66	0.75	2.25277	1.78782	0.365	0.705	2.0203
43	7	7	3	8	8	4	0.32, 0.41	0.66, 0.75	0.32	0.41	0.66	0.75	2.25277	1.78782	0.365	0.705	2.0203
44	7	7	3	8	8	4	0.32, 0.41	0.66, 0.75	0.32	0.41	0.66	0.75	2.25277	1.78782	0.365	0.705	2.0203
45	7	7	3	8	8	4	0.32, 0.41	0.66, 0.75	0.32	0.41	0.66	0.75	2.25277	1.78782	0.365	0.705	2.0203
47	7	7	3	8	8	4	0.32, 0.41	0.66, 0.75	0.32	0.41	0.66	0.75	2.25277	1.78782	0.365	0.705	2.0203
48	10	10	3	11	11	4	0.58, 1.00	0.65, 1.89	0.58	1.00	0.65	1.89	2.30614	1.93802	0.79	1.27	2.12208
49	7	7	3	8	8	4	0.32, 0.41	0.66, 0.75	0.32	0.41	0.66	0.75	2.25277	1.78782	0.365	0.705	2.0203
51	7	7	3	8	8	4	0.32, 0.41	0.66, 0.75	0.32	0.41	0.66	0.75	2.25277	1.78782	0.365	0.705	2.0203
52	7	7	3	8	8	4	0.32, 0.41	0.66, 0.75	0.32	0.41	0.66	0.75	2.25277	1.78782	0.365	0.705	2.0203
53	10	10	3	11	11	4	0.58, 1.00	0.65, 1.89	0.58	1.00	0.65	1.89	2.30614	1.93802	0.79	1.27	2.12208
54	7	7	3	8	8	4	0.32, 0.41	0.66, 0.75	0.32	0.41	0.66	0.75	2.25277	1.78782	0.365	0.705	2.0203
55	10	10	3	11	11	4	0.58, 1.00	0.65, 1.89	0.58	1.00	0.65	1.89	2.30614	1.93802	0.79	1.27	2.12208
56	10	10	3	11	11	4	0.58, 1.00	0.65, 1.89	0.58	1.00	0.65	1.89	2.30614	1.93802	0.79	1.27	2.12208
57	7	7	3	8	8	4	0.32, 0.41	0.66, 0.75	0.32	0.41	0.66	0.75	2.25277	1.78782	0.365	0.705	2.0203
58	7	7	3	8	8	4	0.32, 0.41	0.66, 0.75	0.32	0.41	0.66	0.75	2.25277	1.78782	0.365	0.705	2.0203
59	7	7	3	8	8	4	0.32, 0.41	0.66, 0.75	0.32	0.41	0.66	0.75	2.25277	1.78782	0.365	0.705	2.0203
60	7	7	3	8	8	4	0.32, 0.41	0.66, 0.75	0.32	0.41	0.66	0.75	2.25277	1.78782	0.365	0.705	2.0203
61	7	7	3	8	8	4	0.32, 0.41	0.66, 0.75	0.32	0.41	0.66	0.75	2.25277	1.78782	0.365	0.705	2.0203
62	6	6	3	7	7	4	0.19, 0.31	0.65, 0.76	0.19	0.31	0.65	0.76	2.2853	1.78287	0.25	0.705	2.03409
63	7	7	3	8	8	4	0.32, 0.41	0.66, 0.75	0.32	0.41	0.66	0.75	2.25277	1.78782	0.365	0.705	2.0203
65	7	7	3	8	8	4	0.32, 0.41	0.66, 0.75	0.32	0.41	0.66	0.75	2.25277	1.78782	0.365	0.705	2.0203
67	7	7	3	8	8	4	0.32, 0.41	0.66, 0.75	0.32	0.41	0.66	0.75	2.25277	1.78782	0.365	0.705	2.0203
68	7	7	3	8	8	4	0.32, 0.41	0.66, 0.75	0.32	0.41	0.66	0.75	2.25277	1.78782	0.365	0.705	2.0203
69	7	7	3	8	8	4	0.32, 0.41	0.66, 0.75	0.32	0.41	0.66	0.75	2.25277	1.78782	0.365	0.705	2.0203
71	7	7	3	8	8	4	0.32, 0.41	0.66, 0.75	0.32	0.41	0.66	0.75	2.25277	1.78782	0.365	0.705	2.0203
72	7	7	3	8	8	4	0.32, 0.41	0.66, 0.75	0.32	0.41	0.66	0.75	2.25277	1.78782	0.365	0.705	2.0203
73	7	7	3	8	8	4	0.32, 0.41	0.66, 0.75	0.32	0.41	0.66	0.75	2.25277	1.78782	0.365	0.705	2.0203
74	10	10	3	11	11	4	0.58, 1.00	0.65, 1.89	0.58	1.00	0.65	1.89	2.30614	1.93802	0.79	1.27	2.12208
75	7	7	3	8	8	4	0.32, 0.41	0.66, 0.75	0.32	0.41	0.66	0.75	2.25277	1.78782	0.365	0.705	2.0203
76	7	7	3	8	8	4	0.32, 0.41	0.66, 0.75	0.32	0.41	0.66	0.75	2.25277	1.78782	0.365	0.705	2.0203
77	7	7	3	8	8	4	0.32, 0.41	0.66, 0.75	0.32	0.41	0.66	0.75	2.25277	1.78782	0.365	0.705	2.0203
79	7	7	3	8	8	4	0.32, 0.41	0.66, 0.75	0.32	0.41	0.66	0.75	2.25277	1.78782	0.365	0.705	2.0203
80	7	7	3	8	8	4	0.32, 0.41	0.66, 0.75	0.32	0.41	0.66	0.75	2.25277	1.78782	0.365	0.705	2.0203
81	7	7	3	8	8	4	0.32, 0.41	0.66, 0.75	0.32	0.41	0.66	0.75	2.25277	1.78782	0.365	0.705	2.0203
82	7	7	3	8	8	4	0.32, 0.41	0.66, 0.75	0.32	0.41	0.66	0.75	2.25277	1.78782	0.365	0.705	2.0203
84	7	7	3	8	8	4	0.32, 0.41	0.66, 0.75	0.32	0.41	0.66	0.75	2.25277	1.78782	0.365	0.705	2.0203
85	7	7	3	8	8	4	0.32, 0.41	0.66, 0.75	0.32	0.41	0.66	0.75	2.25277	1.78782	0.365	0.705	2.0203
86	5	5	3	6	6	4	0.10, 0.19	0.65, 0.74	0.10	0.19	0.65	0.74	2.3306	1.789	0.145	0.695	2.0598
87	7	7	3	8	8	4	0.32, 0.41	0.66, 0.75	0.32	0.41	0.66	0.75	2.25277	1.78782	0.365	0.705	2.0203
88	7	7	3	8	8	4	0.32, 0.41	0.66, 0.75	0.32	0.41	0.66	0.75	2.25277	1.78782	0.365	0.705	2.0203
89	10	10	3	11	11	4	0.58, 1.00	0.65, 1.89	0.58	1.00	0.65	1.89	2.30614	1.93802	0.79	1.27	2.12208
90	7	7	3	8	8	4	0.32, 0.41	0.66, 0.75	0.32	0.41	0.66	0.75	2.25277	1.78782	0.365	0.705	2.0203
91	7	7	3	8	8	4	0.32, 0.41	0.66, 0.75	0.32	0.41	0.66	0.75	2.25277	1.78782	0.365	0.705	2.0203
93	7	7	3	8	8	4	0.32, 0.41	0.66, 0.75	0.32	0.41	0.66	0.75	2.25277	1.78782	0.365	0.705	2.0203
95	7	7	3	8	8	4	0.32, 0.41	0.66, 0.75	0.32	0.41	0.66	0.75	2.25277	1.78782	0.365	0.705	2.0203
96	7	7	3	8	8	4	0.32, 0.41	0.66, 0.75	0.32	0.41	0.66	0.75	2.25277	1.78782	0.365	0.705	2.0203
97	7	7	3	8	8	4	0.32, 0.41	0.66, 0.75	0.32	0.41	0.66	0.75	2.25277	1.78782	0.365	0.705	2.0203
98	7	7	3	8	8	4	0.32, 0.41	0.66, 0.75	0.32	0.41	0.66	0.75	2.25277	1.78782	0.365	0.705	2.0203
99	7	7	3	8	8	4	0.32, 0.41	0.66, 0.75	0.32	0.41	0.66	0.75	2.25277	1.78782	0.365	0.705	2.0203
100	7	7	3	8	8	4	0.32, 0.41	0.66, 0.75	0.32	0.41	0.66	0.75	2.25277	1.78782	0.365	0.705	2.0203
101	7	7	3	8	8	4	0.32, 0.41	0.66, 0.75	0.32	0.41	0.66	0.75	2.25277	1.78782	0.365	0.705	2.0203
102	7	7	3	8	8	4	0.32, 0.41	0.66, 0.75	0.32	0.41	0.66	0.75	2.25277	1.78782	0.365	0.705	2.0203
103	10	10	3	11	11	4	0.58, 1.00	0.65, 1.89	0.58	1.00	0.65	1.89	2.30614	1.93802	0.79	1.27	2.12208
104	7	7	3	8	8	4	0.32, 0.41	0.66, 0.75	0.32	0.41	0.66	0.75	2.25277	1.78782	0.365	0.705	2.0203
105	7	7	3	8	8	4	0.32, 0.41	0.66, 0.75	0.32	0.41	0.66	0.75	2.25277	1.78782	0.365	0.705	2.0203
106	7	7	3	8	8	4	0.32, 0.41	0.66, 0.75	0.32	0.41	0.66	0.75	2.25277	1.78782	0.365	0.705	2.0203
108	7	7	3	8	8	4	0.32, 0.41	0.66, 0.75	0.32	0.41	0.66	0.75	2.25277	1.78782	0.365	0.705	2.0203
109	7	7	3	8	8	4	0.32, 0.41	0.66, 0.75	0.32	0.41	0.66	0.75	2.25277	1.78782	0.365	0.705	2.0203
110	7	7	3	8	8	4	0.32, 0.41	0.66, 0.75	0.32	0.41	0.66	0.75	2.25277	1.78782	0.365	0.705	2.0203
111	7	7	3	8	8	4	0.32, 0.41	0.66, 0.75	0.32	0.41	0.66	0.75	2.25277	1.78782	0.365	0.705	2.0203
114	7	7	3	8	8	4	0.32, 0.41	0.66, 0.75	0.32	0.41	0.66	0.75	2.25277	1.78782	0.365	0.705	2.0203
115	10	10	3	11	11	4	0.58, 1.00	0.65, 1.89	0.58	1.00	0.65	1.89	2.30614	1.93802	0.79	1.27	2.12208
116	7	7	3	8	8	4	0.32, 0.41	0.66, 0.75	0.32	0.41	0.66	0.75	2.25277	1.78782	0.365	0.705	2.0203
117	7	7	3	8	8	4	0.32, 0.41	0.66, 0.75	0.32	0.41	0.66	0.75	2.25277	1.78782	0.365	0.705	2.0203
118	7	7	3	8	8	4	0.32, 0.41	0.66, 0.75	0.32	0.41	0.66	0.75	2.25277	1.78782	0.365	0.705	2.0203
120	7	7	3	8	8	4	0.32, 0.41	0.66, 0.75	0.32	0.41	0.66	0.75	2.25277	1.78782	0.365	0.705	2.0203
121	10	10	3	11	11	4	0.58, 1.00	0.65, 1.89	0.58	1.00	0.65	1.89	2.30614	1.93802	0.79	1.27	2.12208
122	7	7	3	8	8	4	0.32, 0.41	0.66, 0.75	0.32	0.41	0.66	0.75	2.25277	1.78782	0.365	0.705	2.0203
123	7	7	3	8	8	4	0.32, 0.41	0.66, 0.75	0.32	0.41	0.66	0.75	2.25277	1.78782	0.365	0.705	2.0203
124	7	7	3	8	8	4	0.32, 0.41	0.66, 0.75	0.32	0.41	0.66	0.75	2.25277	1.78782	0.365	0.705	2.0203
126	7	7	3	8	8	4	0.32, 0.41	0.66, 0.75	0.32	0.41	0.66	0.75	2.25277	1.78782	0.365	0.705	2.0203
128	7	7	3	8	8	4	0.32, 0.41	0.66, 0.75	0.32	0.41	0.66	0.75	2.25277	1.78782	0.365	0.705	2.0203
129	7	7	3	8	8	4	0.32, 0.41	0.66, 0.75	0.32	0.41	0.66	0.75	2.25277	1.78782	0.365	0.705	2.0203
134	7	7	3	8	8	4	0.32, 0.41	0.66, 0.75	0.32	0.41	0.66	0.75	2.25277	1.78782	0.365	0.705	2.0203
135	10	10	3	11	11	4	0.58, 1.00	0.65, 1.89	0.58	1.00	0.65	1.89	2.30614	1.93802	0.79	1.27	2.12208
136	10	10	3	11	11	4	0.58, 1.00	0.65, 1.89	0.58	1.00	0.65	1.89	2.30614	1.93802	0.79	1.27	2.12208
137	10	10	3	11	11	4	0.58, 1.00	0.65, 1.89	0.58	1.00	0.65	1.89	2.30614	1.93802	0.79	1.27	2.12208
138	10	10	3	11	11	4	0.58, 1.00	0.65, 1.89	0.58	1.00	0.65	1.89	2.30614	1.93802	0.79	1.27	2.12208
139	7	7	3	8	8	4	0.32, 0.41	0.66, 0.75	0.32	0.41	0.66	0.75	2.25277	1.78782	0.365	0.705	2.0203
140	7	7	3	8	8	4	0.32, 0.41	0.66, 0.75	0.32	0.41	0.66	0.75	2.25277	1.78782	0.365	0.705	2.0203
141	7	7	3	8	8	4	0.32, 0.41	0.66, 0.75	0.32	0.41	0.66	0.75	2.25277	1.78782	0.365	0.705	2.0203
142	7	7	3	8	8	4	0.32, 0.41	0.66, 0.75	0.32	0.41	0.66	0.75	2.25277	1.78782	0.365	0.705	2.0203
143	7	7	3	8	8	4	0.32, 0.41	0.66, 0.75	0.32	0.41	0.66	0.75	2.25277	1.78782	0.365	0.705	2.0203
144	7	7	3	8	8	4	0.32, 0.41	0.66, 0.75	0.32	0.41	0.66	0.75	2.25277	1.78782	0.365	0.705	2.0203
145	7	7	3	8	8	4	0.32, 0.41	0.66, 0.75	0.32	0.41	0.66	0.75	2.25277	1.78782	0.365	0.705	2.0203
147	10	10	3	11	11	4	0.58, 1.00	0.65, 1.89	0.58	1.00	0.65	1.89	2.30614	1.93802	0.79	1.27	2.12208
148	10	10	3	11	11	4	0.58, 1.00	0.65, 1.89	0.58	1.00	0.65	1.89	2.30614	1.93802	0.79	1.27	2.12208
149	7	7	3	8	8	4	0.32, 0.41	0.66, 0.75	0.32	0.41	0.66	0.75	2.25277	1.78782	0.365	0.705	2.0203
150	7	7	3	8	8	4	0.32, 0.41	0.66, 0.75	0.32	0.41	0.66	0.75	2.25277	1.78782	0.365	0.705	2.0203
151	7	13	3	8	14	4	0.61, 0.69	0.34, 0.44	0.61	0.69	0.34	0.44	2.25573	1.86223	0.65	0.39	2.05898
152	7	7	3	8	8	4	0.32, 0.41	0.66, 0.75	0.32	0.41	0.66	0.75	2.25277	1.78782	0.365	0.705	2.0203
153	7	7	3	8	8	4	0.32, 0.41	0.66, 0.75	0.32	0.41	0.66	0.75	2.25277	1.78782	0.365	0.705	2.0203
154	7	7	3	8	8	4	0.32, 0.41	0.66, 0.75	0.32	0.41	0.66	0.75	2.25277	1.78782	0.365	0.705	2.0203
155	7	7	3	8	8	4	0.32, 0.41	0.66, 0.75	0.32	0.41	0.66	0.75	2.25277	1.78782	0.365	0.705	2.0203
156	7	7	3	8	8	4	0.32, 0.41	0.66, 0.75	0.32	0.41	0.66	0.75	2.25277	1.78782	0.365	0.705	2.0203
157	7	7	3	8	8	4	0.32, 0.41	0.66, 0.75	0.32	0.41	0.66	0.75	2.25277	1.78782	0.365	0.705	2.0203
158	7	7	3	8	8	4	0.32, 0.41	0.66, 0.75	0.32	0.41	0.66	0.75	2.25277	1.78782	0.365	0.705	2.0203
159	10	10	3	11	11	4	0.58, 1.00	0.65, 1.89	0.58	1.00	0.65	1.89	2.30614	1.93802	0.79	1.27	2.12208
160	7	7	3	8	8	4	0.32, 0.41	0.66, 0.75	0.32	0.41	0.66	0.75	2.25277	1.78782	0.365	0.705	2.0203
161	7	7	3	8	8	4	0.32, 0.41	0.66, 0.75	0.32	0.41	0.66	0.75	2.25277	1.78782	0.365	0.705	2.0203
162	7	7	3	8	8	4	0.32, 0.41	0.66, 0.75	0.32	0.41	0.66	0.75	2.25277	1.78782	0.365	0.705	2.0203
163	10	10	3	11	11	4	0.58, 1.00	0.65, 1.89	0.58	1.00	0.65	1.89	2.30614	1.93802	0.79	1.27	2.12208
165	7	7	3	8	8	4	0.32, 0.41	0.66, 0.75	0.32	0.41	0.66	0.75	2.25277	1.78782	0.365	0.705	2.0203
166	7	7	3	8	8	4	0.32, 0.41	0.66, 0.75	0.32	0.41	0.66	0.75	2.25277	1.78782	0.365	0.705	2.0203
167	7	7	3	8	8	4	0.32, 0.41	0.66, 0.75	0.32	0.41	0.66	0.75	2.25277	1.78782	0.365	0.705	2.0203
168	10	10	3	11	11	4	0.58, 1.00	0.65, 1.89	0.58	1.00	0.65	1.89	2.30614	1.93802	0.79	1.27	2.12208
169	10	10	3	11	11	4	0.58, 1.00	0.65, 1.89	0.58	1.00	0.65	1.89	2.30614	1.93802	0.79	1.27	2.12208
170	7	7	3	8	8	4	0.32, 0.41	0.66, 0.75	0.32	0.41	0.66	0.75	2.25277	1.78782	0.365	0.705	2.0203
172	7	7	3	8	8	4	0.32, 0.41	0.66, 0.75	0.32	0.41	0.66	0.75	2.25277	1.78782	0.365	0.705	2.0203
173	7	7	3	8	8	4	0.32, 0.41	0.66, 0.75	0.32	0.41	0.66	0.75	2.25277	1.78782	0.365	0.705	2.0203
174	7	7	3	8	8	4	0.32, 0.41	0.66, 0.75	0.32	0.41	0.66	0.75	2.25277	1.78782	0.365	0.705	2.0203
175	7	7	3	8	8	4	0.32, 0.41	0.66, 0.75	0.32	0.41	0.66	0.75	2.25277	1.78782	0.365	0.705	2.0203
176	7	7	3	8	8	4	0.32, 0.41	0.66, 0.75	0.32	0.41	0.66	0.75	2.25277	1.78782	0.365	0.705	2.0203
177	7	7	3	8	8	4	0.32, 0.41	0.66, 0.75	0.32	0.41	0.66	0.75	2.25277	1.78782	0.365	0.705	2.0203
178	7	7	3	8	8	4	0.32, 0.41	0.66, 0.75	0.32	0.41	0.66	0.75	2.25277	1.78782	0.365	0.705	2.0203
180	10	10	3	11	11	4	0.58, 1.00	0.65, 1.89	0.58	1.00	0.65	1.89	2.30614	1.93802	0.79	1.27	2.12208
181	10	10	3	11	11	4	0.58, 1.00	0.65, 1.89	0.58	1.00	0.65	1.89	2.30614	1.93802	0.79	1.27	2.12208
182	7	7	3	8	8	4	0.32, 0.41	0.66, 0.75	0.32	0.41	0.66	0.75	2.25277	1.78782	0.365	0.705	2.0203
183	7	7	3	8	8	4	0.32, 0.41	0.66, 0.75	0.32	0.41	0.66	0.75	2.25277	1.78782	0.365	0.705	2.0203
185	7	7	3	8	8	4	0.32, 0.41	0.66, 0.75	0.32	0.41	0.66	0.75	2.25277	1.78782	0.365	0.705	2.0203
186	7	7	3	8	8	4	0.32, 0.41	0.66, 0.75	0.32	0.41	0.66	0.75	2.25277	1.78782	0.365	0.705	2.0203
189	7	7	3	8	8	4	0.32, 0.41	0.66, 0.75	0.32	0.41	0.66	0.75	2.25277	1.78782	0.365	0.705	2.0203
190	7	7	3	8	8	4	0.32, 0.41	0.66, 0.75	0.32	0.41	0.66	0.75	2.25277	1.78782	0.365	0.705	2.0203
191	10	10	3	11	11	4	0.58, 1.00	0.65, 1.89	0.58	1.00	0.65	1.89	2.30614	1.93802	0.79	1.27	2.12208
192	7	7	3	8	8	4	0.32, 0.41	0.66, 0.75	0.32	0.41	0.66	0.75	2.25277	1.78782	0.365	0.705	2.0203
193	7	7	3	8	8	4	0.32, 0.41	0.66, 0.75	0.32	0.41	0.66	0.75	2.25277	1.78782	0.365	0.705	2.0203
194	10	10	3	11	11	4	0.58, 1.00	0.65, 1.89	0.58	1.00	0.65	1.89	2.30614	1.93802	0.79	1.27	2.12208
195	7	7	3	8	8	4	0.32, 0.41	0.66, 0.75	0.32	0.41	0.66	0.75	2.25277	1.78782	0.365	0.705	2.0203
196	7	7	3	8	8	4	0.32, 0.41	0.66, 0.75	0.32	0.41	0.66	0.75	2.25277	1.78782	0.365	0.705	2.0203
197	7	7	3	8	8	4	0.32, 0.41	0.66, 0.75	0.32	0.41	0.66	0.75	2.25277	1.78782	0.365	0.705	2.0203
198	10	10	3	11	11	4	0.58, 1.00	0.65, 1.89	0.58	1.00	0.65	1.89	2.30614	1.93802	0.79	1.27	2.12208
200	10	10	3	11	11	4	0.58, 1.00	0.65, 1.89	0.58	1.00	0.65	1.89	2.30614	1.93802	0.79	1.27	2.12208
201	7	7	3	8	8	4	0.32, 0.41	0.66, 0.75	0.32	0.41	0.66	0.75	2.25277	1.78782	0.365	0.705	2.0203
202	7	7	3	8	8	4	0.32, 0.41	0.66, 0.75	0.32	0.41	0.66	0.75	2.25277	1.78782	0.365	0.705	2.0203
205	7	7	3	8	8	4	0.32, 0.41	0.66, 0.75	0.32	0.41	0.66	0.75	2.25277	1.78782	0.365	0.705	2.0203
206	7	7	3	8	8	4	0.32, 0.41	0.66, 0.75	0.32	0.41	0.66	0.75	2.25277	1.78782	0.365	0.705	2.0203
207	7	7	3	8	8	4	0.32, 0.41	0.66, 0.75	0.32	0.41	0.66	0.75	2.25277	1.78782	0.365	0.705	2.0203
208	7	7	3	8	8	4	0.32, 0.41	0.66, 0.75	0.32	0.41	0.66	0.75	2.25277	1.78782	0.365	0.705	2.0203
210	7	7	3	8	8	4	0.32, 0.41	0.66, 0.75	0.32	0.41	0.66	0.75	2.25277	1.78782	0.365	0.705	2.0203
211	10	10	3	11	11	4	0.58, 1.00	0.65, 1.89	0.58	1.00	0.65	1.89	2.30614	1.93802	0.79	1.27	2.12208
212	10	10	3	11	11	4	0.58, 1.00	0.65, 1.89	0.58	1.00	0.65	1.89	2.30614	1.93802	0.79	1.27	2.12208
213	10	10	3	11	11	4	0.58, 1.00	0.65, 1.89	0.58	1.00	0.65	1.89	2.30614	1.93802	0.79	1.27	2.12208
214	7	7	3	8	8	4	0.32, 0.41	0.66, 0.75	0.32	0.41	0.66	0.75	2.25277	1.78782	0.365	0.705	2.0203
215	7	7	3	8	8	4	0.32, 0.41	0.66, 0.75	0.32	0.41	0.66	0.75	2.25277	1.78782	0.365	0.705	2.0203
217	7	7	3	8	8	4	0.32, 0.41	0.66, 0.75	0.32	0.41	0.66	0.75	2.25277	1.78782	0.365	0.705	2.0203
218	7	7	3	8	8	4	0.32, 0.41	0.66, 0.75	0.32	0.41	0.66	0.75	2.25277	1.78782	0.365	0.705	2.0203
219	7	7	3	8	8	4	0.32, 0.41	0.66, 0.75	0.32	0.41	0.66	0.75	2.25277	1.78782	0.365	0.705	2.0203
220	7	7	3	8	8	4	0.32, 0.41	0.66, 0.75	0.32	0.41	0.66	0.75	2.25277	1.78782	0.365	0.705	2.0203
221	7	7	3	8	8	4	0.32, 0.41	0.66, 0.75	0.32	0.41	0.66	0.75	2.25277	1.78782	0.365	0.705	2.0203
222	7	7	3	8	8	4	0.32, 0.41	0.66, 0.75	0.32	0.41	0.66	0.75	2.25277	1.78782	0.365	0.705	2.0203
223	10	10	3	11	11	4	0.58, 1.00	0.65, 1.89	0.58	1.00	0.65	1.89	2.30614	1.93802	0.79	1.27	2.12208
224	7	7	3	8	8	4	0.32, 0.41	0.66, 0.75	0.32	0.41	0.66	0.75	2.25277	1.78782	0.365	0.705	2.0203
226	10	10	3	11	11	4	0.58, 1.00	0.65, 1.89	0.58	1.00	0.65	1.89	2.30614	1.93802	0.79	1.27	2.12208
227	7	7	3	8	8	4	0.32, 0.41	0.66, 0.75	0.32	0.41	0.66	0.75	2.25277	1.78782	0.365	0.705	2.0203
228	7	7	3	8	8	4	0.32, 0.41	0.66, 0.75	0.32	0.41	0.66	0.75	2.25277	1.78782	0.365	0.705	2.0203
230	10	10	3	11	11	4	0.58, 1.00	0.65, 1.89	0.58	1.00	0.65	1.89	2.30614	1.93802	0.79	1.27	2.12208
231	7	7	3	8	8	4	0.32, 0.41	0.66, 0.75	0.32	0.41	0.66	0.75	2.25277	1.78782	0.365	0.705	2.0203
232	7	7	3	8	8	4	0.32, 0.41	0.66, 0.75	0.32	0.41	0.66	0.75	2.25277	1.78782	0.365	0.705	2.0203
233	7	7	3	8	8	4	0.32, 0.41	0.66, 0.75	0.32	0.41	0.66	0.75	2.25277	1.78782	0.365	0.705	2.0203
234	7	7	3	8	8	4	0.32, 0.41	0.66, 0.75	0.32	0.41	0.66	0.75	2.25277	1.78782	0.365	0.705	2.0203
235	7	7	3	8	8	4	0.32, 0.41	0.66, 0.75	0.32	0.41	0.66	0.75	2.25277	1.78782	0.365	0.705	2.0203
236	10	10	3	11	11	4	0.58, 1.00	0.65, 1.89	0.58	1.00	0.65	1.89	2.30614	1.93802	0.79	1.27	2.12208
237	7	7	3	8	8	4	0.32, 0.41	0.66, 0.75	0.32	0.41	0.66	0.75	2.25277	1.78782	0.365	0.705	2.0203
238	7	7	3	8	8	4	0.32, 0.41	0.66, 0.75	0.32	0.41	0.66	0.75	2.25277	1.78782	0.365	0.705	2.0203
240	7	7	3	8	8	4	0.32, 0.41	0.66, 0.75	0.32	0.41	0.66	0.75	2.25277	1.78782	0.365	0.705	2.0203
241	10	10	3	11	11	4	0.58, 1.00	0.65, 1.89	0.58	1.00	0.65	1.89	2.30614	1.93802	0.79	1.27	2.12208
242	10	10	3	11	11	4	0.58, 1.00	0.65, 1.89	0.58	1.00	0.65	1.89	2.30614	1.93802	0.79	1.27	2.12208
243	7	7	3	8	8	4	0.32, 0.41	0.66, 0.75	0.32	0.41	0.66	0.75	2.25277	1.78782	0.365	0.705	2.0203
244	7	7	3	8	8	4	0.32, 0.41	0.66, 0.75	0.32	0.41	0.66	0.75	2.25277	1.78782	0.365	0.705	2.0203
245	7	7	3	8	8	4	0.32, 0.41	0.66, 0.75	0.32	0.41	0.66	0.75	2.25277	1.78782	0.365	0.705	2.0203
246	7	7	3	8	8	4	0.32, 0.41	0.66, 0.75	0.32	0.41	0.66	0.75	2.25277	1.78782	0.365	0.705	2.0203
247	7	7	3	8	8	4	0.32, 0.41	0.66, 0.75	0.32	0.41	0.66	0.75	2.25277	1.78782	0.365	0.705	2.0203
248	7	7	3	8	8	4	0.32, 0.41	0.66, 0.75	0.32	0.41	0.66	0.75	2.25277	1.78782	0.365	0.705	2.0203
249	7	7	3	8	8	4	0.32, 0.41	0.66, 0.75	0.32	0.41	0.66	0.75	2.25277	1.78782	0.365	0.705	2.0203
250	7	7	3	8	8	4	0.32, 0.41	0.66, 0.75	0.32	0.41	0.66	0.75	2.25277	1.78782	0.365	0.705	2.0203
251	10	10	3	11	11	4	0.58, 1.00	0.65, 1.89	0.58	1.00	0.65	1.89	2.30614	1.93802	0.79	1.27	2.12208
252	7	7	3	8	8	4	0.32, 0.41	0.66, 0.75	0.32	0.41	0.66	0.75	2.25277	1.78782	0.365	0.705	2.0203
253	7	7	3	8	8	4	0.32, 0.41	0.66, 0.75	0.32	0.41	0.66	0.75	2.25277	1.78782	0.365	0.705	2.0203
254	7	7	3	8	8	4	0.32, 0.41	0.66, 0.75	0.32	0.41	0.66	0.75	2.25277	1.78782	0.365	0.705	2.0203
255	7	7	3	8	8	4	0.32, 0.41	0.66, 0.75	0.32	0.41	0.66	0.75	2.25277	1.78782	0.365	0.705	2.0203
256	7	10	3	8	11	4	0.46, 0.55	0.51, 0.60	0.46	0.55	0.51	0.60	2.23861	1.81233	0.505	0.555	2.02547
257	7	7	3	8	8	4	0.32, 0.41	0.66, 0.75	0.32	0.41	0.66	0.75	2.25277	1.78782	0.365	0.705	2.0203
258	7	7	3	8	8	4	0.32, 0.41	0.66, 0.75	0.32	0.41	0.66	0.75	2.25277	1.78782	0.365	0.705	2.0203
260	7	7	3	8	8	4	0.32, 0.41	0.66, 0.75	0.32	0.41	0.66	0.75	2.25277	1.78782	0.365	0.705	2.0203
262	7	7	3	8	8	4	0.32, 0.41	0.66, 0.75	0.32	0.41	0.66	0.75	2.25277	1.78782	0.365	0.705	2.0203
263	10	10	3	11	11	4	0.58, 1.00	0.65, 1.89	0.58	1.00	0.65	1.89	2.30614	1.93802	0.79	1.27	2.12208
264	10	10	3	11	11	4	0.58, 1.00	0.65, 1.89	0.58	1.00	0.65	1.89	2.30614	1.93802	0.79	1.27	2.12208
266	10	10	3	11	11	4	0.58, 1.00	0.65, 1.89	0.58	1.00	0.65	1.89	2.30614	1.93802	0.79	1.27	2.12208
267	7	7	3	8	8	4	0.32, 0.41	0.66, 0.75	0.32	0.41	0.66	0.75	2.25277	1.78782	0.365	0.705	2.0203
268	7	7	3	8	8	4	0.32, 0.41	0.66, 0.75	0.32	0.41	0.66	0.75	2.25277	1.78782	0.365	0.705	2.0203
269	10	10	3	11	11	4	0.58, 1.00	0.65, 1.89	0.58	1.00	0.65	1.89	2.30614	1.93802	0.79	1.27	2.12208
270	7	7	3	8	8	4	0.32, 0.41	0.66, 0.75	0.32	0.41	0.66	0.75	2.25277	1.78782	0.365	0.705	2.0203
271	7	7	3	8	8	4	0.32, 0.41	0.66, 0.75	0.32	0.41	0.66	0.75	2.25277	1.78782	0.365	0.705	2.0203
272	7	7	3	8	8	4	0.32, 0.41	0.66, 0.75	0.32	0.41	0.66	0.75	2.25277	1.78782	0.365	0.705	2.0203
273	7	7	3	8	8	4	0.32, 0.41	0.66, 0.75	0.32	0.41	0.66	0.75	2.25277	1.78782	0.365	0.705	2.0203
274	7	7	3	8	8	4	0.32, 0.41	0.66, 0.75	0.32	0.41	0.66	0.75	2.25277	1.78782	0.365	0.705	2.0203
276	10	10	3	11	11	4	0.58, 1.00	0.65, 1.89	0.58	1.00	0.65	1.89	2.30614	1.93802	0.79	1.27	2.12208
277	10	10	3	11	11	4	0.58, 1.00	0.65, 1.89	0.58	1.00	0.65	1.89	2.30614	1.93802	0.79	1.27	2.12208
278	7	7	3	8	8	4	0.32, 0.41	0.66, 0.75	0.32	0.41	0.66	0.75	2.25277	1.78782	0.365	0.705	2.0203
279	7	7	3	8	8	4	0.32, 0.41	0.66, 0.75	0.32	0.41	0.66	0.75	2.25277	1.78782	0.365	0.705	2.0203
280	7	7	3	8	8	4	0.32, 0.41	0.66, 0.75	0.32	0.41	0.66	0.75	2.25277	1.78782	0.365	0.705	2.0203
281	7	7	3	8	8	4	0.32, 0.41	0.66, 0.75	0.32	0.41	0.66	0.75	2.25277	1.78782	0.365	0.705	2.0203
282	7	7	3	8	8	4	0.32, 0.41	0.66, 0.75	0.32	0.41	0.66	0.75	2.25277	1.78782	0.365	0.705	2.0203
283	7	7	3	8	8	4	0.32, 0.41	0.66, 0.75	0.32	0.41	0.66	0.75	2.25277	1.78782	0.365	0.705	2.0203
284	7	7	3	8	8	4	0.32, 0.41	0.66, 0.75	0.32	0.41	0.66	0.75	2.25277	1.78782	0.365	0.705	2.0203
285	5	5	3	6	6	4	0.10, 0.19	0.65, 0.74	0.10	0.19	0.65	0.74	2.3306	1.789	0.145	0.695	2.0598
286	7	7	3	8	8	4	0.32, 0.41	0.66, 0.75	0.32	0.41	0.66	0.75	2.25277	1.78782	0.365	0.705	2.0203
287	7	7	3	8	8	4	0.32, 0.41	0.66, 0.75	0.32	0.41	0.66	0.75	2.25277	1.78782	0.365	0.705	2.0203
288	7	7	3	8	8	4	0.32, 0.41	0.66, 0.75	0.32	0.41	0.66	0.75	2.25277	1.78782	0.365	0.705	2.0203
289	10	10	3	11	11	4	0.58, 1.00	0.65, 1.89	0.58	1.00	0.65	1.89	2.30614	1.93802	0.79	1.27	2.12208
290	7	7	3	8	8	4	0.32, 0.41	0.66, 0.75	0.32	0.41	0.66	0.75	2.25277	1.78782	0.365	0.705	2.0203
291	7	7	3	8	8	4	0.32, 0.41	0.66, 0.75	0.32	0.41	0.66	0.75	2.25277	1.78782	0.365	0.705	2.0203
292	10	10	3	11	11	4	0.58, 1.00	0.65, 1.89	0.58	1.00	0.65	1.89	2.30614	1.93802	0.79	1.27	2.12208
294	7	7	3	8	8	4	0.32, 0.41	0.66, 0.75	0.32	0.41	0.66	0.75	2.25277	1.78782	0.365	0.705	2.0203
296	10	10	3	11	11	4	0.58, 1.00	0.65, 1.89	0.58	1.00	0.65	1.89	2.30614	1.93802	0.79	1.27	2.12208
297	7	7	3	8	8	4	0.32, 0.41	0.66, 0.75	0.32	0.41	0.66	0.75	2.25277	1.78782	0.365	0.705	2.0203
298	7	7	3	8	8	4	0.32, 0.41	0.66, 0.75	0.32	0.41	0.66	0.75	2.25277	1.78782	0.365	0.705	2.0203
299	7	7	3	8	8	4	0.32, 0.41	0.66, 0.75	0.32	0.41	0.66	0.75	2.25277	1.78782	0.365	0.705	2.0203
300	7	7	3	8	8	4	0.32, 0.41	0.66, 0.75	0.32	0.41	0.66	0.75	2.25277	1.78782	0.365	0.705	2.0203
13	10	10	4	11	11	5	0.58, 1.00	0.65, 1.89	0.58	1.00	0.65	1.89	4.29988	2.30614	0.79	1.27	3.30301
14	10	10	4	11	11	5	0.58, 1.00	0.65, 1.89	0.58	1.00	0.65	1.89	4.29988	2.30614	0.79	1.27	3.30301
15	10	10	4	11	11	5	0.58, 1.00	0.65, 1.89	0.58	1.00	0.65	1.89	4.29988	2.30614	0.79	1.27	3.30301
19	7	7	4	8	8	5	0.32, 0.41	0.66, 0.75	0.32	0.41	0.66	0.75	3.70343	2.25277	0.365	0.705	2.9781
22	7	7	4	8	8	5	0.32, 0.41	0.66, 0.75	0.32	0.41	0.66	0.75	3.70343	2.25277	0.365	0.705	2.9781
24	10	10	4	11	11	5	0.58, 1.00	0.65, 1.89	0.58	1.00	0.65	1.89	4.29988	2.30614	0.79	1.27	3.30301
46	10	10	4	11	11	5	0.58, 1.00	0.65, 1.89	0.58	1.00	0.65	1.89	4.29988	2.30614	0.79	1.27	3.30301
50	7	7	4	8	8	5	0.32, 0.41	0.66, 0.75	0.32	0.41	0.66	0.75	3.70343	2.25277	0.365	0.705	2.9781
66	10	10	4	11	11	5	0.58, 1.00	0.65, 1.89	0.58	1.00	0.65	1.89	4.29988	2.30614	0.79	1.27	3.30301
83	10	10	4	11	11	5	0.58, 1.00	0.65, 1.89	0.58	1.00	0.65	1.89	4.29988	2.30614	0.79	1.27	3.30301
94	10	10	4	11	11	5	0.58, 1.00	0.65, 1.89	0.58	1.00	0.65	1.89	4.29988	2.30614	0.79	1.27	3.30301
107	7	7	4	8	8	5	0.32, 0.41	0.66, 0.75	0.32	0.41	0.66	0.75	3.70343	2.25277	0.365	0.705	2.9781
112	10	10	4	11	11	5	0.58, 1.00	0.65, 1.89	0.58	1.00	0.65	1.89	4.29988	2.30614	0.79	1.27	3.30301
113	7	7	4	8	8	5	0.32, 0.41	0.66, 0.75	0.32	0.41	0.66	0.75	3.70343	2.25277	0.365	0.705	2.9781
119	10	10	4	11	11	5	0.58, 1.00	0.65, 1.89	0.58	1.00	0.65	1.89	4.29988	2.30614	0.79	1.27	3.30301
125	7	7	4	8	8	5	0.32, 0.41	0.66, 0.75	0.32	0.41	0.66	0.75	3.70343	2.25277	0.365	0.705	2.9781
127	10	10	4	11	11	5	0.58, 1.00	0.65, 1.89	0.58	1.00	0.65	1.89	4.29988	2.30614	0.79	1.27	3.30301
131	7	7	4	8	8	5	0.32, 0.41	0.66, 0.75	0.32	0.41	0.66	0.75	3.70343	2.25277	0.365	0.705	2.9781
164	10	10	4	11	11	5	0.58, 1.00	0.65, 1.89	0.58	1.00	0.65	1.89	4.29988	2.30614	0.79	1.27	3.30301
171	10	10	4	11	11	5	0.58, 1.00	0.65, 1.89	0.58	1.00	0.65	1.89	4.29988	2.30614	0.79	1.27	3.30301
203	10	10	4	11	11	5	0.58, 1.00	0.65, 1.89	0.58	1.00	0.65	1.89	4.29988	2.30614	0.79	1.27	3.30301
225	10	10	4	11	11	5	0.58, 1.00	0.65, 1.89	0.58	1.00	0.65	1.89	4.29988	2.30614	0.79	1.27	3.30301
239	10	10	4	11	11	5	0.58, 1.00	0.65, 1.89	0.58	1.00	0.65	1.89	4.29988	2.30614	0.79	1.27	3.30301
259	7	7	4	8	8	5	0.32, 0.41	0.66, 0.75	0.32	0.41	0.66	0.75	3.70343	2.25277	0.365	0.705	2.9781
275	10	10	4	11	11	5	0.58, 1.00	0.65, 1.89	0.58	1.00	0.65	1.89	4.29988	2.30614	0.79	1.27	3.30301
293	7	7	4	8	8	5	0.32, 0.41	0.66, 0.75	0.32	0.41	0.66	0.75	3.70343	2.25277	0.365	0.705	2.9781
295	7	7	4	8	8	5	0.32, 0.41	0.66, 0.75	0.32	0.41	0.66	0.75	3.70343	2.25277	0.365	0.705	2.9781
20	10	10	5	11	11	6	0.58, 1.00	0.65, 1.89	0.58	1.00	0.65	1.89	5.40274	4.29988	0.79	1.27	4.85131
64	10	10	5	11	11	6	0.58, 1.00	0.65, 1.89	0.58	1.00	0.65	1.89	5.40274	4.29988	0.79	1.27	4.85131
70	10	13	5	11	14	6	0.71, 1.00	0.48, 1.89	0.71	1.00	0.48	1.89	5.57876	4.46	0.855	1.185	5.01938
78	10	10	5	11	11	6	0.58, 1.00	0.65, 1.89	0.58	1.00	0.65	1.89	5.40274	4.29988	0.79	1.27	4.85131
92	10	10	5	11	11	6	0.58, 1.00	0.65, 1.89	0.58	1.00	0.65	1.89	5.40274	4.29988	0.79	1.27	4.85131
130	10	10	5	11	11	6	0.58, 1.00	0.65, 1.89	0.58	1.00	0.65	1.89	5.40274	4.29988	0.79	1.27	4.85131
132	10	10	5	11	11	6	0.58, 1.00	0.65, 1.89	0.58	1.00	0.65	1.89	5.40274	4.29988	0.79	1.27	4.85131
133	10	10	5	11	11	6	0.58, 1.00	0.65, 1.89	0.58	1.00	0.65	1.89	5.40274	4.29988	0.79	1.27	4.85131
146	10	10	5	11	11	6	0.58, 1.00	0.65, 1.89	0.58	1.00	0.65	1.89	5.40274	4.29988	0.79	1.27	4.85131
179	10	10	5	11	11	6	0.58, 1.00	0.65, 1.89	0.58	1.00	0.65	1.89	5.40274	4.29988	0.79	1.27	4.85131
184	10	10	5	11	11	6	0.58, 1.00	0.65, 1.89	0.58	1.00	0.65	1.89	5.40274	4.29988	0.79	1.27	4.85131
187	10	10	5	11	11	6	0.58, 1.00	0.65, 1.89	0.58	1.00	0.65	1.89	5.40274	4.29988	0.79	1.27	4.85131
188	10	10	5	11	11	6	0.58, 1.00	0.65, 1.89	0.58	1.00	0.65	1.89	5.40274	4.29988	0.79	1.27	4.85131
199	10	10	5	11	11	6	0.58, 1.00	0.65, 1.89	0.58	1.00	0.65	1.89	5.40274	4.29988	0.79	1.27	4.85131
204	10	10	5	11	11	6	0.58, 1.00	0.65, 1.89	0.58	1.00	0.65	1.89	5.40274	4.29988	0.79	1.27	4.85131
209	10	10	5	11	11	6	0.58, 1.00	0.65, 1.89	0.58	1.00	0.65	1.89	5.40274	4.29988	0.79	1.27	4.85131
216	10	10	5	11	11	6	0.58, 1.00	0.65, 1.89	0.58	1.00	0.65	1.89	5.40274	4.29988	0.79	1.27	4.85131
229	10	10	5	11	11	6	0.58, 1.00	0.65, 1.89	0.58	1.00	0.65	1.89	5.40274	4.29988	0.79	1.27	4.85131
261	10	10	5	11	11	6	0.58, 1.00	0.65, 1.89	0.58	1.00	0.65	1.89	5.40274	4.29988	0.79	1.27	4.85131
265	10	10	5	11	11	6	0.58, 1.00	0.65, 1.89	0.58	1.00	0.65	1.89	5.40274	4.29988	0.79	1.27	4.85131

## Sheet: feature gpt
Feature	S1	S2	S3	S1-corrected	S2-corrected	S3-corrected	sigma range	alpha range	sigma lower bound	sigma upper bound	alpha lower bound	alpha upper bound	lambda upper bound	lambda lower bound	sigma	alpha	lambda	Age	Gender	Education	Marital Status	Location
1	8	6	3	9	7	4	0.31, 0.39	0.76, 0.86	0.31	0.39	0.76	0.86	1.78644	1.46484	0.35	0.81	1.62564	25 to 34	Female	Below lower secondary	Never married	Rural
2	8	5	3	9	6	4	0.27, 0.34	0.82, 0.89	0.27	0.34	0.82	0.89	1.78364	1.48349	0.305	0.855	1.63357	15 to 24	Female	Upper secondary	Never married	Rural
3	7	11	3	8	12	4	0.51, 0.60	0.45, 0.55	0.51	0.60	0.45	0.55	1.82653	1.38666	0.555	0.5	1.60659	45 to 54	Male	Short-cycle tertiary	Widowed	Urban
4	6	4	3	7	5	4	0.11, 0.21	0.74, 0.84	0.11	0.21	0.74	0.84	1.78754	1.54742	0.16	0.79	1.66748	55 to 64	Female	Below lower secondary	Never married	Urban
5	7	10	1	8	11	2	0.46, 0.55	0.51, 0.60	0.46	0.55	0.51	0.60	1.40473	0.232745	0.505	0.555	0.818735	25 to 34	Male	Short-cycle tertiary	Married	Urban
6	5	2	3	6	3	4	-0.07, 0.05	0.77, 0.87	-0.0	0.05	0.77	0.87	1.80728	1.61238	0.025	0.82	1.70983	15 to 24	Female	Bachelor	Never married	Urban
7	7	14	3	8	15	4	#N/A	#N/A	#N/A	#N/A	#N/A	#N/A	#N/A	#N/A	#N/A	#N/A	#N/A	Over 65	Female	Graduate	Never married	Urban
8	5	3	1	6	4	2	-0.00, 0.10	0.73, 0.82	-0.0	0.10	0.73	0.82	1.59994	0.358493	0.05	0.775	0.979216	Over 65	Male	Short-cycle tertiary	Widowed	Rural
9	7	3	1	8	4	2	0.12, 0.22	0.84, 0.94	0.12	0.22	0.84	0.94	1.54282	0.321157	0.17	0.89	0.931987	25 to 34	Male	Lower secondary	Divorced	Rural
10	7	5	3	8	6	4	0.22, 0.30	0.77, 0.85	0.22	0.30	0.77	0.85	1.7828	1.5027	0.26	0.81	1.64275	45 to 54	Male	Lower secondary	Divorced	Urban
11	7	5	3	8	6	4	0.22, 0.30	0.77, 0.85	0.22	0.30	0.77	0.85	1.7828	1.5027	0.26	0.81	1.64275	15 to 24	Female	Upper secondary	Divorced	Urban
12	8	7	3	9	8	4	0.36, 0.44	0.71, 0.80	0.36	0.44	0.71	0.80	1.79195	1.44476	0.4	0.755	1.61836	25 to 34	Female	Short-cycle tertiary	Divorced	Rural
13	7	4	3	8	5	4	0.17, 0.26	0.80, 0.89	0.17	0.26	0.80	0.89	1.78383	1.52247	0.215	0.845	1.65315	35 to 44	Male	Below lower secondary	Divorced	Rural
14	7	6	3	8	7	4	0.25, 0.36	0.71, 0.82	0.25	0.36	0.71	0.82	1.78364	1.48349	0.305	0.765	1.63357	45 to 54	Male	Short-cycle tertiary	Never married	Rural
15	7	5	3	8	6	4	0.22, 0.30	0.77, 0.85	0.22	0.30	0.77	0.85	1.7828	1.5027	0.26	0.81	1.64275	15 to 24	Female	Graduate	Married	Urban
16	7	3	1	8	4	2	0.12, 0.22	0.84, 0.94	0.12	0.22	0.84	0.94	1.54282	0.321157	0.17	0.89	0.931987	45 to 54	Male	Graduate	Never married	Rural
17	6	4	3	7	5	4	0.11, 0.21	0.74, 0.84	0.11	0.21	0.74	0.84	1.78754	1.54742	0.16	0.79	1.66748	55 to 64	Female	Lower secondary	Never married	Urban
18	7	4	3	8	5	4	0.17, 0.26	0.80, 0.89	0.17	0.26	0.80	0.89	1.78383	1.52247	0.215	0.845	1.65315	35 to 44	Male	Below lower secondary	Divorced	Urban
19	6	0	3	7	1	4	#N/A	#N/A	#N/A	#N/A	#N/A	#N/A	#N/A	#N/A	#N/A	#N/A	#N/A	35 to 44	Female	Upper secondary	Married	Rural
20	7	4	3	8	5	4	0.17, 0.26	0.80, 0.89	0.17	0.26	0.80	0.89	1.78383	1.52247	0.215	0.845	1.65315	35 to 44	Female	Lower secondary	Married	Rural
21	7	3	3	8	4	4	0.12, 0.22	0.84, 0.94	0.12	0.22	0.84	0.94	1.78667	1.54282	0.17	0.89	1.66474	45 to 54	Male	Below lower secondary	Divorced	Rural
22	8	6	3	9	7	4	0.31, 0.39	0.76, 0.86	0.31	0.39	0.76	0.86	1.78644	1.46484	0.35	0.81	1.62564	15 to 24	Female	Below lower secondary	Widowed	Urban
23	7	4	3	8	5	4	0.17, 0.26	0.80, 0.89	0.17	0.26	0.80	0.89	1.78383	1.52247	0.215	0.845	1.65315	35 to 44	Female	Below lower secondary	Married	Urban
24	7	5	1	8	6	2	0.22, 0.30	0.77, 0.85	0.22	0.30	0.77	0.85	1.5027	0.29519	0.26	0.81	0.898945	55 to 64	Female	Short-cycle tertiary	Widowed	Rural
25	8	3	3	9	4	4	0.18, 0.26	0.90, 0.98	0.18	0.26	0.90	0.98	1.78363	1.52025	0.22	0.94	1.65194	45 to 54	Male	Bachelor	Widowed	Rural
26	7	4	1	8	5	2	0.17, 0.26	0.80, 0.89	0.17	0.26	0.80	0.89	1.52247	0.307961	0.215	0.845	0.915217	55 to 64	Female	Upper secondary	Widowed	Urban
27	7	4	3	8	5	4	0.17, 0.26	0.80, 0.89	0.17	0.26	0.80	0.89	1.78383	1.52247	0.215	0.845	1.65315	55 to 64	Male	Bachelor	Divorced	Rural
28	9	4	3	10	5	4	0.27, 1.00	0.75, 1.89	0.27	1.00	0.75	1.89	1.8558	1.35904	0.635	1.32	1.60742	15 to 24	Male	Bachelor	Never married	Rural
29	7	4	3	8	5	4	0.17, 0.26	0.80, 0.89	0.17	0.26	0.80	0.89	1.78383	1.52247	0.215	0.845	1.65315	35 to 44	Male	Graduate	Widowed	Urban
30	10	5	1	11	6	2	0.37, 0.44	0.93, 1.00	0.37	0.44	0.93	1.00	1.44279	0.256831	0.405	0.965	0.849808	35 to 44	Male	Bachelor	Divorced	Rural
31	10	7	3	11	8	4	0.46, 1.00	0.75, 1.89	0.46	1.00	0.75	1.89	1.90193	1.32826	0.73	1.32	1.6151	45 to 54	Female	Short-cycle tertiary	Divorced	Urban
32	9	4	3	10	5	4	0.27, 1.00	0.75, 1.89	0.27	1.00	0.75	1.89	1.8558	1.35904	0.635	1.32	1.60742	55 to 64	Female	Lower secondary	Widowed	Rural
33	7	3	3	8	4	4	0.12, 0.22	0.84, 0.94	0.12	0.22	0.84	0.94	1.78667	1.54282	0.17	0.89	1.66474	35 to 44	Male	Bachelor	Divorced	Rural
34	8	4	3	9	5	4	0.23, 0.30	0.86, 0.93	0.23	0.30	0.86	0.93	1.7828	1.50054	0.265	0.895	1.64167	45 to 54	Male	Short-cycle tertiary	Widowed	Urban
35	7	3	1	8	4	2	0.12, 0.22	0.84, 0.94	0.12	0.22	0.84	0.94	1.54282	0.321157	0.17	0.89	0.931987	25 to 34	Female	Upper secondary	Married	Rural
36	7	6	3	8	7	4	0.25, 0.36	0.71, 0.82	0.25	0.36	0.71	0.82	1.78364	1.48349	0.305	0.765	1.63357	55 to 64	Male	Lower secondary	Divorced	Rural
37	7	4	3	8	5	4	0.17, 0.26	0.80, 0.89	0.17	0.26	0.80	0.89	1.78383	1.52247	0.215	0.845	1.65315	25 to 34	Male	Short-cycle tertiary	Never married	Urban
38	7	3	3	8	4	4	0.12, 0.22	0.84, 0.94	0.12	0.22	0.84	0.94	1.78667	1.54282	0.17	0.89	1.66474	55 to 64	Female	Below lower secondary	Widowed	Rural
39	7	4	3	8	5	4	0.17, 0.26	0.80, 0.89	0.17	0.26	0.80	0.89	1.78383	1.52247	0.215	0.845	1.65315	45 to 54	Female	Below lower secondary	Married	Rural
40	7	10	3	8	11	4	0.46, 0.55	0.51, 0.60	0.46	0.55	0.51	0.60	1.81233	1.40473	0.505	0.555	1.60853	35 to 44	Female	Lower secondary	Divorced	Urban
41	7	4	3	8	5	4	0.17, 0.26	0.80, 0.89	0.17	0.26	0.80	0.89	1.78383	1.52247	0.215	0.845	1.65315	15 to 24	Female	Short-cycle tertiary	Widowed	Rural
42	7	2	3	8	3	4	0.06, 0.17	0.89, 0.99	0.06	0.17	0.89	0.99	1.79249	1.56847	0.115	0.94	1.68048	25 to 34	Female	Graduate	Married	Urban
43	7	3	1	8	4	2	0.12, 0.22	0.84, 0.94	0.12	0.22	0.84	0.94	1.54282	0.321157	0.17	0.89	0.931987	Over 65	Female	Graduate	Divorced	Urban
44	4	7	1	5	8	2	0.15, 0.26	0.49, 0.59	0.15	0.26	0.49	0.59	1.52694	0.310857	0.205	0.54	0.9189	15 to 24	Male	Below lower secondary	Never married	Urban
45	6	7	3	7	8	4	0.26, 0.36	0.60, 0.70	0.26	0.36	0.60	0.70	1.78385	1.48139	0.31	0.65	1.63262	25 to 34	Female	Upper secondary	Never married	Rural
46	9	5	3	10	6	4	0.31, 0.40	0.87, 0.96	0.31	0.40	0.87	0.96	1.78688	1.4628	0.355	0.915	1.62484	45 to 54	Female	Graduate	Never married	Urban
47	8	3	3	9	4	4	0.18, 0.26	0.90, 0.98	0.18	0.26	0.90	0.98	1.78363	1.52025	0.22	0.94	1.65194	45 to 54	Male	Upper secondary	Never married	Rural
48	7	10	3	8	11	4	0.46, 0.55	0.51, 0.60	0.46	0.55	0.51	0.60	1.81233	1.40473	0.505	0.555	1.60853	55 to 64	Male	Upper secondary	Divorced	Rural
49	10	6	3	11	7	4	0.40, 1.00	0.75, 1.89	0.40	1.00	0.75	1.89	1.88595	1.33775	0.7	1.32	1.61185	Over 65	Female	Graduate	Widowed	Rural
50	8	7	3	9	8	4	0.36, 0.44	0.71, 0.80	0.36	0.44	0.71	0.80	1.79195	1.44476	0.4	0.755	1.61836	35 to 44	Female	Upper secondary	Divorced	Rural
51	7	3	3	8	4	4	0.12, 0.22	0.84, 0.94	0.12	0.22	0.84	0.94	1.78667	1.54282	0.17	0.89	1.66474	45 to 54	Female	Below lower secondary	Never married	Rural
52	7	4	3	8	5	4	0.17, 0.26	0.80, 0.89	0.17	0.26	0.80	0.89	1.78383	1.52247	0.215	0.845	1.65315	45 to 54	Female	Graduate	Divorced	Rural
53	7	4	1	8	5	2	0.17, 0.26	0.80, 0.89	0.17	0.26	0.80	0.89	1.52247	0.307961	0.215	0.845	0.915217	15 to 24	Female	Lower secondary	Never married	Urban
54	7	5	3	8	6	4	0.22, 0.30	0.77, 0.85	0.22	0.30	0.77	0.85	1.7828	1.5027	0.26	0.81	1.64275	45 to 54	Male	Bachelor	Never married	Urban
55	7	2	1	8	3	2	0.06, 0.17	0.89, 0.99	0.06	0.17	0.89	0.99	1.56847	0.337876	0.115	0.94	0.953175	35 to 44	Female	Short-cycle tertiary	Widowed	Urban
56	7	3	1	8	4	2	0.12, 0.22	0.84, 0.94	0.12	0.22	0.84	0.94	1.54282	0.321157	0.17	0.89	0.931987	35 to 44	Female	Graduate	Married	Urban
57	7	4	3	8	5	4	0.17, 0.26	0.80, 0.89	0.17	0.26	0.80	0.89	1.78383	1.52247	0.215	0.845	1.65315	15 to 24	Female	Upper secondary	Divorced	Urban
58	7	6	3	8	7	4	0.25, 0.36	0.71, 0.82	0.25	0.36	0.71	0.82	1.78364	1.48349	0.305	0.765	1.63357	Over 65	Male	Lower secondary	Widowed	Rural
59	7	3	1	8	4	2	0.12, 0.22	0.84, 0.94	0.12	0.22	0.84	0.94	1.54282	0.321157	0.17	0.89	0.931987	45 to 54	Female	Short-cycle tertiary	Married	Rural
60	6	4	1	7	5	2	0.11, 0.21	0.74, 0.84	0.11	0.21	0.74	0.84	1.54742	0.324148	0.16	0.79	0.935783	35 to 44	Male	Bachelor	Never married	Urban
61	7	4	3	8	5	4	0.17, 0.26	0.80, 0.89	0.17	0.26	0.80	0.89	1.78383	1.52247	0.215	0.845	1.65315	45 to 54	Female	Lower secondary	Never married	Urban
62	7	3	3	8	4	4	0.12, 0.22	0.84, 0.94	0.12	0.22	0.84	0.94	1.78667	1.54282	0.17	0.89	1.66474	45 to 54	Male	Graduate	Divorced	Urban
63	8	5	3	9	6	4	0.27, 0.34	0.82, 0.89	0.27	0.34	0.82	0.89	1.78364	1.48349	0.305	0.855	1.63357	15 to 24	Male	Lower secondary	Widowed	Rural
64	7	5	3	8	6	4	0.22, 0.30	0.77, 0.85	0.22	0.30	0.77	0.85	1.7828	1.5027	0.26	0.81	1.64275	35 to 44	Male	Lower secondary	Divorced	Rural
65	6	4	1	7	5	2	0.11, 0.21	0.74, 0.84	0.11	0.21	0.74	0.84	1.54742	0.324148	0.16	0.79	0.935783	55 to 64	Female	Bachelor	Married	Rural
66	7	4	2	8	5	3	0.17, 0.26	0.80, 0.89	0.17	0.26	0.80	0.89	1.78383	1.52247	0.215	0.845	1.65315	25 to 34	Female	Below lower secondary	Never married	Rural
67	5	3	3	6	4	4	-0.00, 0.10	0.73, 0.82	-0.0	0.10	0.73	0.82	1.80253	1.59994	0.05	0.775	1.70124	Over 65	Male	Lower secondary	Married	Rural
68	7	4	1	8	5	2	0.17, 0.26	0.80, 0.89	0.17	0.26	0.80	0.89	1.52247	0.307961	0.215	0.845	0.915217	35 to 44	Female	Bachelor	Married	Urban
69	7	4	3	8	5	4	0.17, 0.26	0.80, 0.89	0.17	0.26	0.80	0.89	1.78383	1.52247	0.215	0.845	1.65315	25 to 34	Female	Below lower secondary	Divorced	Rural
70	7	4	3	8	5	4	0.17, 0.26	0.80, 0.89	0.17	0.26	0.80	0.89	1.78383	1.52247	0.215	0.845	1.65315	45 to 54	Male	Graduate	Widowed	Rural
71	8	7	1	9	8	2	0.36, 0.44	0.71, 0.80	0.36	0.44	0.71	0.80	1.44476	0.258085	0.4	0.755	0.851421	Over 65	Male	Short-cycle tertiary	Widowed	Urban
72	7	4	3	8	5	4	0.17, 0.26	0.80, 0.89	0.17	0.26	0.80	0.89	1.78383	1.52247	0.215	0.845	1.65315	45 to 54	Female	Short-cycle tertiary	Widowed	Rural
73	7	4	3	8	5	4	0.17, 0.26	0.80, 0.89	0.17	0.26	0.80	0.89	1.78383	1.52247	0.215	0.845	1.65315	35 to 44	Male	Upper secondary	Married	Rural
74	8	7	3	9	8	4	0.36, 0.44	0.71, 0.80	0.36	0.44	0.71	0.80	1.79195	1.44476	0.4	0.755	1.61836	35 to 44	Female	Graduate	Married	Urban
75	7	7	3	8	8	4	0.32, 0.41	0.66, 0.75	0.32	0.41	0.66	0.75	1.78782	1.45875	0.365	0.705	1.62328	25 to 34	Male	Lower secondary	Never married	Rural
76	6	3	1	7	4	2	0.06, 0.16	0.78, 0.88	0.06	0.16	0.78	0.88	1.57085	0.339429	0.11	0.83	0.95514	45 to 54	Female	Short-cycle tertiary	Married	Rural
77	5	7	3	6	8	4	0.21, 0.31	0.55, 0.64	0.21	0.31	0.55	0.64	1.7828	1.5027	0.26	0.595	1.64275	Over 65	Male	Short-cycle tertiary	Widowed	Rural
78	7	5	3	8	6	4	0.22, 0.30	0.77, 0.85	0.22	0.30	0.77	0.85	1.7828	1.5027	0.26	0.81	1.64275	Over 65	Female	Graduate	Married	Urban
79	7	3	4	8	4	5	0.12, 0.22	0.84, 0.94	0.12	0.22	0.84	0.94	3.62272	2.31849	0.17	0.89	2.9706	55 to 64	Male	Lower secondary	Widowed	Rural
80	7	4	3	8	5	4	0.17, 0.26	0.80, 0.89	0.17	0.26	0.80	0.89	1.78383	1.52247	0.215	0.845	1.65315	45 to 54	Male	Short-cycle tertiary	Divorced	Urban
81	6	3	1	7	4	2	0.06, 0.16	0.78, 0.88	0.06	0.16	0.78	0.88	1.57085	0.339429	0.11	0.83	0.95514	45 to 54	Female	Bachelor	Divorced	Urban
82	7	4	3	8	5	4	0.17, 0.26	0.80, 0.89	0.17	0.26	0.80	0.89	1.78383	1.52247	0.215	0.845	1.65315	35 to 44	Male	Graduate	Married	Rural
83	7	5	3	8	6	4	0.22, 0.30	0.77, 0.85	0.22	0.30	0.77	0.85	1.7828	1.5027	0.26	0.81	1.64275	15 to 24	Female	Lower secondary	Never married	Urban
84	7	4	3	8	5	4	0.17, 0.26	0.80, 0.89	0.17	0.26	0.80	0.89	1.78383	1.52247	0.215	0.845	1.65315	45 to 54	Male	Lower secondary	Never married	Rural
85	7	4	3	8	5	4	0.17, 0.26	0.80, 0.89	0.17	0.26	0.80	0.89	1.78383	1.52247	0.215	0.845	1.65315	Over 65	Female	Lower secondary	Never married	Rural
86	7	4	3	8	5	4	0.17, 0.26	0.80, 0.89	0.17	0.26	0.80	0.89	1.78383	1.52247	0.215	0.845	1.65315	15 to 24	Female	Graduate	Married	Urban
87	7	6	1	8	7	2	0.25, 0.36	0.71, 0.82	0.25	0.36	0.71	0.82	1.48349	0.282836	0.305	0.765	0.883164	15 to 24	Male	Below lower secondary	Never married	Rural
88	9	3	1	10	4	2	0.22, 1.00	0.75, 1.89	0.22	1.00	0.75	1.89	1.3675	0.20942	0.61	1.32	0.788462	25 to 34	Male	Bachelor	Never married	Rural
89	7	3	4	8	4	5	0.12, 0.22	0.84, 0.94	0.12	0.22	0.84	0.94	3.62272	2.31849	0.17	0.89	2.9706	35 to 44	Male	Graduate	Never married	Rural
90	7	3	1	8	4	2	0.12, 0.22	0.84, 0.94	0.12	0.22	0.84	0.94	1.54282	0.321157	0.17	0.89	0.931987	Over 65	Female	Short-cycle tertiary	Widowed	Urban
91	7	4	3	8	5	4	0.17, 0.26	0.80, 0.89	0.17	0.26	0.80	0.89	1.78383	1.52247	0.215	0.845	1.65315	Over 65	Female	Upper secondary	Divorced	Rural
92	7	4	3	8	5	4	0.17, 0.26	0.80, 0.89	0.17	0.26	0.80	0.89	1.78383	1.52247	0.215	0.845	1.65315	45 to 54	Male	Short-cycle tertiary	Married	Urban
93	7	5	3	8	6	4	0.22, 0.30	0.77, 0.85	0.22	0.30	0.77	0.85	1.7828	1.5027	0.26	0.81	1.64275	Over 65	Male	Graduate	Never married	Rural
94	7	4	3	8	5	4	0.17, 0.26	0.80, 0.89	0.17	0.26	0.80	0.89	1.78383	1.52247	0.215	0.845	1.65315	35 to 44	Female	Bachelor	Divorced	Rural
95	9	6	1	10	7	2	0.34, 1.00	0.75, 1.89	0.34	1.00	0.75	1.89	1.34745	0.196954	0.67	1.32	0.772204	55 to 64	Female	Below lower secondary	Married	Urban
96	6	4	3	7	5	4	0.11, 0.21	0.74, 0.84	0.11	0.21	0.74	0.84	1.78754	1.54742	0.16	0.79	1.66748	55 to 64	Male	Below lower secondary	Married	Urban
97	7	3	1	8	4	2	0.12, 0.22	0.84, 0.94	0.12	0.22	0.84	0.94	1.54282	0.321157	0.17	0.89	0.931987	25 to 34	Male	Short-cycle tertiary	Married	Rural
98	7	4	3	8	5	4	0.17, 0.26	0.80, 0.89	0.17	0.26	0.80	0.89	1.78383	1.52247	0.215	0.845	1.65315	55 to 64	Male	Upper secondary	Never married	Urban
99	6	3	1	7	4	2	0.06, 0.16	0.78, 0.88	0.06	0.16	0.78	0.88	1.57085	0.339429	0.11	0.83	0.95514	55 to 64	Female	Below lower secondary	Widowed	Rural
100	7	6	3	8	7	4	0.25, 0.36	0.71, 0.82	0.25	0.36	0.71	0.82	1.78364	1.48349	0.305	0.765	1.63357	25 to 34	Female	Graduate	Never married	Urban
101	5	3	1	6	4	2	-0.00, 0.10	0.73, 0.82	-0.0	0.10	0.73	0.82	1.59994	0.358493	0.05	0.775	0.979216	Over 65	Female	Short-cycle tertiary	Married	Rural
102	7	4	1	8	5	2	0.17, 0.26	0.80, 0.89	0.17	0.26	0.80	0.89	1.52247	0.307961	0.215	0.845	0.915217	15 to 24	Female	Bachelor	Never married	Rural
103	7	4	1	8	5	2	0.17, 0.26	0.80, 0.89	0.17	0.26	0.80	0.89	1.52247	0.307961	0.215	0.845	0.915217	35 to 44	Female	Graduate	Married	Urban
104	7	4	3	8	5	4	0.17, 0.26	0.80, 0.89	0.17	0.26	0.80	0.89	1.78383	1.52247	0.215	0.845	1.65315	55 to 64	Female	Below lower secondary	Widowed	Urban
105	7	5	3	8	6	4	0.22, 0.30	0.77, 0.85	0.22	0.30	0.77	0.85	1.7828	1.5027	0.26	0.81	1.64275	55 to 64	Male	Short-cycle tertiary	Divorced	Rural
106	9	5	3	10	6	4	0.31, 0.40	0.87, 0.96	0.31	0.40	0.87	0.96	1.78688	1.4628	0.355	0.915	1.62484	55 to 64	Female	Lower secondary	Never married	Urban
107	6	3	1	7	4	2	0.06, 0.16	0.78, 0.88	0.06	0.16	0.78	0.88	1.57085	0.339429	0.11	0.83	0.95514	25 to 34	Female	Short-cycle tertiary	Never married	Rural
108	7	4	3	8	5	4	0.17, 0.26	0.80, 0.89	0.17	0.26	0.80	0.89	1.78383	1.52247	0.215	0.845	1.65315	45 to 54	Female	Graduate	Divorced	Rural
109	6	4	1	7	5	2	0.11, 0.21	0.74, 0.84	0.11	0.21	0.74	0.84	1.54742	0.324148	0.16	0.79	0.935783	35 to 44	Female	Upper secondary	Married	Rural
110	7	3	3	8	4	4	0.12, 0.22	0.84, 0.94	0.12	0.22	0.84	0.94	1.78667	1.54282	0.17	0.89	1.66474	25 to 34	Female	Short-cycle tertiary	Never married	Urban
111	7	5	3	8	6	4	0.22, 0.30	0.77, 0.85	0.22	0.30	0.77	0.85	1.7828	1.5027	0.26	0.81	1.64275	25 to 34	Male	Short-cycle tertiary	Widowed	Urban
112	7	6	3	8	7	4	0.25, 0.36	0.71, 0.82	0.25	0.36	0.71	0.82	1.78364	1.48349	0.305	0.765	1.63357	55 to 64	Male	Bachelor	Divorced	Urban
113	6	3	1	7	4	2	0.06, 0.16	0.78, 0.88	0.06	0.16	0.78	0.88	1.57085	0.339429	0.11	0.83	0.95514	Over 65	Female	Below lower secondary	Married	Rural
114	7	4	3	8	5	4	0.17, 0.26	0.80, 0.89	0.17	0.26	0.80	0.89	1.78383	1.52247	0.215	0.845	1.65315	55 to 64	Male	Bachelor	Never married	Rural
115	7	4	3	8	5	4	0.17, 0.26	0.80, 0.89	0.17	0.26	0.80	0.89	1.78383	1.52247	0.215	0.845	1.65315	55 to 64	Female	Lower secondary	Divorced	Rural
116	7	3	3	8	4	4	0.12, 0.22	0.84, 0.94	0.12	0.22	0.84	0.94	1.78667	1.54282	0.17	0.89	1.66474	15 to 24	Male	Upper secondary	Married	Urban
117	7	3	4	8	4	5	0.12, 0.22	0.84, 0.94	0.12	0.22	0.84	0.94	3.62272	2.31849	0.17	0.89	2.9706	25 to 34	Male	Bachelor	Divorced	Urban
118	4	3	1	5	4	2	-0.07, 0.04	0.67, 0.76	-0.0	0.04	0.67	0.76	1.61489	0.368328	0.02	0.715	0.991607	15 to 24	Male	Short-cycle tertiary	Never married	Urban
119	7	3	3	8	4	4	0.12, 0.22	0.84, 0.94	0.12	0.22	0.84	0.94	1.78667	1.54282	0.17	0.89	1.66474	55 to 64	Male	Below lower secondary	Divorced	Rural
120	9	7	3	10	8	4	0.40, 1.00	0.75, 1.89	0.40	1.00	0.75	1.89	1.88595	1.33775	0.7	1.32	1.61185	45 to 54	Female	Graduate	Widowed	Urban
121	7	3	1	8	4	2	0.12, 0.22	0.84, 0.94	0.12	0.22	0.84	0.94	1.54282	0.321157	0.17	0.89	0.931987	Over 65	Female	Short-cycle tertiary	Widowed	Urban
122	7	4	3	8	5	4	0.17, 0.26	0.80, 0.89	0.17	0.26	0.80	0.89	1.78383	1.52247	0.215	0.845	1.65315	25 to 34	Male	Bachelor	Married	Urban
123	8	6	3	9	7	4	0.31, 0.39	0.76, 0.86	0.31	0.39	0.76	0.86	1.78644	1.46484	0.35	0.81	1.62564	35 to 44	Male	Lower secondary	Married	Rural
124	9	7	1	10	8	2	0.40, 1.00	0.75, 1.89	0.40	1.00	0.75	1.89	1.33775	0.190949	0.7	1.32	0.76435	Over 65	Male	Below lower secondary	Never married	Urban
125	7	4	3	8	5	4	0.17, 0.26	0.80, 0.89	0.17	0.26	0.80	0.89	1.78383	1.52247	0.215	0.845	1.65315	45 to 54	Female	Lower secondary	Married	Rural
126	7	4	3	8	5	4	0.17, 0.26	0.80, 0.89	0.17	0.26	0.80	0.89	1.78383	1.52247	0.215	0.845	1.65315	55 to 64	Female	Short-cycle tertiary	Divorced	Rural
127	7	4	3	8	5	4	0.17, 0.26	0.80, 0.89	0.17	0.26	0.80	0.89	1.78383	1.52247	0.215	0.845	1.65315	Over 65	Female	Short-cycle tertiary	Married	Urban
128	7	5	1	8	6	2	0.22, 0.30	0.77, 0.85	0.22	0.30	0.77	0.85	1.5027	0.29519	0.26	0.81	0.898945	55 to 64	Female	Lower secondary	Never married	Urban
129	7	5	3	8	6	4	0.22, 0.30	0.77, 0.85	0.22	0.30	0.77	0.85	1.7828	1.5027	0.26	0.81	1.64275	15 to 24	Male	Below lower secondary	Never married	Rural
130	7	6	3	8	7	4	0.25, 0.36	0.71, 0.82	0.25	0.36	0.71	0.82	1.78364	1.48349	0.305	0.765	1.63357	45 to 54	Female	Lower secondary	Never married	Urban
131	7	13	1	8	14	2	0.61, 0.69	0.34, 0.44	0.61	0.69	0.34	0.44	1.35404	0.201042	0.65	0.39	0.777541	35 to 44	Male	Upper secondary	Divorced	Urban
132	7	4	3	8	5	4	0.17, 0.26	0.80, 0.89	0.17	0.26	0.80	0.89	1.78383	1.52247	0.215	0.845	1.65315	15 to 24	Female	Bachelor	Never married	Rural
133	7	5	4	8	6	5	0.22, 0.30	0.77, 0.85	0.22	0.30	0.77	0.85	3.64793	2.28175	0.26	0.81	2.96484	15 to 24	Female	Short-cycle tertiary	Married	Urban
134	5	7	1	6	8	2	0.21, 0.31	0.55, 0.64	0.21	0.31	0.55	0.64	1.5027	0.29519	0.26	0.595	0.898945	25 to 34	Female	Upper secondary	Divorced	Urban
135	6	3	1	7	4	2	0.06, 0.16	0.78, 0.88	0.06	0.16	0.78	0.88	1.57085	0.339429	0.11	0.83	0.95514	55 to 64	Female	Below lower secondary	Never married	Rural
136	7	2	3	8	3	4	0.06, 0.17	0.89, 0.99	0.06	0.17	0.89	0.99	1.79249	1.56847	0.115	0.94	1.68048	35 to 44	Female	Lower secondary	Never married	Urban
137	7	4	3	8	5	4	0.17, 0.26	0.80, 0.89	0.17	0.26	0.80	0.89	1.78383	1.52247	0.215	0.845	1.65315	25 to 34	Female	Short-cycle tertiary	Never married	Urban
138	6	4	3	7	5	4	0.11, 0.21	0.74, 0.84	0.11	0.21	0.74	0.84	1.78754	1.54742	0.16	0.79	1.66748	45 to 54	Female	Upper secondary	Married	Urban
139	9	6	3	10	7	4	0.34, 1.00	0.75, 1.89	0.34	1.00	0.75	1.89	1.87129	1.34745	0.67	1.32	1.60937	15 to 24	Male	Short-cycle tertiary	Never married	Rural
140	7	4	3	8	5	4	0.17, 0.26	0.80, 0.89	0.17	0.26	0.80	0.89	1.78383	1.52247	0.215	0.845	1.65315	55 to 64	Male	Upper secondary	Never married	Rural
141	9	5	3	10	6	4	0.31, 0.40	0.87, 0.96	0.31	0.40	0.87	0.96	1.78688	1.4628	0.355	0.915	1.62484	45 to 54	Male	Below lower secondary	Divorced	Urban
142	7	4	3	8	5	4	0.17, 0.26	0.80, 0.89	0.17	0.26	0.80	0.89	1.78383	1.52247	0.215	0.845	1.65315	45 to 54	Female	Below lower secondary	Widowed	Urban
143	6	5	1	7	6	2	0.16, 0.24	0.71, 0.80	0.16	0.24	0.71	0.80	1.52919	0.312312	0.2	0.755	0.920751	Over 65	Female	Upper secondary	Divorced	Rural
144	7	2	3	8	3	4	0.06, 0.17	0.89, 0.99	0.06	0.17	0.89	0.99	1.79249	1.56847	0.115	0.94	1.68048	15 to 24	Female	Bachelor	Widowed	Urban
145	8	4	3	9	5	4	0.23, 0.30	0.86, 0.93	0.23	0.30	0.86	0.93	1.7828	1.50054	0.265	0.895	1.64167	45 to 54	Male	Graduate	Divorced	Urban
146	7	5	3	8	6	4	0.22, 0.30	0.77, 0.85	0.22	0.30	0.77	0.85	1.7828	1.5027	0.26	0.81	1.64275	45 to 54	Male	Below lower secondary	Married	Rural
147	7	4	3	8	5	4	0.17, 0.26	0.80, 0.89	0.17	0.26	0.80	0.89	1.78383	1.52247	0.215	0.845	1.65315	Over 65	Female	Upper secondary	Never married	Rural
148	7	4	1	8	5	2	0.17, 0.26	0.80, 0.89	0.17	0.26	0.80	0.89	1.52247	0.307961	0.215	0.845	0.915217	55 to 64	Male	Graduate	Divorced	Urban
149	7	0	1	8	1	2	#N/A	#N/A	#N/A	#N/A	#N/A	#N/A	#N/A	#N/A	#N/A	#N/A	#N/A	25 to 34	Female	Short-cycle tertiary	Never married	Rural
150	7	3	1	8	4	2	0.12, 0.22	0.84, 0.94	0.12	0.22	0.84	0.94	1.54282	0.321157	0.17	0.89	0.931987	25 to 34	Male	Short-cycle tertiary	Divorced	Rural
151	8	5	3	9	6	4	0.27, 0.34	0.82, 0.89	0.27	0.34	0.82	0.89	1.78364	1.48349	0.305	0.855	1.63357	Over 65	Female	Short-cycle tertiary	Widowed	Rural
152	6	4	1	7	5	2	0.11, 0.21	0.74, 0.84	0.11	0.21	0.74	0.84	1.54742	0.324148	0.16	0.79	0.935783	55 to 64	Female	Lower secondary	Divorced	Urban
153	7	4	1	8	5	2	0.17, 0.26	0.80, 0.89	0.17	0.26	0.80	0.89	1.52247	0.307961	0.215	0.845	0.915217	45 to 54	Female	Bachelor	Divorced	Rural
154	7	3	3	8	4	4	0.12, 0.22	0.84, 0.94	0.12	0.22	0.84	0.94	1.78667	1.54282	0.17	0.89	1.66474	35 to 44	Female	Short-cycle tertiary	Divorced	Urban
155	7	4	3	8	5	4	0.17, 0.26	0.80, 0.89	0.17	0.26	0.80	0.89	1.78383	1.52247	0.215	0.845	1.65315	55 to 64	Female	Short-cycle tertiary	Widowed	Urban
156	8	6	3	9	7	4	0.31, 0.39	0.76, 0.86	0.31	0.39	0.76	0.86	1.78644	1.46484	0.35	0.81	1.62564	Over 65	Female	Bachelor	Never married	Rural
157	9	3	3	10	4	4	0.22, 1.00	0.75, 1.89	0.22	1.00	0.75	1.89	1.84575	1.3675	0.61	1.32	1.60663	35 to 44	Male	Lower secondary	Married	Rural
158	6	4	3	7	5	4	0.11, 0.21	0.74, 0.84	0.11	0.21	0.74	0.84	1.78754	1.54742	0.16	0.79	1.66748	45 to 54	Male	Short-cycle tertiary	Divorced	Urban
159	7	5	1	8	6	2	0.22, 0.30	0.77, 0.85	0.22	0.30	0.77	0.85	1.5027	0.29519	0.26	0.81	0.898945	35 to 44	Male	Graduate	Never married	Rural
160	8	5	1	9	6	2	0.27, 0.34	0.82, 0.89	0.27	0.34	0.82	0.89	1.48349	0.282836	0.305	0.855	0.883164	25 to 34	Male	Graduate	Widowed	Rural
161	7	3	3	8	4	4	0.12, 0.22	0.84, 0.94	0.12	0.22	0.84	0.94	1.78667	1.54282	0.17	0.89	1.66474	Over 65	Male	Graduate	Widowed	Rural
162	7	4	1	8	5	2	0.17, 0.26	0.80, 0.89	0.17	0.26	0.80	0.89	1.52247	0.307961	0.215	0.845	0.915217	45 to 54	Female	Bachelor	Divorced	Urban
163	8	5	3	9	6	4	0.27, 0.34	0.82, 0.89	0.27	0.34	0.82	0.89	1.78364	1.48349	0.305	0.855	1.63357	55 to 64	Male	Upper secondary	Widowed	Urban
164	6	4	3	7	5	4	0.11, 0.21	0.74, 0.84	0.11	0.21	0.74	0.84	1.78754	1.54742	0.16	0.79	1.66748	55 to 64	Male	Upper secondary	Married	Rural
165	6	7	3	7	8	4	0.26, 0.36	0.60, 0.70	0.26	0.36	0.60	0.70	1.78385	1.48139	0.31	0.65	1.63262	Over 65	Male	Bachelor	Married	Urban
166	7	3	3	8	4	4	0.12, 0.22	0.84, 0.94	0.12	0.22	0.84	0.94	1.78667	1.54282	0.17	0.89	1.66474	55 to 64	Male	Upper secondary	Widowed	Rural
167	6	3	3	7	4	4	0.06, 0.16	0.78, 0.88	0.06	0.16	0.78	0.88	1.79314	1.57085	0.11	0.83	1.68199	15 to 24	Male	Below lower secondary	Married	Rural
168	7	3	1	8	4	2	0.12, 0.22	0.84, 0.94	0.12	0.22	0.84	0.94	1.54282	0.321157	0.17	0.89	0.931987	35 to 44	Female	Graduate	Married	Rural
169	6	0	3	7	1	4	#N/A	#N/A	#N/A	#N/A	#N/A	#N/A	#N/A	#N/A	#N/A	#N/A	#N/A	35 to 44	Male	Graduate	Widowed	Rural
170	7	4	3	8	5	4	0.17, 0.26	0.80, 0.89	0.17	0.26	0.80	0.89	1.78383	1.52247	0.215	0.845	1.65315	25 to 34	Male	Bachelor	Married	Rural
171	8	6	3	9	7	4	0.31, 0.39	0.76, 0.86	0.31	0.39	0.76	0.86	1.78644	1.46484	0.35	0.81	1.62564	45 to 54	Female	Below lower secondary	Divorced	Urban
172	7	3	1	8	4	2	0.12, 0.22	0.84, 0.94	0.12	0.22	0.84	0.94	1.54282	0.321157	0.17	0.89	0.931987	Over 65	Female	Lower secondary	Married	Urban
173	7	3	3	8	4	4	0.12, 0.22	0.84, 0.94	0.12	0.22	0.84	0.94	1.78667	1.54282	0.17	0.89	1.66474	Over 65	Male	Lower secondary	Divorced	Urban
174	9	6	3	10	7	4	0.34, 1.00	0.75, 1.89	0.34	1.00	0.75	1.89	1.87129	1.34745	0.67	1.32	1.60937	55 to 64	Male	Bachelor	Widowed	Urban
175	7	3	1	8	4	2	0.12, 0.22	0.84, 0.94	0.12	0.22	0.84	0.94	1.54282	0.321157	0.17	0.89	0.931987	Over 65	Male	Lower secondary	Married	Rural
176	7	3	1	8	4	2	0.12, 0.22	0.84, 0.94	0.12	0.22	0.84	0.94	1.54282	0.321157	0.17	0.89	0.931987	45 to 54	Female	Bachelor	Never married	Urban
177	7	4	3	8	5	4	0.17, 0.26	0.80, 0.89	0.17	0.26	0.80	0.89	1.78383	1.52247	0.215	0.845	1.65315	35 to 44	Male	Graduate	Never married	Urban
178	5	6	3	6	7	4	0.14, 0.25	0.60, 0.70	0.14	0.25	0.60	0.70	1.78488	1.53144	0.195	0.65	1.65816	15 to 24	Female	Short-cycle tertiary	Widowed	Urban
179	7	5	3	8	6	4	0.22, 0.30	0.77, 0.85	0.22	0.30	0.77	0.85	1.7828	1.5027	0.26	0.81	1.64275	15 to 24	Male	Graduate	Widowed	Rural
180	6	4	3	7	5	4	0.11, 0.21	0.74, 0.84	0.11	0.21	0.74	0.84	1.78754	1.54742	0.16	0.79	1.66748	45 to 54	Male	Graduate	Widowed	Rural
181	7	1	3	8	2	4	-0.01, 0.12	0.94, 1.05	-0.0	0.12	0.94	1.05	1.80077	1.59502	0.06	0.995	1.69789	45 to 54	Male	Below lower secondary	Divorced	Rural
182	7	4	3	8	5	4	0.17, 0.26	0.80, 0.89	0.17	0.26	0.80	0.89	1.78383	1.52247	0.215	0.845	1.65315	45 to 54	Female	Bachelor	Never married	Rural
183	6	3	3	7	4	4	0.06, 0.16	0.78, 0.88	0.06	0.16	0.78	0.88	1.79314	1.57085	0.11	0.83	1.68199	35 to 44	Male	Lower secondary	Married	Urban
184	4	10	3	5	11	4	0.32, 0.42	0.34, 0.45	0.32	0.42	0.34	0.45	1.78834	1.45673	0.37	0.395	1.62253	55 to 64	Female	Upper secondary	Married	Rural
185	7	3	1	8	4	2	0.12, 0.22	0.84, 0.94	0.12	0.22	0.84	0.94	1.54282	0.321157	0.17	0.89	0.931987	Over 65	Female	Lower secondary	Never married	Urban
186	8	7	3	9	8	4	0.36, 0.44	0.71, 0.80	0.36	0.44	0.71	0.80	1.79195	1.44476	0.4	0.755	1.61836	15 to 24	Female	Lower secondary	Widowed	Rural
187	9	3	1	10	4	2	0.22, 1.00	0.75, 1.89	0.22	1.00	0.75	1.89	1.3675	0.20942	0.61	1.32	0.788462	35 to 44	Male	Below lower secondary	Married	Urban
188	7	4	3	8	5	4	0.17, 0.26	0.80, 0.89	0.17	0.26	0.80	0.89	1.78383	1.52247	0.215	0.845	1.65315	35 to 44	Male	Bachelor	Married	Urban
189	7	6	3	8	7	4	0.25, 0.36	0.71, 0.82	0.25	0.36	0.71	0.82	1.78364	1.48349	0.305	0.765	1.63357	15 to 24	Female	Bachelor	Widowed	Rural
190	7	5	1	8	6	2	0.22, 0.30	0.77, 0.85	0.22	0.30	0.77	0.85	1.5027	0.29519	0.26	0.81	0.898945	45 to 54	Male	Graduate	Divorced	Urban
191	8	7	3	9	8	4	0.36, 0.44	0.71, 0.80	0.36	0.44	0.71	0.80	1.79195	1.44476	0.4	0.755	1.61836	55 to 64	Male	Upper secondary	Widowed	Urban
192	6	4	3	7	5	4	0.11, 0.21	0.74, 0.84	0.11	0.21	0.74	0.84	1.78754	1.54742	0.16	0.79	1.66748	25 to 34	Female	Lower secondary	Widowed	Urban
193	7	4	3	8	5	4	0.17, 0.26	0.80, 0.89	0.17	0.26	0.80	0.89	1.78383	1.52247	0.215	0.845	1.65315	35 to 44	Female	Short-cycle tertiary	Never married	Urban
194	10	3	1	11	4	2	0.29, 1.00	0.75, 1.89	0.29	1.00	0.75	1.89	1.3557	0.202074	0.645	1.32	0.778888	55 to 64	Male	Short-cycle tertiary	Married	Urban
195	7	3	3	8	4	4	0.12, 0.22	0.84, 0.94	0.12	0.22	0.84	0.94	1.78667	1.54282	0.17	0.89	1.66474	Over 65	Male	Lower secondary	Never married	Urban
196	7	4	3	8	5	4	0.17, 0.26	0.80, 0.89	0.17	0.26	0.80	0.89	1.78383	1.52247	0.215	0.845	1.65315	55 to 64	Female	Lower secondary	Never married	Urban
197	7	1	3	8	2	4	-0.01, 0.12	0.94, 1.05	-0.0	0.12	0.94	1.05	1.80077	1.59502	0.06	0.995	1.69789	35 to 44	Male	Graduate	Married	Urban
198	7	3	1	8	4	2	0.12, 0.22	0.84, 0.94	0.12	0.22	0.84	0.94	1.54282	0.321157	0.17	0.89	0.931987	Over 65	Male	Bachelor	Married	Rural
199	8	6	3	9	7	4	0.31, 0.39	0.76, 0.86	0.31	0.39	0.76	0.86	1.78644	1.46484	0.35	0.81	1.62564	Over 65	Male	Below lower secondary	Widowed	Urban
200	8	5	3	9	6	4	0.27, 0.34	0.82, 0.89	0.27	0.34	0.82	0.89	1.78364	1.48349	0.305	0.855	1.63357	55 to 64	Male	Lower secondary	Widowed	Urban
201	7	5	3	8	6	4	0.22, 0.30	0.77, 0.85	0.22	0.30	0.77	0.85	1.7828	1.5027	0.26	0.81	1.64275	45 to 54	Female	Lower secondary	Divorced	Rural
202	6	0	3	7	1	4	#N/A	#N/A	#N/A	#N/A	#N/A	#N/A	#N/A	#N/A	#N/A	#N/A	#N/A	25 to 34	Male	Below lower secondary	Widowed	Urban
203	7	4	3	8	5	4	0.17, 0.26	0.80, 0.89	0.17	0.26	0.80	0.89	1.78383	1.52247	0.215	0.845	1.65315	25 to 34	Female	Lower secondary	Married	Rural
204	7	3	1	8	4	2	0.12, 0.22	0.84, 0.94	0.12	0.22	0.84	0.94	1.54282	0.321157	0.17	0.89	0.931987	25 to 34	Female	Bachelor	Married	Rural
205	7	6	1	8	7	2	0.25, 0.36	0.71, 0.82	0.25	0.36	0.71	0.82	1.48349	0.282836	0.305	0.765	0.883164	Over 65	Male	Bachelor	Widowed	Urban
206	7	5	3	8	6	4	0.22, 0.30	0.77, 0.85	0.22	0.30	0.77	0.85	1.7828	1.5027	0.26	0.81	1.64275	25 to 34	Female	Lower secondary	Never married	Urban
207	9	6	3	10	7	4	0.34, 1.00	0.75, 1.89	0.34	1.00	0.75	1.89	1.87129	1.34745	0.67	1.32	1.60937	15 to 24	Female	Lower secondary	Widowed	Urban
208	7	4	1	8	5	2	0.17, 0.26	0.80, 0.89	0.17	0.26	0.80	0.89	1.52247	0.307961	0.215	0.845	0.915217	45 to 54	Male	Graduate	Married	Rural
209	7	5	3	8	6	4	0.22, 0.30	0.77, 0.85	0.22	0.30	0.77	0.85	1.7828	1.5027	0.26	0.81	1.64275	15 to 24	Male	Graduate	Widowed	Urban
210	7	5	3	8	6	4	0.22, 0.30	0.77, 0.85	0.22	0.30	0.77	0.85	1.7828	1.5027	0.26	0.81	1.64275	Over 65	Female	Short-cycle tertiary	Never married	Rural
211	7	6	3	8	7	4	0.25, 0.36	0.71, 0.82	0.25	0.36	0.71	0.82	1.78364	1.48349	0.305	0.765	1.63357	55 to 64	Male	Short-cycle tertiary	Divorced	Rural
212	7	4	3	8	5	4	0.17, 0.26	0.80, 0.89	0.17	0.26	0.80	0.89	1.78383	1.52247	0.215	0.845	1.65315	55 to 64	Female	Graduate	Divorced	Urban
213	7	4	3	8	5	4	0.17, 0.26	0.80, 0.89	0.17	0.26	0.80	0.89	1.78383	1.52247	0.215	0.845	1.65315	45 to 54	Male	Upper secondary	Divorced	Rural
214	7	5	3	8	6	4	0.22, 0.30	0.77, 0.85	0.22	0.30	0.77	0.85	1.7828	1.5027	0.26	0.81	1.64275	35 to 44	Female	Graduate	Divorced	Rural
215	7	0	3	8	1	4	#N/A	#N/A	#N/A	#N/A	#N/A	#N/A	#N/A	#N/A	#N/A	#N/A	#N/A	45 to 54	Female	Below lower secondary	Divorced	Urban
216	7	5	1	8	6	2	0.22, 0.30	0.77, 0.85	0.22	0.30	0.77	0.85	1.5027	0.29519	0.26	0.81	0.898945	45 to 54	Female	Short-cycle tertiary	Married	Urban
217	7	4	1	8	5	2	0.17, 0.26	0.80, 0.89	0.17	0.26	0.80	0.89	1.52247	0.307961	0.215	0.845	0.915217	15 to 24	Male	Lower secondary	Never married	Rural
218	7	4	3	8	5	4	0.17, 0.26	0.80, 0.89	0.17	0.26	0.80	0.89	1.78383	1.52247	0.215	0.845	1.65315	Over 65	Male	Short-cycle tertiary	Divorced	Urban
219	7	4	3	8	5	4	0.17, 0.26	0.80, 0.89	0.17	0.26	0.80	0.89	1.78383	1.52247	0.215	0.845	1.65315	15 to 24	Female	Lower secondary	Never married	Urban
220	7	3	1	8	4	2	0.12, 0.22	0.84, 0.94	0.12	0.22	0.84	0.94	1.54282	0.321157	0.17	0.89	0.931987	55 to 64	Male	Upper secondary	Divorced	Urban
221	7	2	3	8	3	4	0.06, 0.17	0.89, 0.99	0.06	0.17	0.89	0.99	1.79249	1.56847	0.115	0.94	1.68048	45 to 54	Female	Graduate	Married	Rural
222	7	5	3	8	6	4	0.22, 0.30	0.77, 0.85	0.22	0.30	0.77	0.85	1.7828	1.5027	0.26	0.81	1.64275	15 to 24	Male	Upper secondary	Married	Rural
223	8	5	3	9	6	4	0.27, 0.34	0.82, 0.89	0.27	0.34	0.82	0.89	1.78364	1.48349	0.305	0.855	1.63357	35 to 44	Male	Below lower secondary	Widowed	Rural
224	7	4	3	8	5	4	0.17, 0.26	0.80, 0.89	0.17	0.26	0.80	0.89	1.78383	1.52247	0.215	0.845	1.65315	25 to 34	Female	Upper secondary	Divorced	Urban
225	7	3	1	8	4	2	0.12, 0.22	0.84, 0.94	0.12	0.22	0.84	0.94	1.54282	0.321157	0.17	0.89	0.931987	45 to 54	Male	Below lower secondary	Married	Urban
226	8	5	1	9	6	2	0.27, 0.34	0.82, 0.89	0.27	0.34	0.82	0.89	1.48349	0.282836	0.305	0.855	0.883164	45 to 54	Male	Short-cycle tertiary	Married	Urban
227	7	3	3	8	4	4	0.12, 0.22	0.84, 0.94	0.12	0.22	0.84	0.94	1.78667	1.54282	0.17	0.89	1.66474	25 to 34	Male	Graduate	Never married	Rural
228	6	7	3	7	8	4	0.26, 0.36	0.60, 0.70	0.26	0.36	0.60	0.70	1.78385	1.48139	0.31	0.65	1.63262	45 to 54	Female	Short-cycle tertiary	Widowed	Rural
229	9	4	3	10	5	4	0.27, 1.00	0.75, 1.89	0.27	1.00	0.75	1.89	1.8558	1.35904	0.635	1.32	1.60742	55 to 64	Male	Graduate	Never married	Urban
230	7	5	3	8	6	4	0.22, 0.30	0.77, 0.85	0.22	0.30	0.77	0.85	1.7828	1.5027	0.26	0.81	1.64275	25 to 34	Male	Lower secondary	Widowed	Urban
231	6	7	1	7	8	2	0.26, 0.36	0.60, 0.70	0.26	0.36	0.60	0.70	1.48139	0.281489	0.31	0.65	0.881441	15 to 24	Male	Lower secondary	Never married	Urban
232	6	3	1	7	4	2	0.06, 0.16	0.78, 0.88	0.06	0.16	0.78	0.88	1.57085	0.339429	0.11	0.83	0.95514	15 to 24	Female	Below lower secondary	Divorced	Rural
233	7	4	3	8	5	4	0.17, 0.26	0.80, 0.89	0.17	0.26	0.80	0.89	1.78383	1.52247	0.215	0.845	1.65315	35 to 44	Female	Short-cycle tertiary	Married	Urban
234	10	13	1	11	14	2	0.71, 1.00	0.48, 1.89	0.71	1.00	0.48	1.89	1.29094	0.162228	0.855	1.185	0.726583	Over 65	Male	Below lower secondary	Widowed	Urban
235	7	13	1	8	14	2	0.61, 0.69	0.34, 0.44	0.61	0.69	0.34	0.44	1.35404	0.201042	0.65	0.39	0.777541	25 to 34	Male	Upper secondary	Married	Urban
236	7	7	1	8	8	2	0.32, 0.41	0.66, 0.75	0.32	0.41	0.66	0.75	1.45875	0.266997	0.365	0.705	0.862871	15 to 24	Female	Bachelor	Divorced	Urban
237	7	3	3	8	4	4	0.12, 0.22	0.84, 0.94	0.12	0.22	0.84	0.94	1.78667	1.54282	0.17	0.89	1.66474	15 to 24	Female	Short-cycle tertiary	Married	Urban
238	7	4	3	8	5	4	0.17, 0.26	0.80, 0.89	0.17	0.26	0.80	0.89	1.78383	1.52247	0.215	0.845	1.65315	25 to 34	Female	Short-cycle tertiary	Never married	Rural
239	7	5	3	8	6	4	0.22, 0.30	0.77, 0.85	0.22	0.30	0.77	0.85	1.7828	1.5027	0.26	0.81	1.64275	Over 65	Female	Lower secondary	Divorced	Urban
240	7	4	3	8	5	4	0.17, 0.26	0.80, 0.89	0.17	0.26	0.80	0.89	1.78383	1.52247	0.215	0.845	1.65315	55 to 64	Female	Graduate	Widowed	Urban
241	7	4	3	8	5	4	0.17, 0.26	0.80, 0.89	0.17	0.26	0.80	0.89	1.78383	1.52247	0.215	0.845	1.65315	45 to 54	Female	Short-cycle tertiary	Widowed	Rural
242	7	4	3	8	5	4	0.17, 0.26	0.80, 0.89	0.17	0.26	0.80	0.89	1.78383	1.52247	0.215	0.845	1.65315	25 to 34	Male	Upper secondary	Married	Rural
243	9	6	3	10	7	4	0.34, 1.00	0.75, 1.89	0.34	1.00	0.75	1.89	1.87129	1.34745	0.67	1.32	1.60937	35 to 44	Male	Below lower secondary	Married	Rural
244	9	4	3	10	5	4	0.27, 1.00	0.75, 1.89	0.27	1.00	0.75	1.89	1.8558	1.35904	0.635	1.32	1.60742	35 to 44	Male	Below lower secondary	Never married	Urban
245	10	5	1	11	6	2	0.37, 0.44	0.93, 1.00	0.37	0.44	0.93	1.00	1.44279	0.256831	0.405	0.965	0.849808	Over 65	Male	Lower secondary	Widowed	Rural
246	8	7	1	9	8	2	0.36, 0.44	0.71, 0.80	0.36	0.44	0.71	0.80	1.44476	0.258085	0.4	0.755	0.851421	25 to 34	Female	Graduate	Widowed	Urban
247	7	7	1	8	8	2	0.32, 0.41	0.66, 0.75	0.32	0.41	0.66	0.75	1.45875	0.266997	0.365	0.705	0.862871	45 to 54	Female	Lower secondary	Never married	Urban
248	7	5	3	8	6	4	0.22, 0.30	0.77, 0.85	0.22	0.30	0.77	0.85	1.7828	1.5027	0.26	0.81	1.64275	55 to 64	Male	Upper secondary	Divorced	Rural
249	7	9	2	8	10	3	0.41, 0.50	0.56, 0.66	0.41	0.50	0.56	0.66	1.80109	1.42343	0.455	0.61	1.61226	55 to 64	Female	Lower secondary	Married	Urban
250	7	4	3	8	5	4	0.17, 0.26	0.80, 0.89	0.17	0.26	0.80	0.89	1.78383	1.52247	0.215	0.845	1.65315	35 to 44	Female	Lower secondary	Widowed	Urban
251	8	1	3	9	2	4	0.06, 0.16	0.99, 1.09	0.06	0.16	0.99	1.09	1.79314	1.57085	0.11	1.04	1.68199	25 to 34	Female	Below lower secondary	Widowed	Urban
252	6	0	3	7	1	4	#N/A	#N/A	#N/A	#N/A	#N/A	#N/A	#N/A	#N/A	#N/A	#N/A	#N/A	25 to 34	Female	Below lower secondary	Never married	Urban
253	8	3	1	9	4	2	0.18, 0.26	0.90, 0.98	0.18	0.26	0.90	0.98	1.52025	0.306521	0.22	0.94	0.913384	15 to 24	Female	Upper secondary	Married	Rural
254	7	4	3	8	5	4	0.17, 0.26	0.80, 0.89	0.17	0.26	0.80	0.89	1.78383	1.52247	0.215	0.845	1.65315	35 to 44	Female	Bachelor	Married	Urban
255	7	3	3	8	4	4	0.12, 0.22	0.84, 0.94	0.12	0.22	0.84	0.94	1.78667	1.54282	0.17	0.89	1.66474	25 to 34	Male	Short-cycle tertiary	Never married	Urban
256	7	4	3	8	5	4	0.17, 0.26	0.80, 0.89	0.17	0.26	0.80	0.89	1.78383	1.52247	0.215	0.845	1.65315	55 to 64	Female	Short-cycle tertiary	Widowed	Urban
257	7	4	3	8	5	4	0.17, 0.26	0.80, 0.89	0.17	0.26	0.80	0.89	1.78383	1.52247	0.215	0.845	1.65315	25 to 34	Female	Bachelor	Married	Urban
258	6	7	3	7	8	4	0.26, 0.36	0.60, 0.70	0.26	0.36	0.60	0.70	1.78385	1.48139	0.31	0.65	1.63262	15 to 24	Female	Bachelor	Divorced	Rural
259	7	0	3	8	1	4	#N/A	#N/A	#N/A	#N/A	#N/A	#N/A	#N/A	#N/A	#N/A	#N/A	#N/A	25 to 34	Male	Below lower secondary	Never married	Rural
260	7	4	3	8	5	4	0.17, 0.26	0.80, 0.89	0.17	0.26	0.80	0.89	1.78383	1.52247	0.215	0.845	1.65315	Over 65	Male	Short-cycle tertiary	Widowed	Urban
261	7	4	3	8	5	4	0.17, 0.26	0.80, 0.89	0.17	0.26	0.80	0.89	1.78383	1.52247	0.215	0.845	1.65315	25 to 34	Male	Short-cycle tertiary	Divorced	Urban
262	7	3	1	8	4	2	0.12, 0.22	0.84, 0.94	0.12	0.22	0.84	0.94	1.54282	0.321157	0.17	0.89	0.931987	15 to 24	Male	Short-cycle tertiary	Married	Rural
263	7	5	3	8	6	4	0.22, 0.30	0.77, 0.85	0.22	0.30	0.77	0.85	1.7828	1.5027	0.26	0.81	1.64275	Over 65	Female	Upper secondary	Widowed	Rural
264	7	4	3	8	5	4	0.17, 0.26	0.80, 0.89	0.17	0.26	0.80	0.89	1.78383	1.52247	0.215	0.845	1.65315	25 to 34	Female	Graduate	Widowed	Urban
265	7	4	3	8	5	4	0.17, 0.26	0.80, 0.89	0.17	0.26	0.80	0.89	1.78383	1.52247	0.215	0.845	1.65315	35 to 44	Male	Below lower secondary	Never married	Rural
266	7	4	3	8	5	4	0.17, 0.26	0.80, 0.89	0.17	0.26	0.80	0.89	1.78383	1.52247	0.215	0.845	1.65315	35 to 44	Female	Below lower secondary	Married	Rural
267	7	3	3	8	4	4	0.12, 0.22	0.84, 0.94	0.12	0.22	0.84	0.94	1.78667	1.54282	0.17	0.89	1.66474	25 to 34	Female	Lower secondary	Widowed	Urban
268	7	5	3	8	6	4	0.22, 0.30	0.77, 0.85	0.22	0.30	0.77	0.85	1.7828	1.5027	0.26	0.81	1.64275	35 to 44	Male	Upper secondary	Divorced	Rural
269	9	6	3	10	7	4	0.34, 1.00	0.75, 1.89	0.34	1.00	0.75	1.89	1.87129	1.34745	0.67	1.32	1.60937	25 to 34	Male	Bachelor	Married	Rural
270	7	0	3	8	1	4	#N/A	#N/A	#N/A	#N/A	#N/A	#N/A	#N/A	#N/A	#N/A	#N/A	#N/A	55 to 64	Male	Bachelor	Widowed	Urban
271	7	3	3	8	4	4	0.12, 0.22	0.84, 0.94	0.12	0.22	0.84	0.94	1.78667	1.54282	0.17	0.89	1.66474	Over 65	Female	Graduate	Married	Urban
272	7	0	3	8	1	4	#N/A	#N/A	#N/A	#N/A	#N/A	#N/A	#N/A	#N/A	#N/A	#N/A	#N/A	45 to 54	Male	Graduate	Divorced	Urban
273	7	3	1	8	4	2	0.12, 0.22	0.84, 0.94	0.12	0.22	0.84	0.94	1.54282	0.321157	0.17	0.89	0.931987	35 to 44	Male	Below lower secondary	Married	Urban
274	8	6	3	9	7	4	0.31, 0.39	0.76, 0.86	0.31	0.39	0.76	0.86	1.78644	1.46484	0.35	0.81	1.62564	Over 65	Female	Short-cycle tertiary	Married	Urban
275	8	3	3	9	4	4	0.18, 0.26	0.90, 0.98	0.18	0.26	0.90	0.98	1.78363	1.52025	0.22	0.94	1.65194	35 to 44	Male	Short-cycle tertiary	Divorced	Rural
276	8	4	3	9	5	4	0.23, 0.30	0.86, 0.93	0.23	0.30	0.86	0.93	1.7828	1.50054	0.265	0.895	1.64167	45 to 54	Male	Short-cycle tertiary	Widowed	Urban
277	7	5	1	8	6	2	0.22, 0.30	0.77, 0.85	0.22	0.30	0.77	0.85	1.5027	0.29519	0.26	0.81	0.898945	55 to 64	Female	Graduate	Widowed	Urban
278	7	3	3	8	4	4	0.12, 0.22	0.84, 0.94	0.12	0.22	0.84	0.94	1.78667	1.54282	0.17	0.89	1.66474	15 to 24	Female	Upper secondary	Never married	Rural
279	6	7	3	7	8	4	0.26, 0.36	0.60, 0.70	0.26	0.36	0.60	0.70	1.78385	1.48139	0.31	0.65	1.63262	15 to 24	Male	Upper secondary	Widowed	Urban
280	7	4	3	8	5	4	0.17, 0.26	0.80, 0.89	0.17	0.26	0.80	0.89	1.78383	1.52247	0.215	0.845	1.65315	45 to 54	Female	Graduate	Divorced	Urban
281	7	3	1	8	4	2	0.12, 0.22	0.84, 0.94	0.12	0.22	0.84	0.94	1.54282	0.321157	0.17	0.89	0.931987	15 to 24	Male	Bachelor	Divorced	Rural
282	7	3	4	8	4	5	0.12, 0.22	0.84, 0.94	0.12	0.22	0.84	0.94	3.62272	2.31849	0.17	0.89	2.9706	Over 65	Male	Short-cycle tertiary	Never married	Rural
283	7	4	3	8	5	4	0.17, 0.26	0.80, 0.89	0.17	0.26	0.80	0.89	1.78383	1.52247	0.215	0.845	1.65315	Over 65	Male	Graduate	Widowed	Urban
284	7	4	3	8	5	4	0.17, 0.26	0.80, 0.89	0.17	0.26	0.80	0.89	1.78383	1.52247	0.215	0.845	1.65315	55 to 64	Male	Graduate	Divorced	Rural
285	6	3	3	7	4	4	0.06, 0.16	0.78, 0.88	0.06	0.16	0.78	0.88	1.79314	1.57085	0.11	0.83	1.68199	Over 65	Male	Lower secondary	Widowed	Rural
286	7	4	3	8	5	4	0.17, 0.26	0.80, 0.89	0.17	0.26	0.80	0.89	1.78383	1.52247	0.215	0.845	1.65315	35 to 44	Male	Lower secondary	Widowed	Urban
287	7	3	1	8	4	2	0.12, 0.22	0.84, 0.94	0.12	0.22	0.84	0.94	1.54282	0.321157	0.17	0.89	0.931987	25 to 34	Male	Short-cycle tertiary	Never married	Urban
288	6	9	3	7	10	4	0.36, 0.45	0.51, 0.61	0.36	0.45	0.51	0.61	1.79265	1.44279	0.405	0.56	1.61772	45 to 54	Male	Bachelor	Widowed	Urban
289	7	5	3	8	6	4	0.22, 0.30	0.77, 0.85	0.22	0.30	0.77	0.85	1.7828	1.5027	0.26	0.81	1.64275	Over 65	Male	Lower secondary	Married	Urban
290	7	4	3	8	5	4	0.17, 0.26	0.80, 0.89	0.17	0.26	0.80	0.89	1.78383	1.52247	0.215	0.845	1.65315	35 to 44	Female	Graduate	Never married	Urban
291	6	7	3	7	8	4	0.26, 0.36	0.60, 0.70	0.26	0.36	0.60	0.70	1.78385	1.48139	0.31	0.65	1.63262	45 to 54	Male	Bachelor	Never married	Urban
292	8	4	3	9	5	4	0.23, 0.30	0.86, 0.93	0.23	0.30	0.86	0.93	1.7828	1.50054	0.265	0.895	1.64167	25 to 34	Male	Below lower secondary	Never married	Urban
293	7	5	3	8	6	4	0.22, 0.30	0.77, 0.85	0.22	0.30	0.77	0.85	1.7828	1.5027	0.26	0.81	1.64275	15 to 24	Female	Below lower secondary	Married	Rural
294	8	3	3	9	4	4	0.18, 0.26	0.90, 0.98	0.18	0.26	0.90	0.98	1.78363	1.52025	0.22	0.94	1.65194	55 to 64	Female	Short-cycle tertiary	Never married	Urban
295	6	7	1	7	8	2	0.26, 0.36	0.60, 0.70	0.26	0.36	0.60	0.70	1.48139	0.281489	0.31	0.65	0.881441	35 to 44	Male	Graduate	Divorced	Rural
296	7	6	3	8	7	4	0.25, 0.36	0.71, 0.82	0.25	0.36	0.71	0.82	1.78364	1.48349	0.305	0.765	1.63357	25 to 34	Female	Lower secondary	Divorced	Urban
297	7	3	1	8	4	2	0.12, 0.22	0.84, 0.94	0.12	0.22	0.84	0.94	1.54282	0.321157	0.17	0.89	0.931987	Over 65	Male	Graduate	Never married	Rural
298	7	5	3	8	6	4	0.22, 0.30	0.77, 0.85	0.22	0.30	0.77	0.85	1.7828	1.5027	0.26	0.81	1.64275	Over 65	Male	Bachelor	Divorced	Rural
299	7	5	3	8	6	4	0.22, 0.30	0.77, 0.85	0.22	0.30	0.77	0.85	1.7828	1.5027	0.26	0.81	1.64275	35 to 44	Male	Below lower secondary	Never married	Urban
300	7	4	3	8	5	4	0.17, 0.26	0.80, 0.89	0.17	0.26	0.80	0.89	1.78383	1.52247	0.215	0.845	1.65315	25 to 34	Female	Upper secondary	Never married	Urban

## Sheet: feature claude
Feature	S1	S2	S3	S1-corrected	S2-corrected	S3-corrected	sigma range	alpha range	sigma lower bound	sigma upper bound	alpha lower bound	alpha upper bound	lambda upper bound	lambda lower bound	sigma	alpha	lambda	Age	Gender	Education	Marital Status	Location
1	6	7	2	7	8	3	0.26, 0.36	0.60, 0.70	0.26	0.36	0.60	0.70	1.78385	1.48139	0.31	0.65	1.63262	25 to 34	Female	Below lower secondary	Never married	Rural
2	6	7	3	7	8	4	0.26, 0.36	0.60, 0.70	0.26	0.36	0.60	0.70	2.26605	1.78385	0.31	0.65	2.02495	15 to 24	Female	Upper secondary	Never married	Rural
3	7	9	3	8	10	4	0.41, 0.50	0.56, 0.66	0.41	0.50	0.56	0.66	2.24035	1.80109	0.455	0.61	2.02072	45 to 54	Male	Short-cycle tertiary	Widowed	Urban
4	6	9	4	7	10	5	0.36, 0.45	0.51, 0.61	0.36	0.45	0.51	0.61	3.73262	2.2458	0.405	0.56	2.98921	55 to 64	Female	Below lower secondary	Never married	Urban
5	7	6	3	8	7	4	0.25, 0.36	0.71, 0.82	0.25	0.36	0.71	0.82	2.26747	1.78364	0.305	0.765	2.02555	25 to 34	Male	Short-cycle tertiary	Married	Urban
6	7	9	4	8	10	5	0.41, 0.50	0.56, 0.66	0.41	0.50	0.56	0.66	3.77586	2.24035	0.455	0.61	3.0081	15 to 24	Female	Bachelor	Never married	Urban
7	6	7	2	7	8	3	0.26, 0.36	0.60, 0.70	0.26	0.36	0.60	0.70	1.78385	1.48139	0.31	0.65	1.63262	Over 65	Female	Graduate	Never married	Urban
8	6	8	5	7	9	6	0.31, 0.40	0.56, 0.65	0.31	0.40	0.56	0.65	4.7943	3.69685	0.355	0.605	4.24557	Over 65	Male	Short-cycle tertiary	Widowed	Rural
9	6	7	4	7	8	5	0.26, 0.36	0.60, 0.70	0.26	0.36	0.60	0.70	3.67068	2.26605	0.31	0.65	2.96837	25 to 34	Male	Lower secondary	Divorced	Rural
10	5	7	3	6	8	4	0.21, 0.31	0.55, 0.64	0.21	0.31	0.55	0.64	2.28175	1.7828	0.26	0.595	2.03228	45 to 54	Male	Lower secondary	Divorced	Urban
11	6	7	2	7	8	3	0.26, 0.36	0.60, 0.70	0.26	0.36	0.60	0.70	1.78385	1.48139	0.31	0.65	1.63262	15 to 24	Female	Upper secondary	Divorced	Urban
12	5	7	2	6	8	3	0.21, 0.31	0.55, 0.64	0.21	0.31	0.55	0.64	1.7828	1.5027	0.26	0.595	1.64275	25 to 34	Female	Short-cycle tertiary	Divorced	Rural
13	6	7	4	7	8	5	0.26, 0.36	0.60, 0.70	0.26	0.36	0.60	0.70	3.67068	2.26605	0.31	0.65	2.96837	35 to 44	Male	Below lower secondary	Divorced	Rural
14	7	8	4	8	9	5	0.37, 0.45	0.62, 0.70	0.37	0.45	0.62	0.70	3.7366	2.24509	0.41	0.66	2.99085	45 to 54	Male	Short-cycle tertiary	Never married	Rural
15	6	10	4	7	11	5	0.41, 0.51	0.45, 0.55	0.41	0.51	0.45	0.55	3.78061	2.24	0.46	0.5	3.01031	15 to 24	Female	Graduate	Married	Urban
16	6	7	4	7	8	5	0.26, 0.36	0.60, 0.70	0.26	0.36	0.60	0.70	3.67068	2.26605	0.31	0.65	2.96837	45 to 54	Male	Graduate	Never married	Rural
17	6	7	3	7	8	4	0.26, 0.36	0.60, 0.70	0.26	0.36	0.60	0.70	2.26605	1.78385	0.31	0.65	2.02495	55 to 64	Female	Lower secondary	Never married	Urban
18	5	7	4	6	8	5	0.21, 0.31	0.55, 0.64	0.21	0.31	0.55	0.64	3.64793	2.28175	0.26	0.595	2.96484	35 to 44	Male	Below lower secondary	Divorced	Urban
19	6	7	4	7	8	5	0.26, 0.36	0.60, 0.70	0.26	0.36	0.60	0.70	3.67068	2.26605	0.31	0.65	2.96837	35 to 44	Female	Upper secondary	Married	Rural
20	6	7	4	7	8	5	0.26, 0.36	0.60, 0.70	0.26	0.36	0.60	0.70	3.67068	2.26605	0.31	0.65	2.96837	35 to 44	Female	Lower secondary	Married	Rural
21	6	7	4	7	8	5	0.26, 0.36	0.60, 0.70	0.26	0.36	0.60	0.70	3.67068	2.26605	0.31	0.65	2.96837	45 to 54	Male	Below lower secondary	Divorced	Rural
22	5	7	2	6	8	3	0.21, 0.31	0.55, 0.64	0.21	0.31	0.55	0.64	1.7828	1.5027	0.26	0.595	1.64275	15 to 24	Female	Below lower secondary	Widowed	Urban
23	6	7	3	7	8	4	0.26, 0.36	0.60, 0.70	0.26	0.36	0.60	0.70	2.26605	1.78385	0.31	0.65	2.02495	35 to 44	Female	Below lower secondary	Married	Urban
24	6	10	4	7	11	5	0.41, 0.51	0.45, 0.55	0.41	0.51	0.45	0.55	3.78061	2.24	0.46	0.5	3.01031	55 to 64	Female	Short-cycle tertiary	Widowed	Rural
25	6	7	3	7	8	4	0.26, 0.36	0.60, 0.70	0.26	0.36	0.60	0.70	2.26605	1.78385	0.31	0.65	2.02495	45 to 54	Male	Bachelor	Widowed	Rural
26	6	7	3	7	8	4	0.26, 0.36	0.60, 0.70	0.26	0.36	0.60	0.70	2.26605	1.78385	0.31	0.65	2.02495	55 to 64	Female	Upper secondary	Widowed	Urban
27	6	7	4	7	8	5	0.26, 0.36	0.60, 0.70	0.26	0.36	0.60	0.70	3.67068	2.26605	0.31	0.65	2.96837	55 to 64	Male	Bachelor	Divorced	Rural
28	6	9	4	7	10	5	0.36, 0.45	0.51, 0.61	0.36	0.45	0.51	0.61	3.73262	2.2458	0.405	0.56	2.98921	15 to 24	Male	Bachelor	Never married	Rural
29	7	6	4	8	7	5	0.25, 0.36	0.71, 0.82	0.25	0.36	0.71	0.82	3.66811	2.26747	0.305	0.765	2.96779	35 to 44	Male	Graduate	Widowed	Urban
30	6	7	4	7	8	5	0.26, 0.36	0.60, 0.70	0.26	0.36	0.60	0.70	3.67068	2.26605	0.31	0.65	2.96837	35 to 44	Male	Bachelor	Divorced	Rural
31	6	7	2	7	8	3	0.26, 0.36	0.60, 0.70	0.26	0.36	0.60	0.70	1.78385	1.48139	0.31	0.65	1.63262	45 to 54	Female	Short-cycle tertiary	Divorced	Urban
32	6	7	4	7	8	5	0.26, 0.36	0.60, 0.70	0.26	0.36	0.60	0.70	3.67068	2.26605	0.31	0.65	2.96837	55 to 64	Female	Lower secondary	Widowed	Rural
33	6	7	4	7	8	5	0.26, 0.36	0.60, 0.70	0.26	0.36	0.60	0.70	3.67068	2.26605	0.31	0.65	2.96837	35 to 44	Male	Bachelor	Divorced	Rural
34	7	8	3	8	9	4	0.37, 0.45	0.62, 0.70	0.37	0.45	0.62	0.70	2.24509	1.79337	0.41	0.66	2.01923	45 to 54	Male	Short-cycle tertiary	Widowed	Urban
35	6	7	3	7	8	4	0.26, 0.36	0.60, 0.70	0.26	0.36	0.60	0.70	2.26605	1.78385	0.31	0.65	2.02495	25 to 34	Female	Upper secondary	Married	Rural
36	7	6	4	8	7	5	0.25, 0.36	0.71, 0.82	0.25	0.36	0.71	0.82	3.66811	2.26747	0.305	0.765	2.96779	55 to 64	Male	Lower secondary	Divorced	Rural
37	6	7	3	7	8	4	0.26, 0.36	0.60, 0.70	0.26	0.36	0.60	0.70	2.26605	1.78385	0.31	0.65	2.02495	25 to 34	Male	Short-cycle tertiary	Never married	Urban
38	5	7	3	6	8	4	0.21, 0.31	0.55, 0.64	0.21	0.31	0.55	0.64	2.28175	1.7828	0.26	0.595	2.03228	55 to 64	Female	Below lower secondary	Widowed	Rural
39	6	7	3	7	8	4	0.26, 0.36	0.60, 0.70	0.26	0.36	0.60	0.70	2.26605	1.78385	0.31	0.65	2.02495	45 to 54	Female	Below lower secondary	Married	Rural
40	6	7	4	7	8	5	0.26, 0.36	0.60, 0.70	0.26	0.36	0.60	0.70	3.67068	2.26605	0.31	0.65	2.96837	35 to 44	Female	Lower secondary	Divorced	Urban
41	5	7	3	6	8	4	0.21, 0.31	0.55, 0.64	0.21	0.31	0.55	0.64	2.28175	1.7828	0.26	0.595	2.03228	15 to 24	Female	Short-cycle tertiary	Widowed	Rural
42	7	9	4	8	10	5	0.41, 0.50	0.56, 0.66	0.41	0.50	0.56	0.66	3.77586	2.24035	0.455	0.61	3.0081	25 to 34	Female	Graduate	Married	Urban
43	7	9	3	8	10	4	0.41, 0.50	0.56, 0.66	0.41	0.50	0.56	0.66	2.24035	1.80109	0.455	0.61	2.02072	Over 65	Female	Graduate	Divorced	Urban
44	7	6	3	8	7	4	0.25, 0.36	0.71, 0.82	0.25	0.36	0.71	0.82	2.26747	1.78364	0.305	0.765	2.02555	15 to 24	Male	Below lower secondary	Never married	Urban
45	7	6	3	8	7	4	0.25, 0.36	0.71, 0.82	0.25	0.36	0.71	0.82	2.26747	1.78364	0.305	0.765	2.02555	25 to 34	Female	Upper secondary	Never married	Rural
46	6	7	4	7	8	5	0.26, 0.36	0.60, 0.70	0.26	0.36	0.60	0.70	3.67068	2.26605	0.31	0.65	2.96837	45 to 54	Female	Graduate	Never married	Urban
47	7	9	4	8	10	5	0.41, 0.50	0.56, 0.66	0.41	0.50	0.56	0.66	3.77586	2.24035	0.455	0.61	3.0081	45 to 54	Male	Upper secondary	Never married	Rural
48	6	7	3	7	8	4	0.26, 0.36	0.60, 0.70	0.26	0.36	0.60	0.70	2.26605	1.78385	0.31	0.65	2.02495	55 to 64	Male	Upper secondary	Divorced	Rural
49	4	7	3	5	8	4	0.15, 0.26	0.49, 0.59	0.15	0.26	0.49	0.59	2.30293	1.78431	0.205	0.54	2.04362	Over 65	Female	Graduate	Widowed	Rural
50	6	7	2	7	8	3	0.26, 0.36	0.60, 0.70	0.26	0.36	0.60	0.70	1.78385	1.48139	0.31	0.65	1.63262	35 to 44	Female	Upper secondary	Divorced	Rural
51	6	7	4	7	8	5	0.26, 0.36	0.60, 0.70	0.26	0.36	0.60	0.70	3.67068	2.26605	0.31	0.65	2.96837	45 to 54	Female	Below lower secondary	Never married	Rural
52	6	8	5	7	9	6	0.31, 0.40	0.56, 0.65	0.31	0.40	0.56	0.65	4.7943	3.69685	0.355	0.605	4.24557	45 to 54	Female	Graduate	Divorced	Rural
53	7	8	3	8	9	4	0.37, 0.45	0.62, 0.70	0.37	0.45	0.62	0.70	2.24509	1.79337	0.41	0.66	2.01923	15 to 24	Female	Lower secondary	Never married	Urban
54	6	7	4	7	8	5	0.26, 0.36	0.60, 0.70	0.26	0.36	0.60	0.70	3.67068	2.26605	0.31	0.65	2.96837	45 to 54	Male	Bachelor	Never married	Urban
55	7	6	4	8	7	5	0.25, 0.36	0.71, 0.82	0.25	0.36	0.71	0.82	3.66811	2.26747	0.305	0.765	2.96779	35 to 44	Female	Short-cycle tertiary	Widowed	Urban
56	7	10	4	8	11	5	0.46, 0.55	0.51, 0.60	0.46	0.55	0.51	0.60	3.82704	2.23861	0.505	0.555	3.03283	35 to 44	Female	Graduate	Married	Urban
57	6	7	2	7	8	3	0.26, 0.36	0.60, 0.70	0.26	0.36	0.60	0.70	1.78385	1.48139	0.31	0.65	1.63262	15 to 24	Female	Upper secondary	Divorced	Urban
58	4	9	3	5	10	4	0.26, 0.36	0.40, 0.50	0.26	0.36	0.40	0.50	2.26605	1.78385	0.31	0.45	2.02495	Over 65	Male	Lower secondary	Widowed	Rural
59	6	7	4	7	8	5	0.26, 0.36	0.60, 0.70	0.26	0.36	0.60	0.70	3.67068	2.26605	0.31	0.65	2.96837	45 to 54	Female	Short-cycle tertiary	Married	Rural
60	6	7	4	7	8	5	0.26, 0.36	0.60, 0.70	0.26	0.36	0.60	0.70	3.67068	2.26605	0.31	0.65	2.96837	35 to 44	Male	Bachelor	Never married	Urban
61	7	6	4	8	7	5	0.25, 0.36	0.71, 0.82	0.25	0.36	0.71	0.82	3.66811	2.26747	0.305	0.765	2.96779	45 to 54	Female	Lower secondary	Never married	Urban
62	6	7	4	7	8	5	0.26, 0.36	0.60, 0.70	0.26	0.36	0.60	0.70	3.67068	2.26605	0.31	0.65	2.96837	45 to 54	Male	Graduate	Divorced	Urban
63	5	7	3	6	8	4	0.21, 0.31	0.55, 0.64	0.21	0.31	0.55	0.64	2.28175	1.7828	0.26	0.595	2.03228	15 to 24	Male	Lower secondary	Widowed	Rural
64	6	7	4	7	8	5	0.26, 0.36	0.60, 0.70	0.26	0.36	0.60	0.70	3.67068	2.26605	0.31	0.65	2.96837	35 to 44	Male	Lower secondary	Divorced	Rural
65	7	6	4	8	7	5	0.25, 0.36	0.71, 0.82	0.25	0.36	0.71	0.82	3.66811	2.26747	0.305	0.765	2.96779	55 to 64	Female	Bachelor	Married	Rural
66	7	6	3	8	7	4	0.25, 0.36	0.71, 0.82	0.25	0.36	0.71	0.82	2.26747	1.78364	0.305	0.765	2.02555	25 to 34	Female	Below lower secondary	Never married	Rural
67	4	7	3	5	8	4	0.15, 0.26	0.49, 0.59	0.15	0.26	0.49	0.59	2.30293	1.78431	0.205	0.54	2.04362	Over 65	Male	Lower secondary	Married	Rural
68	6	7	3	7	8	4	0.26, 0.36	0.60, 0.70	0.26	0.36	0.60	0.70	2.26605	1.78385	0.31	0.65	2.02495	35 to 44	Female	Bachelor	Married	Urban
69	6	7	2	7	8	3	0.26, 0.36	0.60, 0.70	0.26	0.36	0.60	0.70	1.78385	1.48139	0.31	0.65	1.63262	25 to 34	Female	Below lower secondary	Divorced	Rural
70	6	7	3	7	8	4	0.26, 0.36	0.60, 0.70	0.26	0.36	0.60	0.70	2.26605	1.78385	0.31	0.65	2.02495	45 to 54	Male	Graduate	Widowed	Rural
71	5	8	4	6	9	5	0.26, 0.35	0.51, 0.59	0.26	0.35	0.51	0.59	3.66811	2.26747	0.305	0.55	2.96779	Over 65	Male	Short-cycle tertiary	Widowed	Urban
72	5	7	4	6	8	5	0.21, 0.31	0.55, 0.64	0.21	0.31	0.55	0.64	3.64793	2.28175	0.26	0.595	2.96484	45 to 54	Female	Short-cycle tertiary	Widowed	Rural
73	7	9	3	8	10	4	0.41, 0.50	0.56, 0.66	0.41	0.50	0.56	0.66	2.24035	1.80109	0.455	0.61	2.02072	35 to 44	Male	Upper secondary	Married	Rural
74	7	10	4	8	11	5	0.46, 0.55	0.51, 0.60	0.46	0.55	0.51	0.60	3.82704	2.23861	0.505	0.555	3.03283	35 to 44	Female	Graduate	Married	Urban
75	7	6	3	8	7	4	0.25, 0.36	0.71, 0.82	0.25	0.36	0.71	0.82	2.26747	1.78364	0.305	0.765	2.02555	25 to 34	Male	Lower secondary	Never married	Rural
76	7	9	3	8	10	4	0.41, 0.50	0.56, 0.66	0.41	0.50	0.56	0.66	2.24035	1.80109	0.455	0.61	2.02072	45 to 54	Female	Short-cycle tertiary	Married	Rural
77	6	9	5	7	10	6	0.36, 0.45	0.51, 0.61	0.36	0.45	0.51	0.61	4.82249	3.73262	0.405	0.56	4.27755	Over 65	Male	Short-cycle tertiary	Widowed	Rural
78	6	7	7	7	8	8	0.26, 0.36	0.60, 0.70	0.26	0.36	0.60	0.70	NA	NA	0.31	0.65	#VALUE!	Over 65	Female	Graduate	Married	Urban
79	6	7	5	7	8	6	0.26, 0.36	0.60, 0.70	0.26	0.36	0.60	0.70	4.77667	3.67068	0.31	0.65	4.22367	55 to 64	Male	Lower secondary	Widowed	Rural
80	7	9	3	8	10	4	0.41, 0.50	0.56, 0.66	0.41	0.50	0.56	0.66	2.24035	1.80109	0.455	0.61	2.02072	45 to 54	Male	Short-cycle tertiary	Divorced	Urban
81	5	7	4	6	8	5	0.21, 0.31	0.55, 0.64	0.21	0.31	0.55	0.64	3.64793	2.28175	0.26	0.595	2.96484	45 to 54	Female	Bachelor	Divorced	Urban
82	7	9	4	8	10	5	0.41, 0.50	0.56, 0.66	0.41	0.50	0.56	0.66	3.77586	2.24035	0.455	0.61	3.0081	35 to 44	Male	Graduate	Married	Rural
83	7	10	3	8	11	4	0.46, 0.55	0.51, 0.60	0.46	0.55	0.51	0.60	2.23861	1.81233	0.505	0.555	2.02547	15 to 24	Female	Lower secondary	Never married	Urban
84	6	8	3	7	9	4	0.31, 0.40	0.56, 0.65	0.31	0.40	0.56	0.65	2.25487	1.78688	0.355	0.605	2.02087	45 to 54	Male	Lower secondary	Never married	Rural
85	4	7	3	5	8	4	0.15, 0.26	0.49, 0.59	0.15	0.26	0.49	0.59	2.30293	1.78431	0.205	0.54	2.04362	Over 65	Female	Lower secondary	Never married	Rural
86	6	7	4	7	8	5	0.26, 0.36	0.60, 0.70	0.26	0.36	0.60	0.70	3.67068	2.26605	0.31	0.65	2.96837	15 to 24	Female	Graduate	Married	Urban
87	6	7	2	7	8	3	0.26, 0.36	0.60, 0.70	0.26	0.36	0.60	0.70	1.78385	1.48139	0.31	0.65	1.63262	15 to 24	Male	Below lower secondary	Never married	Rural
88	7	8	4	8	9	5	0.37, 0.45	0.62, 0.70	0.37	0.45	0.62	0.70	3.7366	2.24509	0.41	0.66	2.99085	25 to 34	Male	Bachelor	Never married	Rural
89	6	7	4	7	8	5	0.26, 0.36	0.60, 0.70	0.26	0.36	0.60	0.70	3.67068	2.26605	0.31	0.65	2.96837	35 to 44	Male	Graduate	Never married	Rural
90	6	9	4	7	10	5	0.36, 0.45	0.51, 0.61	0.36	0.45	0.51	0.61	3.73262	2.2458	0.405	0.56	2.98921	Over 65	Female	Short-cycle tertiary	Widowed	Urban
91	4	7	5	5	8	6	0.15, 0.26	0.49, 0.59	0.15	0.26	0.49	0.59	4.76238	3.63021	0.205	0.54	4.19629	Over 65	Female	Upper secondary	Divorced	Rural
92	5	7	3	6	8	4	0.21, 0.31	0.55, 0.64	0.21	0.31	0.55	0.64	2.28175	1.7828	0.26	0.595	2.03228	45 to 54	Male	Short-cycle tertiary	Married	Urban
93	6	7	2	7	8	3	0.26, 0.36	0.60, 0.70	0.26	0.36	0.60	0.70	1.78385	1.48139	0.31	0.65	1.63262	Over 65	Male	Graduate	Never married	Rural
94	6	7	4	7	8	5	0.26, 0.36	0.60, 0.70	0.26	0.36	0.60	0.70	3.67068	2.26605	0.31	0.65	2.96837	35 to 44	Female	Bachelor	Divorced	Rural
95	5	7	3	6	8	4	0.21, 0.31	0.55, 0.64	0.21	0.31	0.55	0.64	2.28175	1.7828	0.26	0.595	2.03228	55 to 64	Female	Below lower secondary	Married	Urban
96	7	6	4	8	7	5	0.25, 0.36	0.71, 0.82	0.25	0.36	0.71	0.82	3.66811	2.26747	0.305	0.765	2.96779	55 to 64	Male	Below lower secondary	Married	Urban
97	7	9	4	8	10	5	0.41, 0.50	0.56, 0.66	0.41	0.50	0.56	0.66	3.77586	2.24035	0.455	0.61	3.0081	25 to 34	Male	Short-cycle tertiary	Married	Rural
98	7	10	4	8	11	5	0.46, 0.55	0.51, 0.60	0.46	0.55	0.51	0.60	3.82704	2.23861	0.505	0.555	3.03283	55 to 64	Male	Upper secondary	Never married	Urban
99	4	10	3	5	11	4	0.32, 0.42	0.34, 0.45	0.32	0.42	0.34	0.45	2.25178	1.78834	0.37	0.395	2.02006	55 to 64	Female	Below lower secondary	Widowed	Rural
100	7	10	4	8	11	5	0.46, 0.55	0.51, 0.60	0.46	0.55	0.51	0.60	3.82704	2.23861	0.505	0.555	3.03283	25 to 34	Female	Graduate	Never married	Urban
101	5	7	6	6	8	7	0.21, 0.31	0.55, 0.64	0.21	0.31	0.55	0.64	13.6166	4.76531	0.26	0.595	9.19096	Over 65	Female	Short-cycle tertiary	Married	Rural
102	6	9	4	7	10	5	0.36, 0.45	0.51, 0.61	0.36	0.45	0.51	0.61	3.73262	2.2458	0.405	0.56	2.98921	15 to 24	Female	Bachelor	Never married	Rural
103	7	9	4	8	10	5	0.41, 0.50	0.56, 0.66	0.41	0.50	0.56	0.66	3.77586	2.24035	0.455	0.61	3.0081	35 to 44	Female	Graduate	Married	Urban
104	6	7	2	7	8	3	0.26, 0.36	0.60, 0.70	0.26	0.36	0.60	0.70	1.78385	1.48139	0.31	0.65	1.63262	55 to 64	Female	Below lower secondary	Widowed	Urban
105	6	7	4	7	8	5	0.26, 0.36	0.60, 0.70	0.26	0.36	0.60	0.70	3.67068	2.26605	0.31	0.65	2.96837	55 to 64	Male	Short-cycle tertiary	Divorced	Rural
106	7	6	4	8	7	5	0.25, 0.36	0.71, 0.82	0.25	0.36	0.71	0.82	3.66811	2.26747	0.305	0.765	2.96779	55 to 64	Female	Lower secondary	Never married	Urban
107	5	7	2	6	8	3	0.21, 0.31	0.55, 0.64	0.21	0.31	0.55	0.64	1.7828	1.5027	0.26	0.595	1.64275	25 to 34	Female	Short-cycle tertiary	Never married	Rural
108	6	7	5	7	8	6	0.26, 0.36	0.60, 0.70	0.26	0.36	0.60	0.70	4.77667	3.67068	0.31	0.65	4.22367	45 to 54	Female	Graduate	Divorced	Rural
109	6	7	4	7	8	5	0.26, 0.36	0.60, 0.70	0.26	0.36	0.60	0.70	3.67068	2.26605	0.31	0.65	2.96837	35 to 44	Female	Upper secondary	Married	Rural
110	6	8	3	7	9	4	0.31, 0.40	0.56, 0.65	0.31	0.40	0.56	0.65	2.25487	1.78688	0.355	0.605	2.02087	25 to 34	Female	Short-cycle tertiary	Never married	Urban
111	9	7	4	10	8	5	0.40, 1.00	0.75, 1.89	0.40	1.00	0.75	1.89	4.1133	2.26971	0.7	1.32	3.19151	25 to 34	Male	Short-cycle tertiary	Widowed	Urban
112	6	7	4	7	8	5	0.26, 0.36	0.60, 0.70	0.26	0.36	0.60	0.70	3.67068	2.26605	0.31	0.65	2.96837	55 to 64	Male	Bachelor	Divorced	Urban
113	4	7	3	5	8	4	0.15, 0.26	0.49, 0.59	0.15	0.26	0.49	0.59	2.30293	1.78431	0.205	0.54	2.04362	Over 65	Female	Below lower secondary	Married	Rural
114	6	7	4	7	8	5	0.26, 0.36	0.60, 0.70	0.26	0.36	0.60	0.70	3.67068	2.26605	0.31	0.65	2.96837	55 to 64	Male	Bachelor	Never married	Rural
115	5	7	2	6	8	3	0.21, 0.31	0.55, 0.64	0.21	0.31	0.55	0.64	1.7828	1.5027	0.26	0.595	1.64275	55 to 64	Female	Lower secondary	Divorced	Rural
116	6	7	3	7	8	4	0.26, 0.36	0.60, 0.70	0.26	0.36	0.60	0.70	2.26605	1.78385	0.31	0.65	2.02495	15 to 24	Male	Upper secondary	Married	Urban
117	6	7	4	7	8	5	0.26, 0.36	0.60, 0.70	0.26	0.36	0.60	0.70	3.67068	2.26605	0.31	0.65	2.96837	25 to 34	Male	Bachelor	Divorced	Urban
118	6	7	2	7	8	3	0.26, 0.36	0.60, 0.70	0.26	0.36	0.60	0.70	1.78385	1.48139	0.31	0.65	1.63262	15 to 24	Male	Short-cycle tertiary	Never married	Urban
119	6	7	4	7	8	5	0.26, 0.36	0.60, 0.70	0.26	0.36	0.60	0.70	3.67068	2.26605	0.31	0.65	2.96837	55 to 64	Male	Below lower secondary	Divorced	Rural
120	6	7	3	7	8	4	0.26, 0.36	0.60, 0.70	0.26	0.36	0.60	0.70	2.26605	1.78385	0.31	0.65	2.02495	45 to 54	Female	Graduate	Widowed	Urban
121	6	8	5	7	9	6	0.31, 0.40	0.56, 0.65	0.31	0.40	0.56	0.65	4.7943	3.69685	0.355	0.605	4.24557	Over 65	Female	Short-cycle tertiary	Widowed	Urban
122	6	7	4	7	8	5	0.26, 0.36	0.60, 0.70	0.26	0.36	0.60	0.70	3.67068	2.26605	0.31	0.65	2.96837	25 to 34	Male	Bachelor	Married	Urban
123	7	8	4	8	9	5	0.37, 0.45	0.62, 0.70	0.37	0.45	0.62	0.70	3.7366	2.24509	0.41	0.66	2.99085	35 to 44	Male	Lower secondary	Married	Rural
124	5	7	3	6	8	4	0.21, 0.31	0.55, 0.64	0.21	0.31	0.55	0.64	2.28175	1.7828	0.26	0.595	2.03228	Over 65	Male	Below lower secondary	Never married	Urban
125	6	8	4	7	9	5	0.31, 0.40	0.56, 0.65	0.31	0.40	0.56	0.65	3.69685	2.25487	0.355	0.605	2.97586	45 to 54	Female	Lower secondary	Married	Rural
126	7	8	3	8	9	4	0.37, 0.45	0.62, 0.70	0.37	0.45	0.62	0.70	2.24509	1.79337	0.41	0.66	2.01923	55 to 64	Female	Short-cycle tertiary	Divorced	Rural
127	6	8	5	7	9	6	0.31, 0.40	0.56, 0.65	0.31	0.40	0.56	0.65	4.7943	3.69685	0.355	0.605	4.24557	Over 65	Female	Short-cycle tertiary	Married	Urban
128	6	7	3	7	8	4	0.26, 0.36	0.60, 0.70	0.26	0.36	0.60	0.70	2.26605	1.78385	0.31	0.65	2.02495	55 to 64	Female	Lower secondary	Never married	Urban
129	5	7	3	6	8	4	0.21, 0.31	0.55, 0.64	0.21	0.31	0.55	0.64	2.28175	1.7828	0.26	0.595	2.03228	15 to 24	Male	Below lower secondary	Never married	Rural
130	6	7	4	7	8	5	0.26, 0.36	0.60, 0.70	0.26	0.36	0.60	0.70	3.67068	2.26605	0.31	0.65	2.96837	45 to 54	Female	Lower secondary	Never married	Urban
131	7	9	4	8	10	5	0.41, 0.50	0.56, 0.66	0.41	0.50	0.56	0.66	3.77586	2.24035	0.455	0.61	3.0081	35 to 44	Male	Upper secondary	Divorced	Urban
132	7	9	4	8	10	5	0.41, 0.50	0.56, 0.66	0.41	0.50	0.56	0.66	3.77586	2.24035	0.455	0.61	3.0081	15 to 24	Female	Bachelor	Never married	Rural
133	6	8	3	7	9	4	0.31, 0.40	0.56, 0.65	0.31	0.40	0.56	0.65	2.25487	1.78688	0.355	0.605	2.02087	15 to 24	Female	Short-cycle tertiary	Married	Urban
134	6	7	4	7	8	5	0.26, 0.36	0.60, 0.70	0.26	0.36	0.60	0.70	3.67068	2.26605	0.31	0.65	2.96837	25 to 34	Female	Upper secondary	Divorced	Urban
135	6	7	4	7	8	5	0.26, 0.36	0.60, 0.70	0.26	0.36	0.60	0.70	3.67068	2.26605	0.31	0.65	2.96837	55 to 64	Female	Below lower secondary	Never married	Rural
136	7	9	4	8	10	5	0.41, 0.50	0.56, 0.66	0.41	0.50	0.56	0.66	3.77586	2.24035	0.455	0.61	3.0081	35 to 44	Female	Lower secondary	Never married	Urban
137	6	7	3	7	8	4	0.26, 0.36	0.60, 0.70	0.26	0.36	0.60	0.70	2.26605	1.78385	0.31	0.65	2.02495	25 to 34	Female	Short-cycle tertiary	Never married	Urban
138	6	7	3	7	8	4	0.26, 0.36	0.60, 0.70	0.26	0.36	0.60	0.70	2.26605	1.78385	0.31	0.65	2.02495	45 to 54	Female	Upper secondary	Married	Urban
139	6	7	2	7	8	3	0.26, 0.36	0.60, 0.70	0.26	0.36	0.60	0.70	1.78385	1.48139	0.31	0.65	1.63262	15 to 24	Male	Short-cycle tertiary	Never married	Rural
140	6	7	2	7	8	3	0.26, 0.36	0.60, 0.70	0.26	0.36	0.60	0.70	1.78385	1.48139	0.31	0.65	1.63262	55 to 64	Male	Upper secondary	Never married	Rural
141	6	7	2	7	8	3	0.26, 0.36	0.60, 0.70	0.26	0.36	0.60	0.70	1.78385	1.48139	0.31	0.65	1.63262	45 to 54	Male	Below lower secondary	Divorced	Urban
142	6	7	4	7	8	5	0.26, 0.36	0.60, 0.70	0.26	0.36	0.60	0.70	3.67068	2.26605	0.31	0.65	2.96837	45 to 54	Female	Below lower secondary	Widowed	Urban
143	6	7	4	7	8	5	0.26, 0.36	0.60, 0.70	0.26	0.36	0.60	0.70	3.67068	2.26605	0.31	0.65	2.96837	Over 65	Female	Upper secondary	Divorced	Rural
144	7	9	2	8	10	3	0.41, 0.50	0.56, 0.66	0.41	0.50	0.56	0.66	1.80109	1.42343	0.455	0.61	1.61226	15 to 24	Female	Bachelor	Widowed	Urban
145	5	7	4	6	8	5	0.21, 0.31	0.55, 0.64	0.21	0.31	0.55	0.64	3.64793	2.28175	0.26	0.595	2.96484	45 to 54	Male	Graduate	Divorced	Urban
146	6	7	4	7	8	5	0.26, 0.36	0.60, 0.70	0.26	0.36	0.60	0.70	3.67068	2.26605	0.31	0.65	2.96837	45 to 54	Male	Below lower secondary	Married	Rural
147	4	7	3	5	8	4	0.15, 0.26	0.49, 0.59	0.15	0.26	0.49	0.59	2.30293	1.78431	0.205	0.54	2.04362	Over 65	Female	Upper secondary	Never married	Rural
148	6	7	4	7	8	5	0.26, 0.36	0.60, 0.70	0.26	0.36	0.60	0.70	3.67068	2.26605	0.31	0.65	2.96837	55 to 64	Male	Graduate	Divorced	Urban
149	6	9	4	7	10	5	0.36, 0.45	0.51, 0.61	0.36	0.45	0.51	0.61	3.73262	2.2458	0.405	0.56	2.98921	25 to 34	Female	Short-cycle tertiary	Never married	Rural
150	6	9	2	7	10	3	0.36, 0.45	0.51, 0.61	0.36	0.45	0.51	0.61	1.79265	1.44279	0.405	0.56	1.61772	25 to 34	Male	Short-cycle tertiary	Divorced	Rural
151	6	10	6	7	11	7	0.41, 0.51	0.45, 0.55	0.41	0.51	0.45	0.55	13.4025	4.86448	0.46	0.5	9.13348	Over 65	Female	Short-cycle tertiary	Widowed	Rural
152	6	9	4	7	10	5	0.36, 0.45	0.51, 0.61	0.36	0.45	0.51	0.61	3.73262	2.2458	0.405	0.56	2.98921	55 to 64	Female	Lower secondary	Divorced	Urban
153	6	7	5	7	8	6	0.26, 0.36	0.60, 0.70	0.26	0.36	0.60	0.70	4.77667	3.67068	0.31	0.65	4.22367	45 to 54	Female	Bachelor	Divorced	Rural
154	7	6	3	8	7	4	0.25, 0.36	0.71, 0.82	0.25	0.36	0.71	0.82	2.26747	1.78364	0.305	0.765	2.02555	35 to 44	Female	Short-cycle tertiary	Divorced	Urban
155	6	7	3	7	8	4	0.26, 0.36	0.60, 0.70	0.26	0.36	0.60	0.70	2.26605	1.78385	0.31	0.65	2.02495	55 to 64	Female	Short-cycle tertiary	Widowed	Urban
156	7	9	3	8	10	4	0.41, 0.50	0.56, 0.66	0.41	0.50	0.56	0.66	2.24035	1.80109	0.455	0.61	2.02072	Over 65	Female	Bachelor	Never married	Rural
157	5	7	3	6	8	4	0.21, 0.31	0.55, 0.64	0.21	0.31	0.55	0.64	2.28175	1.7828	0.26	0.595	2.03228	35 to 44	Male	Lower secondary	Married	Rural
158	6	7	2	7	8	3	0.26, 0.36	0.60, 0.70	0.26	0.36	0.60	0.70	1.78385	1.48139	0.31	0.65	1.63262	45 to 54	Male	Short-cycle tertiary	Divorced	Urban
159	6	7	4	7	8	5	0.26, 0.36	0.60, 0.70	0.26	0.36	0.60	0.70	3.67068	2.26605	0.31	0.65	2.96837	35 to 44	Male	Graduate	Never married	Rural
160	7	6	4	8	7	5	0.25, 0.36	0.71, 0.82	0.25	0.36	0.71	0.82	3.66811	2.26747	0.305	0.765	2.96779	25 to 34	Male	Graduate	Widowed	Rural
161	6	7	3	7	8	4	0.26, 0.36	0.60, 0.70	0.26	0.36	0.60	0.70	2.26605	1.78385	0.31	0.65	2.02495	Over 65	Male	Graduate	Widowed	Rural
162	6	7	4	7	8	5	0.26, 0.36	0.60, 0.70	0.26	0.36	0.60	0.70	3.67068	2.26605	0.31	0.65	2.96837	45 to 54	Female	Bachelor	Divorced	Urban
163	7	8	3	8	9	4	0.37, 0.45	0.62, 0.70	0.37	0.45	0.62	0.70	2.24509	1.79337	0.41	0.66	2.01923	55 to 64	Male	Upper secondary	Widowed	Urban
164	6	7	4	7	8	5	0.26, 0.36	0.60, 0.70	0.26	0.36	0.60	0.70	3.67068	2.26605	0.31	0.65	2.96837	55 to 64	Male	Upper secondary	Married	Rural
165	6	9	5	7	10	6	0.36, 0.45	0.51, 0.61	0.36	0.45	0.51	0.61	4.82249	3.73262	0.405	0.56	4.27755	Over 65	Male	Bachelor	Married	Urban
166	6	7	4	7	8	5	0.26, 0.36	0.60, 0.70	0.26	0.36	0.60	0.70	3.67068	2.26605	0.31	0.65	2.96837	55 to 64	Male	Upper secondary	Widowed	Rural
167	5	7	3	6	8	4	0.21, 0.31	0.55, 0.64	0.21	0.31	0.55	0.64	2.28175	1.7828	0.26	0.595	2.03228	15 to 24	Male	Below lower secondary	Married	Rural
168	7	9	4	8	10	5	0.41, 0.50	0.56, 0.66	0.41	0.50	0.56	0.66	3.77586	2.24035	0.455	0.61	3.0081	35 to 44	Female	Graduate	Married	Rural
169	7	6	4	8	7	5	0.25, 0.36	0.71, 0.82	0.25	0.36	0.71	0.82	3.66811	2.26747	0.305	0.765	2.96779	35 to 44	Male	Graduate	Widowed	Rural
170	7	6	4	8	7	5	0.25, 0.36	0.71, 0.82	0.25	0.36	0.71	0.82	3.66811	2.26747	0.305	0.765	2.96779	25 to 34	Male	Bachelor	Married	Rural
171	7	6	2	8	7	3	0.25, 0.36	0.71, 0.82	0.25	0.36	0.71	0.82	1.78364	1.48349	0.305	0.765	1.63357	45 to 54	Female	Below lower secondary	Divorced	Urban
172	5	7	2	6	8	3	0.21, 0.31	0.55, 0.64	0.21	0.31	0.55	0.64	1.7828	1.5027	0.26	0.595	1.64275	Over 65	Female	Lower secondary	Married	Urban
173	5	7	3	6	8	4	0.21, 0.31	0.55, 0.64	0.21	0.31	0.55	0.64	2.28175	1.7828	0.26	0.595	2.03228	Over 65	Male	Lower secondary	Divorced	Urban
174	6	7	4	7	8	5	0.26, 0.36	0.60, 0.70	0.26	0.36	0.60	0.70	3.67068	2.26605	0.31	0.65	2.96837	55 to 64	Male	Bachelor	Widowed	Urban
175	6	7	3	7	8	4	0.26, 0.36	0.60, 0.70	0.26	0.36	0.60	0.70	2.26605	1.78385	0.31	0.65	2.02495	Over 65	Male	Lower secondary	Married	Rural
176	7	8	4	8	9	5	0.37, 0.45	0.62, 0.70	0.37	0.45	0.62	0.70	3.7366	2.24509	0.41	0.66	2.99085	45 to 54	Female	Bachelor	Never married	Urban
177	6	7	4	7	8	5	0.26, 0.36	0.60, 0.70	0.26	0.36	0.60	0.70	3.67068	2.26605	0.31	0.65	2.96837	35 to 44	Male	Graduate	Never married	Urban
178	6	7	2	7	8	3	0.26, 0.36	0.60, 0.70	0.26	0.36	0.60	0.70	1.78385	1.48139	0.31	0.65	1.63262	15 to 24	Female	Short-cycle tertiary	Widowed	Urban
179	7	9	4	8	10	5	0.41, 0.50	0.56, 0.66	0.41	0.50	0.56	0.66	3.77586	2.24035	0.455	0.61	3.0081	15 to 24	Male	Graduate	Widowed	Rural
180	6	7	3	7	8	4	0.26, 0.36	0.60, 0.70	0.26	0.36	0.60	0.70	2.26605	1.78385	0.31	0.65	2.02495	45 to 54	Male	Graduate	Widowed	Rural
181	5	7	2	6	8	3	0.21, 0.31	0.55, 0.64	0.21	0.31	0.55	0.64	1.7828	1.5027	0.26	0.595	1.64275	45 to 54	Male	Below lower secondary	Divorced	Rural
182	7	6	4	8	7	5	0.25, 0.36	0.71, 0.82	0.25	0.36	0.71	0.82	3.66811	2.26747	0.305	0.765	2.96779	45 to 54	Female	Bachelor	Never married	Rural
183	6	7	4	7	8	5	0.26, 0.36	0.60, 0.70	0.26	0.36	0.60	0.70	3.67068	2.26605	0.31	0.65	2.96837	35 to 44	Male	Lower secondary	Married	Urban
184	6	7	3	7	8	4	0.26, 0.36	0.60, 0.70	0.26	0.36	0.60	0.70	2.26605	1.78385	0.31	0.65	2.02495	55 to 64	Female	Upper secondary	Married	Rural
185	5	7	3	6	8	4	0.21, 0.31	0.55, 0.64	0.21	0.31	0.55	0.64	2.28175	1.7828	0.26	0.595	2.03228	Over 65	Female	Lower secondary	Never married	Urban
186	6	7	4	7	8	5	0.26, 0.36	0.60, 0.70	0.26	0.36	0.60	0.70	3.67068	2.26605	0.31	0.65	2.96837	15 to 24	Female	Lower secondary	Widowed	Rural
187	6	7	3	7	8	4	0.26, 0.36	0.60, 0.70	0.26	0.36	0.60	0.70	2.26605	1.78385	0.31	0.65	2.02495	35 to 44	Male	Below lower secondary	Married	Urban
188	6	7	4	7	8	5	0.26, 0.36	0.60, 0.70	0.26	0.36	0.60	0.70	3.67068	2.26605	0.31	0.65	2.96837	35 to 44	Male	Bachelor	Married	Urban
189	6	7	2	7	8	3	0.26, 0.36	0.60, 0.70	0.26	0.36	0.60	0.70	1.78385	1.48139	0.31	0.65	1.63262	15 to 24	Female	Bachelor	Widowed	Rural
190	6	7	4	7	8	5	0.26, 0.36	0.60, 0.70	0.26	0.36	0.60	0.70	3.67068	2.26605	0.31	0.65	2.96837	45 to 54	Male	Graduate	Divorced	Urban
191	7	9	4	8	10	5	0.41, 0.50	0.56, 0.66	0.41	0.50	0.56	0.66	3.77586	2.24035	0.455	0.61	3.0081	55 to 64	Male	Upper secondary	Widowed	Urban
192	5	7	3	6	8	4	0.21, 0.31	0.55, 0.64	0.21	0.31	0.55	0.64	2.28175	1.7828	0.26	0.595	2.03228	25 to 34	Female	Lower secondary	Widowed	Urban
193	6	7	3	7	8	4	0.26, 0.36	0.60, 0.70	0.26	0.36	0.60	0.70	2.26605	1.78385	0.31	0.65	2.02495	35 to 44	Female	Short-cycle tertiary	Never married	Urban
194	6	8	4	7	9	5	0.31, 0.40	0.56, 0.65	0.31	0.40	0.56	0.65	3.69685	2.25487	0.355	0.605	2.97586	55 to 64	Male	Short-cycle tertiary	Married	Urban
195	7	9	3	8	10	4	0.41, 0.50	0.56, 0.66	0.41	0.50	0.56	0.66	2.24035	1.80109	0.455	0.61	2.02072	Over 65	Male	Lower secondary	Never married	Urban
196	7	9	4	8	10	5	0.41, 0.50	0.56, 0.66	0.41	0.50	0.56	0.66	3.77586	2.24035	0.455	0.61	3.0081	55 to 64	Female	Lower secondary	Never married	Urban
197	6	7	4	7	8	5	0.26, 0.36	0.60, 0.70	0.26	0.36	0.60	0.70	3.67068	2.26605	0.31	0.65	2.96837	35 to 44	Male	Graduate	Married	Urban
198	6	9	3	7	10	4	0.36, 0.45	0.51, 0.61	0.36	0.45	0.51	0.61	2.2458	1.79265	0.405	0.56	2.01922	Over 65	Male	Bachelor	Married	Rural
199	4	7	2	5	8	3	0.15, 0.26	0.49, 0.59	0.15	0.26	0.49	0.59	1.78431	1.52694	0.205	0.54	1.65563	Over 65	Male	Below lower secondary	Widowed	Urban
200	5	7	3	6	8	4	0.21, 0.31	0.55, 0.64	0.21	0.31	0.55	0.64	2.28175	1.7828	0.26	0.595	2.03228	55 to 64	Male	Lower secondary	Widowed	Urban
201	6	7	4	7	8	5	0.26, 0.36	0.60, 0.70	0.26	0.36	0.60	0.70	3.67068	2.26605	0.31	0.65	2.96837	45 to 54	Female	Lower secondary	Divorced	Rural
202	10	7	3	11	8	4	0.46, 1.00	0.75, 1.89	0.46	1.00	0.75	1.89	2.28021	1.90193	0.73	1.32	2.09107	25 to 34	Male	Below lower secondary	Widowed	Urban
203	5	7	3	6	8	4	0.21, 0.31	0.55, 0.64	0.21	0.31	0.55	0.64	2.28175	1.7828	0.26	0.595	2.03228	25 to 34	Female	Lower secondary	Married	Rural
204	5	7	4	6	8	5	0.21, 0.31	0.55, 0.64	0.21	0.31	0.55	0.64	3.64793	2.28175	0.26	0.595	2.96484	25 to 34	Female	Bachelor	Married	Rural
205	6	7	4	7	8	5	0.26, 0.36	0.60, 0.70	0.26	0.36	0.60	0.70	3.67068	2.26605	0.31	0.65	2.96837	Over 65	Male	Bachelor	Widowed	Urban
206	6	7	4	7	8	5	0.26, 0.36	0.60, 0.70	0.26	0.36	0.60	0.70	3.67068	2.26605	0.31	0.65	2.96837	25 to 34	Female	Lower secondary	Never married	Urban
207	6	7	3	7	8	4	0.26, 0.36	0.60, 0.70	0.26	0.36	0.60	0.70	2.26605	1.78385	0.31	0.65	2.02495	15 to 24	Female	Lower secondary	Widowed	Urban
208	6	7	4	7	8	5	0.26, 0.36	0.60, 0.70	0.26	0.36	0.60	0.70	3.67068	2.26605	0.31	0.65	2.96837	45 to 54	Male	Graduate	Married	Rural
209	7	6	4	8	7	5	0.25, 0.36	0.71, 0.82	0.25	0.36	0.71	0.82	3.66811	2.26747	0.305	0.765	2.96779	15 to 24	Male	Graduate	Widowed	Urban
210	6	8	5	7	9	6	0.31, 0.40	0.56, 0.65	0.31	0.40	0.56	0.65	4.7943	3.69685	0.355	0.605	4.24557	Over 65	Female	Short-cycle tertiary	Never married	Rural
211	6	7	4	7	8	5	0.26, 0.36	0.60, 0.70	0.26	0.36	0.60	0.70	3.67068	2.26605	0.31	0.65	2.96837	55 to 64	Male	Short-cycle tertiary	Divorced	Rural
212	5	7	4	6	8	5	0.21, 0.31	0.55, 0.64	0.21	0.31	0.55	0.64	3.64793	2.28175	0.26	0.595	2.96484	55 to 64	Female	Graduate	Divorced	Urban
213	6	8	4	7	9	5	0.31, 0.40	0.56, 0.65	0.31	0.40	0.56	0.65	3.69685	2.25487	0.355	0.605	2.97586	45 to 54	Male	Upper secondary	Divorced	Rural
214	7	6	4	8	7	5	0.25, 0.36	0.71, 0.82	0.25	0.36	0.71	0.82	3.66811	2.26747	0.305	0.765	2.96779	35 to 44	Female	Graduate	Divorced	Rural
215	6	7	2	7	8	3	0.26, 0.36	0.60, 0.70	0.26	0.36	0.60	0.70	1.78385	1.48139	0.31	0.65	1.63262	45 to 54	Female	Below lower secondary	Divorced	Urban
216	6	7	4	7	8	5	0.26, 0.36	0.60, 0.70	0.26	0.36	0.60	0.70	3.67068	2.26605	0.31	0.65	2.96837	45 to 54	Female	Short-cycle tertiary	Married	Urban
217	5	7	2	6	8	3	0.21, 0.31	0.55, 0.64	0.21	0.31	0.55	0.64	1.7828	1.5027	0.26	0.595	1.64275	15 to 24	Male	Lower secondary	Never married	Rural
218	6	7	5	7	8	6	0.26, 0.36	0.60, 0.70	0.26	0.36	0.60	0.70	4.77667	3.67068	0.31	0.65	4.22367	Over 65	Male	Short-cycle tertiary	Divorced	Urban
219	5	7	3	6	8	4	0.21, 0.31	0.55, 0.64	0.21	0.31	0.55	0.64	2.28175	1.7828	0.26	0.595	2.03228	15 to 24	Female	Lower secondary	Never married	Urban
220	5	7	3	6	8	4	0.21, 0.31	0.55, 0.64	0.21	0.31	0.55	0.64	2.28175	1.7828	0.26	0.595	2.03228	55 to 64	Male	Upper secondary	Divorced	Urban
221	6	7	5	7	8	6	0.26, 0.36	0.60, 0.70	0.26	0.36	0.60	0.70	4.77667	3.67068	0.31	0.65	4.22367	45 to 54	Female	Graduate	Married	Rural
222	7	9	3	8	10	4	0.41, 0.50	0.56, 0.66	0.41	0.50	0.56	0.66	2.24035	1.80109	0.455	0.61	2.02072	15 to 24	Male	Upper secondary	Married	Rural
223	6	7	4	7	8	5	0.26, 0.36	0.60, 0.70	0.26	0.36	0.60	0.70	3.67068	2.26605	0.31	0.65	2.96837	35 to 44	Male	Below lower secondary	Widowed	Rural
224	6	7	2	7	8	3	0.26, 0.36	0.60, 0.70	0.26	0.36	0.60	0.70	1.78385	1.48139	0.31	0.65	1.63262	25 to 34	Female	Upper secondary	Divorced	Urban
225	6	7	3	7	8	4	0.26, 0.36	0.60, 0.70	0.26	0.36	0.60	0.70	2.26605	1.78385	0.31	0.65	2.02495	45 to 54	Male	Below lower secondary	Married	Urban
226	7	6	3	8	7	4	0.25, 0.36	0.71, 0.82	0.25	0.36	0.71	0.82	2.26747	1.78364	0.305	0.765	2.02555	45 to 54	Male	Short-cycle tertiary	Married	Urban
227	6	7	5	7	8	6	0.26, 0.36	0.60, 0.70	0.26	0.36	0.60	0.70	4.77667	3.67068	0.31	0.65	4.22367	25 to 34	Male	Graduate	Never married	Rural
228	6	7	4	7	8	5	0.26, 0.36	0.60, 0.70	0.26	0.36	0.60	0.70	3.67068	2.26605	0.31	0.65	2.96837	45 to 54	Female	Short-cycle tertiary	Widowed	Rural
229	6	7	4	7	8	5	0.26, 0.36	0.60, 0.70	0.26	0.36	0.60	0.70	3.67068	2.26605	0.31	0.65	2.96837	55 to 64	Male	Graduate	Never married	Urban
230	6	7	4	7	8	5	0.26, 0.36	0.60, 0.70	0.26	0.36	0.60	0.70	3.67068	2.26605	0.31	0.65	2.96837	25 to 34	Male	Lower secondary	Widowed	Urban
231	7	9	3	8	10	4	0.41, 0.50	0.56, 0.66	0.41	0.50	0.56	0.66	2.24035	1.80109	0.455	0.61	2.02072	15 to 24	Male	Lower secondary	Never married	Urban
232	5	7	2	6	8	3	0.21, 0.31	0.55, 0.64	0.21	0.31	0.55	0.64	1.7828	1.5027	0.26	0.595	1.64275	15 to 24	Female	Below lower secondary	Divorced	Rural
233	7	6	4	8	7	5	0.25, 0.36	0.71, 0.82	0.25	0.36	0.71	0.82	3.66811	2.26747	0.305	0.765	2.96779	35 to 44	Female	Short-cycle tertiary	Married	Urban
234	5	7	3	6	8	4	0.21, 0.31	0.55, 0.64	0.21	0.31	0.55	0.64	2.28175	1.7828	0.26	0.595	2.03228	Over 65	Male	Below lower secondary	Widowed	Urban
235	7	9	4	8	10	5	0.41, 0.50	0.56, 0.66	0.41	0.50	0.56	0.66	3.77586	2.24035	0.455	0.61	3.0081	25 to 34	Male	Upper secondary	Married	Urban
236	6	8	4	7	9	5	0.31, 0.40	0.56, 0.65	0.31	0.40	0.56	0.65	3.69685	2.25487	0.355	0.605	2.97586	15 to 24	Female	Bachelor	Divorced	Urban
237	6	7	3	7	8	4	0.26, 0.36	0.60, 0.70	0.26	0.36	0.60	0.70	2.26605	1.78385	0.31	0.65	2.02495	15 to 24	Female	Short-cycle tertiary	Married	Urban
238	6	10	4	7	11	5	0.41, 0.51	0.45, 0.55	0.41	0.51	0.45	0.55	3.78061	2.24	0.46	0.5	3.01031	25 to 34	Female	Short-cycle tertiary	Never married	Rural
239	5	7	3	6	8	4	0.21, 0.31	0.55, 0.64	0.21	0.31	0.55	0.64	2.28175	1.7828	0.26	0.595	2.03228	Over 65	Female	Lower secondary	Divorced	Urban
240	7	8	4	8	9	5	0.37, 0.45	0.62, 0.70	0.37	0.45	0.62	0.70	3.7366	2.24509	0.41	0.66	2.99085	55 to 64	Female	Graduate	Widowed	Urban
241	7	9	3	8	10	4	0.41, 0.50	0.56, 0.66	0.41	0.50	0.56	0.66	2.24035	1.80109	0.455	0.61	2.02072	45 to 54	Female	Short-cycle tertiary	Widowed	Rural
242	7	6	3	8	7	4	0.25, 0.36	0.71, 0.82	0.25	0.36	0.71	0.82	2.26747	1.78364	0.305	0.765	2.02555	25 to 34	Male	Upper secondary	Married	Rural
243	7	9	4	8	10	5	0.41, 0.50	0.56, 0.66	0.41	0.50	0.56	0.66	3.77586	2.24035	0.455	0.61	3.0081	35 to 44	Male	Below lower secondary	Married	Rural
244	6	7	2	7	8	3	0.26, 0.36	0.60, 0.70	0.26	0.36	0.60	0.70	1.78385	1.48139	0.31	0.65	1.63262	35 to 44	Male	Below lower secondary	Never married	Urban
245	5	7	3	6	8	4	0.21, 0.31	0.55, 0.64	0.21	0.31	0.55	0.64	2.28175	1.7828	0.26	0.595	2.03228	Over 65	Male	Lower secondary	Widowed	Rural
246	7	6	3	8	7	4	0.25, 0.36	0.71, 0.82	0.25	0.36	0.71	0.82	2.26747	1.78364	0.305	0.765	2.02555	25 to 34	Female	Graduate	Widowed	Urban
247	6	7	4	7	8	5	0.26, 0.36	0.60, 0.70	0.26	0.36	0.60	0.70	3.67068	2.26605	0.31	0.65	2.96837	45 to 54	Female	Lower secondary	Never married	Urban
248	7	8	4	8	9	5	0.37, 0.45	0.62, 0.70	0.37	0.45	0.62	0.70	3.7366	2.24509	0.41	0.66	2.99085	55 to 64	Male	Upper secondary	Divorced	Rural
249	6	7	4	7	8	5	0.26, 0.36	0.60, 0.70	0.26	0.36	0.60	0.70	3.67068	2.26605	0.31	0.65	2.96837	55 to 64	Female	Lower secondary	Married	Urban
250	6	7	4	7	8	5	0.26, 0.36	0.60, 0.70	0.26	0.36	0.60	0.70	3.67068	2.26605	0.31	0.65	2.96837	35 to 44	Female	Lower secondary	Widowed	Urban
251	6	7	3	7	8	4	0.26, 0.36	0.60, 0.70	0.26	0.36	0.60	0.70	2.26605	1.78385	0.31	0.65	2.02495	25 to 34	Female	Below lower secondary	Widowed	Urban
252	6	7	3	7	8	4	0.26, 0.36	0.60, 0.70	0.26	0.36	0.60	0.70	2.26605	1.78385	0.31	0.65	2.02495	25 to 34	Female	Below lower secondary	Never married	Urban
253	6	7	3	7	8	4	0.26, 0.36	0.60, 0.70	0.26	0.36	0.60	0.70	2.26605	1.78385	0.31	0.65	2.02495	15 to 24	Female	Upper secondary	Married	Rural
254	7	9	4	8	10	5	0.41, 0.50	0.56, 0.66	0.41	0.50	0.56	0.66	3.77586	2.24035	0.455	0.61	3.0081	35 to 44	Female	Bachelor	Married	Urban
255	7	6	3	8	7	4	0.25, 0.36	0.71, 0.82	0.25	0.36	0.71	0.82	2.26747	1.78364	0.305	0.765	2.02555	25 to 34	Male	Short-cycle tertiary	Never married	Urban
256	6	7	2	7	8	3	0.26, 0.36	0.60, 0.70	0.26	0.36	0.60	0.70	1.78385	1.48139	0.31	0.65	1.63262	55 to 64	Female	Short-cycle tertiary	Widowed	Urban
257	6	7	4	7	8	5	0.26, 0.36	0.60, 0.70	0.26	0.36	0.60	0.70	3.67068	2.26605	0.31	0.65	2.96837	25 to 34	Female	Bachelor	Married	Urban
258	6	7	3	7	8	4	0.26, 0.36	0.60, 0.70	0.26	0.36	0.60	0.70	2.26605	1.78385	0.31	0.65	2.02495	15 to 24	Female	Bachelor	Divorced	Rural
259	5	7	2	6	8	3	0.21, 0.31	0.55, 0.64	0.21	0.31	0.55	0.64	1.7828	1.5027	0.26	0.595	1.64275	25 to 34	Male	Below lower secondary	Never married	Rural
260	6	9	4	7	10	5	0.36, 0.45	0.51, 0.61	0.36	0.45	0.51	0.61	3.73262	2.2458	0.405	0.56	2.98921	Over 65	Male	Short-cycle tertiary	Widowed	Urban
261	9	7	3	10	8	4	0.40, 1.00	0.75, 1.89	0.40	1.00	0.75	1.89	2.26971	1.88595	0.7	1.32	2.07783	25 to 34	Male	Short-cycle tertiary	Divorced	Urban
262	6	7	2	7	8	3	0.26, 0.36	0.60, 0.70	0.26	0.36	0.60	0.70	1.78385	1.48139	0.31	0.65	1.63262	15 to 24	Male	Short-cycle tertiary	Married	Rural
263	6	9	4	7	10	5	0.36, 0.45	0.51, 0.61	0.36	0.45	0.51	0.61	3.73262	2.2458	0.405	0.56	2.98921	Over 65	Female	Upper secondary	Widowed	Rural
264	6	8	4	7	9	5	0.31, 0.40	0.56, 0.65	0.31	0.40	0.56	0.65	3.69685	2.25487	0.355	0.605	2.97586	25 to 34	Female	Graduate	Widowed	Urban
265	6	7	4	7	8	5	0.26, 0.36	0.60, 0.70	0.26	0.36	0.60	0.70	3.67068	2.26605	0.31	0.65	2.96837	35 to 44	Male	Below lower secondary	Never married	Rural
266	6	7	3	7	8	4	0.26, 0.36	0.60, 0.70	0.26	0.36	0.60	0.70	2.26605	1.78385	0.31	0.65	2.02495	35 to 44	Female	Below lower secondary	Married	Rural
267	5	7	3	6	8	4	0.21, 0.31	0.55, 0.64	0.21	0.31	0.55	0.64	2.28175	1.7828	0.26	0.595	2.03228	25 to 34	Female	Lower secondary	Widowed	Urban
268	7	8	4	8	9	5	0.37, 0.45	0.62, 0.70	0.37	0.45	0.62	0.70	3.7366	2.24509	0.41	0.66	2.99085	35 to 44	Male	Upper secondary	Divorced	Rural
269	5	7	4	6	8	5	0.21, 0.31	0.55, 0.64	0.21	0.31	0.55	0.64	3.64793	2.28175	0.26	0.595	2.96484	25 to 34	Male	Bachelor	Married	Rural
270	7	9	3	8	10	4	0.41, 0.50	0.56, 0.66	0.41	0.50	0.56	0.66	2.24035	1.80109	0.455	0.61	2.02072	55 to 64	Male	Bachelor	Widowed	Urban
271	6	7	5	7	8	6	0.26, 0.36	0.60, 0.70	0.26	0.36	0.60	0.70	4.77667	3.67068	0.31	0.65	4.22367	Over 65	Female	Graduate	Married	Urban
272	7	6	4	8	7	5	0.25, 0.36	0.71, 0.82	0.25	0.36	0.71	0.82	3.66811	2.26747	0.305	0.765	2.96779	45 to 54	Male	Graduate	Divorced	Urban
273	6	7	4	7	8	5	0.26, 0.36	0.60, 0.70	0.26	0.36	0.60	0.70	3.67068	2.26605	0.31	0.65	2.96837	35 to 44	Male	Below lower secondary	Married	Urban
274	6	8	4	7	9	5	0.31, 0.40	0.56, 0.65	0.31	0.40	0.56	0.65	3.69685	2.25487	0.355	0.605	2.97586	Over 65	Female	Short-cycle tertiary	Married	Urban
275	7	9	3	8	10	4	0.41, 0.50	0.56, 0.66	0.41	0.50	0.56	0.66	2.24035	1.80109	0.455	0.61	2.02072	35 to 44	Male	Short-cycle tertiary	Divorced	Rural
276	6	7	3	7	8	4	0.26, 0.36	0.60, 0.70	0.26	0.36	0.60	0.70	2.26605	1.78385	0.31	0.65	2.02495	45 to 54	Male	Short-cycle tertiary	Widowed	Urban
277	6	7	3	7	8	4	0.26, 0.36	0.60, 0.70	0.26	0.36	0.60	0.70	2.26605	1.78385	0.31	0.65	2.02495	55 to 64	Female	Graduate	Widowed	Urban
278	6	8	4	7	9	5	0.31, 0.40	0.56, 0.65	0.31	0.40	0.56	0.65	3.69685	2.25487	0.355	0.605	2.97586	15 to 24	Female	Upper secondary	Never married	Rural
279	7	9	3	8	10	4	0.41, 0.50	0.56, 0.66	0.41	0.50	0.56	0.66	2.24035	1.80109	0.455	0.61	2.02072	15 to 24	Male	Upper secondary	Widowed	Urban
280	6	7	4	7	8	5	0.26, 0.36	0.60, 0.70	0.26	0.36	0.60	0.70	3.67068	2.26605	0.31	0.65	2.96837	45 to 54	Female	Graduate	Divorced	Urban
281	6	8	4	7	9	5	0.31, 0.40	0.56, 0.65	0.31	0.40	0.56	0.65	3.69685	2.25487	0.355	0.605	2.97586	15 to 24	Male	Bachelor	Divorced	Rural
282	7	8	3	8	9	4	0.37, 0.45	0.62, 0.70	0.37	0.45	0.62	0.70	2.24509	1.79337	0.41	0.66	2.01923	Over 65	Male	Short-cycle tertiary	Never married	Rural
283	7	6	4	8	7	5	0.25, 0.36	0.71, 0.82	0.25	0.36	0.71	0.82	3.66811	2.26747	0.305	0.765	2.96779	Over 65	Male	Graduate	Widowed	Urban
284	6	7	5	7	8	6	0.26, 0.36	0.60, 0.70	0.26	0.36	0.60	0.70	4.77667	3.67068	0.31	0.65	4.22367	55 to 64	Male	Graduate	Divorced	Rural
285	4	9	3	5	10	4	0.26, 0.36	0.40, 0.50	0.26	0.36	0.40	0.50	2.26605	1.78385	0.31	0.45	2.02495	Over 65	Male	Lower secondary	Widowed	Rural
286	6	7	4	7	8	5	0.26, 0.36	0.60, 0.70	0.26	0.36	0.60	0.70	3.67068	2.26605	0.31	0.65	2.96837	35 to 44	Male	Lower secondary	Widowed	Urban
287	6	7	3	7	8	4	0.26, 0.36	0.60, 0.70	0.26	0.36	0.60	0.70	2.26605	1.78385	0.31	0.65	2.02495	25 to 34	Male	Short-cycle tertiary	Never married	Urban
288	6	7	4	7	8	5	0.26, 0.36	0.60, 0.70	0.26	0.36	0.60	0.70	3.67068	2.26605	0.31	0.65	2.96837	45 to 54	Male	Bachelor	Widowed	Urban
289	5	7	3	6	8	4	0.21, 0.31	0.55, 0.64	0.21	0.31	0.55	0.64	2.28175	1.7828	0.26	0.595	2.03228	Over 65	Male	Lower secondary	Married	Urban
290	7	9	4	8	10	5	0.41, 0.50	0.56, 0.66	0.41	0.50	0.56	0.66	3.77586	2.24035	0.455	0.61	3.0081	35 to 44	Female	Graduate	Never married	Urban
291	7	9	4	8	10	5	0.41, 0.50	0.56, 0.66	0.41	0.50	0.56	0.66	3.77586	2.24035	0.455	0.61	3.0081	45 to 54	Male	Bachelor	Never married	Urban
292	6	7	3	7	8	4	0.26, 0.36	0.60, 0.70	0.26	0.36	0.60	0.70	2.26605	1.78385	0.31	0.65	2.02495	25 to 34	Male	Below lower secondary	Never married	Urban
293	6	7	4	7	8	5	0.26, 0.36	0.60, 0.70	0.26	0.36	0.60	0.70	3.67068	2.26605	0.31	0.65	2.96837	15 to 24	Female	Below lower secondary	Married	Rural
294	6	7	2	7	8	3	0.26, 0.36	0.60, 0.70	0.26	0.36	0.60	0.70	1.78385	1.48139	0.31	0.65	1.63262	55 to 64	Female	Short-cycle tertiary	Never married	Urban
295	7	6	4	8	7	5	0.25, 0.36	0.71, 0.82	0.25	0.36	0.71	0.82	3.66811	2.26747	0.305	0.765	2.96779	35 to 44	Male	Graduate	Divorced	Rural
296	6	7	4	7	8	5	0.26, 0.36	0.60, 0.70	0.26	0.36	0.60	0.70	3.67068	2.26605	0.31	0.65	2.96837	25 to 34	Female	Lower secondary	Divorced	Urban
297	6	7	3	7	8	4	0.26, 0.36	0.60, 0.70	0.26	0.36	0.60	0.70	2.26605	1.78385	0.31	0.65	2.02495	Over 65	Male	Graduate	Never married	Rural
298	6	9	3	7	10	4	0.36, 0.45	0.51, 0.61	0.36	0.45	0.51	0.61	2.2458	1.79265	0.405	0.56	2.01922	Over 65	Male	Bachelor	Divorced	Rural
299	7	6	4	8	7	5	0.25, 0.36	0.71, 0.82	0.25	0.36	0.71	0.82	3.66811	2.26747	0.305	0.765	2.96779	35 to 44	Male	Below lower secondary	Never married	Urban
300	6	7	4	7	8	5	0.26, 0.36	0.60, 0.70	0.26	0.36	0.60	0.70	3.67068	2.26605	0.31	0.65	2.96837	25 to 34	Female	Upper secondary	Never married	Urban

## Sheet: feature-gemini
	S1	S2	S3	S1-corrected	S2-corrected	S3-corrected	sigma range	alpha range	sigma lower bound	sigma upper bound	alpha lower bound	alpha upper bound	lambda upper bound	lambda lower bound	sigma	alpha	lambda	Age	Gender	Education	Marital Status	Location
16	1	1	1	2	2	2	-0.42, -0.27	0.59, 0.69	-0.4	0.27	0.59	0.69	1.65872	0.397325	-0.065	0.64	1.02802	45 to 54	Male	Graduate	Never married	Rural
83	1	1	1	2	2	2	-0.42, -0.27	0.59, 0.69	-0.4	0.27	0.59	0.69	1.65872	0.397325	-0.065	0.64	1.02802	15 to 24	Female	Lower secondary	Never married	Urban
145	1	1	1	2	2	2	-0.42, -0.27	0.59, 0.69	-0.4	0.27	0.59	0.69	1.65872	0.397325	-0.065	0.64	1.02802	45 to 54	Male	Graduate	Divorced	Urban
171	1	1	1	2	2	2	-0.42, -0.27	0.59, 0.69	-0.4	0.27	0.59	0.69	1.65872	0.397325	-0.065	0.64	1.02802	45 to 54	Female	Below lower secondary	Divorced	Urban
51	9	14	2	10	15	3	#N/A	#N/A	#N/A	#N/A	#N/A	#N/A	#N/A	#N/A	#N/A	#N/A	#N/A	45 to 54	Female	Below lower secondary	Never married	Rural
119	5	5	2	6	6	3	0.10, 0.19	0.65, 0.74	0.10	0.19	0.65	0.74	1.789	1.55437	0.145	0.695	1.67169	55 to 64	Male	Below lower secondary	Divorced	Rural
124	4	4	2	5	5	3	-0.01, 0.09	0.63, 0.72	-0.0	0.09	0.63	0.72	1.80344	1.60241	0.045	0.675	1.70293	Over 65	Male	Below lower secondary	Never married	Urban
220	10	10	2	11	11	3	0.58, 1.00	0.65, 1.89	0.58	1.00	0.65	1.89	1.93802	1.3099	0.79	1.27	1.62396	55 to 64	Male	Upper secondary	Divorced	Urban
226	10	10	2	11	11	3	0.58, 1.00	0.65, 1.89	0.58	1.00	0.65	1.89	1.93802	1.3099	0.79	1.27	1.62396	45 to 54	Male	Short-cycle tertiary	Married	Urban
250	8	14	2	9	15	3	#N/A	#N/A	#N/A	#N/A	#N/A	#N/A	#N/A	#N/A	#N/A	#N/A	#N/A	35 to 44	Female	Lower secondary	Widowed	Urban
271	7	14	2	8	15	3	#N/A	#N/A	#N/A	#N/A	#N/A	#N/A	#N/A	#N/A	#N/A	#N/A	#N/A	Over 65	Female	Graduate	Married	Urban
1	10	10	3	11	11	4	0.58, 1.00	0.65, 1.89	0.58	1.00	0.65	1.89	1.93802	1.3099	0.79	1.27	1.62396	25 to 34	Female	Below lower secondary	Never married	Rural
2	10	11	3	11	12	4	0.63, 1.00	0.59, 1.89	0.63	1.00	0.59	1.89	1.95476	1.3025	0.815	1.24	1.62863	15 to 24	Female	Upper secondary	Never married	Rural
3	10	10	3	11	11	4	0.58, 1.00	0.65, 1.89	0.58	1.00	0.65	1.89	1.93802	1.3099	0.79	1.27	1.62396	45 to 54	Male	Short-cycle tertiary	Widowed	Urban
4	10	10	3	11	11	4	0.58, 1.00	0.65, 1.89	0.58	1.00	0.65	1.89	1.93802	1.3099	0.79	1.27	1.62396	55 to 64	Female	Below lower secondary	Never married	Urban
5	10	10	3	11	11	4	0.58, 1.00	0.65, 1.89	0.58	1.00	0.65	1.89	1.93802	1.3099	0.79	1.27	1.62396	25 to 34	Male	Short-cycle tertiary	Married	Urban
7	3	14	3	4	15	4	#N/A	#N/A	#N/A	#N/A	#N/A	#N/A	#N/A	#N/A	#N/A	#N/A	#N/A	Over 65	Female	Graduate	Never married	Urban
8	7	7	3	8	8	4	0.32, 0.41	0.66, 0.75	0.32	0.41	0.66	0.75	1.78782	1.45875	0.365	0.705	1.62328	Over 65	Male	Short-cycle tertiary	Widowed	Rural
10	10	10	3	11	11	4	0.58, 1.00	0.65, 1.89	0.58	1.00	0.65	1.89	1.93802	1.3099	0.79	1.27	1.62396	45 to 54	Male	Lower secondary	Divorced	Urban
11	10	11	3	11	12	4	0.63, 1.00	0.59, 1.89	0.63	1.00	0.59	1.89	1.95476	1.3025	0.815	1.24	1.62863	15 to 24	Female	Upper secondary	Divorced	Urban
13	10	10	3	11	11	4	0.58, 1.00	0.65, 1.89	0.58	1.00	0.65	1.89	1.93802	1.3099	0.79	1.27	1.62396	35 to 44	Male	Below lower secondary	Divorced	Rural
14	10	10	3	11	11	4	0.58, 1.00	0.65, 1.89	0.58	1.00	0.65	1.89	1.93802	1.3099	0.79	1.27	1.62396	45 to 54	Male	Short-cycle tertiary	Never married	Rural
17	10	10	3	11	11	4	0.58, 1.00	0.65, 1.89	0.58	1.00	0.65	1.89	1.93802	1.3099	0.79	1.27	1.62396	55 to 64	Female	Lower secondary	Never married	Urban
21	10	10	3	11	11	4	0.58, 1.00	0.65, 1.89	0.58	1.00	0.65	1.89	1.93802	1.3099	0.79	1.27	1.62396	45 to 54	Male	Below lower secondary	Divorced	Rural
24	10	10	3	11	11	4	0.58, 1.00	0.65, 1.89	0.58	1.00	0.65	1.89	1.93802	1.3099	0.79	1.27	1.62396	55 to 64	Female	Short-cycle tertiary	Widowed	Rural
27	10	10	3	11	11	4	0.58, 1.00	0.65, 1.89	0.58	1.00	0.65	1.89	1.93802	1.3099	0.79	1.27	1.62396	55 to 64	Male	Bachelor	Divorced	Rural
29	10	10	3	11	11	4	0.58, 1.00	0.65, 1.89	0.58	1.00	0.65	1.89	1.93802	1.3099	0.79	1.27	1.62396	35 to 44	Male	Graduate	Widowed	Urban
30	9	9	3	10	10	4	0.49, 1.00	0.65, 1.89	0.49	1.00	0.65	1.89	1.91043	1.32359	0.745	1.27	1.61701	35 to 44	Male	Bachelor	Divorced	Rural
33	10	10	3	11	11	4	0.58, 1.00	0.65, 1.89	0.58	1.00	0.65	1.89	1.93802	1.3099	0.79	1.27	1.62396	35 to 44	Male	Bachelor	Divorced	Rural
34	7	7	3	8	8	4	0.32, 0.41	0.66, 0.75	0.32	0.41	0.66	0.75	1.78782	1.45875	0.365	0.705	1.62328	45 to 54	Male	Short-cycle tertiary	Widowed	Urban
35	10	10	3	11	11	4	0.58, 1.00	0.65, 1.89	0.58	1.00	0.65	1.89	1.93802	1.3099	0.79	1.27	1.62396	25 to 34	Female	Upper secondary	Married	Rural
36	10	10	3	11	11	4	0.58, 1.00	0.65, 1.89	0.58	1.00	0.65	1.89	1.93802	1.3099	0.79	1.27	1.62396	55 to 64	Male	Lower secondary	Divorced	Rural
38	10	10	3	11	11	4	0.58, 1.00	0.65, 1.89	0.58	1.00	0.65	1.89	1.93802	1.3099	0.79	1.27	1.62396	55 to 64	Female	Below lower secondary	Widowed	Rural
39	10	10	3	11	11	4	0.58, 1.00	0.65, 1.89	0.58	1.00	0.65	1.89	1.93802	1.3099	0.79	1.27	1.62396	45 to 54	Female	Below lower secondary	Married	Rural
42	9	9	3	10	10	4	0.49, 1.00	0.65, 1.89	0.49	1.00	0.65	1.89	1.91043	1.32359	0.745	1.27	1.61701	25 to 34	Female	Graduate	Married	Urban
43	10	10	3	11	11	4	0.58, 1.00	0.65, 1.89	0.58	1.00	0.65	1.89	1.93802	1.3099	0.79	1.27	1.62396	Over 65	Female	Graduate	Divorced	Urban
45	10	10	3	11	11	4	0.58, 1.00	0.65, 1.89	0.58	1.00	0.65	1.89	1.93802	1.3099	0.79	1.27	1.62396	25 to 34	Female	Upper secondary	Never married	Rural
49	10	10	3	11	11	4	0.58, 1.00	0.65, 1.89	0.58	1.00	0.65	1.89	1.93802	1.3099	0.79	1.27	1.62396	Over 65	Female	Graduate	Widowed	Rural
50	10	10	3	11	11	4	0.58, 1.00	0.65, 1.89	0.58	1.00	0.65	1.89	1.93802	1.3099	0.79	1.27	1.62396	35 to 44	Female	Upper secondary	Divorced	Rural
52	10	10	3	11	11	4	0.58, 1.00	0.65, 1.89	0.58	1.00	0.65	1.89	1.93802	1.3099	0.79	1.27	1.62396	45 to 54	Female	Graduate	Divorced	Rural
54	10	10	3	11	11	4	0.58, 1.00	0.65, 1.89	0.58	1.00	0.65	1.89	1.93802	1.3099	0.79	1.27	1.62396	45 to 54	Male	Bachelor	Never married	Urban
57	10	10	3	11	11	4	0.58, 1.00	0.65, 1.89	0.58	1.00	0.65	1.89	1.93802	1.3099	0.79	1.27	1.62396	15 to 24	Female	Upper secondary	Divorced	Urban
58	10	10	3	11	11	4	0.58, 1.00	0.65, 1.89	0.58	1.00	0.65	1.89	1.93802	1.3099	0.79	1.27	1.62396	Over 65	Male	Lower secondary	Widowed	Rural
61	10	10	3	11	11	4	0.58, 1.00	0.65, 1.89	0.58	1.00	0.65	1.89	1.93802	1.3099	0.79	1.27	1.62396	45 to 54	Female	Lower secondary	Never married	Urban
62	7	7	3	8	8	4	0.32, 0.41	0.66, 0.75	0.32	0.41	0.66	0.75	1.78782	1.45875	0.365	0.705	1.62328	45 to 54	Male	Graduate	Divorced	Urban
64	7	7	3	8	8	4	0.32, 0.41	0.66, 0.75	0.32	0.41	0.66	0.75	1.78782	1.45875	0.365	0.705	1.62328	35 to 44	Male	Lower secondary	Divorced	Rural
67	10	10	3	11	11	4	0.58, 1.00	0.65, 1.89	0.58	1.00	0.65	1.89	1.93802	1.3099	0.79	1.27	1.62396	Over 65	Male	Lower secondary	Married	Rural
69	10	10	3	11	11	4	0.58, 1.00	0.65, 1.89	0.58	1.00	0.65	1.89	1.93802	1.3099	0.79	1.27	1.62396	25 to 34	Female	Below lower secondary	Divorced	Rural
74	10	10	3	11	11	4	0.58, 1.00	0.65, 1.89	0.58	1.00	0.65	1.89	1.93802	1.3099	0.79	1.27	1.62396	35 to 44	Female	Graduate	Married	Urban
77	4	14	3	5	15	4	#N/A	#N/A	#N/A	#N/A	#N/A	#N/A	#N/A	#N/A	#N/A	#N/A	#N/A	Over 65	Male	Short-cycle tertiary	Widowed	Rural
78	7	7	3	8	8	4	0.32, 0.41	0.66, 0.75	0.32	0.41	0.66	0.75	1.78782	1.45875	0.365	0.705	1.62328	Over 65	Female	Graduate	Married	Urban
80	10	10	3	11	11	4	0.58, 1.00	0.65, 1.89	0.58	1.00	0.65	1.89	1.93802	1.3099	0.79	1.27	1.62396	45 to 54	Male	Short-cycle tertiary	Divorced	Urban
81	10	10	3	11	11	4	0.58, 1.00	0.65, 1.89	0.58	1.00	0.65	1.89	1.93802	1.3099	0.79	1.27	1.62396	45 to 54	Female	Bachelor	Divorced	Urban
82	10	10	3	11	11	4	0.58, 1.00	0.65, 1.89	0.58	1.00	0.65	1.89	1.93802	1.3099	0.79	1.27	1.62396	35 to 44	Male	Graduate	Married	Rural
84	10	10	3	11	11	4	0.58, 1.00	0.65, 1.89	0.58	1.00	0.65	1.89	1.93802	1.3099	0.79	1.27	1.62396	45 to 54	Male	Lower secondary	Never married	Rural
86	10	14	3	11	15	4	#N/A	#N/A	#N/A	#N/A	#N/A	#N/A	#N/A	#N/A	#N/A	#N/A	#N/A	15 to 24	Female	Graduate	Married	Urban
90	10	10	3	11	11	4	0.58, 1.00	0.65, 1.89	0.58	1.00	0.65	1.89	1.93802	1.3099	0.79	1.27	1.62396	Over 65	Female	Short-cycle tertiary	Widowed	Urban
95	10	10	3	11	11	4	0.58, 1.00	0.65, 1.89	0.58	1.00	0.65	1.89	1.93802	1.3099	0.79	1.27	1.62396	55 to 64	Female	Below lower secondary	Married	Urban
98	10	10	3	11	11	4	0.58, 1.00	0.65, 1.89	0.58	1.00	0.65	1.89	1.93802	1.3099	0.79	1.27	1.62396	55 to 64	Male	Upper secondary	Never married	Urban
101	10	10	3	11	11	4	0.58, 1.00	0.65, 1.89	0.58	1.00	0.65	1.89	1.93802	1.3099	0.79	1.27	1.62396	Over 65	Female	Short-cycle tertiary	Married	Rural
102	10	10	3	11	11	4	0.58, 1.00	0.65, 1.89	0.58	1.00	0.65	1.89	1.93802	1.3099	0.79	1.27	1.62396	15 to 24	Female	Bachelor	Never married	Rural
104	10	10	3	11	11	4	0.58, 1.00	0.65, 1.89	0.58	1.00	0.65	1.89	1.93802	1.3099	0.79	1.27	1.62396	55 to 64	Female	Below lower secondary	Widowed	Urban
106	10	10	3	11	11	4	0.58, 1.00	0.65, 1.89	0.58	1.00	0.65	1.89	1.93802	1.3099	0.79	1.27	1.62396	55 to 64	Female	Lower secondary	Never married	Urban
108	10	10	3	11	11	4	0.58, 1.00	0.65, 1.89	0.58	1.00	0.65	1.89	1.93802	1.3099	0.79	1.27	1.62396	45 to 54	Female	Graduate	Divorced	Rural
109	10	10	3	11	11	4	0.58, 1.00	0.65, 1.89	0.58	1.00	0.65	1.89	1.93802	1.3099	0.79	1.27	1.62396	35 to 44	Female	Upper secondary	Married	Rural
110	10	10	3	11	11	4	0.58, 1.00	0.65, 1.89	0.58	1.00	0.65	1.89	1.93802	1.3099	0.79	1.27	1.62396	25 to 34	Female	Short-cycle tertiary	Never married	Urban
113	10	10	3	11	11	4	0.58, 1.00	0.65, 1.89	0.58	1.00	0.65	1.89	1.93802	1.3099	0.79	1.27	1.62396	Over 65	Female	Below lower secondary	Married	Rural
114	10	10	3	11	11	4	0.58, 1.00	0.65, 1.89	0.58	1.00	0.65	1.89	1.93802	1.3099	0.79	1.27	1.62396	55 to 64	Male	Bachelor	Never married	Rural
117	10	10	3	11	11	4	0.58, 1.00	0.65, 1.89	0.58	1.00	0.65	1.89	1.93802	1.3099	0.79	1.27	1.62396	25 to 34	Male	Bachelor	Divorced	Urban
118	10	10	3	11	11	4	0.58, 1.00	0.65, 1.89	0.58	1.00	0.65	1.89	1.93802	1.3099	0.79	1.27	1.62396	15 to 24	Male	Short-cycle tertiary	Never married	Urban
120	10	10	3	11	11	4	0.58, 1.00	0.65, 1.89	0.58	1.00	0.65	1.89	1.93802	1.3099	0.79	1.27	1.62396	45 to 54	Female	Graduate	Widowed	Urban
121	10	10	3	11	11	4	0.58, 1.00	0.65, 1.89	0.58	1.00	0.65	1.89	1.93802	1.3099	0.79	1.27	1.62396	Over 65	Female	Short-cycle tertiary	Widowed	Urban
122	10	10	3	11	11	4	0.58, 1.00	0.65, 1.89	0.58	1.00	0.65	1.89	1.93802	1.3099	0.79	1.27	1.62396	25 to 34	Male	Bachelor	Married	Urban
123	10	10	3	11	11	4	0.58, 1.00	0.65, 1.89	0.58	1.00	0.65	1.89	1.93802	1.3099	0.79	1.27	1.62396	35 to 44	Male	Lower secondary	Married	Rural
125	10	10	3	11	11	4	0.58, 1.00	0.65, 1.89	0.58	1.00	0.65	1.89	1.93802	1.3099	0.79	1.27	1.62396	45 to 54	Female	Lower secondary	Married	Rural
128	10	10	3	11	11	4	0.58, 1.00	0.65, 1.89	0.58	1.00	0.65	1.89	1.93802	1.3099	0.79	1.27	1.62396	55 to 64	Female	Lower secondary	Never married	Urban
129	10	10	3	11	11	4	0.58, 1.00	0.65, 1.89	0.58	1.00	0.65	1.89	1.93802	1.3099	0.79	1.27	1.62396	15 to 24	Male	Below lower secondary	Never married	Rural
132	10	10	3	11	11	4	0.58, 1.00	0.65, 1.89	0.58	1.00	0.65	1.89	1.93802	1.3099	0.79	1.27	1.62396	15 to 24	Female	Bachelor	Never married	Rural
134	7	14	3	8	15	4	#N/A	#N/A	#N/A	#N/A	#N/A	#N/A	#N/A	#N/A	#N/A	#N/A	#N/A	25 to 34	Female	Upper secondary	Divorced	Urban
135	10	10	3	11	11	4	0.58, 1.00	0.65, 1.89	0.58	1.00	0.65	1.89	1.93802	1.3099	0.79	1.27	1.62396	55 to 64	Female	Below lower secondary	Never married	Rural
136	10	10	3	11	11	4	0.58, 1.00	0.65, 1.89	0.58	1.00	0.65	1.89	1.93802	1.3099	0.79	1.27	1.62396	35 to 44	Female	Lower secondary	Never married	Urban
141	10	10	3	11	11	4	0.58, 1.00	0.65, 1.89	0.58	1.00	0.65	1.89	1.93802	1.3099	0.79	1.27	1.62396	45 to 54	Male	Below lower secondary	Divorced	Urban
142	10	10	3	11	11	4	0.58, 1.00	0.65, 1.89	0.58	1.00	0.65	1.89	1.93802	1.3099	0.79	1.27	1.62396	45 to 54	Female	Below lower secondary	Widowed	Urban
143	7	7	3	8	8	4	0.32, 0.41	0.66, 0.75	0.32	0.41	0.66	0.75	1.78782	1.45875	0.365	0.705	1.62328	Over 65	Female	Upper secondary	Divorced	Rural
146	10	10	3	11	11	4	0.58, 1.00	0.65, 1.89	0.58	1.00	0.65	1.89	1.93802	1.3099	0.79	1.27	1.62396	45 to 54	Male	Below lower secondary	Married	Rural
147	10	10	3	11	11	4	0.58, 1.00	0.65, 1.89	0.58	1.00	0.65	1.89	1.93802	1.3099	0.79	1.27	1.62396	Over 65	Female	Upper secondary	Never married	Rural
150	10	10	3	11	11	4	0.58, 1.00	0.65, 1.89	0.58	1.00	0.65	1.89	1.93802	1.3099	0.79	1.27	1.62396	25 to 34	Male	Short-cycle tertiary	Divorced	Rural
153	10	10	3	11	11	4	0.58, 1.00	0.65, 1.89	0.58	1.00	0.65	1.89	1.93802	1.3099	0.79	1.27	1.62396	45 to 54	Female	Bachelor	Divorced	Rural
155	7	7	3	8	8	4	0.32, 0.41	0.66, 0.75	0.32	0.41	0.66	0.75	1.78782	1.45875	0.365	0.705	1.62328	55 to 64	Female	Short-cycle tertiary	Widowed	Urban
157	10	10	3	11	11	4	0.58, 1.00	0.65, 1.89	0.58	1.00	0.65	1.89	1.93802	1.3099	0.79	1.27	1.62396	35 to 44	Male	Lower secondary	Married	Rural
160	6	14	3	7	15	4	#N/A	#N/A	#N/A	#N/A	#N/A	#N/A	#N/A	#N/A	#N/A	#N/A	#N/A	25 to 34	Male	Graduate	Widowed	Rural
161	10	10	3	11	11	4	0.58, 1.00	0.65, 1.89	0.58	1.00	0.65	1.89	1.93802	1.3099	0.79	1.27	1.62396	Over 65	Male	Graduate	Widowed	Rural
162	10	10	3	11	11	4	0.58, 1.00	0.65, 1.89	0.58	1.00	0.65	1.89	1.93802	1.3099	0.79	1.27	1.62396	45 to 54	Female	Bachelor	Divorced	Urban
164	10	10	3	11	11	4	0.58, 1.00	0.65, 1.89	0.58	1.00	0.65	1.89	1.93802	1.3099	0.79	1.27	1.62396	55 to 64	Male	Upper secondary	Married	Rural
165	10	10	3	11	11	4	0.58, 1.00	0.65, 1.89	0.58	1.00	0.65	1.89	1.93802	1.3099	0.79	1.27	1.62396	Over 65	Male	Bachelor	Married	Urban
166	10	10	3	11	11	4	0.58, 1.00	0.65, 1.89	0.58	1.00	0.65	1.89	1.93802	1.3099	0.79	1.27	1.62396	55 to 64	Male	Upper secondary	Widowed	Rural
167	10	10	3	11	11	4	0.58, 1.00	0.65, 1.89	0.58	1.00	0.65	1.89	1.93802	1.3099	0.79	1.27	1.62396	15 to 24	Male	Below lower secondary	Married	Rural
168	10	10	3	11	11	4	0.58, 1.00	0.65, 1.89	0.58	1.00	0.65	1.89	1.93802	1.3099	0.79	1.27	1.62396	35 to 44	Female	Graduate	Married	Rural
170	10	10	3	11	11	4	0.58, 1.00	0.65, 1.89	0.58	1.00	0.65	1.89	1.93802	1.3099	0.79	1.27	1.62396	25 to 34	Male	Bachelor	Married	Rural
172	10	10	3	11	11	4	0.58, 1.00	0.65, 1.89	0.58	1.00	0.65	1.89	1.93802	1.3099	0.79	1.27	1.62396	Over 65	Female	Lower secondary	Married	Urban
173	10	10	3	11	11	4	0.58, 1.00	0.65, 1.89	0.58	1.00	0.65	1.89	1.93802	1.3099	0.79	1.27	1.62396	Over 65	Male	Lower secondary	Divorced	Urban
176	10	10	3	11	11	4	0.58, 1.00	0.65, 1.89	0.58	1.00	0.65	1.89	1.93802	1.3099	0.79	1.27	1.62396	45 to 54	Female	Bachelor	Never married	Urban
182	10	10	3	11	11	4	0.58, 1.00	0.65, 1.89	0.58	1.00	0.65	1.89	1.93802	1.3099	0.79	1.27	1.62396	45 to 54	Female	Bachelor	Never married	Rural
183	8	14	3	9	15	4	#N/A	#N/A	#N/A	#N/A	#N/A	#N/A	#N/A	#N/A	#N/A	#N/A	#N/A	35 to 44	Male	Lower secondary	Married	Urban
185	10	10	3	11	11	4	0.58, 1.00	0.65, 1.89	0.58	1.00	0.65	1.89	1.93802	1.3099	0.79	1.27	1.62396	Over 65	Female	Lower secondary	Never married	Urban
186	10	10	3	11	11	4	0.58, 1.00	0.65, 1.89	0.58	1.00	0.65	1.89	1.93802	1.3099	0.79	1.27	1.62396	15 to 24	Female	Lower secondary	Widowed	Rural
188	10	10	3	11	11	4	0.58, 1.00	0.65, 1.89	0.58	1.00	0.65	1.89	1.93802	1.3099	0.79	1.27	1.62396	35 to 44	Male	Bachelor	Married	Urban
189	10	10	3	11	11	4	0.58, 1.00	0.65, 1.89	0.58	1.00	0.65	1.89	1.93802	1.3099	0.79	1.27	1.62396	15 to 24	Female	Bachelor	Widowed	Rural
190	10	10	3	11	11	4	0.58, 1.00	0.65, 1.89	0.58	1.00	0.65	1.89	1.93802	1.3099	0.79	1.27	1.62396	45 to 54	Male	Graduate	Divorced	Urban
193	10	10	3	11	11	4	0.58, 1.00	0.65, 1.89	0.58	1.00	0.65	1.89	1.93802	1.3099	0.79	1.27	1.62396	35 to 44	Female	Short-cycle tertiary	Never married	Urban
195	10	10	3	11	11	4	0.58, 1.00	0.65, 1.89	0.58	1.00	0.65	1.89	1.93802	1.3099	0.79	1.27	1.62396	Over 65	Male	Lower secondary	Never married	Urban
196	10	10	3	11	11	4	0.58, 1.00	0.65, 1.89	0.58	1.00	0.65	1.89	1.93802	1.3099	0.79	1.27	1.62396	55 to 64	Female	Lower secondary	Never married	Urban
199	10	10	3	11	11	4	0.58, 1.00	0.65, 1.89	0.58	1.00	0.65	1.89	1.93802	1.3099	0.79	1.27	1.62396	Over 65	Male	Below lower secondary	Widowed	Urban
200	10	10	3	11	11	4	0.58, 1.00	0.65, 1.89	0.58	1.00	0.65	1.89	1.93802	1.3099	0.79	1.27	1.62396	55 to 64	Male	Lower secondary	Widowed	Urban
202	10	10	3	11	11	4	0.58, 1.00	0.65, 1.89	0.58	1.00	0.65	1.89	1.93802	1.3099	0.79	1.27	1.62396	25 to 34	Male	Below lower secondary	Widowed	Urban
203	10	10	3	11	11	4	0.58, 1.00	0.65, 1.89	0.58	1.00	0.65	1.89	1.93802	1.3099	0.79	1.27	1.62396	25 to 34	Female	Lower secondary	Married	Rural
206	10	10	3	11	11	4	0.58, 1.00	0.65, 1.89	0.58	1.00	0.65	1.89	1.93802	1.3099	0.79	1.27	1.62396	25 to 34	Female	Lower secondary	Never married	Urban
213	10	10	3	11	11	4	0.58, 1.00	0.65, 1.89	0.58	1.00	0.65	1.89	1.93802	1.3099	0.79	1.27	1.62396	45 to 54	Male	Upper secondary	Divorced	Rural
215	10	10	3	11	11	4	0.58, 1.00	0.65, 1.89	0.58	1.00	0.65	1.89	1.93802	1.3099	0.79	1.27	1.62396	45 to 54	Female	Below lower secondary	Divorced	Urban
216	10	13	3	11	14	4	0.71, 1.00	0.48, 1.89	0.71	1.00	0.48	1.89	1.98373	1.29094	0.855	1.185	1.63733	45 to 54	Female	Short-cycle tertiary	Married	Urban
221	10	10	3	11	11	4	0.58, 1.00	0.65, 1.89	0.58	1.00	0.65	1.89	1.93802	1.3099	0.79	1.27	1.62396	45 to 54	Female	Graduate	Married	Rural
222	10	14	3	11	15	4	#N/A	#N/A	#N/A	#N/A	#N/A	#N/A	#N/A	#N/A	#N/A	#N/A	#N/A	15 to 24	Male	Upper secondary	Married	Rural
223	10	10	3	11	11	4	0.58, 1.00	0.65, 1.89	0.58	1.00	0.65	1.89	1.93802	1.3099	0.79	1.27	1.62396	35 to 44	Male	Below lower secondary	Widowed	Rural
225	10	10	3	11	11	4	0.58, 1.00	0.65, 1.89	0.58	1.00	0.65	1.89	1.93802	1.3099	0.79	1.27	1.62396	45 to 54	Male	Below lower secondary	Married	Urban
230	10	10	3	11	11	4	0.58, 1.00	0.65, 1.89	0.58	1.00	0.65	1.89	1.93802	1.3099	0.79	1.27	1.62396	25 to 34	Male	Lower secondary	Widowed	Urban
231	10	10	3	11	11	4	0.58, 1.00	0.65, 1.89	0.58	1.00	0.65	1.89	1.93802	1.3099	0.79	1.27	1.62396	15 to 24	Male	Lower secondary	Never married	Urban
232	10	10	3	11	11	4	0.58, 1.00	0.65, 1.89	0.58	1.00	0.65	1.89	1.93802	1.3099	0.79	1.27	1.62396	15 to 24	Female	Below lower secondary	Divorced	Rural
233	10	10	3	11	11	4	0.58, 1.00	0.65, 1.89	0.58	1.00	0.65	1.89	1.93802	1.3099	0.79	1.27	1.62396	35 to 44	Female	Short-cycle tertiary	Married	Urban
234	3	11	3	4	12	4	0.34, 0.43	0.24, 0.34	0.34	0.43	0.24	0.34	1.79003	1.45071	0.385	0.29	1.62037	Over 65	Male	Below lower secondary	Widowed	Urban
235	10	10	3	11	11	4	0.58, 1.00	0.65, 1.89	0.58	1.00	0.65	1.89	1.93802	1.3099	0.79	1.27	1.62396	25 to 34	Male	Upper secondary	Married	Urban
241	9	10	3	10	11	4	0.54, 1.00	0.59, 1.89	0.54	1.00	0.59	1.89	1.92536	1.31593	0.77	1.24	1.62065	45 to 54	Female	Short-cycle tertiary	Widowed	Rural
243	10	10	3	11	11	4	0.58, 1.00	0.65, 1.89	0.58	1.00	0.65	1.89	1.93802	1.3099	0.79	1.27	1.62396	35 to 44	Male	Below lower secondary	Married	Rural
245	10	10	3	11	11	4	0.58, 1.00	0.65, 1.89	0.58	1.00	0.65	1.89	1.93802	1.3099	0.79	1.27	1.62396	Over 65	Male	Lower secondary	Widowed	Rural
247	10	10	3	11	11	4	0.58, 1.00	0.65, 1.89	0.58	1.00	0.65	1.89	1.93802	1.3099	0.79	1.27	1.62396	45 to 54	Female	Lower secondary	Never married	Urban
248	10	10	3	11	11	4	0.58, 1.00	0.65, 1.89	0.58	1.00	0.65	1.89	1.93802	1.3099	0.79	1.27	1.62396	55 to 64	Male	Upper secondary	Divorced	Rural
249	10	10	3	11	11	4	0.58, 1.00	0.65, 1.89	0.58	1.00	0.65	1.89	1.93802	1.3099	0.79	1.27	1.62396	55 to 64	Female	Lower secondary	Married	Urban
251	10	10	3	11	11	4	0.58, 1.00	0.65, 1.89	0.58	1.00	0.65	1.89	1.93802	1.3099	0.79	1.27	1.62396	25 to 34	Female	Below lower secondary	Widowed	Urban
254	7	14	3	8	15	4	#N/A	#N/A	#N/A	#N/A	#N/A	#N/A	#N/A	#N/A	#N/A	#N/A	#N/A	35 to 44	Female	Bachelor	Married	Urban
259	10	10	3	11	11	4	0.58, 1.00	0.65, 1.89	0.58	1.00	0.65	1.89	1.93802	1.3099	0.79	1.27	1.62396	25 to 34	Male	Below lower secondary	Never married	Rural
260	10	10	3	11	11	4	0.58, 1.00	0.65, 1.89	0.58	1.00	0.65	1.89	1.93802	1.3099	0.79	1.27	1.62396	Over 65	Male	Short-cycle tertiary	Widowed	Urban
262	10	10	3	11	11	4	0.58, 1.00	0.65, 1.89	0.58	1.00	0.65	1.89	1.93802	1.3099	0.79	1.27	1.62396	15 to 24	Male	Short-cycle tertiary	Married	Rural
265	10	11	3	11	12	4	0.63, 1.00	0.59, 1.89	0.63	1.00	0.59	1.89	1.95476	1.3025	0.815	1.24	1.62863	35 to 44	Male	Below lower secondary	Never married	Rural
266	10	10	3	11	11	4	0.58, 1.00	0.65, 1.89	0.58	1.00	0.65	1.89	1.93802	1.3099	0.79	1.27	1.62396	35 to 44	Female	Below lower secondary	Married	Rural
268	10	10	3	11	11	4	0.58, 1.00	0.65, 1.89	0.58	1.00	0.65	1.89	1.93802	1.3099	0.79	1.27	1.62396	35 to 44	Male	Upper secondary	Divorced	Rural
269	5	14	3	6	15	4	#N/A	#N/A	#N/A	#N/A	#N/A	#N/A	#N/A	#N/A	#N/A	#N/A	#N/A	25 to 34	Male	Bachelor	Married	Rural
270	10	10	3	11	11	4	0.58, 1.00	0.65, 1.89	0.58	1.00	0.65	1.89	1.93802	1.3099	0.79	1.27	1.62396	55 to 64	Male	Bachelor	Widowed	Urban
273	10	10	3	11	11	4	0.58, 1.00	0.65, 1.89	0.58	1.00	0.65	1.89	1.93802	1.3099	0.79	1.27	1.62396	35 to 44	Male	Below lower secondary	Married	Urban
277	10	10	3	11	11	4	0.58, 1.00	0.65, 1.89	0.58	1.00	0.65	1.89	1.93802	1.3099	0.79	1.27	1.62396	55 to 64	Female	Graduate	Widowed	Urban
278	10	10	3	11	11	4	0.58, 1.00	0.65, 1.89	0.58	1.00	0.65	1.89	1.93802	1.3099	0.79	1.27	1.62396	15 to 24	Female	Upper secondary	Never married	Rural
280	10	10	3	11	11	4	0.58, 1.00	0.65, 1.89	0.58	1.00	0.65	1.89	1.93802	1.3099	0.79	1.27	1.62396	45 to 54	Female	Graduate	Divorced	Urban
281	7	7	3	8	8	4	0.32, 0.41	0.66, 0.75	0.32	0.41	0.66	0.75	1.78782	1.45875	0.365	0.705	1.62328	15 to 24	Male	Bachelor	Divorced	Rural
282	10	10	3	11	11	4	0.58, 1.00	0.65, 1.89	0.58	1.00	0.65	1.89	1.93802	1.3099	0.79	1.27	1.62396	Over 65	Male	Short-cycle tertiary	Never married	Rural
283	10	10	3	11	11	4	0.58, 1.00	0.65, 1.89	0.58	1.00	0.65	1.89	1.93802	1.3099	0.79	1.27	1.62396	Over 65	Male	Graduate	Widowed	Urban
284	10	10	3	11	11	4	0.58, 1.00	0.65, 1.89	0.58	1.00	0.65	1.89	1.93802	1.3099	0.79	1.27	1.62396	55 to 64	Male	Graduate	Divorced	Rural
285	10	10	3	11	11	4	0.58, 1.00	0.65, 1.89	0.58	1.00	0.65	1.89	1.93802	1.3099	0.79	1.27	1.62396	Over 65	Male	Lower secondary	Widowed	Rural
286	10	10	3	11	11	4	0.58, 1.00	0.65, 1.89	0.58	1.00	0.65	1.89	1.93802	1.3099	0.79	1.27	1.62396	35 to 44	Male	Lower secondary	Widowed	Urban
287	9	9	3	10	10	4	0.49, 1.00	0.65, 1.89	0.49	1.00	0.65	1.89	1.91043	1.32359	0.745	1.27	1.61701	25 to 34	Male	Short-cycle tertiary	Never married	Urban
289	10	10	3	11	11	4	0.58, 1.00	0.65, 1.89	0.58	1.00	0.65	1.89	1.93802	1.3099	0.79	1.27	1.62396	Over 65	Male	Lower secondary	Married	Urban
294	10	10	3	11	11	4	0.58, 1.00	0.65, 1.89	0.58	1.00	0.65	1.89	1.93802	1.3099	0.79	1.27	1.62396	55 to 64	Female	Short-cycle tertiary	Never married	Urban
295	10	10	3	11	11	4	0.58, 1.00	0.65, 1.89	0.58	1.00	0.65	1.89	1.93802	1.3099	0.79	1.27	1.62396	35 to 44	Male	Graduate	Divorced	Rural
296	10	10	3	11	11	4	0.58, 1.00	0.65, 1.89	0.58	1.00	0.65	1.89	1.93802	1.3099	0.79	1.27	1.62396	25 to 34	Female	Lower secondary	Divorced	Urban
297	10	10	3	11	11	4	0.58, 1.00	0.65, 1.89	0.58	1.00	0.65	1.89	1.93802	1.3099	0.79	1.27	1.62396	Over 65	Male	Graduate	Never married	Rural
298	10	10	3	11	11	4	0.58, 1.00	0.65, 1.89	0.58	1.00	0.65	1.89	1.93802	1.3099	0.79	1.27	1.62396	Over 65	Male	Bachelor	Divorced	Rural
299	10	10	3	11	11	4	0.58, 1.00	0.65, 1.89	0.58	1.00	0.65	1.89	1.93802	1.3099	0.79	1.27	1.62396	35 to 44	Male	Below lower secondary	Never married	Urban
6	10	10	4	11	11	5	0.58, 1.00	0.65, 1.89	0.58	1.00	0.65	1.89	4.29988	2.30614	0.79	1.27	3.30301	15 to 24	Female	Bachelor	Never married	Urban
12	10	10	4	11	11	5	0.58, 1.00	0.65, 1.89	0.58	1.00	0.65	1.89	4.29988	2.30614	0.79	1.27	3.30301	25 to 34	Female	Short-cycle tertiary	Divorced	Rural
19	10	10	4	11	11	5	0.58, 1.00	0.65, 1.89	0.58	1.00	0.65	1.89	4.29988	2.30614	0.79	1.27	3.30301	35 to 44	Female	Upper secondary	Married	Rural
26	10	10	4	11	11	5	0.58, 1.00	0.65, 1.89	0.58	1.00	0.65	1.89	4.29988	2.30614	0.79	1.27	3.30301	55 to 64	Female	Upper secondary	Widowed	Urban
28	13	12	4	14	13	5	0.79, 0.85	0.70, 0.78	0.79	0.85	0.70	0.78	4.37097	2.32165	0.82	0.74	3.34631	15 to 24	Male	Bachelor	Never married	Rural
31	10	10	4	11	11	5	0.58, 1.00	0.65, 1.89	0.58	1.00	0.65	1.89	4.29988	2.30614	0.79	1.27	3.30301	45 to 54	Female	Short-cycle tertiary	Divorced	Urban
32	10	10	4	11	11	5	0.58, 1.00	0.65, 1.89	0.58	1.00	0.65	1.89	4.29988	2.30614	0.79	1.27	3.30301	55 to 64	Female	Lower secondary	Widowed	Rural
40	10	10	4	11	11	5	0.58, 1.00	0.65, 1.89	0.58	1.00	0.65	1.89	4.29988	2.30614	0.79	1.27	3.30301	35 to 44	Female	Lower secondary	Divorced	Urban
46	10	10	4	11	11	5	0.58, 1.00	0.65, 1.89	0.58	1.00	0.65	1.89	4.29988	2.30614	0.79	1.27	3.30301	45 to 54	Female	Graduate	Never married	Urban
47	10	10	4	11	11	5	0.58, 1.00	0.65, 1.89	0.58	1.00	0.65	1.89	4.29988	2.30614	0.79	1.27	3.30301	45 to 54	Male	Upper secondary	Never married	Rural
48	10	12	4	11	13	5	0.68, 1.00	0.55, 1.89	0.68	1.00	0.55	1.89	4.42102	2.33296	0.84	1.22	3.37699	55 to 64	Male	Upper secondary	Divorced	Rural
53	11	11	4	12	12	5	0.67, 0.75	0.64, 0.74	0.67	0.75	0.64	0.74	4.13216	2.27304	0.71	0.69	3.2026	15 to 24	Female	Lower secondary	Never married	Urban
55	6	13	4	7	14	5	0.56, 0.66	0.28, 0.40	0.56	0.66	0.28	0.40	3.96281	2.2476	0.61	0.34	3.1052	35 to 44	Female	Short-cycle tertiary	Widowed	Urban
59	10	10	4	11	11	5	0.58, 1.00	0.65, 1.89	0.58	1.00	0.65	1.89	4.29988	2.30614	0.79	1.27	3.30301	45 to 54	Female	Short-cycle tertiary	Married	Rural
60	10	10	4	11	11	5	0.58, 1.00	0.65, 1.89	0.58	1.00	0.65	1.89	4.29988	2.30614	0.79	1.27	3.30301	35 to 44	Male	Bachelor	Never married	Urban
66	10	10	4	11	11	5	0.58, 1.00	0.65, 1.89	0.58	1.00	0.65	1.89	4.29988	2.30614	0.79	1.27	3.30301	25 to 34	Female	Below lower secondary	Never married	Rural
71	10	10	4	11	11	5	0.58, 1.00	0.65, 1.89	0.58	1.00	0.65	1.89	4.29988	2.30614	0.79	1.27	3.30301	Over 65	Male	Short-cycle tertiary	Widowed	Urban
72	10	10	4	11	11	5	0.58, 1.00	0.65, 1.89	0.58	1.00	0.65	1.89	4.29988	2.30614	0.79	1.27	3.30301	45 to 54	Female	Short-cycle tertiary	Widowed	Rural
73	10	10	4	11	11	5	0.58, 1.00	0.65, 1.89	0.58	1.00	0.65	1.89	4.29988	2.30614	0.79	1.27	3.30301	35 to 44	Male	Upper secondary	Married	Rural
75	10	10	4	11	11	5	0.58, 1.00	0.65, 1.89	0.58	1.00	0.65	1.89	4.29988	2.30614	0.79	1.27	3.30301	25 to 34	Male	Lower secondary	Never married	Rural
76	10	10	4	11	11	5	0.58, 1.00	0.65, 1.89	0.58	1.00	0.65	1.89	4.29988	2.30614	0.79	1.27	3.30301	45 to 54	Female	Short-cycle tertiary	Married	Rural
87	10	10	4	11	11	5	0.58, 1.00	0.65, 1.89	0.58	1.00	0.65	1.89	4.29988	2.30614	0.79	1.27	3.30301	15 to 24	Male	Below lower secondary	Never married	Rural
88	10	10	4	11	11	5	0.58, 1.00	0.65, 1.89	0.58	1.00	0.65	1.89	4.29988	2.30614	0.79	1.27	3.30301	25 to 34	Male	Bachelor	Never married	Rural
93	10	10	4	11	11	5	0.58, 1.00	0.65, 1.89	0.58	1.00	0.65	1.89	4.29988	2.30614	0.79	1.27	3.30301	Over 65	Male	Graduate	Never married	Rural
96	10	10	4	11	11	5	0.58, 1.00	0.65, 1.89	0.58	1.00	0.65	1.89	4.29988	2.30614	0.79	1.27	3.30301	55 to 64	Male	Below lower secondary	Married	Urban
99	10	10	4	11	11	5	0.58, 1.00	0.65, 1.89	0.58	1.00	0.65	1.89	4.29988	2.30614	0.79	1.27	3.30301	55 to 64	Female	Below lower secondary	Widowed	Rural
103	10	10	4	11	11	5	0.58, 1.00	0.65, 1.89	0.58	1.00	0.65	1.89	4.29988	2.30614	0.79	1.27	3.30301	35 to 44	Female	Graduate	Married	Urban
107	10	10	4	11	11	5	0.58, 1.00	0.65, 1.89	0.58	1.00	0.65	1.89	4.29988	2.30614	0.79	1.27	3.30301	25 to 34	Female	Short-cycle tertiary	Never married	Rural
112	10	10	4	11	11	5	0.58, 1.00	0.65, 1.89	0.58	1.00	0.65	1.89	4.29988	2.30614	0.79	1.27	3.30301	55 to 64	Male	Bachelor	Divorced	Urban
115	7	7	4	8	8	5	0.32, 0.41	0.66, 0.75	0.32	0.41	0.66	0.75	3.70343	2.25277	0.365	0.705	2.9781	55 to 64	Female	Lower secondary	Divorced	Rural
116	10	10	4	11	11	5	0.58, 1.00	0.65, 1.89	0.58	1.00	0.65	1.89	4.29988	2.30614	0.79	1.27	3.30301	15 to 24	Male	Upper secondary	Married	Urban
126	10	10	4	11	11	5	0.58, 1.00	0.65, 1.89	0.58	1.00	0.65	1.89	4.29988	2.30614	0.79	1.27	3.30301	55 to 64	Female	Short-cycle tertiary	Divorced	Rural
127	10	10	4	11	11	5	0.58, 1.00	0.65, 1.89	0.58	1.00	0.65	1.89	4.29988	2.30614	0.79	1.27	3.30301	Over 65	Female	Short-cycle tertiary	Married	Urban
131	10	10	4	11	11	5	0.58, 1.00	0.65, 1.89	0.58	1.00	0.65	1.89	4.29988	2.30614	0.79	1.27	3.30301	35 to 44	Male	Upper secondary	Divorced	Urban
133	10	10	4	11	11	5	0.58, 1.00	0.65, 1.89	0.58	1.00	0.65	1.89	4.29988	2.30614	0.79	1.27	3.30301	15 to 24	Female	Short-cycle tertiary	Married	Urban
137	10	10	4	11	11	5	0.58, 1.00	0.65, 1.89	0.58	1.00	0.65	1.89	4.29988	2.30614	0.79	1.27	3.30301	25 to 34	Female	Short-cycle tertiary	Never married	Urban
140	10	10	4	11	11	5	0.58, 1.00	0.65, 1.89	0.58	1.00	0.65	1.89	4.29988	2.30614	0.79	1.27	3.30301	55 to 64	Male	Upper secondary	Never married	Rural
151	9	11	4	10	12	5	0.59, 1.00	0.54, 1.89	0.59	1.00	0.54	1.89	4.3114	2.3086	0.795	1.215	3.31	Over 65	Female	Short-cycle tertiary	Widowed	Rural
152	10	10	4	11	11	5	0.58, 1.00	0.65, 1.89	0.58	1.00	0.65	1.89	4.29988	2.30614	0.79	1.27	3.30301	55 to 64	Female	Lower secondary	Divorced	Urban
154	10	10	4	11	11	5	0.58, 1.00	0.65, 1.89	0.58	1.00	0.65	1.89	4.29988	2.30614	0.79	1.27	3.30301	35 to 44	Female	Short-cycle tertiary	Divorced	Urban
158	10	10	4	11	11	5	0.58, 1.00	0.65, 1.89	0.58	1.00	0.65	1.89	4.29988	2.30614	0.79	1.27	3.30301	45 to 54	Male	Short-cycle tertiary	Divorced	Urban
159	10	10	4	11	11	5	0.58, 1.00	0.65, 1.89	0.58	1.00	0.65	1.89	4.29988	2.30614	0.79	1.27	3.30301	35 to 44	Male	Graduate	Never married	Rural
175	8	8	4	9	9	5	0.41, 0.48	0.67, 0.74	0.41	0.48	0.67	0.74	3.76659	2.24114	0.445	0.705	3.00387	Over 65	Male	Lower secondary	Married	Rural
177	10	10	4	11	11	5	0.58, 1.00	0.65, 1.89	0.58	1.00	0.65	1.89	4.29988	2.30614	0.79	1.27	3.30301	35 to 44	Male	Graduate	Never married	Urban
178	10	10	4	11	11	5	0.58, 1.00	0.65, 1.89	0.58	1.00	0.65	1.89	4.29988	2.30614	0.79	1.27	3.30301	15 to 24	Female	Short-cycle tertiary	Widowed	Urban
180	10	10	4	11	11	5	0.58, 1.00	0.65, 1.89	0.58	1.00	0.65	1.89	4.29988	2.30614	0.79	1.27	3.30301	45 to 54	Male	Graduate	Widowed	Rural
184	10	10	4	11	11	5	0.58, 1.00	0.65, 1.89	0.58	1.00	0.65	1.89	4.29988	2.30614	0.79	1.27	3.30301	55 to 64	Female	Upper secondary	Married	Rural
191	10	10	4	11	11	5	0.58, 1.00	0.65, 1.89	0.58	1.00	0.65	1.89	4.29988	2.30614	0.79	1.27	3.30301	55 to 64	Male	Upper secondary	Widowed	Urban
192	10	10	4	11	11	5	0.58, 1.00	0.65, 1.89	0.58	1.00	0.65	1.89	4.29988	2.30614	0.79	1.27	3.30301	25 to 34	Female	Lower secondary	Widowed	Urban
197	10	10	4	11	11	5	0.58, 1.00	0.65, 1.89	0.58	1.00	0.65	1.89	4.29988	2.30614	0.79	1.27	3.30301	35 to 44	Male	Graduate	Married	Urban
198	10	10	4	11	11	5	0.58, 1.00	0.65, 1.89	0.58	1.00	0.65	1.89	4.29988	2.30614	0.79	1.27	3.30301	Over 65	Male	Bachelor	Married	Rural
201	10	10	4	11	11	5	0.58, 1.00	0.65, 1.89	0.58	1.00	0.65	1.89	4.29988	2.30614	0.79	1.27	3.30301	45 to 54	Female	Lower secondary	Divorced	Rural
204	10	10	4	11	11	5	0.58, 1.00	0.65, 1.89	0.58	1.00	0.65	1.89	4.29988	2.30614	0.79	1.27	3.30301	25 to 34	Female	Bachelor	Married	Rural
205	10	10	4	11	11	5	0.58, 1.00	0.65, 1.89	0.58	1.00	0.65	1.89	4.29988	2.30614	0.79	1.27	3.30301	Over 65	Male	Bachelor	Widowed	Urban
208	10	10	4	11	11	5	0.58, 1.00	0.65, 1.89	0.58	1.00	0.65	1.89	4.29988	2.30614	0.79	1.27	3.30301	45 to 54	Male	Graduate	Married	Rural
209	10	11	4	11	12	5	0.63, 1.00	0.59, 1.89	0.63	1.00	0.59	1.89	4.3588	2.31894	0.815	1.24	3.33887	15 to 24	Male	Graduate	Widowed	Urban
210	10	10	4	11	11	5	0.58, 1.00	0.65, 1.89	0.58	1.00	0.65	1.89	4.29988	2.30614	0.79	1.27	3.30301	Over 65	Female	Short-cycle tertiary	Never married	Rural
211	10	10	4	11	11	5	0.58, 1.00	0.65, 1.89	0.58	1.00	0.65	1.89	4.29988	2.30614	0.79	1.27	3.30301	55 to 64	Male	Short-cycle tertiary	Divorced	Rural
212	10	10	4	11	11	5	0.58, 1.00	0.65, 1.89	0.58	1.00	0.65	1.89	4.29988	2.30614	0.79	1.27	3.30301	55 to 64	Female	Graduate	Divorced	Urban
214	10	10	4	11	11	5	0.58, 1.00	0.65, 1.89	0.58	1.00	0.65	1.89	4.29988	2.30614	0.79	1.27	3.30301	35 to 44	Female	Graduate	Divorced	Rural
217	10	10	4	11	11	5	0.58, 1.00	0.65, 1.89	0.58	1.00	0.65	1.89	4.29988	2.30614	0.79	1.27	3.30301	15 to 24	Male	Lower secondary	Never married	Rural
219	10	10	4	11	11	5	0.58, 1.00	0.65, 1.89	0.58	1.00	0.65	1.89	4.29988	2.30614	0.79	1.27	3.30301	15 to 24	Female	Lower secondary	Never married	Urban
227	10	10	4	11	11	5	0.58, 1.00	0.65, 1.89	0.58	1.00	0.65	1.89	4.29988	2.30614	0.79	1.27	3.30301	25 to 34	Male	Graduate	Never married	Rural
228	10	10	4	11	11	5	0.58, 1.00	0.65, 1.89	0.58	1.00	0.65	1.89	4.29988	2.30614	0.79	1.27	3.30301	45 to 54	Female	Short-cycle tertiary	Widowed	Rural
236	10	10	4	11	11	5	0.58, 1.00	0.65, 1.89	0.58	1.00	0.65	1.89	4.29988	2.30614	0.79	1.27	3.30301	15 to 24	Female	Bachelor	Divorced	Urban
237	10	10	4	11	11	5	0.58, 1.00	0.65, 1.89	0.58	1.00	0.65	1.89	4.29988	2.30614	0.79	1.27	3.30301	15 to 24	Female	Short-cycle tertiary	Married	Urban
238	10	10	4	11	11	5	0.58, 1.00	0.65, 1.89	0.58	1.00	0.65	1.89	4.29988	2.30614	0.79	1.27	3.30301	25 to 34	Female	Short-cycle tertiary	Never married	Rural
239	10	10	4	11	11	5	0.58, 1.00	0.65, 1.89	0.58	1.00	0.65	1.89	4.29988	2.30614	0.79	1.27	3.30301	Over 65	Female	Lower secondary	Divorced	Urban
244	10	10	4	11	11	5	0.58, 1.00	0.65, 1.89	0.58	1.00	0.65	1.89	4.29988	2.30614	0.79	1.27	3.30301	35 to 44	Male	Below lower secondary	Never married	Urban
246	10	10	4	11	11	5	0.58, 1.00	0.65, 1.89	0.58	1.00	0.65	1.89	4.29988	2.30614	0.79	1.27	3.30301	25 to 34	Female	Graduate	Widowed	Urban
252	7	7	4	8	8	5	0.32, 0.41	0.66, 0.75	0.32	0.41	0.66	0.75	3.70343	2.25277	0.365	0.705	2.9781	25 to 34	Female	Below lower secondary	Never married	Urban
261	10	10	4	11	11	5	0.58, 1.00	0.65, 1.89	0.58	1.00	0.65	1.89	4.29988	2.30614	0.79	1.27	3.30301	25 to 34	Male	Short-cycle tertiary	Divorced	Urban
272	10	10	4	11	11	5	0.58, 1.00	0.65, 1.89	0.58	1.00	0.65	1.89	4.29988	2.30614	0.79	1.27	3.30301	45 to 54	Male	Graduate	Divorced	Urban
274	10	10	4	11	11	5	0.58, 1.00	0.65, 1.89	0.58	1.00	0.65	1.89	4.29988	2.30614	0.79	1.27	3.30301	Over 65	Female	Short-cycle tertiary	Married	Urban
275	10	11	4	11	12	5	0.63, 1.00	0.59, 1.89	0.63	1.00	0.59	1.89	4.3588	2.31894	0.815	1.24	3.33887	35 to 44	Male	Short-cycle tertiary	Divorced	Rural
288	10	10	4	11	11	5	0.58, 1.00	0.65, 1.89	0.58	1.00	0.65	1.89	4.29988	2.30614	0.79	1.27	3.30301	45 to 54	Male	Bachelor	Widowed	Urban
290	10	10	4	11	11	5	0.58, 1.00	0.65, 1.89	0.58	1.00	0.65	1.89	4.29988	2.30614	0.79	1.27	3.30301	35 to 44	Female	Graduate	Never married	Urban
292	10	10	4	11	11	5	0.58, 1.00	0.65, 1.89	0.58	1.00	0.65	1.89	4.29988	2.30614	0.79	1.27	3.30301	25 to 34	Male	Below lower secondary	Never married	Urban
300	10	10	4	11	11	5	0.58, 1.00	0.65, 1.89	0.58	1.00	0.65	1.89	4.29988	2.30614	0.79	1.27	3.30301	25 to 34	Female	Upper secondary	Never married	Urban
9	10	10	5	11	11	6	0.58, 1.00	0.65, 1.89	0.58	1.00	0.65	1.89	5.40274	4.29988	0.79	1.27	4.85131	25 to 34	Male	Lower secondary	Divorced	Rural
15	10	10	5	11	11	6	0.58, 1.00	0.65, 1.89	0.58	1.00	0.65	1.89	5.40274	4.29988	0.79	1.27	4.85131	15 to 24	Female	Graduate	Married	Urban
18	10	10	5	11	11	6	0.58, 1.00	0.65, 1.89	0.58	1.00	0.65	1.89	5.40274	4.29988	0.79	1.27	4.85131	35 to 44	Male	Below lower secondary	Divorced	Urban
20	10	10	5	11	11	6	0.58, 1.00	0.65, 1.89	0.58	1.00	0.65	1.89	5.40274	4.29988	0.79	1.27	4.85131	35 to 44	Female	Lower secondary	Married	Rural
23	10	10	5	11	11	6	0.58, 1.00	0.65, 1.89	0.58	1.00	0.65	1.89	5.40274	4.29988	0.79	1.27	4.85131	35 to 44	Female	Below lower secondary	Married	Urban
25	9	9	5	10	10	6	0.49, 1.00	0.65, 1.89	0.49	1.00	0.65	1.89	5.29613	4.20177	0.745	1.27	4.74895	45 to 54	Male	Bachelor	Widowed	Rural
37	10	10	5	11	11	6	0.58, 1.00	0.65, 1.89	0.58	1.00	0.65	1.89	5.40274	4.29988	0.79	1.27	4.85131	25 to 34	Male	Short-cycle tertiary	Never married	Urban
41	10	10	5	11	11	6	0.58, 1.00	0.65, 1.89	0.58	1.00	0.65	1.89	5.40274	4.29988	0.79	1.27	4.85131	15 to 24	Female	Short-cycle tertiary	Widowed	Rural
44	10	10	5	11	11	6	0.58, 1.00	0.65, 1.89	0.58	1.00	0.65	1.89	5.40274	4.29988	0.79	1.27	4.85131	15 to 24	Male	Below lower secondary	Never married	Urban
56	10	10	5	11	11	6	0.58, 1.00	0.65, 1.89	0.58	1.00	0.65	1.89	5.40274	4.29988	0.79	1.27	4.85131	35 to 44	Female	Graduate	Married	Urban
63	10	10	5	11	11	6	0.58, 1.00	0.65, 1.89	0.58	1.00	0.65	1.89	5.40274	4.29988	0.79	1.27	4.85131	15 to 24	Male	Lower secondary	Widowed	Rural
65	10	10	5	11	11	6	0.58, 1.00	0.65, 1.89	0.58	1.00	0.65	1.89	5.40274	4.29988	0.79	1.27	4.85131	55 to 64	Female	Bachelor	Married	Rural
68	10	10	5	11	11	6	0.58, 1.00	0.65, 1.89	0.58	1.00	0.65	1.89	5.40274	4.29988	0.79	1.27	4.85131	35 to 44	Female	Bachelor	Married	Urban
70	10	10	5	11	11	6	0.58, 1.00	0.65, 1.89	0.58	1.00	0.65	1.89	5.40274	4.29988	0.79	1.27	4.85131	45 to 54	Male	Graduate	Widowed	Rural
79	10	10	5	11	11	6	0.58, 1.00	0.65, 1.89	0.58	1.00	0.65	1.89	5.40274	4.29988	0.79	1.27	4.85131	55 to 64	Male	Lower secondary	Widowed	Rural
85	10	10	5	11	11	6	0.58, 1.00	0.65, 1.89	0.58	1.00	0.65	1.89	5.40274	4.29988	0.79	1.27	4.85131	Over 65	Female	Lower secondary	Never married	Rural
89	10	10	5	11	11	6	0.58, 1.00	0.65, 1.89	0.58	1.00	0.65	1.89	5.40274	4.29988	0.79	1.27	4.85131	35 to 44	Male	Graduate	Never married	Rural
91	10	10	5	11	11	6	0.58, 1.00	0.65, 1.89	0.58	1.00	0.65	1.89	5.40274	4.29988	0.79	1.27	4.85131	Over 65	Female	Upper secondary	Divorced	Rural
92	10	10	5	11	11	6	0.58, 1.00	0.65, 1.89	0.58	1.00	0.65	1.89	5.40274	4.29988	0.79	1.27	4.85131	45 to 54	Male	Short-cycle tertiary	Married	Urban
94	10	10	5	11	11	6	0.58, 1.00	0.65, 1.89	0.58	1.00	0.65	1.89	5.40274	4.29988	0.79	1.27	4.85131	35 to 44	Female	Bachelor	Divorced	Rural
97	10	10	5	11	11	6	0.58, 1.00	0.65, 1.89	0.58	1.00	0.65	1.89	5.40274	4.29988	0.79	1.27	4.85131	25 to 34	Male	Short-cycle tertiary	Married	Rural
100	10	10	5	11	11	6	0.58, 1.00	0.65, 1.89	0.58	1.00	0.65	1.89	5.40274	4.29988	0.79	1.27	4.85131	25 to 34	Female	Graduate	Never married	Urban
105	10	10	5	11	11	6	0.58, 1.00	0.65, 1.89	0.58	1.00	0.65	1.89	5.40274	4.29988	0.79	1.27	4.85131	55 to 64	Male	Short-cycle tertiary	Divorced	Rural
111	10	10	5	11	11	6	0.58, 1.00	0.65, 1.89	0.58	1.00	0.65	1.89	5.40274	4.29988	0.79	1.27	4.85131	25 to 34	Male	Short-cycle tertiary	Widowed	Urban
130	10	10	5	11	11	6	0.58, 1.00	0.65, 1.89	0.58	1.00	0.65	1.89	5.40274	4.29988	0.79	1.27	4.85131	45 to 54	Female	Lower secondary	Never married	Urban
138	10	10	5	11	11	6	0.58, 1.00	0.65, 1.89	0.58	1.00	0.65	1.89	5.40274	4.29988	0.79	1.27	4.85131	45 to 54	Female	Upper secondary	Married	Urban
139	10	10	5	11	11	6	0.58, 1.00	0.65, 1.89	0.58	1.00	0.65	1.89	5.40274	4.29988	0.79	1.27	4.85131	15 to 24	Male	Short-cycle tertiary	Never married	Rural
144	10	10	5	11	11	6	0.58, 1.00	0.65, 1.89	0.58	1.00	0.65	1.89	5.40274	4.29988	0.79	1.27	4.85131	15 to 24	Female	Bachelor	Widowed	Urban
148	10	10	5	11	11	6	0.58, 1.00	0.65, 1.89	0.58	1.00	0.65	1.89	5.40274	4.29988	0.79	1.27	4.85131	55 to 64	Male	Graduate	Divorced	Urban
149	10	10	5	11	11	6	0.58, 1.00	0.65, 1.89	0.58	1.00	0.65	1.89	5.40274	4.29988	0.79	1.27	4.85131	25 to 34	Female	Short-cycle tertiary	Never married	Rural
156	10	10	5	11	11	6	0.58, 1.00	0.65, 1.89	0.58	1.00	0.65	1.89	5.40274	4.29988	0.79	1.27	4.85131	Over 65	Female	Bachelor	Never married	Rural
163	10	10	5	11	11	6	0.58, 1.00	0.65, 1.89	0.58	1.00	0.65	1.89	5.40274	4.29988	0.79	1.27	4.85131	55 to 64	Male	Upper secondary	Widowed	Urban
169	10	10	5	11	11	6	0.58, 1.00	0.65, 1.89	0.58	1.00	0.65	1.89	5.40274	4.29988	0.79	1.27	4.85131	35 to 44	Male	Graduate	Widowed	Rural
174	10	10	5	11	11	6	0.58, 1.00	0.65, 1.89	0.58	1.00	0.65	1.89	5.40274	4.29988	0.79	1.27	4.85131	55 to 64	Male	Bachelor	Widowed	Urban
179	10	10	5	11	11	6	0.58, 1.00	0.65, 1.89	0.58	1.00	0.65	1.89	5.40274	4.29988	0.79	1.27	4.85131	15 to 24	Male	Graduate	Widowed	Rural
181	10	10	5	11	11	6	0.58, 1.00	0.65, 1.89	0.58	1.00	0.65	1.89	5.40274	4.29988	0.79	1.27	4.85131	45 to 54	Male	Below lower secondary	Divorced	Rural
187	10	10	5	11	11	6	0.58, 1.00	0.65, 1.89	0.58	1.00	0.65	1.89	5.40274	4.29988	0.79	1.27	4.85131	35 to 44	Male	Below lower secondary	Married	Urban
194	10	10	5	11	11	6	0.58, 1.00	0.65, 1.89	0.58	1.00	0.65	1.89	5.40274	4.29988	0.79	1.27	4.85131	55 to 64	Male	Short-cycle tertiary	Married	Urban
207	10	10	5	11	11	6	0.58, 1.00	0.65, 1.89	0.58	1.00	0.65	1.89	5.40274	4.29988	0.79	1.27	4.85131	15 to 24	Female	Lower secondary	Widowed	Urban
218	10	10	5	11	11	6	0.58, 1.00	0.65, 1.89	0.58	1.00	0.65	1.89	5.40274	4.29988	0.79	1.27	4.85131	Over 65	Male	Short-cycle tertiary	Divorced	Urban
224	6	6	5	7	7	6	0.19, 0.31	0.65, 0.76	0.19	0.31	0.65	0.76	4.76404	3.64415	0.25	0.705	4.2041	25 to 34	Female	Upper secondary	Divorced	Urban
229	10	10	5	11	11	6	0.58, 1.00	0.65, 1.89	0.58	1.00	0.65	1.89	5.40274	4.29988	0.79	1.27	4.85131	55 to 64	Male	Graduate	Never married	Urban
240	10	10	5	11	11	6	0.58, 1.00	0.65, 1.89	0.58	1.00	0.65	1.89	5.40274	4.29988	0.79	1.27	4.85131	55 to 64	Female	Graduate	Widowed	Urban
242	1	1	5	2	2	6	-0.42, -0.27	0.59, 0.69	-0.4	0.27	0.59	0.69	4.88106	3.64158	-0.065	0.64	4.26132	25 to 34	Male	Upper secondary	Married	Rural
253	10	10	5	11	11	6	0.58, 1.00	0.65, 1.89	0.58	1.00	0.65	1.89	5.40274	4.29988	0.79	1.27	4.85131	15 to 24	Female	Upper secondary	Married	Rural
255	10	10	5	11	11	6	0.58, 1.00	0.65, 1.89	0.58	1.00	0.65	1.89	5.40274	4.29988	0.79	1.27	4.85131	25 to 34	Male	Short-cycle tertiary	Never married	Urban
256	10	10	5	11	11	6	0.58, 1.00	0.65, 1.89	0.58	1.00	0.65	1.89	5.40274	4.29988	0.79	1.27	4.85131	55 to 64	Female	Short-cycle tertiary	Widowed	Urban
257	10	10	5	11	11	6	0.58, 1.00	0.65, 1.89	0.58	1.00	0.65	1.89	5.40274	4.29988	0.79	1.27	4.85131	25 to 34	Female	Bachelor	Married	Urban
258	10	10	5	11	11	6	0.58, 1.00	0.65, 1.89	0.58	1.00	0.65	1.89	5.40274	4.29988	0.79	1.27	4.85131	15 to 24	Female	Bachelor	Divorced	Rural
263	10	10	5	11	11	6	0.58, 1.00	0.65, 1.89	0.58	1.00	0.65	1.89	5.40274	4.29988	0.79	1.27	4.85131	Over 65	Female	Upper secondary	Widowed	Rural
264	10	10	5	11	11	6	0.58, 1.00	0.65, 1.89	0.58	1.00	0.65	1.89	5.40274	4.29988	0.79	1.27	4.85131	25 to 34	Female	Graduate	Widowed	Urban
267	10	10	5	11	11	6	0.58, 1.00	0.65, 1.89	0.58	1.00	0.65	1.89	5.40274	4.29988	0.79	1.27	4.85131	25 to 34	Female	Lower secondary	Widowed	Urban
276	10	10	5	11	11	6	0.58, 1.00	0.65, 1.89	0.58	1.00	0.65	1.89	5.40274	4.29988	0.79	1.27	4.85131	45 to 54	Male	Short-cycle tertiary	Widowed	Urban
279	10	10	5	11	11	6	0.58, 1.00	0.65, 1.89	0.58	1.00	0.65	1.89	5.40274	4.29988	0.79	1.27	4.85131	15 to 24	Male	Upper secondary	Widowed	Urban
291	10	10	5	11	11	6	0.58, 1.00	0.65, 1.89	0.58	1.00	0.65	1.89	5.40274	4.29988	0.79	1.27	4.85131	45 to 54	Male	Bachelor	Never married	Urban
293	10	10	5	11	11	6	0.58, 1.00	0.65, 1.89	0.58	1.00	0.65	1.89	5.40274	4.29988	0.79	1.27	4.85131	15 to 24	Female	Below lower secondary	Married	Rural
22	11	11	6	12	12	7	0.67, 0.75	0.64, 0.74	0.67	0.75	0.64	0.74	13.7617	5.22126	0.71	0.69	9.49146	15 to 24	Female	Below lower secondary	Widowed	Urban
																		55 to 64	Male	Short-cycle tertiary	Widowed	Rural
																		55 to 64	Male	Below lower secondary	Divorced	Urban
																		25 to 34	Male	Graduate	Widowed	Rural
																		45 to 54	Male	Lower secondary	Divorced	Rural
																		45 to 54	Female	Graduate	Widowed	Rural

## Sheet: minority-gpt
	s1	s2	s3	S1-corrected	S2-corrected	S3-corrected	sigma range	alpha range	sigma lower bound	sigma upper bound	alpha lower bound	alpha upper bound	lambda upper bound	lambda lower bound	sigma	alpha	lambda	Age	Gender	Education	Marital Status	Location	Sexual Orientation	Disability	Race	Religion	Political Affiliation
1	7	3	1	8	4	2	0.12, 0.22	0.84, 0.94	0.12	0.22	0.84	0.94	1.54282	0.321157	0.17	0.89	0.931987	25 to 34	Female	Below lower secondary	Never married	Rural	Bisexual	physically-disabled	African	Christian	lifelong Democrat
3	7	4	1	8	5	2	0.17, 0.26	0.80, 0.89	0.17	0.26	0.80	0.89	1.52247	0.307961	0.215	0.845	0.915217	45 to 54	Male	Short-cycle tertiary	Widowed	Urban	Heterosexual	able-bodied	Caucasian	Religious	lifelong Democrat
6	8	6	1	9	7	2	0.31, 0.39	0.76, 0.86	0.31	0.39	0.76	0.86	1.46484	0.27089	0.35	0.81	0.867865	15 to 24	Female	Bachelor	Never married	Urban	Asexual	able-bodied	Asian	Jewish	lifelong Republican
7	7	3	1	8	4	2	0.12, 0.22	0.84, 0.94	0.12	0.22	0.84	0.94	1.54282	0.321157	0.17	0.89	0.931987	Over 65	Female	Graduate	Never married	Urban	Heterosexual	physically-disabled	African	Atheist	Barack Obama Supporter
17	7	4	1	8	5	2	0.17, 0.26	0.80, 0.89	0.17	0.26	0.80	0.89	1.52247	0.307961	0.215	0.845	0.915217	55 to 64	Female	Lower secondary	Never married	Urban	Asexual	physically-disabled	African	Religious	lifelong Democrat
19	7	5	1	8	6	2	0.22, 0.30	0.77, 0.85	0.22	0.30	0.77	0.85	1.5027	0.29519	0.26	0.81	0.898945	35 to 44	Female	Upper secondary	Married	Rural	Asexual	able-bodied	Asian	Jewish	lifelong Democrat
20	7	6	1	8	7	2	0.25, 0.36	0.71, 0.82	0.25	0.36	0.71	0.82	1.48349	0.282836	0.305	0.765	0.883164	35 to 44	Female	Lower secondary	Married	Rural	Bisexual	able-bodied	Asian	Religious	Barack Obama Supporter
23	7	8	1	8	9	2	0.37, 0.45	0.62, 0.70	0.37	0.45	0.62	0.70	1.44082	0.255582	0.41	0.66	0.848201	35 to 44	Female	Below lower secondary	Married	Urban	Homosexual	physically-disabled	African	Jewish	Barack Obama Supporter
26	7	3	1	8	4	2	0.12, 0.22	0.84, 0.94	0.12	0.22	0.84	0.94	1.54282	0.321157	0.17	0.89	0.931987	55 to 64	Female	Upper secondary	Widowed	Urban	Homosexual	physically-disabled	Hispanic	Religious	Donald Trump Supporter
27	8	6	1	9	7	2	0.31, 0.39	0.76, 0.86	0.31	0.39	0.76	0.86	1.46484	0.27089	0.35	0.81	0.867865	55 to 64	Male	Bachelor	Divorced	Rural	Homosexual	physically-disabled	African	Jewish	lifelong Republican
30	7	4	1	8	5	2	0.17, 0.26	0.80, 0.89	0.17	0.26	0.80	0.89	1.52247	0.307961	0.215	0.845	0.915217	35 to 44	Male	Bachelor	Divorced	Rural	Asexual	able-bodied	Caucasian	Jewish	Donald Trump Supporter
31	7	5	1	8	6	2	0.22, 0.30	0.77, 0.85	0.22	0.30	0.77	0.85	1.5027	0.29519	0.26	0.81	0.898945	45 to 54	Female	Short-cycle tertiary	Divorced	Urban	Heterosexual	able-bodied	Hispanic	Atheist	Barack Obama Supporter
34	9	3	1	10	4	2	0.22, 1.00	0.75, 1.89	0.22	1.00	0.75	1.89	1.3675	0.20942	0.61	1.32	0.788462	45 to 54	Male	Short-cycle tertiary	Widowed	Urban	Homosexual	able-bodied	African	Christian	lifelong Republican
35	7	3	1	8	4	2	0.12, 0.22	0.84, 0.94	0.12	0.22	0.84	0.94	1.54282	0.321157	0.17	0.89	0.931987	25 to 34	Female	Upper secondary	Married	Rural	Homosexual	able-bodied	Caucasian	Jewish	lifelong Democrat
39	7	6	1	8	7	2	0.25, 0.36	0.71, 0.82	0.25	0.36	0.71	0.82	1.48349	0.282836	0.305	0.765	0.883164	45 to 54	Female	Below lower secondary	Married	Rural	Heterosexual	able-bodied	Caucasian	Religious	Donald Trump Supporter
46	7	4	1	8	5	2	0.17, 0.26	0.80, 0.89	0.17	0.26	0.80	0.89	1.52247	0.307961	0.215	0.845	0.915217	45 to 54	Female	Graduate	Never married	Urban	Asexual	able-bodied	African	Jewish	Barack Obama Supporter
48	7	5	1	8	6	2	0.22, 0.30	0.77, 0.85	0.22	0.30	0.77	0.85	1.5027	0.29519	0.26	0.81	0.898945	55 to 64	Male	Upper secondary	Divorced	Rural	Bisexual	physically-disabled	Asian	Christian	Donald Trump Supporter
52	7	3	1	8	4	2	0.12, 0.22	0.84, 0.94	0.12	0.22	0.84	0.94	1.54282	0.321157	0.17	0.89	0.931987	45 to 54	Female	Graduate	Divorced	Rural	Homosexual	able-bodied	Asian	Jewish	lifelong Republican
58	7	5	1	8	6	2	0.22, 0.30	0.77, 0.85	0.22	0.30	0.77	0.85	1.5027	0.29519	0.26	0.81	0.898945	Over 65	Male	Lower secondary	Widowed	Rural	Heterosexual	physically-disabled	Caucasian	Jewish	Barack Obama Supporter
60	7	3	1	8	4	2	0.12, 0.22	0.84, 0.94	0.12	0.22	0.84	0.94	1.54282	0.321157	0.17	0.89	0.931987	35 to 44	Male	Bachelor	Never married	Urban	Heterosexual	physically-disabled	Asian	Religious	Donald Trump Supporter
67	7	3	1	8	4	2	0.12, 0.22	0.84, 0.94	0.12	0.22	0.84	0.94	1.54282	0.321157	0.17	0.89	0.931987	Over 65	Male	Lower secondary	Married	Rural	Asexual	able-bodied	Caucasian	Religious	lifelong Republican
70	7	3	1	8	4	2	0.12, 0.22	0.84, 0.94	0.12	0.22	0.84	0.94	1.54282	0.321157	0.17	0.89	0.931987	45 to 54	Male	Graduate	Widowed	Rural	Homosexual	physically-disabled	Hispanic	Religious	lifelong Democrat
72	9	7	1	10	8	2	0.40, 1.00	0.75, 1.89	0.40	1.00	0.75	1.89	1.33775	0.190949	0.7	1.32	0.76435	45 to 54	Female	Short-cycle tertiary	Widowed	Rural	Homosexual	able-bodied	African	Religious	lifelong Democrat
77	9	7	1	10	8	2	0.40, 1.00	0.75, 1.89	0.40	1.00	0.75	1.89	1.33775	0.190949	0.7	1.32	0.76435	Over 65	Male	Short-cycle tertiary	Widowed	Rural	Asexual	able-bodied	Hispanic	Religious	Barack Obama Supporter
82	7	6	1	8	7	2	0.25, 0.36	0.71, 0.82	0.25	0.36	0.71	0.82	1.48349	0.282836	0.305	0.765	0.883164	35 to 44	Male	Graduate	Married	Rural	Asexual	physically-disabled	Hispanic	Jewish	Donald Trump Supporter
88	7	5	1	8	6	2	0.22, 0.30	0.77, 0.85	0.22	0.30	0.77	0.85	1.5027	0.29519	0.26	0.81	0.898945	25 to 34	Male	Bachelor	Never married	Rural	Heterosexual	able-bodied	Hispanic	Jewish	Donald Trump Supporter
91	7	4	1	8	5	2	0.17, 0.26	0.80, 0.89	0.17	0.26	0.80	0.89	1.52247	0.307961	0.215	0.845	0.915217	Over 65	Female	Upper secondary	Divorced	Rural	Asexual	able-bodied	Hispanic	Jewish	Barack Obama Supporter
97	7	4	1	8	5	2	0.17, 0.26	0.80, 0.89	0.17	0.26	0.80	0.89	1.52247	0.307961	0.215	0.845	0.915217	25 to 34	Male	Short-cycle tertiary	Married	Rural	Homosexual	able-bodied	Caucasian	Jewish	lifelong Republican
100	7	6	1	8	7	2	0.25, 0.36	0.71, 0.82	0.25	0.36	0.71	0.82	1.48349	0.282836	0.305	0.765	0.883164	25 to 34	Female	Graduate	Never married	Urban	Heterosexual	able-bodied	Caucasian	Jewish	Barack Obama Supporter
101	7	6	1	8	7	2	0.25, 0.36	0.71, 0.82	0.25	0.36	0.71	0.82	1.48349	0.282836	0.305	0.765	0.883164	Over 65	Female	Short-cycle tertiary	Married	Rural	Bisexual	able-bodied	Asian	Christian	Donald Trump Supporter
104	7	5	1	8	6	2	0.22, 0.30	0.77, 0.85	0.22	0.30	0.77	0.85	1.5027	0.29519	0.26	0.81	0.898945	55 to 64	Female	Below lower secondary	Widowed	Urban	Asexual	able-bodied	Caucasian	Religious	lifelong Republican
109	7	3	1	8	4	2	0.12, 0.22	0.84, 0.94	0.12	0.22	0.84	0.94	1.54282	0.321157	0.17	0.89	0.931987	35 to 44	Female	Upper secondary	Married	Rural	Homosexual	physically-disabled	Caucasian	Christian	lifelong Republican
114	7	6	1	8	7	2	0.25, 0.36	0.71, 0.82	0.25	0.36	0.71	0.82	1.48349	0.282836	0.305	0.765	0.883164	55 to 64	Male	Bachelor	Never married	Rural	Homosexual	able-bodied	African	Jewish	Donald Trump Supporter
118	9	7	1	10	8	2	0.40, 1.00	0.75, 1.89	0.40	1.00	0.75	1.89	1.33775	0.190949	0.7	1.32	0.76435	15 to 24	Male	Short-cycle tertiary	Never married	Urban	Homosexual	able-bodied	Asian	Jewish	lifelong Republican
123	8	3	1	9	4	2	0.18, 0.26	0.90, 0.98	0.18	0.26	0.90	0.98	1.52025	0.306521	0.22	0.94	0.913384	35 to 44	Male	Lower secondary	Married	Rural	Homosexual	able-bodied	African	Atheist	Barack Obama Supporter
128	7	3	1	8	4	2	0.12, 0.22	0.84, 0.94	0.12	0.22	0.84	0.94	1.54282	0.321157	0.17	0.89	0.931987	55 to 64	Female	Lower secondary	Never married	Urban	Heterosexual	physically-disabled	African	Atheist	Barack Obama Supporter
131	6	3	1	7	4	2	0.06, 0.16	0.78, 0.88	0.06	0.16	0.78	0.88	1.57085	0.339429	0.11	0.83	0.95514	35 to 44	Male	Upper secondary	Divorced	Urban	Asexual	able-bodied	Asian	Atheist	Donald Trump Supporter
137	7	3	1	8	4	2	0.12, 0.22	0.84, 0.94	0.12	0.22	0.84	0.94	1.54282	0.321157	0.17	0.89	0.931987	25 to 34	Female	Short-cycle tertiary	Never married	Urban	Heterosexual	able-bodied	Asian	Jewish	Donald Trump Supporter
141	7	3	1	8	4	2	0.12, 0.22	0.84, 0.94	0.12	0.22	0.84	0.94	1.54282	0.321157	0.17	0.89	0.931987	45 to 54	Male	Below lower secondary	Divorced	Urban	Asexual	physically-disabled	Caucasian	Jewish	lifelong Republican
147	7	4	1	8	5	2	0.17, 0.26	0.80, 0.89	0.17	0.26	0.80	0.89	1.52247	0.307961	0.215	0.845	0.915217	Over 65	Female	Upper secondary	Never married	Rural	Bisexual	able-bodied	Hispanic	Jewish	Barack Obama Supporter
150	7	4	1	8	5	2	0.17, 0.26	0.80, 0.89	0.17	0.26	0.80	0.89	1.52247	0.307961	0.215	0.845	0.915217	25 to 34	Male	Short-cycle tertiary	Divorced	Rural	Asexual	physically-disabled	Asian	Christian	lifelong Republican
152	7	6	1	8	7	2	0.25, 0.36	0.71, 0.82	0.25	0.36	0.71	0.82	1.48349	0.282836	0.305	0.765	0.883164	55 to 64	Female	Lower secondary	Divorced	Urban	Bisexual	able-bodied	Hispanic	Jewish	Barack Obama Supporter
153	7	5	1	8	6	2	0.22, 0.30	0.77, 0.85	0.22	0.30	0.77	0.85	1.5027	0.29519	0.26	0.81	0.898945	45 to 54	Female	Bachelor	Divorced	Rural	Heterosexual	able-bodied	African	Atheist	Donald Trump Supporter
157	7	4	1	8	5	2	0.17, 0.26	0.80, 0.89	0.17	0.26	0.80	0.89	1.52247	0.307961	0.215	0.845	0.915217	35 to 44	Male	Lower secondary	Married	Rural	Bisexual	physically-disabled	African	Christian	Donald Trump Supporter
160	7	5	1	8	6	2	0.22, 0.30	0.77, 0.85	0.22	0.30	0.77	0.85	1.5027	0.29519	0.26	0.81	0.898945	25 to 34	Male	Graduate	Widowed	Rural	Asexual	able-bodied	African	Jewish	lifelong Republican
163	10	5	1	11	6	2	0.37, 0.44	0.93, 1.00	0.37	0.44	0.93	1.00	1.44279	0.256831	0.405	0.965	0.849808	55 to 64	Male	Upper secondary	Widowed	Urban	Asexual	physically-disabled	African	Jewish	Barack Obama Supporter
166	7	4	1	8	5	2	0.17, 0.26	0.80, 0.89	0.17	0.26	0.80	0.89	1.52247	0.307961	0.215	0.845	0.915217	55 to 64	Male	Upper secondary	Widowed	Rural	Heterosexual	physically-disabled	African	Atheist	Donald Trump Supporter
169	7	4	1	8	5	2	0.17, 0.26	0.80, 0.89	0.17	0.26	0.80	0.89	1.52247	0.307961	0.215	0.845	0.915217	35 to 44	Male	Graduate	Widowed	Rural	Bisexual	able-bodied	Caucasian	Religious	Barack Obama Supporter
170	7	6	1	8	7	2	0.25, 0.36	0.71, 0.82	0.25	0.36	0.71	0.82	1.48349	0.282836	0.305	0.765	0.883164	25 to 34	Male	Bachelor	Married	Rural	Homosexual	physically-disabled	Asian	Christian	lifelong Democrat
171	7	3	1	8	4	2	0.12, 0.22	0.84, 0.94	0.12	0.22	0.84	0.94	1.54282	0.321157	0.17	0.89	0.931987	45 to 54	Female	Below lower secondary	Divorced	Urban	Asexual	able-bodied	African	Jewish	lifelong Republican
177	7	3	1	8	4	2	0.12, 0.22	0.84, 0.94	0.12	0.22	0.84	0.94	1.54282	0.321157	0.17	0.89	0.931987	35 to 44	Male	Graduate	Never married	Urban	Bisexual	able-bodied	Asian	Atheist	Barack Obama Supporter
182	7	3	1	8	4	2	0.12, 0.22	0.84, 0.94	0.12	0.22	0.84	0.94	1.54282	0.321157	0.17	0.89	0.931987	45 to 54	Female	Bachelor	Never married	Rural	Bisexual	physically-disabled	Caucasian	Christian	Barack Obama Supporter
192	7	4	1	8	5	2	0.17, 0.26	0.80, 0.89	0.17	0.26	0.80	0.89	1.52247	0.307961	0.215	0.845	0.915217	25 to 34	Female	Lower secondary	Widowed	Urban	Bisexual	physically-disabled	Hispanic	Jewish	lifelong Republican
197	7	4	1	8	5	2	0.17, 0.26	0.80, 0.89	0.17	0.26	0.80	0.89	1.52247	0.307961	0.215	0.845	0.915217	35 to 44	Male	Graduate	Married	Urban	Homosexual	physically-disabled	Caucasian	Jewish	lifelong Democrat
198	7	4	1	8	5	2	0.17, 0.26	0.80, 0.89	0.17	0.26	0.80	0.89	1.52247	0.307961	0.215	0.845	0.915217	Over 65	Male	Bachelor	Married	Rural	Asexual	physically-disabled	African	Religious	Barack Obama Supporter
203	7	4	1	8	5	2	0.17, 0.26	0.80, 0.89	0.17	0.26	0.80	0.89	1.52247	0.307961	0.215	0.845	0.915217	25 to 34	Female	Lower secondary	Married	Rural	Bisexual	physically-disabled	African	Jewish	Barack Obama Supporter
206	6	6	1	7	7	2	0.19, 0.31	0.65, 0.76	0.19	0.31	0.65	0.76	1.50704	0.297992	0.25	0.705	0.902518	25 to 34	Female	Lower secondary	Never married	Urban	Heterosexual	physically-disabled	African	Christian	lifelong Republican
208	7	10	1	8	11	2	0.46, 0.55	0.51, 0.60	0.46	0.55	0.51	0.60	1.40473	0.232745	0.505	0.555	0.818735	45 to 54	Male	Graduate	Married	Rural	Asexual	physically-disabled	Asian	Atheist	Barack Obama Supporter
210	7	5	1	8	6	2	0.22, 0.30	0.77, 0.85	0.22	0.30	0.77	0.85	1.5027	0.29519	0.26	0.81	0.898945	Over 65	Female	Short-cycle tertiary	Never married	Rural	Heterosexual	able-bodied	African	Christian	Barack Obama Supporter
213	7	4	1	8	5	2	0.17, 0.26	0.80, 0.89	0.17	0.26	0.80	0.89	1.52247	0.307961	0.215	0.845	0.915217	45 to 54	Male	Upper secondary	Divorced	Rural	Heterosexual	able-bodied	Hispanic	Christian	lifelong Republican
215	6	4	1	7	5	2	0.11, 0.21	0.74, 0.84	0.11	0.21	0.74	0.84	1.54742	0.324148	0.16	0.79	0.935783	45 to 54	Female	Below lower secondary	Divorced	Urban	Bisexual	able-bodied	Caucasian	Christian	Donald Trump Supporter
217	7	6	1	8	7	2	0.25, 0.36	0.71, 0.82	0.25	0.36	0.71	0.82	1.48349	0.282836	0.305	0.765	0.883164	15 to 24	Male	Lower secondary	Never married	Rural	Asexual	physically-disabled	Asian	Christian	lifelong Republican
222	6	7	1	7	8	2	0.26, 0.36	0.60, 0.70	0.26	0.36	0.60	0.70	1.48139	0.281489	0.31	0.65	0.881441	15 to 24	Male	Upper secondary	Married	Rural	Bisexual	physically-disabled	African	Atheist	lifelong Republican
225	7	6	1	8	7	2	0.25, 0.36	0.71, 0.82	0.25	0.36	0.71	0.82	1.48349	0.282836	0.305	0.765	0.883164	45 to 54	Male	Below lower secondary	Married	Urban	Homosexual	able-bodied	African	Jewish	Barack Obama Supporter
227	7	6	1	8	7	2	0.25, 0.36	0.71, 0.82	0.25	0.36	0.71	0.82	1.48349	0.282836	0.305	0.765	0.883164	25 to 34	Male	Graduate	Never married	Rural	Heterosexual	able-bodied	Asian	Jewish	Donald Trump Supporter
229	7	4	1	8	5	2	0.17, 0.26	0.80, 0.89	0.17	0.26	0.80	0.89	1.52247	0.307961	0.215	0.845	0.915217	55 to 64	Male	Graduate	Never married	Urban	Heterosexual	physically-disabled	Caucasian	Atheist	lifelong Republican
231	7	4	1	8	5	2	0.17, 0.26	0.80, 0.89	0.17	0.26	0.80	0.89	1.52247	0.307961	0.215	0.845	0.915217	15 to 24	Male	Lower secondary	Never married	Urban	Homosexual	able-bodied	Asian	Christian	Donald Trump Supporter
236	10	6	1	11	7	2	0.40, 1.00	0.75, 1.89	0.40	1.00	0.75	1.89	1.33775	0.190949	0.7	1.32	0.76435	15 to 24	Female	Bachelor	Divorced	Urban	Asexual	physically-disabled	African	Jewish	lifelong Democrat
244	6	3	1	7	4	2	0.06, 0.16	0.78, 0.88	0.06	0.16	0.78	0.88	1.57085	0.339429	0.11	0.83	0.95514	35 to 44	Male	Below lower secondary	Never married	Urban	Heterosexual	able-bodied	Asian	Religious	Barack Obama Supporter
254	7	13	1	8	14	2	0.61, 0.69	0.34, 0.44	0.61	0.69	0.34	0.44	1.35404	0.201042	0.65	0.39	0.777541	35 to 44	Female	Bachelor	Married	Urban	Heterosexual	able-bodied	Hispanic	Atheist	lifelong Republican
256	7	3	1	8	4	2	0.12, 0.22	0.84, 0.94	0.12	0.22	0.84	0.94	1.54282	0.321157	0.17	0.89	0.931987	55 to 64	Female	Short-cycle tertiary	Widowed	Urban	Bisexual	able-bodied	African	Religious	Donald Trump Supporter
258	6	7	1	7	8	2	0.26, 0.36	0.60, 0.70	0.26	0.36	0.60	0.70	1.48139	0.281489	0.31	0.65	0.881441	15 to 24	Female	Bachelor	Divorced	Rural	Homosexual	physically-disabled	Hispanic	Atheist	Donald Trump Supporter
260	6	4	1	7	5	2	0.11, 0.21	0.74, 0.84	0.11	0.21	0.74	0.84	1.54742	0.324148	0.16	0.79	0.935783	Over 65	Male	Short-cycle tertiary	Widowed	Urban	Bisexual	able-bodied	Hispanic	Jewish	Donald Trump Supporter
263	7	6	1	8	7	2	0.25, 0.36	0.71, 0.82	0.25	0.36	0.71	0.82	1.48349	0.282836	0.305	0.765	0.883164	Over 65	Female	Upper secondary	Widowed	Rural	Heterosexual	able-bodied	Hispanic	Religious	lifelong Republican
264	6	4	1	7	5	2	0.11, 0.21	0.74, 0.84	0.11	0.21	0.74	0.84	1.54742	0.324148	0.16	0.79	0.935783	25 to 34	Female	Graduate	Widowed	Urban	Heterosexual	physically-disabled	African	Atheist	lifelong Democrat
265	7	6	1	8	7	2	0.25, 0.36	0.71, 0.82	0.25	0.36	0.71	0.82	1.48349	0.282836	0.305	0.765	0.883164	35 to 44	Male	Below lower secondary	Never married	Rural	Bisexual	physically-disabled	Hispanic	Atheist	Barack Obama Supporter
271	7	4	1	8	5	2	0.17, 0.26	0.80, 0.89	0.17	0.26	0.80	0.89	1.52247	0.307961	0.215	0.845	0.915217	Over 65	Female	Graduate	Married	Urban	Homosexual	able-bodied	African	Religious	lifelong Democrat
275	7	6	1	8	7	2	0.25, 0.36	0.71, 0.82	0.25	0.36	0.71	0.82	1.48349	0.282836	0.305	0.765	0.883164	35 to 44	Male	Short-cycle tertiary	Divorced	Rural	Heterosexual	able-bodied	Caucasian	Religious	lifelong Republican
282	7	3	1	8	4	2	0.12, 0.22	0.84, 0.94	0.12	0.22	0.84	0.94	1.54282	0.321157	0.17	0.89	0.931987	Over 65	Male	Short-cycle tertiary	Never married	Rural	Asexual	able-bodied	Asian	Christian	lifelong Republican
285	7	13	1	8	14	2	0.61, 0.69	0.34, 0.44	0.61	0.69	0.34	0.44	1.35404	0.201042	0.65	0.39	0.777541	Over 65	Male	Lower secondary	Widowed	Rural	Homosexual	physically-disabled	Caucasian	Jewish	Barack Obama Supporter
287	7	5	1	8	6	2	0.22, 0.30	0.77, 0.85	0.22	0.30	0.77	0.85	1.5027	0.29519	0.26	0.81	0.898945	25 to 34	Male	Short-cycle tertiary	Never married	Urban	Heterosexual	able-bodied	Hispanic	Christian	Donald Trump Supporter
290	7	5	1	8	6	2	0.22, 0.30	0.77, 0.85	0.22	0.30	0.77	0.85	1.5027	0.29519	0.26	0.81	0.898945	35 to 44	Female	Graduate	Never married	Urban	Asexual	able-bodied	Asian	Jewish	Donald Trump Supporter
295	7	4	1	8	5	2	0.17, 0.26	0.80, 0.89	0.17	0.26	0.80	0.89	1.52247	0.307961	0.215	0.845	0.915217	35 to 44	Male	Graduate	Divorced	Rural	Homosexual	able-bodied	Asian	Jewish	Donald Trump Supporter
238	7	5	2	8	6	3	0.22, 0.30	0.77, 0.85	0.22	0.30	0.77	0.85	1.7828	1.5027	0.26	0.81	1.64275	25 to 34	Female	Short-cycle tertiary	Never married	Rural	Homosexual	physically-disabled	Hispanic	Religious	Donald Trump Supporter
2	6	4	3	7	5	4	0.11, 0.21	0.74, 0.84	0.11	0.21	0.74	0.84	1.78754	1.54742	0.16	0.79	1.66748	15 to 24	Female	Upper secondary	Never married	Rural	Asexual	able-bodied	Hispanic	Christian	lifelong Republican
4	8	4	3	9	5	4	0.23, 0.30	0.86, 0.93	0.23	0.30	0.86	0.93	1.7828	1.50054	0.265	0.895	1.64167	55 to 64	Female	Below lower secondary	Never married	Urban	Bisexual	able-bodied	Hispanic	Religious	Barack Obama Supporter
5	7	4	3	8	5	4	0.17, 0.26	0.80, 0.89	0.17	0.26	0.80	0.89	1.78383	1.52247	0.215	0.845	1.65315	25 to 34	Male	Short-cycle tertiary	Married	Urban	Bisexual	able-bodied	Hispanic	Religious	lifelong Democrat
8	7	5	3	8	6	4	0.22, 0.30	0.77, 0.85	0.22	0.30	0.77	0.85	1.7828	1.5027	0.26	0.81	1.64275	Over 65	Male	Short-cycle tertiary	Widowed	Rural	Heterosexual	able-bodied	Caucasian	Jewish	Donald Trump Supporter
9	7	5	3	8	6	4	0.22, 0.30	0.77, 0.85	0.22	0.30	0.77	0.85	1.7828	1.5027	0.26	0.81	1.64275	25 to 34	Male	Lower secondary	Divorced	Rural	Bisexual	physically-disabled	Asian	Atheist	lifelong Republican
10	7	6	3	8	7	4	0.25, 0.36	0.71, 0.82	0.25	0.36	0.71	0.82	1.78364	1.48349	0.305	0.765	1.63357	45 to 54	Male	Lower secondary	Divorced	Urban	Homosexual	physically-disabled	Asian	Jewish	Barack Obama Supporter
11	7	4	3	8	5	4	0.17, 0.26	0.80, 0.89	0.17	0.26	0.80	0.89	1.78383	1.52247	0.215	0.845	1.65315	15 to 24	Female	Upper secondary	Divorced	Urban	Bisexual	able-bodied	Caucasian	Atheist	Barack Obama Supporter
12	8	5	3	9	6	4	0.27, 0.34	0.82, 0.89	0.27	0.34	0.82	0.89	1.78364	1.48349	0.305	0.855	1.63357	25 to 34	Female	Short-cycle tertiary	Divorced	Rural	Bisexual	physically-disabled	Hispanic	Jewish	Donald Trump Supporter
13	7	2	3	8	3	4	0.06, 0.17	0.89, 0.99	0.06	0.17	0.89	0.99	1.79249	1.56847	0.115	0.94	1.68048	35 to 44	Male	Below lower secondary	Divorced	Rural	Bisexual	physically-disabled	Asian	Religious	lifelong Democrat
14	7	5	3	8	6	4	0.22, 0.30	0.77, 0.85	0.22	0.30	0.77	0.85	1.7828	1.5027	0.26	0.81	1.64275	45 to 54	Male	Short-cycle tertiary	Never married	Rural	Bisexual	physically-disabled	Hispanic	Christian	lifelong Democrat
15	7	6	3	8	7	4	0.25, 0.36	0.71, 0.82	0.25	0.36	0.71	0.82	1.78364	1.48349	0.305	0.765	1.63357	15 to 24	Female	Graduate	Married	Urban	Asexual	able-bodied	African	Jewish	lifelong Republican
16	9	7	3	10	8	4	0.40, 1.00	0.75, 1.89	0.40	1.00	0.75	1.89	1.88595	1.33775	0.7	1.32	1.61185	45 to 54	Male	Graduate	Never married	Rural	Heterosexual	able-bodied	Hispanic	Atheist	Donald Trump Supporter
18	7	4	3	8	5	4	0.17, 0.26	0.80, 0.89	0.17	0.26	0.80	0.89	1.78383	1.52247	0.215	0.845	1.65315	35 to 44	Male	Below lower secondary	Divorced	Urban	Asexual	able-bodied	Hispanic	Jewish	Donald Trump Supporter
21	8	5	3	9	6	4	0.27, 0.34	0.82, 0.89	0.27	0.34	0.82	0.89	1.78364	1.48349	0.305	0.855	1.63357	45 to 54	Male	Below lower secondary	Divorced	Rural	Homosexual	able-bodied	African	Jewish	lifelong Democrat
22	7	5	3	8	6	4	0.22, 0.30	0.77, 0.85	0.22	0.30	0.77	0.85	1.7828	1.5027	0.26	0.81	1.64275	15 to 24	Female	Below lower secondary	Widowed	Urban	Heterosexual	physically-disabled	Caucasian	Christian	Donald Trump Supporter
24	8	7	3	9	8	4	0.36, 0.44	0.71, 0.80	0.36	0.44	0.71	0.80	1.79195	1.44476	0.4	0.755	1.61836	55 to 64	Female	Short-cycle tertiary	Widowed	Rural	Asexual	able-bodied	African	Christian	Barack Obama Supporter
25	7	4	3	8	5	4	0.17, 0.26	0.80, 0.89	0.17	0.26	0.80	0.89	1.78383	1.52247	0.215	0.845	1.65315	45 to 54	Male	Bachelor	Widowed	Rural	Asexual	able-bodied	Hispanic	Christian	Barack Obama Supporter
28	7	4	3	8	5	4	0.17, 0.26	0.80, 0.89	0.17	0.26	0.80	0.89	1.78383	1.52247	0.215	0.845	1.65315	15 to 24	Male	Bachelor	Never married	Rural	Homosexual	able-bodied	Asian	Religious	lifelong Republican
29	7	4	3	8	5	4	0.17, 0.26	0.80, 0.89	0.17	0.26	0.80	0.89	1.78383	1.52247	0.215	0.845	1.65315	35 to 44	Male	Graduate	Widowed	Urban	Asexual	physically-disabled	Hispanic	Jewish	lifelong Republican
32	7	6	3	8	7	4	0.25, 0.36	0.71, 0.82	0.25	0.36	0.71	0.82	1.78364	1.48349	0.305	0.765	1.63357	55 to 64	Female	Lower secondary	Widowed	Rural	Heterosexual	physically-disabled	Hispanic	Jewish	lifelong Republican
33	7	4	3	8	5	4	0.17, 0.26	0.80, 0.89	0.17	0.26	0.80	0.89	1.78383	1.52247	0.215	0.845	1.65315	35 to 44	Male	Bachelor	Divorced	Rural	Asexual	physically-disabled	Caucasian	Religious	Donald Trump Supporter
36	7	6	3	8	7	4	0.25, 0.36	0.71, 0.82	0.25	0.36	0.71	0.82	1.78364	1.48349	0.305	0.765	1.63357	55 to 64	Male	Lower secondary	Divorced	Rural	Heterosexual	physically-disabled	African	Atheist	lifelong Republican
37	7	6	3	8	7	4	0.25, 0.36	0.71, 0.82	0.25	0.36	0.71	0.82	1.78364	1.48349	0.305	0.765	1.63357	25 to 34	Male	Short-cycle tertiary	Never married	Urban	Asexual	able-bodied	African	Religious	lifelong Republican
38	8	3	3	9	4	4	0.18, 0.26	0.90, 0.98	0.18	0.26	0.90	0.98	1.78363	1.52025	0.22	0.94	1.65194	55 to 64	Female	Below lower secondary	Widowed	Rural	Heterosexual	physically-disabled	African	Jewish	Barack Obama Supporter
40	7	5	3	8	6	4	0.22, 0.30	0.77, 0.85	0.22	0.30	0.77	0.85	1.7828	1.5027	0.26	0.81	1.64275	35 to 44	Female	Lower secondary	Divorced	Urban	Bisexual	physically-disabled	African	Atheist	Barack Obama Supporter
41	8	6	3	9	7	4	0.31, 0.39	0.76, 0.86	0.31	0.39	0.76	0.86	1.78644	1.46484	0.35	0.81	1.62564	15 to 24	Female	Short-cycle tertiary	Widowed	Rural	Bisexual	physically-disabled	Asian	Atheist	Barack Obama Supporter
42	7	13	3	8	14	4	0.61, 0.69	0.34, 0.44	0.61	0.69	0.34	0.44	1.86223	1.35404	0.65	0.39	1.60814	25 to 34	Female	Graduate	Married	Urban	Bisexual	physically-disabled	Caucasian	Religious	Barack Obama Supporter
43	7	4	3	8	5	4	0.17, 0.26	0.80, 0.89	0.17	0.26	0.80	0.89	1.78383	1.52247	0.215	0.845	1.65315	Over 65	Female	Graduate	Divorced	Urban	Homosexual	able-bodied	Asian	Jewish	Barack Obama Supporter
44	7	4	3	8	5	4	0.17, 0.26	0.80, 0.89	0.17	0.26	0.80	0.89	1.78383	1.52247	0.215	0.845	1.65315	15 to 24	Male	Below lower secondary	Never married	Urban	Asexual	able-bodied	African	Christian	Barack Obama Supporter
45	9	6	3	10	7	4	0.34, 1.00	0.75, 1.89	0.34	1.00	0.75	1.89	1.87129	1.34745	0.67	1.32	1.60937	25 to 34	Female	Upper secondary	Never married	Rural	Asexual	physically-disabled	Hispanic	Atheist	lifelong Republican
47	7	4	3	8	5	4	0.17, 0.26	0.80, 0.89	0.17	0.26	0.80	0.89	1.78383	1.52247	0.215	0.845	1.65315	45 to 54	Male	Upper secondary	Never married	Rural	Asexual	physically-disabled	Asian	Jewish	Barack Obama Supporter
49	8	5	3	9	6	4	0.27, 0.34	0.82, 0.89	0.27	0.34	0.82	0.89	1.78364	1.48349	0.305	0.855	1.63357	Over 65	Female	Graduate	Widowed	Rural	Homosexual	able-bodied	Caucasian	Atheist	lifelong Democrat
50	7	5	3	8	6	4	0.22, 0.30	0.77, 0.85	0.22	0.30	0.77	0.85	1.7828	1.5027	0.26	0.81	1.64275	35 to 44	Female	Upper secondary	Divorced	Rural	Homosexual	able-bodied	Hispanic	Atheist	lifelong Republican
51	8	4	3	9	5	4	0.23, 0.30	0.86, 0.93	0.23	0.30	0.86	0.93	1.7828	1.50054	0.265	0.895	1.64167	45 to 54	Female	Below lower secondary	Never married	Rural	Bisexual	physically-disabled	Caucasian	Jewish	lifelong Republican
53	7	4	3	8	5	4	0.17, 0.26	0.80, 0.89	0.17	0.26	0.80	0.89	1.78383	1.52247	0.215	0.845	1.65315	15 to 24	Female	Lower secondary	Never married	Urban	Bisexual	able-bodied	African	Christian	Barack Obama Supporter
54	8	1	3	9	2	4	0.06, 0.16	0.99, 1.09	0.06	0.16	0.99	1.09	1.79314	1.57085	0.11	1.04	1.68199	45 to 54	Male	Bachelor	Never married	Urban	Asexual	physically-disabled	Hispanic	Christian	Barack Obama Supporter
55	7	4	3	8	5	4	0.17, 0.26	0.80, 0.89	0.17	0.26	0.80	0.89	1.78383	1.52247	0.215	0.845	1.65315	35 to 44	Female	Short-cycle tertiary	Widowed	Urban	Bisexual	physically-disabled	African	Atheist	Barack Obama Supporter
56	8	6	3	9	7	4	0.31, 0.39	0.76, 0.86	0.31	0.39	0.76	0.86	1.78644	1.46484	0.35	0.81	1.62564	35 to 44	Female	Graduate	Married	Urban	Asexual	able-bodied	African	Religious	Donald Trump Supporter
57	7	5	3	8	6	4	0.22, 0.30	0.77, 0.85	0.22	0.30	0.77	0.85	1.7828	1.5027	0.26	0.81	1.64275	15 to 24	Female	Upper secondary	Divorced	Urban	Asexual	physically-disabled	Hispanic	Atheist	lifelong Democrat
59	7	4	3	8	5	4	0.17, 0.26	0.80, 0.89	0.17	0.26	0.80	0.89	1.78383	1.52247	0.215	0.845	1.65315	45 to 54	Female	Short-cycle tertiary	Married	Rural	Bisexual	able-bodied	African	Atheist	lifelong Democrat
61	7	8	3	8	9	4	0.37, 0.45	0.62, 0.70	0.37	0.45	0.62	0.70	1.79337	1.44082	0.41	0.66	1.6171	45 to 54	Female	Lower secondary	Never married	Urban	Bisexual	physically-disabled	African	Christian	lifelong Republican
62	9	7	3	10	8	4	0.40, 1.00	0.75, 1.89	0.40	1.00	0.75	1.89	1.88595	1.33775	0.7	1.32	1.61185	45 to 54	Male	Graduate	Divorced	Urban	Bisexual	able-bodied	Hispanic	Religious	Barack Obama Supporter
63	7	5	3	8	6	4	0.22, 0.30	0.77, 0.85	0.22	0.30	0.77	0.85	1.7828	1.5027	0.26	0.81	1.64275	15 to 24	Male	Lower secondary	Widowed	Rural	Heterosexual	able-bodied	Hispanic	Religious	lifelong Democrat
64	7	1	3	8	2	4	-0.01, 0.12	0.94, 1.05	-0.0	0.12	0.94	1.05	1.80077	1.59502	0.06	0.995	1.69789	35 to 44	Male	Lower secondary	Divorced	Rural	Heterosexual	physically-disabled	Hispanic	Religious	lifelong Democrat
65	7	6	3	8	7	4	0.25, 0.36	0.71, 0.82	0.25	0.36	0.71	0.82	1.78364	1.48349	0.305	0.765	1.63357	55 to 64	Female	Bachelor	Married	Rural	Bisexual	physically-disabled	Caucasian	Christian	Barack Obama Supporter
66	7	5	3	8	6	4	0.22, 0.30	0.77, 0.85	0.22	0.30	0.77	0.85	1.7828	1.5027	0.26	0.81	1.64275	25 to 34	Female	Below lower secondary	Never married	Rural	Homosexual	able-bodied	African	Religious	lifelong Republican
68	8	5	3	9	6	4	0.27, 0.34	0.82, 0.89	0.27	0.34	0.82	0.89	1.78364	1.48349	0.305	0.855	1.63357	35 to 44	Female	Bachelor	Married	Urban	Heterosexual	able-bodied	Caucasian	Religious	lifelong Republican
69	7	5	3	8	6	4	0.22, 0.30	0.77, 0.85	0.22	0.30	0.77	0.85	1.7828	1.5027	0.26	0.81	1.64275	25 to 34	Female	Below lower secondary	Divorced	Rural	Asexual	able-bodied	Hispanic	Jewish	Donald Trump Supporter
71	7	5	3	8	6	4	0.22, 0.30	0.77, 0.85	0.22	0.30	0.77	0.85	1.7828	1.5027	0.26	0.81	1.64275	Over 65	Male	Short-cycle tertiary	Widowed	Urban	Homosexual	able-bodied	Caucasian	Christian	lifelong Democrat
73	7	4	3	8	5	4	0.17, 0.26	0.80, 0.89	0.17	0.26	0.80	0.89	1.78383	1.52247	0.215	0.845	1.65315	35 to 44	Male	Upper secondary	Married	Rural	Heterosexual	physically-disabled	Asian	Religious	Donald Trump Supporter
74	8	6	3	9	7	4	0.31, 0.39	0.76, 0.86	0.31	0.39	0.76	0.86	1.78644	1.46484	0.35	0.81	1.62564	35 to 44	Female	Graduate	Married	Urban	Homosexual	able-bodied	Caucasian	Christian	lifelong Democrat
75	7	6	3	8	7	4	0.25, 0.36	0.71, 0.82	0.25	0.36	0.71	0.82	1.78364	1.48349	0.305	0.765	1.63357	25 to 34	Male	Lower secondary	Never married	Rural	Heterosexual	physically-disabled	African	Religious	Donald Trump Supporter
76	7	6	3	8	7	4	0.25, 0.36	0.71, 0.82	0.25	0.36	0.71	0.82	1.78364	1.48349	0.305	0.765	1.63357	45 to 54	Female	Short-cycle tertiary	Married	Rural	Homosexual	able-bodied	Hispanic	Christian	lifelong Republican
78	7	4	3	8	5	4	0.17, 0.26	0.80, 0.89	0.17	0.26	0.80	0.89	1.78383	1.52247	0.215	0.845	1.65315	Over 65	Female	Graduate	Married	Urban	Asexual	able-bodied	African	Christian	lifelong Democrat
79	7	2	3	8	3	4	0.06, 0.17	0.89, 0.99	0.06	0.17	0.89	0.99	1.79249	1.56847	0.115	0.94	1.68048	55 to 64	Male	Lower secondary	Widowed	Rural	Bisexual	physically-disabled	Asian	Religious	lifelong Democrat
80	7	5	3	8	6	4	0.22, 0.30	0.77, 0.85	0.22	0.30	0.77	0.85	1.7828	1.5027	0.26	0.81	1.64275	45 to 54	Male	Short-cycle tertiary	Divorced	Urban	Asexual	physically-disabled	Hispanic	Religious	lifelong Republican
81	7	5	3	8	6	4	0.22, 0.30	0.77, 0.85	0.22	0.30	0.77	0.85	1.7828	1.5027	0.26	0.81	1.64275	45 to 54	Female	Bachelor	Divorced	Urban	Bisexual	able-bodied	Hispanic	Jewish	Barack Obama Supporter
83	8	5	3	9	6	4	0.27, 0.34	0.82, 0.89	0.27	0.34	0.82	0.89	1.78364	1.48349	0.305	0.855	1.63357	15 to 24	Female	Lower secondary	Never married	Urban	Heterosexual	physically-disabled	African	Religious	Barack Obama Supporter
84	6	4	3	7	5	4	0.11, 0.21	0.74, 0.84	0.11	0.21	0.74	0.84	1.78754	1.54742	0.16	0.79	1.66748	45 to 54	Male	Lower secondary	Never married	Rural	Asexual	physically-disabled	Caucasian	Religious	lifelong Republican
85	7	4	3	8	5	4	0.17, 0.26	0.80, 0.89	0.17	0.26	0.80	0.89	1.78383	1.52247	0.215	0.845	1.65315	Over 65	Female	Lower secondary	Never married	Rural	Bisexual	physically-disabled	Hispanic	Atheist	lifelong Republican
86	8	7	3	9	8	4	0.36, 0.44	0.71, 0.80	0.36	0.44	0.71	0.80	1.79195	1.44476	0.4	0.755	1.61836	15 to 24	Female	Graduate	Married	Urban	Bisexual	physically-disabled	Caucasian	Christian	Barack Obama Supporter
87	7	6	3	8	7	4	0.25, 0.36	0.71, 0.82	0.25	0.36	0.71	0.82	1.78364	1.48349	0.305	0.765	1.63357	15 to 24	Male	Below lower secondary	Never married	Rural	Homosexual	physically-disabled	Asian	Atheist	Donald Trump Supporter
89	7	12	3	8	13	4	0.57, 0.64	0.40, 0.49	0.57	0.64	0.40	0.49	1.84384	1.36921	0.605	0.445	1.60653	35 to 44	Male	Graduate	Never married	Rural	Asexual	able-bodied	Hispanic	Jewish	lifelong Democrat
90	7	6	3	8	7	4	0.25, 0.36	0.71, 0.82	0.25	0.36	0.71	0.82	1.78364	1.48349	0.305	0.765	1.63357	Over 65	Female	Short-cycle tertiary	Widowed	Urban	Homosexual	physically-disabled	Asian	Jewish	Donald Trump Supporter
92	9	5	3	10	6	4	0.31, 0.40	0.87, 0.96	0.31	0.40	0.87	0.96	1.78688	1.4628	0.355	0.915	1.62484	45 to 54	Male	Short-cycle tertiary	Married	Urban	Asexual	able-bodied	Caucasian	Religious	lifelong Republican
93	7	5	3	8	6	4	0.22, 0.30	0.77, 0.85	0.22	0.30	0.77	0.85	1.7828	1.5027	0.26	0.81	1.64275	Over 65	Male	Graduate	Never married	Rural	Homosexual	able-bodied	African	Jewish	lifelong Democrat
94	7	5	3	8	6	4	0.22, 0.30	0.77, 0.85	0.22	0.30	0.77	0.85	1.7828	1.5027	0.26	0.81	1.64275	35 to 44	Female	Bachelor	Divorced	Rural	Homosexual	able-bodied	Caucasian	Religious	lifelong Democrat
95	7	3	3	8	4	4	0.12, 0.22	0.84, 0.94	0.12	0.22	0.84	0.94	1.78667	1.54282	0.17	0.89	1.66474	55 to 64	Female	Below lower secondary	Married	Urban	Homosexual	physically-disabled	African	Religious	lifelong Republican
96	7	6	3	8	7	4	0.25, 0.36	0.71, 0.82	0.25	0.36	0.71	0.82	1.78364	1.48349	0.305	0.765	1.63357	55 to 64	Male	Below lower secondary	Married	Urban	Homosexual	able-bodied	African	Jewish	Donald Trump Supporter
98	8	6	3	9	7	4	0.31, 0.39	0.76, 0.86	0.31	0.39	0.76	0.86	1.78644	1.46484	0.35	0.81	1.62564	55 to 64	Male	Upper secondary	Never married	Urban	Asexual	physically-disabled	Caucasian	Christian	Donald Trump Supporter
99	7	3	3	8	4	4	0.12, 0.22	0.84, 0.94	0.12	0.22	0.84	0.94	1.78667	1.54282	0.17	0.89	1.66474	55 to 64	Female	Below lower secondary	Widowed	Rural	Homosexual	physically-disabled	Caucasian	Atheist	lifelong Republican
103	6	4	3	7	5	4	0.11, 0.21	0.74, 0.84	0.11	0.21	0.74	0.84	1.78754	1.54742	0.16	0.79	1.66748	35 to 44	Female	Graduate	Married	Urban	Homosexual	able-bodied	African	Atheist	lifelong Democrat
105	8	8	3	9	9	4	0.41, 0.48	0.67, 0.74	0.41	0.48	0.67	0.74	1.79918	1.42725	0.445	0.705	1.61321	55 to 64	Male	Short-cycle tertiary	Divorced	Rural	Homosexual	able-bodied	Caucasian	Jewish	lifelong Democrat
106	7	4	3	8	5	4	0.17, 0.26	0.80, 0.89	0.17	0.26	0.80	0.89	1.78383	1.52247	0.215	0.845	1.65315	55 to 64	Female	Lower secondary	Never married	Urban	Homosexual	physically-disabled	Caucasian	Atheist	lifelong Democrat
107	8	3	3	9	4	4	0.18, 0.26	0.90, 0.98	0.18	0.26	0.90	0.98	1.78363	1.52025	0.22	0.94	1.65194	25 to 34	Female	Short-cycle tertiary	Never married	Rural	Homosexual	able-bodied	Asian	Jewish	lifelong Democrat
108	7	10	3	8	11	4	0.46, 0.55	0.51, 0.60	0.46	0.55	0.51	0.60	1.81233	1.40473	0.505	0.555	1.60853	45 to 54	Female	Graduate	Divorced	Rural	Asexual	able-bodied	Caucasian	Christian	lifelong Democrat
110	9	7	3	10	8	4	0.40, 1.00	0.75, 1.89	0.40	1.00	0.75	1.89	1.88595	1.33775	0.7	1.32	1.61185	25 to 34	Female	Short-cycle tertiary	Never married	Urban	Bisexual	physically-disabled	Caucasian	Religious	lifelong Democrat
111	7	5	3	8	6	4	0.22, 0.30	0.77, 0.85	0.22	0.30	0.77	0.85	1.7828	1.5027	0.26	0.81	1.64275	25 to 34	Male	Short-cycle tertiary	Widowed	Urban	Asexual	physically-disabled	Hispanic	Christian	lifelong Republican
112	9	13	3	10	14	4	0.67, 1.00	0.42, 1.89	0.67	1.00	0.42	1.89	1.9689	1.29667	0.835	1.155	1.63279	55 to 64	Male	Bachelor	Divorced	Urban	Bisexual	physically-disabled	Asian	Christian	lifelong Republican
113	7	5	3	8	6	4	0.22, 0.30	0.77, 0.85	0.22	0.30	0.77	0.85	1.7828	1.5027	0.26	0.81	1.64275	Over 65	Female	Below lower secondary	Married	Rural	Asexual	able-bodied	Caucasian	Atheist	Barack Obama Supporter
115	7	4	3	8	5	4	0.17, 0.26	0.80, 0.89	0.17	0.26	0.80	0.89	1.78383	1.52247	0.215	0.845	1.65315	55 to 64	Female	Lower secondary	Divorced	Rural	Bisexual	able-bodied	African	Jewish	Donald Trump Supporter
116	6	0	3	7	1	4	#N/A	#N/A	#N/A	#N/A	#N/A	#N/A	#N/A	#N/A	#N/A	#N/A	#N/A	15 to 24	Male	Upper secondary	Married	Urban	Asexual	able-bodied	African	Atheist	lifelong Republican
117	7	6	3	8	7	4	0.25, 0.36	0.71, 0.82	0.25	0.36	0.71	0.82	1.78364	1.48349	0.305	0.765	1.63357	25 to 34	Male	Bachelor	Divorced	Urban	Heterosexual	able-bodied	Asian	Religious	Barack Obama Supporter
119	7	4	3	8	5	4	0.17, 0.26	0.80, 0.89	0.17	0.26	0.80	0.89	1.78383	1.52247	0.215	0.845	1.65315	55 to 64	Male	Below lower secondary	Divorced	Rural	Asexual	physically-disabled	African	Christian	lifelong Republican
120	7	6	3	8	7	4	0.25, 0.36	0.71, 0.82	0.25	0.36	0.71	0.82	1.78364	1.48349	0.305	0.765	1.63357	45 to 54	Female	Graduate	Widowed	Urban	Heterosexual	able-bodied	Caucasian	Jewish	lifelong Republican
121	7	4	3	8	5	4	0.17, 0.26	0.80, 0.89	0.17	0.26	0.80	0.89	1.78383	1.52247	0.215	0.845	1.65315	Over 65	Female	Short-cycle tertiary	Widowed	Urban	Asexual	physically-disabled	Asian	Christian	Barack Obama Supporter
122	7	4	3	8	5	4	0.17, 0.26	0.80, 0.89	0.17	0.26	0.80	0.89	1.78383	1.52247	0.215	0.845	1.65315	25 to 34	Male	Bachelor	Married	Urban	Heterosexual	physically-disabled	African	Religious	Donald Trump Supporter
124	8	4	3	9	5	4	0.23, 0.30	0.86, 0.93	0.23	0.30	0.86	0.93	1.7828	1.50054	0.265	0.895	1.64167	Over 65	Male	Below lower secondary	Never married	Urban	Bisexual	physically-disabled	Caucasian	Jewish	lifelong Democrat
125	8	5	3	9	6	4	0.27, 0.34	0.82, 0.89	0.27	0.34	0.82	0.89	1.78364	1.48349	0.305	0.855	1.63357	45 to 54	Female	Lower secondary	Married	Rural	Heterosexual	able-bodied	Hispanic	Atheist	Barack Obama Supporter
126	8	5	3	9	6	4	0.27, 0.34	0.82, 0.89	0.27	0.34	0.82	0.89	1.78364	1.48349	0.305	0.855	1.63357	55 to 64	Female	Short-cycle tertiary	Divorced	Rural	Asexual	physically-disabled	Asian	Jewish	Barack Obama Supporter
127	7	5	3	8	6	4	0.22, 0.30	0.77, 0.85	0.22	0.30	0.77	0.85	1.7828	1.5027	0.26	0.81	1.64275	Over 65	Female	Short-cycle tertiary	Married	Urban	Homosexual	able-bodied	Caucasian	Christian	Barack Obama Supporter
129	9	6	3	10	7	4	0.34, 1.00	0.75, 1.89	0.34	1.00	0.75	1.89	1.87129	1.34745	0.67	1.32	1.60937	15 to 24	Male	Below lower secondary	Never married	Rural	Asexual	able-bodied	African	Jewish	Donald Trump Supporter
130	10	4	3	11	5	4	0.33, 1.00	0.75, 1.89	0.33	1.00	0.75	1.89	1.86898	1.34909	0.665	1.32	1.60903	45 to 54	Female	Lower secondary	Never married	Urban	Asexual	able-bodied	Caucasian	Christian	lifelong Democrat
132	7	0	3	8	1	4	#N/A	#N/A	#N/A	#N/A	#N/A	#N/A	#N/A	#N/A	#N/A	#N/A	#N/A	15 to 24	Female	Bachelor	Never married	Rural	Heterosexual	able-bodied	Hispanic	Atheist	Donald Trump Supporter
133	8	7	3	9	8	4	0.36, 0.44	0.71, 0.80	0.36	0.44	0.71	0.80	1.79195	1.44476	0.4	0.755	1.61836	15 to 24	Female	Short-cycle tertiary	Married	Urban	Heterosexual	able-bodied	Hispanic	Jewish	Barack Obama Supporter
134	7	4	3	8	5	4	0.17, 0.26	0.80, 0.89	0.17	0.26	0.80	0.89	1.78383	1.52247	0.215	0.845	1.65315	25 to 34	Female	Upper secondary	Divorced	Urban	Heterosexual	physically-disabled	African	Jewish	lifelong Republican
135	7	6	3	8	7	4	0.25, 0.36	0.71, 0.82	0.25	0.36	0.71	0.82	1.78364	1.48349	0.305	0.765	1.63357	55 to 64	Female	Below lower secondary	Never married	Rural	Bisexual	physically-disabled	Asian	Jewish	lifelong Republican
136	7	5	3	8	6	4	0.22, 0.30	0.77, 0.85	0.22	0.30	0.77	0.85	1.7828	1.5027	0.26	0.81	1.64275	35 to 44	Female	Lower secondary	Never married	Urban	Heterosexual	physically-disabled	Hispanic	Christian	Donald Trump Supporter
138	8	7	3	9	8	4	0.36, 0.44	0.71, 0.80	0.36	0.44	0.71	0.80	1.79195	1.44476	0.4	0.755	1.61836	45 to 54	Female	Upper secondary	Married	Urban	Heterosexual	physically-disabled	Asian	Atheist	Barack Obama Supporter
139	7	7	3	8	8	4	0.32, 0.41	0.66, 0.75	0.32	0.41	0.66	0.75	1.78782	1.45875	0.365	0.705	1.62328	15 to 24	Male	Short-cycle tertiary	Never married	Rural	Bisexual	able-bodied	African	Atheist	Donald Trump Supporter
140	7	4	3	8	5	4	0.17, 0.26	0.80, 0.89	0.17	0.26	0.80	0.89	1.78383	1.52247	0.215	0.845	1.65315	55 to 64	Male	Upper secondary	Never married	Rural	Heterosexual	able-bodied	Hispanic	Jewish	Barack Obama Supporter
142	7	4	3	8	5	4	0.17, 0.26	0.80, 0.89	0.17	0.26	0.80	0.89	1.78383	1.52247	0.215	0.845	1.65315	45 to 54	Female	Below lower secondary	Widowed	Urban	Heterosexual	physically-disabled	African	Religious	lifelong Republican
143	8	5	3	9	6	4	0.27, 0.34	0.82, 0.89	0.27	0.34	0.82	0.89	1.78364	1.48349	0.305	0.855	1.63357	Over 65	Female	Upper secondary	Divorced	Rural	Asexual	able-bodied	Hispanic	Atheist	lifelong Democrat
144	7	4	3	8	5	4	0.17, 0.26	0.80, 0.89	0.17	0.26	0.80	0.89	1.78383	1.52247	0.215	0.845	1.65315	15 to 24	Female	Bachelor	Widowed	Urban	Asexual	physically-disabled	Hispanic	Christian	lifelong Republican
145	7	4	3	8	5	4	0.17, 0.26	0.80, 0.89	0.17	0.26	0.80	0.89	1.78383	1.52247	0.215	0.845	1.65315	45 to 54	Male	Graduate	Divorced	Urban	Asexual	able-bodied	Hispanic	Religious	Donald Trump Supporter
146	7	5	3	8	6	4	0.22, 0.30	0.77, 0.85	0.22	0.30	0.77	0.85	1.7828	1.5027	0.26	0.81	1.64275	45 to 54	Male	Below lower secondary	Married	Rural	Bisexual	able-bodied	Hispanic	Jewish	lifelong Republican
148	7	0	3	8	1	4	#N/A	#N/A	#N/A	#N/A	#N/A	#N/A	#N/A	#N/A	#N/A	#N/A	#N/A	55 to 64	Male	Graduate	Divorced	Urban	Bisexual	able-bodied	Asian	Atheist	lifelong Republican
149	7	6	3	8	7	4	0.25, 0.36	0.71, 0.82	0.25	0.36	0.71	0.82	1.78364	1.48349	0.305	0.765	1.63357	25 to 34	Female	Short-cycle tertiary	Never married	Rural	Heterosexual	able-bodied	African	Jewish	lifelong Democrat
151	9	13	3	10	14	4	0.67, 1.00	0.42, 1.89	0.67	1.00	0.42	1.89	1.9689	1.29667	0.835	1.155	1.63279	Over 65	Female	Short-cycle tertiary	Widowed	Rural	Bisexual	physically-disabled	Caucasian	Atheist	Barack Obama Supporter
154	7	4	3	8	5	4	0.17, 0.26	0.80, 0.89	0.17	0.26	0.80	0.89	1.78383	1.52247	0.215	0.845	1.65315	35 to 44	Female	Short-cycle tertiary	Divorced	Urban	Bisexual	physically-disabled	Hispanic	Jewish	lifelong Republican
155	7	5	3	8	6	4	0.22, 0.30	0.77, 0.85	0.22	0.30	0.77	0.85	1.7828	1.5027	0.26	0.81	1.64275	55 to 64	Female	Short-cycle tertiary	Widowed	Urban	Heterosexual	physically-disabled	African	Jewish	Barack Obama Supporter
156	7	5	3	8	6	4	0.22, 0.30	0.77, 0.85	0.22	0.30	0.77	0.85	1.7828	1.5027	0.26	0.81	1.64275	Over 65	Female	Bachelor	Never married	Rural	Homosexual	able-bodied	Asian	Jewish	lifelong Democrat
158	7	6	3	8	7	4	0.25, 0.36	0.71, 0.82	0.25	0.36	0.71	0.82	1.78364	1.48349	0.305	0.765	1.63357	45 to 54	Male	Short-cycle tertiary	Divorced	Urban	Homosexual	able-bodied	Caucasian	Christian	lifelong Democrat
159	7	6	3	8	7	4	0.25, 0.36	0.71, 0.82	0.25	0.36	0.71	0.82	1.78364	1.48349	0.305	0.765	1.63357	35 to 44	Male	Graduate	Never married	Rural	Heterosexual	physically-disabled	Caucasian	Atheist	lifelong Republican
161	7	4	3	8	5	4	0.17, 0.26	0.80, 0.89	0.17	0.26	0.80	0.89	1.78383	1.52247	0.215	0.845	1.65315	Over 65	Male	Graduate	Widowed	Rural	Bisexual	physically-disabled	African	Jewish	lifelong Republican
162	8	7	3	9	8	4	0.36, 0.44	0.71, 0.80	0.36	0.44	0.71	0.80	1.79195	1.44476	0.4	0.755	1.61836	45 to 54	Female	Bachelor	Divorced	Urban	Heterosexual	able-bodied	African	Christian	Donald Trump Supporter
164	6	6	3	7	7	4	0.19, 0.31	0.65, 0.76	0.19	0.31	0.65	0.76	1.78287	1.50704	0.25	0.705	1.64496	55 to 64	Male	Upper secondary	Married	Rural	Asexual	physically-disabled	Caucasian	Christian	Donald Trump Supporter
165	7	0	3	8	1	4	#N/A	#N/A	#N/A	#N/A	#N/A	#N/A	#N/A	#N/A	#N/A	#N/A	#N/A	Over 65	Male	Bachelor	Married	Urban	Homosexual	able-bodied	Hispanic	Jewish	lifelong Democrat
167	7	0	3	8	1	4	#N/A	#N/A	#N/A	#N/A	#N/A	#N/A	#N/A	#N/A	#N/A	#N/A	#N/A	15 to 24	Male	Below lower secondary	Married	Rural	Asexual	able-bodied	African	Jewish	lifelong Democrat
168	7	6	3	8	7	4	0.25, 0.36	0.71, 0.82	0.25	0.36	0.71	0.82	1.78364	1.48349	0.305	0.765	1.63357	35 to 44	Female	Graduate	Married	Rural	Bisexual	physically-disabled	Caucasian	Jewish	Donald Trump Supporter
172	9	7	3	10	8	4	0.40, 1.00	0.75, 1.89	0.40	1.00	0.75	1.89	1.88595	1.33775	0.7	1.32	1.61185	Over 65	Female	Lower secondary	Married	Urban	Heterosexual	physically-disabled	Asian	Jewish	lifelong Republican
173	7	5	3	8	6	4	0.22, 0.30	0.77, 0.85	0.22	0.30	0.77	0.85	1.7828	1.5027	0.26	0.81	1.64275	Over 65	Male	Lower secondary	Divorced	Urban	Bisexual	able-bodied	Caucasian	Religious	Donald Trump Supporter
174	9	4	3	10	5	4	0.27, 1.00	0.75, 1.89	0.27	1.00	0.75	1.89	1.8558	1.35904	0.635	1.32	1.60742	55 to 64	Male	Bachelor	Widowed	Urban	Asexual	physically-disabled	Caucasian	Religious	lifelong Republican
175	7	5	3	8	6	4	0.22, 0.30	0.77, 0.85	0.22	0.30	0.77	0.85	1.7828	1.5027	0.26	0.81	1.64275	Over 65	Male	Lower secondary	Married	Rural	Asexual	able-bodied	Hispanic	Christian	lifelong Democrat
176	7	6	3	8	7	4	0.25, 0.36	0.71, 0.82	0.25	0.36	0.71	0.82	1.78364	1.48349	0.305	0.765	1.63357	45 to 54	Female	Bachelor	Never married	Urban	Homosexual	able-bodied	African	Religious	lifelong Republican
178	7	4	3	8	5	4	0.17, 0.26	0.80, 0.89	0.17	0.26	0.80	0.89	1.78383	1.52247	0.215	0.845	1.65315	15 to 24	Female	Short-cycle tertiary	Widowed	Urban	Bisexual	physically-disabled	Caucasian	Religious	Barack Obama Supporter
179	7	0	3	8	1	4	#N/A	#N/A	#N/A	#N/A	#N/A	#N/A	#N/A	#N/A	#N/A	#N/A	#N/A	15 to 24	Male	Graduate	Widowed	Rural	Heterosexual	able-bodied	Caucasian	Atheist	Donald Trump Supporter
180	7	5	3	8	6	4	0.22, 0.30	0.77, 0.85	0.22	0.30	0.77	0.85	1.7828	1.5027	0.26	0.81	1.64275	45 to 54	Male	Graduate	Widowed	Rural	Bisexual	physically-disabled	Asian	Christian	lifelong Democrat
181	7	4	3	8	5	4	0.17, 0.26	0.80, 0.89	0.17	0.26	0.80	0.89	1.78383	1.52247	0.215	0.845	1.65315	45 to 54	Male	Below lower secondary	Divorced	Rural	Heterosexual	able-bodied	Hispanic	Christian	Barack Obama Supporter
183	9	6	3	10	7	4	0.34, 1.00	0.75, 1.89	0.34	1.00	0.75	1.89	1.87129	1.34745	0.67	1.32	1.60937	35 to 44	Male	Lower secondary	Married	Urban	Homosexual	able-bodied	African	Christian	lifelong Democrat
184	7	5	3	8	6	4	0.22, 0.30	0.77, 0.85	0.22	0.30	0.77	0.85	1.7828	1.5027	0.26	0.81	1.64275	55 to 64	Female	Upper secondary	Married	Rural	Bisexual	physically-disabled	Caucasian	Christian	lifelong Republican
185	8	3	3	9	4	4	0.18, 0.26	0.90, 0.98	0.18	0.26	0.90	0.98	1.78363	1.52025	0.22	0.94	1.65194	Over 65	Female	Lower secondary	Never married	Urban	Heterosexual	physically-disabled	African	Atheist	lifelong Republican
186	9	6	3	10	7	4	0.34, 1.00	0.75, 1.89	0.34	1.00	0.75	1.89	1.87129	1.34745	0.67	1.32	1.60937	15 to 24	Female	Lower secondary	Widowed	Rural	Heterosexual	able-bodied	Asian	Atheist	Donald Trump Supporter
187	7	4	3	8	5	4	0.17, 0.26	0.80, 0.89	0.17	0.26	0.80	0.89	1.78383	1.52247	0.215	0.845	1.65315	35 to 44	Male	Below lower secondary	Married	Urban	Homosexual	physically-disabled	African	Christian	lifelong Republican
188	8	7	3	9	8	4	0.36, 0.44	0.71, 0.80	0.36	0.44	0.71	0.80	1.79195	1.44476	0.4	0.755	1.61836	35 to 44	Male	Bachelor	Married	Urban	Bisexual	physically-disabled	Asian	Religious	lifelong Democrat
189	9	7	3	10	8	4	0.40, 1.00	0.75, 1.89	0.40	1.00	0.75	1.89	1.88595	1.33775	0.7	1.32	1.61185	15 to 24	Female	Bachelor	Widowed	Rural	Bisexual	able-bodied	African	Jewish	Barack Obama Supporter
190	8	7	3	9	8	4	0.36, 0.44	0.71, 0.80	0.36	0.44	0.71	0.80	1.79195	1.44476	0.4	0.755	1.61836	45 to 54	Male	Graduate	Divorced	Urban	Homosexual	physically-disabled	Asian	Christian	lifelong Republican
191	7	4	3	8	5	4	0.17, 0.26	0.80, 0.89	0.17	0.26	0.80	0.89	1.78383	1.52247	0.215	0.845	1.65315	55 to 64	Male	Upper secondary	Widowed	Urban	Bisexual	physically-disabled	African	Religious	Donald Trump Supporter
193	9	9	3	10	10	4	0.49, 1.00	0.65, 1.89	0.49	1.00	0.65	1.89	1.91043	1.32359	0.745	1.27	1.61701	35 to 44	Female	Short-cycle tertiary	Never married	Urban	Heterosexual	able-bodied	African	Christian	lifelong Democrat
194	7	4	3	8	5	4	0.17, 0.26	0.80, 0.89	0.17	0.26	0.80	0.89	1.78383	1.52247	0.215	0.845	1.65315	55 to 64	Male	Short-cycle tertiary	Married	Urban	Bisexual	physically-disabled	African	Christian	Donald Trump Supporter
195	7	5	3	8	6	4	0.22, 0.30	0.77, 0.85	0.22	0.30	0.77	0.85	1.7828	1.5027	0.26	0.81	1.64275	Over 65	Male	Lower secondary	Never married	Urban	Bisexual	able-bodied	Hispanic	Atheist	lifelong Republican
196	7	4	3	8	5	4	0.17, 0.26	0.80, 0.89	0.17	0.26	0.80	0.89	1.78383	1.52247	0.215	0.845	1.65315	55 to 64	Female	Lower secondary	Never married	Urban	Homosexual	physically-disabled	Caucasian	Jewish	Donald Trump Supporter
199	7	5	3	8	6	4	0.22, 0.30	0.77, 0.85	0.22	0.30	0.77	0.85	1.7828	1.5027	0.26	0.81	1.64275	Over 65	Male	Below lower secondary	Widowed	Urban	Heterosexual	able-bodied	Hispanic	Atheist	lifelong Democrat
200	7	5	3	8	6	4	0.22, 0.30	0.77, 0.85	0.22	0.30	0.77	0.85	1.7828	1.5027	0.26	0.81	1.64275	55 to 64	Male	Lower secondary	Widowed	Urban	Bisexual	physically-disabled	African	Atheist	lifelong Democrat
201	7	6	3	8	7	4	0.25, 0.36	0.71, 0.82	0.25	0.36	0.71	0.82	1.78364	1.48349	0.305	0.765	1.63357	45 to 54	Female	Lower secondary	Divorced	Rural	Bisexual	physically-disabled	Asian	Atheist	lifelong Democrat
202	7	1	3	8	2	4	-0.01, 0.12	0.94, 1.05	-0.0	0.12	0.94	1.05	1.80077	1.59502	0.06	0.995	1.69789	25 to 34	Male	Below lower secondary	Widowed	Urban	Asexual	able-bodied	Asian	Atheist	lifelong Democrat
204	7	4	3	8	5	4	0.17, 0.26	0.80, 0.89	0.17	0.26	0.80	0.89	1.78383	1.52247	0.215	0.845	1.65315	25 to 34	Female	Bachelor	Married	Rural	Heterosexual	able-bodied	Caucasian	Jewish	Barack Obama Supporter
205	10	8	3	11	9	4	0.50, 1.00	0.75, 1.89	0.50	1.00	0.75	1.89	1.91334	1.32205	0.75	1.32	1.61769	Over 65	Male	Bachelor	Widowed	Urban	Asexual	able-bodied	Caucasian	Christian	Donald Trump Supporter
207	7	4	3	8	5	4	0.17, 0.26	0.80, 0.89	0.17	0.26	0.80	0.89	1.78383	1.52247	0.215	0.845	1.65315	15 to 24	Female	Lower secondary	Widowed	Urban	Asexual	able-bodied	African	Atheist	Barack Obama Supporter
209	9	5	3	10	6	4	0.31, 0.40	0.87, 0.96	0.31	0.40	0.87	0.96	1.78688	1.4628	0.355	0.915	1.62484	15 to 24	Male	Graduate	Widowed	Urban	Homosexual	able-bodied	Caucasian	Atheist	lifelong Republican
211	9	5	3	10	6	4	0.31, 0.40	0.87, 0.96	0.31	0.40	0.87	0.96	1.78688	1.4628	0.355	0.915	1.62484	55 to 64	Male	Short-cycle tertiary	Divorced	Rural	Bisexual	physically-disabled	Asian	Religious	lifelong Democrat
212	9	7	3	10	8	4	0.40, 1.00	0.75, 1.89	0.40	1.00	0.75	1.89	1.88595	1.33775	0.7	1.32	1.61185	55 to 64	Female	Graduate	Divorced	Urban	Bisexual	able-bodied	Caucasian	Religious	lifelong Democrat
214	8	4	3	9	5	4	0.23, 0.30	0.86, 0.93	0.23	0.30	0.86	0.93	1.7828	1.50054	0.265	0.895	1.64167	35 to 44	Female	Graduate	Divorced	Rural	Bisexual	able-bodied	Asian	Christian	Donald Trump Supporter
216	6	1	3	7	2	4	-0.07, 0.06	0.88, 0.99	-0.0	0.06	0.88	0.99	1.80629	1.60987	0.03	0.935	1.70808	45 to 54	Female	Short-cycle tertiary	Married	Urban	Heterosexual	able-bodied	Caucasian	Christian	lifelong Republican
218	7	5	3	8	6	4	0.22, 0.30	0.77, 0.85	0.22	0.30	0.77	0.85	1.7828	1.5027	0.26	0.81	1.64275	Over 65	Male	Short-cycle tertiary	Divorced	Urban	Heterosexual	able-bodied	Hispanic	Christian	lifelong Democrat
219	7	4	3	8	5	4	0.17, 0.26	0.80, 0.89	0.17	0.26	0.80	0.89	1.78383	1.52247	0.215	0.845	1.65315	15 to 24	Female	Lower secondary	Never married	Urban	Asexual	physically-disabled	Asian	Atheist	Donald Trump Supporter
220	8	6	3	9	7	4	0.31, 0.39	0.76, 0.86	0.31	0.39	0.76	0.86	1.78644	1.46484	0.35	0.81	1.62564	55 to 64	Male	Upper secondary	Divorced	Urban	Bisexual	able-bodied	Caucasian	Atheist	Barack Obama Supporter
221	8	4	3	9	5	4	0.23, 0.30	0.86, 0.93	0.23	0.30	0.86	0.93	1.7828	1.50054	0.265	0.895	1.64167	45 to 54	Female	Graduate	Married	Rural	Bisexual	physically-disabled	African	Atheist	lifelong Democrat
223	8	4	3	9	5	4	0.23, 0.30	0.86, 0.93	0.23	0.30	0.86	0.93	1.7828	1.50054	0.265	0.895	1.64167	35 to 44	Male	Below lower secondary	Widowed	Rural	Homosexual	able-bodied	Asian	Christian	Donald Trump Supporter
224	9	6	3	10	7	4	0.34, 1.00	0.75, 1.89	0.34	1.00	0.75	1.89	1.87129	1.34745	0.67	1.32	1.60937	25 to 34	Female	Upper secondary	Divorced	Urban	Asexual	able-bodied	Caucasian	Religious	Barack Obama Supporter
226	9	6	3	10	7	4	0.34, 1.00	0.75, 1.89	0.34	1.00	0.75	1.89	1.87129	1.34745	0.67	1.32	1.60937	45 to 54	Male	Short-cycle tertiary	Married	Urban	Homosexual	physically-disabled	Caucasian	Christian	lifelong Democrat
228	8	4	3	9	5	4	0.23, 0.30	0.86, 0.93	0.23	0.30	0.86	0.93	1.7828	1.50054	0.265	0.895	1.64167	45 to 54	Female	Short-cycle tertiary	Widowed	Rural	Homosexual	physically-disabled	African	Religious	Donald Trump Supporter
230	6	2	3	7	3	4	-0.00, 0.12	0.83, 0.93	-0.0	0.12	0.83	0.93	1.80077	1.59502	0.06	0.88	1.69789	25 to 34	Male	Lower secondary	Widowed	Urban	Heterosexual	physically-disabled	African	Religious	Donald Trump Supporter
232	7	4	3	8	5	4	0.17, 0.26	0.80, 0.89	0.17	0.26	0.80	0.89	1.78383	1.52247	0.215	0.845	1.65315	15 to 24	Female	Below lower secondary	Divorced	Rural	Asexual	able-bodied	Caucasian	Atheist	lifelong Democrat
233	7	4	3	8	5	4	0.17, 0.26	0.80, 0.89	0.17	0.26	0.80	0.89	1.78383	1.52247	0.215	0.845	1.65315	35 to 44	Female	Short-cycle tertiary	Married	Urban	Asexual	physically-disabled	African	Christian	Donald Trump Supporter
234	7	5	3	8	6	4	0.22, 0.30	0.77, 0.85	0.22	0.30	0.77	0.85	1.7828	1.5027	0.26	0.81	1.64275	Over 65	Male	Below lower secondary	Widowed	Urban	Asexual	physically-disabled	Asian	Atheist	Barack Obama Supporter
235	7	4	3	8	5	4	0.17, 0.26	0.80, 0.89	0.17	0.26	0.80	0.89	1.78383	1.52247	0.215	0.845	1.65315	25 to 34	Male	Upper secondary	Married	Urban	Asexual	able-bodied	African	Jewish	lifelong Democrat
237	9	6	3	10	7	4	0.34, 1.00	0.75, 1.89	0.34	1.00	0.75	1.89	1.87129	1.34745	0.67	1.32	1.60937	15 to 24	Female	Short-cycle tertiary	Married	Urban	Homosexual	able-bodied	Hispanic	Jewish	lifelong Republican
239	8	5	3	9	6	4	0.27, 0.34	0.82, 0.89	0.27	0.34	0.82	0.89	1.78364	1.48349	0.305	0.855	1.63357	Over 65	Female	Lower secondary	Divorced	Urban	Bisexual	able-bodied	Asian	Christian	lifelong Republican
240	7	4	3	8	5	4	0.17, 0.26	0.80, 0.89	0.17	0.26	0.80	0.89	1.78383	1.52247	0.215	0.845	1.65315	55 to 64	Female	Graduate	Widowed	Urban	Asexual	physically-disabled	Hispanic	Religious	Barack Obama Supporter
241	7	5	3	8	6	4	0.22, 0.30	0.77, 0.85	0.22	0.30	0.77	0.85	1.7828	1.5027	0.26	0.81	1.64275	45 to 54	Female	Short-cycle tertiary	Widowed	Rural	Homosexual	able-bodied	Asian	Jewish	lifelong Democrat
242	7	0	3	8	1	4	#N/A	#N/A	#N/A	#N/A	#N/A	#N/A	#N/A	#N/A	#N/A	#N/A	#N/A	25 to 34	Male	Upper secondary	Married	Rural	Bisexual	physically-disabled	Hispanic	Christian	lifelong Democrat
243	8	7	3	9	8	4	0.36, 0.44	0.71, 0.80	0.36	0.44	0.71	0.80	1.79195	1.44476	0.4	0.755	1.61836	35 to 44	Male	Below lower secondary	Married	Rural	Asexual	able-bodied	African	Jewish	lifelong Democrat
245	9	5	3	10	6	4	0.31, 0.40	0.87, 0.96	0.31	0.40	0.87	0.96	1.78688	1.4628	0.355	0.915	1.62484	Over 65	Male	Lower secondary	Widowed	Rural	Bisexual	physically-disabled	Asian	Religious	Barack Obama Supporter
246	8	7	3	9	8	4	0.36, 0.44	0.71, 0.80	0.36	0.44	0.71	0.80	1.79195	1.44476	0.4	0.755	1.61836	25 to 34	Female	Graduate	Widowed	Urban	Homosexual	physically-disabled	African	Religious	lifelong Republican
247	7	6	3	8	7	4	0.25, 0.36	0.71, 0.82	0.25	0.36	0.71	0.82	1.78364	1.48349	0.305	0.765	1.63357	45 to 54	Female	Lower secondary	Never married	Urban	Heterosexual	able-bodied	Asian	Jewish	lifelong Republican
248	7	4	3	8	5	4	0.17, 0.26	0.80, 0.89	0.17	0.26	0.80	0.89	1.78383	1.52247	0.215	0.845	1.65315	55 to 64	Male	Upper secondary	Divorced	Rural	Heterosexual	physically-disabled	Asian	Christian	lifelong Republican
249	9	6	3	10	7	4	0.34, 1.00	0.75, 1.89	0.34	1.00	0.75	1.89	1.87129	1.34745	0.67	1.32	1.60937	55 to 64	Female	Lower secondary	Married	Urban	Heterosexual	able-bodied	Hispanic	Christian	Donald Trump Supporter
250	7	5	3	8	6	4	0.22, 0.30	0.77, 0.85	0.22	0.30	0.77	0.85	1.7828	1.5027	0.26	0.81	1.64275	35 to 44	Female	Lower secondary	Widowed	Urban	Bisexual	physically-disabled	Asian	Jewish	lifelong Democrat
251	7	3	3	8	4	4	0.12, 0.22	0.84, 0.94	0.12	0.22	0.84	0.94	1.78667	1.54282	0.17	0.89	1.66474	25 to 34	Female	Below lower secondary	Widowed	Urban	Homosexual	able-bodied	Caucasian	Christian	lifelong Democrat
252	7	5	3	8	6	4	0.22, 0.30	0.77, 0.85	0.22	0.30	0.77	0.85	1.7828	1.5027	0.26	0.81	1.64275	25 to 34	Female	Below lower secondary	Never married	Urban	Heterosexual	able-bodied	African	Jewish	lifelong Republican
253	7	4	3	8	5	4	0.17, 0.26	0.80, 0.89	0.17	0.26	0.80	0.89	1.78383	1.52247	0.215	0.845	1.65315	15 to 24	Female	Upper secondary	Married	Rural	Asexual	able-bodied	Hispanic	Christian	lifelong Democrat
255	7	4	3	8	5	4	0.17, 0.26	0.80, 0.89	0.17	0.26	0.80	0.89	1.78383	1.52247	0.215	0.845	1.65315	25 to 34	Male	Short-cycle tertiary	Never married	Urban	Heterosexual	able-bodied	Caucasian	Atheist	Donald Trump Supporter
257	7	5	3	8	6	4	0.22, 0.30	0.77, 0.85	0.22	0.30	0.77	0.85	1.7828	1.5027	0.26	0.81	1.64275	25 to 34	Female	Bachelor	Married	Urban	Bisexual	physically-disabled	African	Atheist	Barack Obama Supporter
259	9	7	3	10	8	4	0.40, 1.00	0.75, 1.89	0.40	1.00	0.75	1.89	1.88595	1.33775	0.7	1.32	1.61185	25 to 34	Male	Below lower secondary	Never married	Rural	Asexual	physically-disabled	Asian	Atheist	lifelong Republican
261	7	5	3	8	6	4	0.22, 0.30	0.77, 0.85	0.22	0.30	0.77	0.85	1.7828	1.5027	0.26	0.81	1.64275	25 to 34	Male	Short-cycle tertiary	Divorced	Urban	Heterosexual	able-bodied	African	Atheist	Barack Obama Supporter
262	7	0	3	8	1	4	#N/A	#N/A	#N/A	#N/A	#N/A	#N/A	#N/A	#N/A	#N/A	#N/A	#N/A	15 to 24	Male	Short-cycle tertiary	Married	Rural	Homosexual	able-bodied	Caucasian	Atheist	lifelong Democrat
266	6	3	3	7	4	4	0.06, 0.16	0.78, 0.88	0.06	0.16	0.78	0.88	1.79314	1.57085	0.11	0.83	1.68199	35 to 44	Female	Below lower secondary	Married	Rural	Homosexual	able-bodied	Asian	Christian	Barack Obama Supporter
267	7	5	3	8	6	4	0.22, 0.30	0.77, 0.85	0.22	0.30	0.77	0.85	1.7828	1.5027	0.26	0.81	1.64275	25 to 34	Female	Lower secondary	Widowed	Urban	Asexual	physically-disabled	Hispanic	Religious	Barack Obama Supporter
268	7	6	3	8	7	4	0.25, 0.36	0.71, 0.82	0.25	0.36	0.71	0.82	1.78364	1.48349	0.305	0.765	1.63357	35 to 44	Male	Upper secondary	Divorced	Rural	Asexual	physically-disabled	Hispanic	Religious	lifelong Democrat
269	7	5	3	8	6	4	0.22, 0.30	0.77, 0.85	0.22	0.30	0.77	0.85	1.7828	1.5027	0.26	0.81	1.64275	25 to 34	Male	Bachelor	Married	Rural	Bisexual	able-bodied	African	Religious	lifelong Democrat
270	7	3	3	8	4	4	0.12, 0.22	0.84, 0.94	0.12	0.22	0.84	0.94	1.78667	1.54282	0.17	0.89	1.66474	55 to 64	Male	Bachelor	Widowed	Urban	Bisexual	physically-disabled	African	Religious	lifelong Democrat
272	8	4	3	9	5	4	0.23, 0.30	0.86, 0.93	0.23	0.30	0.86	0.93	1.7828	1.50054	0.265	0.895	1.64167	45 to 54	Male	Graduate	Divorced	Urban	Asexual	physically-disabled	Hispanic	Religious	Barack Obama Supporter
273	7	5	3	8	6	4	0.22, 0.30	0.77, 0.85	0.22	0.30	0.77	0.85	1.7828	1.5027	0.26	0.81	1.64275	35 to 44	Male	Below lower secondary	Married	Urban	Asexual	able-bodied	Asian	Jewish	Barack Obama Supporter
274	9	7	3	10	8	4	0.40, 1.00	0.75, 1.89	0.40	1.00	0.75	1.89	1.88595	1.33775	0.7	1.32	1.61185	Over 65	Female	Short-cycle tertiary	Married	Urban	Asexual	able-bodied	Caucasian	Atheist	lifelong Republican
276	7	4	3	8	5	4	0.17, 0.26	0.80, 0.89	0.17	0.26	0.80	0.89	1.78383	1.52247	0.215	0.845	1.65315	45 to 54	Male	Short-cycle tertiary	Widowed	Urban	Asexual	able-bodied	African	Atheist	lifelong Democrat
277	6	0	3	7	1	4	#N/A	#N/A	#N/A	#N/A	#N/A	#N/A	#N/A	#N/A	#N/A	#N/A	#N/A	55 to 64	Female	Graduate	Widowed	Urban	Heterosexual	physically-disabled	African	Atheist	Donald Trump Supporter
278	7	4	3	8	5	4	0.17, 0.26	0.80, 0.89	0.17	0.26	0.80	0.89	1.78383	1.52247	0.215	0.845	1.65315	15 to 24	Female	Upper secondary	Never married	Rural	Homosexual	able-bodied	Hispanic	Jewish	Donald Trump Supporter
279	8	7	3	9	8	4	0.36, 0.44	0.71, 0.80	0.36	0.44	0.71	0.80	1.79195	1.44476	0.4	0.755	1.61836	15 to 24	Male	Upper secondary	Widowed	Urban	Heterosexual	able-bodied	Caucasian	Religious	Barack Obama Supporter
280	7	4	3	8	5	4	0.17, 0.26	0.80, 0.89	0.17	0.26	0.80	0.89	1.78383	1.52247	0.215	0.845	1.65315	45 to 54	Female	Graduate	Divorced	Urban	Homosexual	able-bodied	African	Christian	Barack Obama Supporter
281	7	4	3	8	5	4	0.17, 0.26	0.80, 0.89	0.17	0.26	0.80	0.89	1.78383	1.52247	0.215	0.845	1.65315	15 to 24	Male	Bachelor	Divorced	Rural	Asexual	physically-disabled	Asian	Jewish	Barack Obama Supporter
283	7	3	3	8	4	4	0.12, 0.22	0.84, 0.94	0.12	0.22	0.84	0.94	1.78667	1.54282	0.17	0.89	1.66474	Over 65	Male	Graduate	Widowed	Urban	Homosexual	physically-disabled	African	Atheist	lifelong Republican
284	7	5	3	8	6	4	0.22, 0.30	0.77, 0.85	0.22	0.30	0.77	0.85	1.7828	1.5027	0.26	0.81	1.64275	55 to 64	Male	Graduate	Divorced	Rural	Bisexual	able-bodied	African	Atheist	Barack Obama Supporter
286	8	7	3	9	8	4	0.36, 0.44	0.71, 0.80	0.36	0.44	0.71	0.80	1.79195	1.44476	0.4	0.755	1.61836	35 to 44	Male	Lower secondary	Widowed	Urban	Bisexual	physically-disabled	Caucasian	Jewish	Barack Obama Supporter
288	7	4	3	8	5	4	0.17, 0.26	0.80, 0.89	0.17	0.26	0.80	0.89	1.78383	1.52247	0.215	0.845	1.65315	45 to 54	Male	Bachelor	Widowed	Urban	Heterosexual	physically-disabled	Caucasian	Religious	lifelong Republican
291	9	5	3	10	6	4	0.31, 0.40	0.87, 0.96	0.31	0.40	0.87	0.96	1.78688	1.4628	0.355	0.915	1.62484	45 to 54	Male	Bachelor	Never married	Urban	Heterosexual	able-bodied	African	Christian	Barack Obama Supporter
292	7	0	3	8	1	4	#N/A	#N/A	#N/A	#N/A	#N/A	#N/A	#N/A	#N/A	#N/A	#N/A	#N/A	25 to 34	Male	Below lower secondary	Never married	Urban	Bisexual	physically-disabled	Caucasian	Jewish	Barack Obama Supporter
293	7	10	3	8	11	4	0.46, 0.55	0.51, 0.60	0.46	0.55	0.51	0.60	1.81233	1.40473	0.505	0.555	1.60853	15 to 24	Female	Below lower secondary	Married	Rural	Heterosexual	physically-disabled	Hispanic	Christian	lifelong Democrat
294	6	2	3	7	3	4	-0.00, 0.12	0.83, 0.93	-0.0	0.12	0.83	0.93	1.80077	1.59502	0.06	0.88	1.69789	55 to 64	Female	Short-cycle tertiary	Never married	Urban	Homosexual	able-bodied	Asian	Jewish	lifelong Democrat
296	7	4	3	8	5	4	0.17, 0.26	0.80, 0.89	0.17	0.26	0.80	0.89	1.78383	1.52247	0.215	0.845	1.65315	25 to 34	Female	Lower secondary	Divorced	Urban	Asexual	physically-disabled	Hispanic	Jewish	lifelong Republican
297	7	6	3	8	7	4	0.25, 0.36	0.71, 0.82	0.25	0.36	0.71	0.82	1.78364	1.48349	0.305	0.765	1.63357	Over 65	Male	Graduate	Never married	Rural	Homosexual	able-bodied	Hispanic	Religious	Barack Obama Supporter
298	8	7	3	9	8	4	0.36, 0.44	0.71, 0.80	0.36	0.44	0.71	0.80	1.79195	1.44476	0.4	0.755	1.61836	Over 65	Male	Bachelor	Divorced	Rural	Bisexual	able-bodied	Asian	Christian	Barack Obama Supporter
299	7	4	3	8	5	4	0.17, 0.26	0.80, 0.89	0.17	0.26	0.80	0.89	1.78383	1.52247	0.215	0.845	1.65315	35 to 44	Male	Below lower secondary	Never married	Urban	Heterosexual	able-bodied	Asian	Christian	Donald Trump Supporter
300	7	4	3	8	5	4	0.17, 0.26	0.80, 0.89	0.17	0.26	0.80	0.89	1.78383	1.52247	0.215	0.845	1.65315	25 to 34	Female	Upper secondary	Never married	Urban	Asexual	physically-disabled	Hispanic	Christian	lifelong Democrat
102	7	3	4	8	4	5	0.12, 0.22	0.84, 0.94	0.12	0.22	0.84	0.94	3.62272	2.31849	0.17	0.89	2.9706	15 to 24	Female	Bachelor	Never married	Rural	Homosexual	able-bodied	Hispanic	Christian	Barack Obama Supporter
289	7	3	4	8	4	5	0.12, 0.22	0.84, 0.94	0.12	0.22	0.84	0.94	3.62272	2.31849	0.17	0.89	2.9706	Over 65	Male	Lower secondary	Married	Urban	Heterosexual	able-bodied	Asian	Christian	Donald Trump Supporter

## Sheet: minority-claude
	S1	S2	S3	S1-corrected	S2-corrected	S3-corrected	sigma range	alpha range	sigma lower bound	sigma upper bound	alpha lower bound	alpha upper bound	lambda upper bound	lambda lower bound	sigma	alpha	lambda	Age	Gender	Education	Marital Status	Location	Sexual Orientation	Disability	Race	Religion	Political Affiliation
	7	9	2	8	10	3	0.41, 0.50	0.56, 0.66	0.41	0.50	0.56	0.66	1.80109	1.42343	0.455	0.61	1.61226	55 to 64	Female	Below lower secondary	Never married	Urban	Bisexual	able-bodied	Hispanic	Religious	Barack Obama Supporter
	7	10	2	8	11	3	0.46, 0.55	0.51, 0.60	0.46	0.55	0.51	0.60	1.81233	1.40473	0.505	0.555	1.60853	Over 65	Female	Graduate	Never married	Urban	Heterosexual	physically-disabled	African	Atheist	Barack Obama Supporter
	7	10	2	8	11	3	0.46, 0.55	0.51, 0.60	0.46	0.55	0.51	0.60	1.81233	1.40473	0.505	0.555	1.60853	45 to 54	Male	Lower secondary	Divorced	Urban	Homosexual	physically-disabled	Asian	Jewish	Barack Obama Supporter
	7	9	2	8	10	3	0.41, 0.50	0.56, 0.66	0.41	0.50	0.56	0.66	1.80109	1.42343	0.455	0.61	1.61226	15 to 24	Female	Graduate	Married	Urban	Asexual	able-bodied	African	Jewish	lifelong Republican
	6	7	2	7	8	3	0.26, 0.36	0.60, 0.70	0.26	0.36	0.60	0.70	1.78385	1.48139	0.31	0.65	1.63262	45 to 54	Male	Graduate	Never married	Rural	Heterosexual	able-bodied	Hispanic	Atheist	Donald Trump Supporter
	6	9	2	7	10	3	0.36, 0.45	0.51, 0.61	0.36	0.45	0.51	0.61	1.79265	1.44279	0.405	0.56	1.61772	35 to 44	Male	Below lower secondary	Divorced	Urban	Asexual	able-bodied	Hispanic	Jewish	Donald Trump Supporter
	6	9	2	7	10	3	0.36, 0.45	0.51, 0.61	0.36	0.45	0.51	0.61	1.79265	1.44279	0.405	0.56	1.61772	35 to 44	Female	Lower secondary	Married	Rural	Bisexual	able-bodied	Asian	Religious	Barack Obama Supporter
	6	7	2	7	8	3	0.26, 0.36	0.60, 0.70	0.26	0.36	0.60	0.70	1.78385	1.48139	0.31	0.65	1.63262	35 to 44	Female	Below lower secondary	Married	Urban	Homosexual	physically-disabled	African	Jewish	Barack Obama Supporter
	5	7	2	6	8	3	0.21, 0.31	0.55, 0.64	0.21	0.31	0.55	0.64	1.7828	1.5027	0.26	0.595	1.64275	15 to 24	Male	Bachelor	Never married	Rural	Homosexual	able-bodied	Asian	Religious	lifelong Republican
	6	7	2	7	8	3	0.26, 0.36	0.60, 0.70	0.26	0.36	0.60	0.70	1.78385	1.48139	0.31	0.65	1.63262	35 to 44	Male	Graduate	Widowed	Urban	Asexual	physically-disabled	Hispanic	Jewish	lifelong Republican
	7	9	2	8	10	3	0.41, 0.50	0.56, 0.66	0.41	0.50	0.56	0.66	1.80109	1.42343	0.455	0.61	1.61226	35 to 44	Male	Bachelor	Divorced	Rural	Asexual	able-bodied	Caucasian	Jewish	Donald Trump Supporter
	6	9	2	7	10	3	0.36, 0.45	0.51, 0.61	0.36	0.45	0.51	0.61	1.79265	1.44279	0.405	0.56	1.61772	35 to 44	Male	Bachelor	Divorced	Rural	Asexual	physically-disabled	Caucasian	Religious	Donald Trump Supporter
	6	9	2	7	10	3	0.36, 0.45	0.51, 0.61	0.36	0.45	0.51	0.61	1.79265	1.44279	0.405	0.56	1.61772	55 to 64	Male	Lower secondary	Divorced	Rural	Heterosexual	physically-disabled	African	Atheist	lifelong Republican
	4	7	2	5	8	3	0.15, 0.26	0.49, 0.59	0.15	0.26	0.49	0.59	1.78431	1.52694	0.205	0.54	1.65563	55 to 64	Female	Below lower secondary	Widowed	Rural	Heterosexual	physically-disabled	African	Jewish	Barack Obama Supporter
	6	10	2	7	11	3	0.41, 0.51	0.45, 0.55	0.41	0.51	0.45	0.55	1.80208	1.42153	0.46	0.5	1.61181	25 to 34	Female	Upper secondary	Never married	Rural	Asexual	physically-disabled	Hispanic	Atheist	lifelong Republican
	7	9	2	8	10	3	0.41, 0.50	0.56, 0.66	0.41	0.50	0.56	0.66	1.80109	1.42343	0.455	0.61	1.61226	35 to 44	Female	Upper secondary	Divorced	Rural	Homosexual	able-bodied	Hispanic	Atheist	lifelong Republican
	6	7	2	7	8	3	0.26, 0.36	0.60, 0.70	0.26	0.36	0.60	0.70	1.78385	1.48139	0.31	0.65	1.63262	45 to 54	Female	Below lower secondary	Never married	Rural	Bisexual	physically-disabled	Caucasian	Jewish	lifelong Republican
	7	9	2	8	10	3	0.41, 0.50	0.56, 0.66	0.41	0.50	0.56	0.66	1.80109	1.42343	0.455	0.61	1.61226	45 to 54	Male	Bachelor	Never married	Urban	Asexual	physically-disabled	Hispanic	Christian	Barack Obama Supporter
	5	7	2	6	8	3	0.21, 0.31	0.55, 0.64	0.21	0.31	0.55	0.64	1.7828	1.5027	0.26	0.595	1.64275	15 to 24	Male	Lower secondary	Widowed	Rural	Heterosexual	able-bodied	Hispanic	Religious	lifelong Democrat
	5	10	2	6	11	3	0.37, 0.46	0.40, 0.50	0.37	0.46	0.40	0.50	1.79412	1.43886	0.415	0.45	1.61649	Over 65	Male	Lower secondary	Married	Rural	Asexual	able-bodied	Caucasian	Religious	lifelong Republican
	7	10	2	8	11	3	0.46, 0.55	0.51, 0.60	0.46	0.55	0.51	0.60	1.81233	1.40473	0.505	0.555	1.60853	25 to 34	Female	Below lower secondary	Divorced	Rural	Asexual	able-bodied	Hispanic	Jewish	Donald Trump Supporter
	4	7	2	5	8	3	0.15, 0.26	0.49, 0.59	0.15	0.26	0.49	0.59	1.78431	1.52694	0.205	0.54	1.65563	55 to 64	Male	Lower secondary	Widowed	Rural	Bisexual	physically-disabled	Asian	Religious	lifelong Democrat
	5	9	2	6	10	3	0.31, 0.41	0.45, 0.55	0.31	0.41	0.45	0.55	1.78734	1.46077	0.36	0.5	1.62405	15 to 24	Female	Lower secondary	Never married	Urban	Heterosexual	physically-disabled	African	Religious	Barack Obama Supporter
	5	10	2	6	11	3	0.37, 0.46	0.40, 0.50	0.37	0.46	0.40	0.50	1.79412	1.43886	0.415	0.45	1.61649	Over 65	Female	Lower secondary	Never married	Rural	Bisexual	physically-disabled	Hispanic	Atheist	lifelong Republican
	6	9	2	7	10	3	0.36, 0.45	0.51, 0.61	0.36	0.45	0.51	0.61	1.79265	1.44279	0.405	0.56	1.61772	15 to 24	Female	Graduate	Married	Urban	Bisexual	physically-disabled	Caucasian	Christian	Barack Obama Supporter
	7	9	2	8	10	3	0.41, 0.50	0.56, 0.66	0.41	0.50	0.56	0.66	1.80109	1.42343	0.455	0.61	1.61226	Over 65	Male	Graduate	Never married	Rural	Homosexual	able-bodied	African	Jewish	lifelong Democrat
	5	9	2	6	10	3	0.31, 0.41	0.45, 0.55	0.31	0.41	0.45	0.55	1.78734	1.46077	0.36	0.5	1.62405	55 to 64	Female	Below lower secondary	Married	Urban	Homosexual	physically-disabled	African	Religious	lifelong Republican
	7	6	2	8	7	3	0.25, 0.36	0.71, 0.82	0.25	0.36	0.71	0.82	1.78364	1.48349	0.305	0.765	1.63357	25 to 34	Male	Short-cycle tertiary	Married	Rural	Homosexual	able-bodied	Caucasian	Jewish	lifelong Republican
	6	7	2	7	8	3	0.26, 0.36	0.60, 0.70	0.26	0.36	0.60	0.70	1.78385	1.48139	0.31	0.65	1.63262	55 to 64	Female	Below lower secondary	Widowed	Rural	Homosexual	physically-disabled	Caucasian	Atheist	lifelong Republican
	4	7	2	5	8	3	0.15, 0.26	0.49, 0.59	0.15	0.26	0.49	0.59	1.78431	1.52694	0.205	0.54	1.65563	Over 65	Female	Short-cycle tertiary	Married	Rural	Bisexual	able-bodied	Asian	Christian	Donald Trump Supporter
	6	7	2	7	8	3	0.26, 0.36	0.60, 0.70	0.26	0.36	0.60	0.70	1.78385	1.48139	0.31	0.65	1.63262	55 to 64	Male	Short-cycle tertiary	Divorced	Rural	Homosexual	able-bodied	Caucasian	Jewish	lifelong Democrat
	6	11	2	7	12	3	0.47, 0.56	0.39, 0.50	0.47	0.56	0.39	0.50	1.81493	1.40106	0.515	0.445	1.608	55 to 64	Male	Bachelor	Divorced	Urban	Bisexual	physically-disabled	Asian	Christian	lifelong Republican
	6	9	2	7	10	3	0.36, 0.45	0.51, 0.61	0.36	0.45	0.51	0.61	1.79265	1.44279	0.405	0.56	1.61772	55 to 64	Female	Lower secondary	Divorced	Rural	Bisexual	able-bodied	African	Jewish	Donald Trump Supporter
	6	9	2	7	10	3	0.36, 0.45	0.51, 0.61	0.36	0.45	0.51	0.61	1.79265	1.44279	0.405	0.56	1.61772	55 to 64	Male	Below lower secondary	Divorced	Rural	Asexual	physically-disabled	African	Christian	lifelong Republican
	6	7	2	7	8	3	0.26, 0.36	0.60, 0.70	0.26	0.36	0.60	0.70	1.78385	1.48139	0.31	0.65	1.63262	25 to 34	Male	Bachelor	Married	Urban	Heterosexual	physically-disabled	African	Religious	Donald Trump Supporter
	6	9	2	7	10	3	0.36, 0.45	0.51, 0.61	0.36	0.45	0.51	0.61	1.79265	1.44279	0.405	0.56	1.61772	55 to 64	Female	Lower secondary	Never married	Urban	Heterosexual	physically-disabled	African	Atheist	Barack Obama Supporter
	7	9	2	8	10	3	0.41, 0.50	0.56, 0.66	0.41	0.50	0.56	0.66	1.80109	1.42343	0.455	0.61	1.61226	35 to 44	Male	Upper secondary	Divorced	Urban	Asexual	able-bodied	Asian	Atheist	Donald Trump Supporter
	6	7	2	7	8	3	0.26, 0.36	0.60, 0.70	0.26	0.36	0.60	0.70	1.78385	1.48139	0.31	0.65	1.63262	25 to 34	Female	Upper secondary	Divorced	Urban	Heterosexual	physically-disabled	African	Jewish	lifelong Republican
	6	10	2	7	11	3	0.41, 0.51	0.45, 0.55	0.41	0.51	0.45	0.55	1.80208	1.42153	0.46	0.5	1.61181	55 to 64	Female	Below lower secondary	Never married	Rural	Bisexual	physically-disabled	Asian	Jewish	lifelong Republican
	5	8	2	6	9	3	0.26, 0.35	0.51, 0.59	0.26	0.35	0.51	0.59	1.78364	1.48349	0.305	0.55	1.63357	45 to 54	Female	Below lower secondary	Widowed	Urban	Heterosexual	physically-disabled	African	Religious	lifelong Republican
	6	9	2	7	10	3	0.36, 0.45	0.51, 0.61	0.36	0.45	0.51	0.61	1.79265	1.44279	0.405	0.56	1.61772	15 to 24	Female	Bachelor	Widowed	Urban	Asexual	physically-disabled	Hispanic	Christian	lifelong Republican
	7	9	2	8	10	3	0.41, 0.50	0.56, 0.66	0.41	0.50	0.56	0.66	1.80109	1.42343	0.455	0.61	1.61226	25 to 34	Male	Graduate	Widowed	Rural	Asexual	able-bodied	African	Jewish	lifelong Republican
	5	8	2	6	9	3	0.26, 0.35	0.51, 0.59	0.26	0.35	0.51	0.59	1.78364	1.48349	0.305	0.55	1.63357	55 to 64	Male	Upper secondary	Widowed	Rural	Heterosexual	physically-disabled	African	Atheist	Donald Trump Supporter
	5	7	2	6	8	3	0.21, 0.31	0.55, 0.64	0.21	0.31	0.55	0.64	1.7828	1.5027	0.26	0.595	1.64275	Over 65	Male	Lower secondary	Divorced	Urban	Bisexual	able-bodied	Caucasian	Religious	Donald Trump Supporter
	4	7	2	5	8	3	0.15, 0.26	0.49, 0.59	0.15	0.26	0.49	0.59	1.78431	1.52694	0.205	0.54	1.65563	45 to 54	Male	Below lower secondary	Divorced	Rural	Heterosexual	able-bodied	Hispanic	Christian	Barack Obama Supporter
	6	7	2	7	8	3	0.26, 0.36	0.60, 0.70	0.26	0.36	0.60	0.70	1.78385	1.48139	0.31	0.65	1.63262	35 to 44	Male	Lower secondary	Married	Urban	Homosexual	able-bodied	African	Christian	lifelong Democrat
	4	7	2	5	8	3	0.15, 0.26	0.49, 0.59	0.15	0.26	0.49	0.59	1.78431	1.52694	0.205	0.54	1.65563	15 to 24	Female	Lower secondary	Widowed	Rural	Heterosexual	able-bodied	Asian	Atheist	Donald Trump Supporter
	6	9	2	7	10	3	0.36, 0.45	0.51, 0.61	0.36	0.45	0.51	0.61	1.79265	1.44279	0.405	0.56	1.61772	55 to 64	Male	Short-cycle tertiary	Married	Urban	Bisexual	physically-disabled	African	Christian	Donald Trump Supporter
	5	8	2	6	9	3	0.26, 0.35	0.51, 0.59	0.26	0.35	0.51	0.59	1.78364	1.48349	0.305	0.55	1.63357	Over 65	Male	Lower secondary	Never married	Urban	Bisexual	able-bodied	Hispanic	Atheist	lifelong Republican
	7	8	2	8	9	3	0.37, 0.45	0.62, 0.70	0.37	0.45	0.62	0.70	1.79337	1.44082	0.41	0.66	1.6171	Over 65	Male	Below lower secondary	Widowed	Urban	Heterosexual	able-bodied	Hispanic	Atheist	lifelong Democrat
	6	7	2	7	8	3	0.26, 0.36	0.60, 0.70	0.26	0.36	0.60	0.70	1.78385	1.48139	0.31	0.65	1.63262	25 to 34	Female	Lower secondary	Married	Rural	Bisexual	physically-disabled	African	Jewish	Barack Obama Supporter
	7	9	2	8	10	3	0.41, 0.50	0.56, 0.66	0.41	0.50	0.56	0.66	1.80109	1.42343	0.455	0.61	1.61226	45 to 54	Male	Graduate	Married	Rural	Asexual	physically-disabled	Asian	Atheist	Barack Obama Supporter
	6	7	2	7	8	3	0.26, 0.36	0.60, 0.70	0.26	0.36	0.60	0.70	1.78385	1.48139	0.31	0.65	1.63262	15 to 24	Male	Graduate	Widowed	Urban	Homosexual	able-bodied	Caucasian	Atheist	lifelong Republican
	5	7	2	6	8	3	0.21, 0.31	0.55, 0.64	0.21	0.31	0.55	0.64	1.7828	1.5027	0.26	0.595	1.64275	35 to 44	Male	Below lower secondary	Widowed	Rural	Homosexual	able-bodied	Asian	Christian	Donald Trump Supporter
	4	9	2	5	10	3	0.26, 0.36	0.40, 0.50	0.26	0.36	0.40	0.50	1.78385	1.48139	0.31	0.45	1.63262	25 to 34	Male	Lower secondary	Widowed	Urban	Heterosexual	physically-disabled	African	Religious	Donald Trump Supporter
	6	7	2	7	8	3	0.26, 0.36	0.60, 0.70	0.26	0.36	0.60	0.70	1.78385	1.48139	0.31	0.65	1.63262	15 to 24	Female	Below lower secondary	Divorced	Rural	Asexual	able-bodied	Caucasian	Atheist	lifelong Democrat
	6	11	2	7	12	3	0.47, 0.56	0.39, 0.50	0.47	0.56	0.39	0.50	1.81493	1.40106	0.515	0.445	1.608	Over 65	Male	Below lower secondary	Widowed	Urban	Asexual	physically-disabled	Asian	Atheist	Barack Obama Supporter
	7	9	2	8	10	3	0.41, 0.50	0.56, 0.66	0.41	0.50	0.56	0.66	1.80109	1.42343	0.455	0.61	1.61226	15 to 24	Female	Short-cycle tertiary	Married	Urban	Homosexual	able-bodied	Hispanic	Jewish	lifelong Republican
	6	7	2	7	8	3	0.26, 0.36	0.60, 0.70	0.26	0.36	0.60	0.70	1.78385	1.48139	0.31	0.65	1.63262	25 to 34	Female	Short-cycle tertiary	Never married	Rural	Homosexual	physically-disabled	Hispanic	Religious	Donald Trump Supporter
	7	10	2	8	11	3	0.46, 0.55	0.51, 0.60	0.46	0.55	0.51	0.60	1.81233	1.40473	0.505	0.555	1.60853	45 to 54	Female	Short-cycle tertiary	Widowed	Rural	Homosexual	able-bodied	Asian	Jewish	lifelong Democrat
	6	7	2	7	8	3	0.26, 0.36	0.60, 0.70	0.26	0.36	0.60	0.70	1.78385	1.48139	0.31	0.65	1.63262	35 to 44	Male	Below lower secondary	Married	Rural	Asexual	able-bodied	African	Jewish	lifelong Democrat
	4	7	2	5	8	3	0.15, 0.26	0.49, 0.59	0.15	0.26	0.49	0.59	1.78431	1.52694	0.205	0.54	1.65563	55 to 64	Male	Upper secondary	Divorced	Rural	Heterosexual	physically-disabled	Asian	Christian	lifelong Republican
	7	9	2	8	10	3	0.41, 0.50	0.56, 0.66	0.41	0.50	0.56	0.66	1.80109	1.42343	0.455	0.61	1.61226	25 to 34	Male	Below lower secondary	Never married	Rural	Asexual	physically-disabled	Asian	Atheist	lifelong Republican
	5	7	2	6	8	3	0.21, 0.31	0.55, 0.64	0.21	0.31	0.55	0.64	1.7828	1.5027	0.26	0.595	1.64275	15 to 24	Male	Short-cycle tertiary	Married	Rural	Homosexual	able-bodied	Caucasian	Atheist	lifelong Democrat
	6	7	2	7	8	3	0.26, 0.36	0.60, 0.70	0.26	0.36	0.60	0.70	1.78385	1.48139	0.31	0.65	1.63262	35 to 44	Male	Below lower secondary	Never married	Rural	Bisexual	physically-disabled	Hispanic	Atheist	Barack Obama Supporter
	6	7	2	7	8	3	0.26, 0.36	0.60, 0.70	0.26	0.36	0.60	0.70	1.78385	1.48139	0.31	0.65	1.63262	35 to 44	Female	Below lower secondary	Married	Rural	Homosexual	able-bodied	Asian	Christian	Barack Obama Supporter
	6	9	2	7	10	3	0.36, 0.45	0.51, 0.61	0.36	0.45	0.51	0.61	1.79265	1.44279	0.405	0.56	1.61772	Over 65	Female	Short-cycle tertiary	Married	Urban	Asexual	able-bodied	Caucasian	Atheist	lifelong Republican
	7	9	2	8	10	3	0.41, 0.50	0.56, 0.66	0.41	0.50	0.56	0.66	1.80109	1.42343	0.455	0.61	1.61226	15 to 24	Male	Bachelor	Divorced	Rural	Asexual	physically-disabled	Asian	Jewish	Barack Obama Supporter
	7	11	2	8	12	3	0.51, 0.60	0.45, 0.55	0.51	0.60	0.45	0.55	1.82653	1.38666	0.555	0.5	1.60659	Over 65	Male	Graduate	Widowed	Urban	Homosexual	physically-disabled	African	Atheist	lifelong Republican
	7	10	2	8	11	3	0.46, 0.55	0.51, 0.60	0.46	0.55	0.51	0.60	1.81233	1.40473	0.505	0.555	1.60853	55 to 64	Male	Graduate	Divorced	Rural	Bisexual	able-bodied	African	Atheist	Barack Obama Supporter
	6	7	2	7	8	3	0.26, 0.36	0.60, 0.70	0.26	0.36	0.60	0.70	1.78385	1.48139	0.31	0.65	1.63262	35 to 44	Male	Lower secondary	Widowed	Urban	Bisexual	physically-disabled	Caucasian	Jewish	Barack Obama Supporter
	6	7	2	7	8	3	0.26, 0.36	0.60, 0.70	0.26	0.36	0.60	0.70	1.78385	1.48139	0.31	0.65	1.63262	25 to 34	Male	Short-cycle tertiary	Never married	Urban	Heterosexual	able-bodied	Hispanic	Christian	Donald Trump Supporter
	7	9	2	8	10	3	0.41, 0.50	0.56, 0.66	0.41	0.50	0.56	0.66	1.80109	1.42343	0.455	0.61	1.61226	55 to 64	Female	Short-cycle tertiary	Never married	Urban	Homosexual	able-bodied	Asian	Jewish	lifelong Democrat
	6	7	2	7	8	3	0.26, 0.36	0.60, 0.70	0.26	0.36	0.60	0.70	1.78385	1.48139	0.31	0.65	1.63262	35 to 44	Male	Graduate	Divorced	Rural	Homosexual	able-bodied	Asian	Jewish	Donald Trump Supporter
	6	7	3	7	8	4	0.26, 0.36	0.60, 0.70	0.26	0.36	0.60	0.70	2.26605	1.78385	0.31	0.65	2.02495	25 to 34	Female	Below lower secondary	Never married	Rural	Bisexual	physically-disabled	African	Christian	lifelong Democrat
	5	7	3	6	8	4	0.21, 0.31	0.55, 0.64	0.21	0.31	0.55	0.64	2.28175	1.7828	0.26	0.595	2.03228	15 to 24	Female	Upper secondary	Never married	Rural	Asexual	able-bodied	Hispanic	Christian	lifelong Republican
	6	7	3	7	8	4	0.26, 0.36	0.60, 0.70	0.26	0.36	0.60	0.70	2.26605	1.78385	0.31	0.65	2.02495	45 to 54	Male	Short-cycle tertiary	Widowed	Urban	Heterosexual	able-bodied	Caucasian	Religious	lifelong Democrat
	7	9	3	8	10	4	0.41, 0.50	0.56, 0.66	0.41	0.50	0.56	0.66	2.24035	1.80109	0.455	0.61	2.02072	25 to 34	Male	Short-cycle tertiary	Married	Urban	Bisexual	able-bodied	Hispanic	Religious	lifelong Democrat
	6	7	3	7	8	4	0.26, 0.36	0.60, 0.70	0.26	0.36	0.60	0.70	2.26605	1.78385	0.31	0.65	2.02495	15 to 24	Female	Bachelor	Never married	Urban	Asexual	able-bodied	Asian	Jewish	lifelong Republican
	4	7	3	5	8	4	0.15, 0.26	0.49, 0.59	0.15	0.26	0.49	0.59	2.30293	1.78431	0.205	0.54	2.04362	Over 65	Male	Short-cycle tertiary	Widowed	Rural	Heterosexual	able-bodied	Caucasian	Jewish	Donald Trump Supporter
	7	10	3	8	11	4	0.46, 0.55	0.51, 0.60	0.46	0.55	0.51	0.60	2.23861	1.81233	0.505	0.555	2.02547	25 to 34	Male	Lower secondary	Divorced	Rural	Bisexual	physically-disabled	Asian	Atheist	lifelong Republican
	6	7	3	7	8	4	0.26, 0.36	0.60, 0.70	0.26	0.36	0.60	0.70	2.26605	1.78385	0.31	0.65	2.02495	25 to 34	Female	Short-cycle tertiary	Divorced	Rural	Bisexual	physically-disabled	Hispanic	Jewish	Donald Trump Supporter
	7	9	3	8	10	4	0.41, 0.50	0.56, 0.66	0.41	0.50	0.56	0.66	2.24035	1.80109	0.455	0.61	2.02072	35 to 44	Male	Below lower secondary	Divorced	Rural	Bisexual	physically-disabled	Asian	Religious	lifelong Democrat
	7	10	3	8	11	4	0.46, 0.55	0.51, 0.60	0.46	0.55	0.51	0.60	2.23861	1.81233	0.505	0.555	2.02547	45 to 54	Male	Short-cycle tertiary	Never married	Rural	Bisexual	physically-disabled	Hispanic	Christian	lifelong Democrat
	5	11	3	6	12	4	0.43, 0.51	0.34, 0.44	0.43	0.51	0.34	0.44	2.23943	1.80416	0.47	0.39	2.02179	55 to 64	Female	Lower secondary	Never married	Urban	Asexual	physically-disabled	African	Religious	lifelong Democrat
	6	9	3	7	10	4	0.36, 0.45	0.51, 0.61	0.36	0.45	0.51	0.61	2.2458	1.79265	0.405	0.56	2.01922	35 to 44	Female	Upper secondary	Married	Rural	Asexual	able-bodied	Asian	Jewish	lifelong Democrat
	6	7	3	7	8	4	0.26, 0.36	0.60, 0.70	0.26	0.36	0.60	0.70	2.26605	1.78385	0.31	0.65	2.02495	45 to 54	Male	Below lower secondary	Divorced	Rural	Homosexual	able-bodied	African	Jewish	lifelong Democrat
	6	7	3	7	8	4	0.26, 0.36	0.60, 0.70	0.26	0.36	0.60	0.70	2.26605	1.78385	0.31	0.65	2.02495	45 to 54	Male	Bachelor	Widowed	Rural	Asexual	able-bodied	Hispanic	Christian	Barack Obama Supporter
	5	11	3	6	12	4	0.43, 0.51	0.34, 0.44	0.43	0.51	0.34	0.44	2.23943	1.80416	0.47	0.39	2.02179	55 to 64	Female	Lower secondary	Widowed	Rural	Heterosexual	physically-disabled	Hispanic	Jewish	lifelong Republican
	7	9	3	8	10	4	0.41, 0.50	0.56, 0.66	0.41	0.50	0.56	0.66	2.24035	1.80109	0.455	0.61	2.02072	45 to 54	Male	Short-cycle tertiary	Widowed	Urban	Homosexual	able-bodied	African	Christian	lifelong Republican
	6	7	3	7	8	4	0.26, 0.36	0.60, 0.70	0.26	0.36	0.60	0.70	2.26605	1.78385	0.31	0.65	2.02495	25 to 34	Male	Short-cycle tertiary	Never married	Urban	Asexual	able-bodied	African	Religious	lifelong Republican
	6	9	3	7	10	4	0.36, 0.45	0.51, 0.61	0.36	0.45	0.51	0.61	2.2458	1.79265	0.405	0.56	2.01922	35 to 44	Female	Lower secondary	Divorced	Urban	Bisexual	physically-disabled	African	Atheist	Barack Obama Supporter
	4	7	3	5	8	4	0.15, 0.26	0.49, 0.59	0.15	0.26	0.49	0.59	2.30293	1.78431	0.205	0.54	2.04362	15 to 24	Female	Short-cycle tertiary	Widowed	Rural	Bisexual	physically-disabled	Asian	Atheist	Barack Obama Supporter
	6	9	3	7	10	4	0.36, 0.45	0.51, 0.61	0.36	0.45	0.51	0.61	2.2458	1.79265	0.405	0.56	2.01922	25 to 34	Female	Graduate	Married	Urban	Bisexual	physically-disabled	Caucasian	Religious	Barack Obama Supporter
	4	7	3	5	8	4	0.15, 0.26	0.49, 0.59	0.15	0.26	0.49	0.59	2.30293	1.78431	0.205	0.54	2.04362	15 to 24	Male	Below lower secondary	Never married	Urban	Asexual	able-bodied	African	Christian	Barack Obama Supporter
	6	7	3	7	8	4	0.26, 0.36	0.60, 0.70	0.26	0.36	0.60	0.70	2.26605	1.78385	0.31	0.65	2.02495	45 to 54	Male	Upper secondary	Never married	Rural	Asexual	physically-disabled	Asian	Jewish	Barack Obama Supporter
	7	9	3	8	10	4	0.41, 0.50	0.56, 0.66	0.41	0.50	0.56	0.66	2.24035	1.80109	0.455	0.61	2.02072	55 to 64	Male	Upper secondary	Divorced	Rural	Bisexual	physically-disabled	Asian	Christian	Donald Trump Supporter
	7	10	3	8	11	4	0.46, 0.55	0.51, 0.60	0.46	0.55	0.51	0.60	2.23861	1.81233	0.505	0.555	2.02547	Over 65	Female	Graduate	Widowed	Rural	Homosexual	able-bodied	Caucasian	Atheist	lifelong Democrat
	6	7	3	7	8	4	0.26, 0.36	0.60, 0.70	0.26	0.36	0.60	0.70	2.26605	1.78385	0.31	0.65	2.02495	45 to 54	Female	Graduate	Divorced	Rural	Homosexual	able-bodied	Asian	Jewish	lifelong Republican
	7	10	3	8	11	4	0.46, 0.55	0.51, 0.60	0.46	0.55	0.51	0.60	2.23861	1.81233	0.505	0.555	2.02547	15 to 24	Female	Lower secondary	Never married	Urban	Bisexual	able-bodied	African	Christian	Barack Obama Supporter
	6	7	3	7	8	4	0.26, 0.36	0.60, 0.70	0.26	0.36	0.60	0.70	2.26605	1.78385	0.31	0.65	2.02495	15 to 24	Female	Upper secondary	Divorced	Urban	Asexual	physically-disabled	Hispanic	Atheist	lifelong Democrat
	6	7	3	7	8	4	0.26, 0.36	0.60, 0.70	0.26	0.36	0.60	0.70	2.26605	1.78385	0.31	0.65	2.02495	Over 65	Male	Lower secondary	Widowed	Rural	Heterosexual	physically-disabled	Caucasian	Jewish	Barack Obama Supporter
	6	7	3	7	8	4	0.26, 0.36	0.60, 0.70	0.26	0.36	0.60	0.70	2.26605	1.78385	0.31	0.65	2.02495	35 to 44	Male	Bachelor	Never married	Urban	Heterosexual	physically-disabled	Asian	Religious	Donald Trump Supporter
	5	7	3	6	8	4	0.21, 0.31	0.55, 0.64	0.21	0.31	0.55	0.64	2.28175	1.7828	0.26	0.595	2.03228	45 to 54	Female	Lower secondary	Never married	Urban	Bisexual	physically-disabled	African	Christian	lifelong Republican
	6	7	3	7	8	4	0.26, 0.36	0.60, 0.70	0.26	0.36	0.60	0.70	2.26605	1.78385	0.31	0.65	2.02495	45 to 54	Male	Graduate	Divorced	Urban	Bisexual	able-bodied	Hispanic	Religious	Barack Obama Supporter
	7	10	3	8	11	4	0.46, 0.55	0.51, 0.60	0.46	0.55	0.51	0.60	2.23861	1.81233	0.505	0.555	2.02547	55 to 64	Female	Bachelor	Married	Rural	Bisexual	physically-disabled	Caucasian	Christian	Barack Obama Supporter
	4	7	3	5	8	4	0.15, 0.26	0.49, 0.59	0.15	0.26	0.49	0.59	2.30293	1.78431	0.205	0.54	2.04362	25 to 34	Female	Below lower secondary	Never married	Rural	Homosexual	able-bodied	African	Religious	lifelong Republican
	6	7	3	7	8	4	0.26, 0.36	0.60, 0.70	0.26	0.36	0.60	0.70	2.26605	1.78385	0.31	0.65	2.02495	35 to 44	Female	Bachelor	Married	Urban	Heterosexual	able-bodied	Caucasian	Religious	lifelong Republican
	6	7	3	7	8	4	0.26, 0.36	0.60, 0.70	0.26	0.36	0.60	0.70	2.26605	1.78385	0.31	0.65	2.02495	45 to 54	Male	Graduate	Widowed	Rural	Homosexual	physically-disabled	Hispanic	Religious	lifelong Democrat
	6	9	3	7	10	4	0.36, 0.45	0.51, 0.61	0.36	0.45	0.51	0.61	2.2458	1.79265	0.405	0.56	2.01922	45 to 54	Female	Short-cycle tertiary	Widowed	Rural	Homosexual	able-bodied	African	Religious	lifelong Democrat
	5	7	3	6	8	4	0.21, 0.31	0.55, 0.64	0.21	0.31	0.55	0.64	2.28175	1.7828	0.26	0.595	2.03228	35 to 44	Male	Upper secondary	Married	Rural	Heterosexual	physically-disabled	Asian	Religious	Donald Trump Supporter
	7	6	3	8	7	4	0.25, 0.36	0.71, 0.82	0.25	0.36	0.71	0.82	2.26747	1.78364	0.305	0.765	2.02555	35 to 44	Female	Graduate	Married	Urban	Homosexual	able-bodied	Caucasian	Christian	lifelong Democrat
	6	7	3	7	8	4	0.26, 0.36	0.60, 0.70	0.26	0.36	0.60	0.70	2.26605	1.78385	0.31	0.65	2.02495	45 to 54	Female	Short-cycle tertiary	Married	Rural	Homosexual	able-bodied	Hispanic	Christian	lifelong Republican
	7	10	3	8	11	4	0.46, 0.55	0.51, 0.60	0.46	0.55	0.51	0.60	2.23861	1.81233	0.505	0.555	2.02547	Over 65	Male	Short-cycle tertiary	Widowed	Rural	Asexual	able-bodied	Hispanic	Religious	Barack Obama Supporter
	7	10	3	8	11	4	0.46, 0.55	0.51, 0.60	0.46	0.55	0.51	0.60	2.23861	1.81233	0.505	0.555	2.02547	45 to 54	Male	Short-cycle tertiary	Divorced	Urban	Asexual	physically-disabled	Hispanic	Religious	lifelong Republican
	6	7	3	7	8	4	0.26, 0.36	0.60, 0.70	0.26	0.36	0.60	0.70	2.26605	1.78385	0.31	0.65	2.02495	45 to 54	Female	Bachelor	Divorced	Urban	Bisexual	able-bodied	Hispanic	Jewish	Barack Obama Supporter
	7	6	3	8	7	4	0.25, 0.36	0.71, 0.82	0.25	0.36	0.71	0.82	2.26747	1.78364	0.305	0.765	2.02555	35 to 44	Male	Graduate	Married	Rural	Asexual	physically-disabled	Hispanic	Jewish	Donald Trump Supporter
	6	7	3	7	8	4	0.26, 0.36	0.60, 0.70	0.26	0.36	0.60	0.70	2.26605	1.78385	0.31	0.65	2.02495	45 to 54	Male	Lower secondary	Never married	Rural	Asexual	physically-disabled	Caucasian	Religious	lifelong Republican
	7	9	3	8	10	4	0.41, 0.50	0.56, 0.66	0.41	0.50	0.56	0.66	2.24035	1.80109	0.455	0.61	2.02072	15 to 24	Male	Below lower secondary	Never married	Rural	Homosexual	physically-disabled	Asian	Atheist	Donald Trump Supporter
	7	6	3	8	7	4	0.25, 0.36	0.71, 0.82	0.25	0.36	0.71	0.82	2.26747	1.78364	0.305	0.765	2.02555	25 to 34	Male	Bachelor	Never married	Rural	Heterosexual	able-bodied	Hispanic	Jewish	Donald Trump Supporter
	7	9	3	8	10	4	0.41, 0.50	0.56, 0.66	0.41	0.50	0.56	0.66	2.24035	1.80109	0.455	0.61	2.02072	35 to 44	Male	Graduate	Never married	Rural	Asexual	able-bodied	Hispanic	Jewish	lifelong Democrat
	7	10	3	8	11	4	0.46, 0.55	0.51, 0.60	0.46	0.55	0.51	0.60	2.23861	1.81233	0.505	0.555	2.02547	Over 65	Female	Short-cycle tertiary	Widowed	Urban	Homosexual	physically-disabled	Asian	Jewish	Donald Trump Supporter
	7	10	3	8	11	4	0.46, 0.55	0.51, 0.60	0.46	0.55	0.51	0.60	2.23861	1.81233	0.505	0.555	2.02547	Over 65	Female	Upper secondary	Divorced	Rural	Asexual	able-bodied	Hispanic	Jewish	Barack Obama Supporter
	6	7	3	7	8	4	0.26, 0.36	0.60, 0.70	0.26	0.36	0.60	0.70	2.26605	1.78385	0.31	0.65	2.02495	45 to 54	Male	Short-cycle tertiary	Married	Urban	Asexual	able-bodied	Caucasian	Religious	lifelong Republican
	6	7	3	7	8	4	0.26, 0.36	0.60, 0.70	0.26	0.36	0.60	0.70	2.26605	1.78385	0.31	0.65	2.02495	55 to 64	Male	Below lower secondary	Married	Urban	Homosexual	able-bodied	African	Jewish	Donald Trump Supporter
	6	10	3	7	11	4	0.41, 0.51	0.45, 0.55	0.41	0.51	0.45	0.55	2.24	1.80208	0.46	0.5	2.02104	55 to 64	Male	Upper secondary	Never married	Urban	Asexual	physically-disabled	Caucasian	Christian	Donald Trump Supporter
	6	7	3	7	8	4	0.26, 0.36	0.60, 0.70	0.26	0.36	0.60	0.70	2.26605	1.78385	0.31	0.65	2.02495	25 to 34	Female	Graduate	Never married	Urban	Heterosexual	able-bodied	Caucasian	Jewish	Barack Obama Supporter
	7	9	3	8	10	4	0.41, 0.50	0.56, 0.66	0.41	0.50	0.56	0.66	2.24035	1.80109	0.455	0.61	2.02072	35 to 44	Female	Graduate	Married	Urban	Homosexual	able-bodied	African	Atheist	lifelong Democrat
	5	10	3	6	11	4	0.37, 0.46	0.40, 0.50	0.37	0.46	0.40	0.50	2.24442	1.79412	0.415	0.45	2.01927	55 to 64	Female	Below lower secondary	Widowed	Urban	Asexual	able-bodied	Caucasian	Religious	lifelong Republican
	5	10	3	6	11	4	0.37, 0.46	0.40, 0.50	0.37	0.46	0.40	0.50	2.24442	1.79412	0.415	0.45	2.01927	55 to 64	Female	Lower secondary	Never married	Urban	Homosexual	physically-disabled	Caucasian	Atheist	lifelong Democrat
	6	7	3	7	8	4	0.26, 0.36	0.60, 0.70	0.26	0.36	0.60	0.70	2.26605	1.78385	0.31	0.65	2.02495	25 to 34	Female	Short-cycle tertiary	Never married	Rural	Homosexual	able-bodied	Asian	Jewish	lifelong Democrat
	5	9	3	6	10	4	0.31, 0.41	0.45, 0.55	0.31	0.41	0.45	0.55	2.25381	1.78734	0.36	0.5	2.02057	35 to 44	Female	Upper secondary	Married	Rural	Homosexual	physically-disabled	Caucasian	Christian	lifelong Republican
	7	8	3	8	9	4	0.37, 0.45	0.62, 0.70	0.37	0.45	0.62	0.70	2.24509	1.79337	0.41	0.66	2.01923	25 to 34	Female	Short-cycle tertiary	Never married	Urban	Bisexual	physically-disabled	Caucasian	Religious	lifelong Democrat
	7	7	3	8	8	4	0.32, 0.41	0.66, 0.75	0.32	0.41	0.66	0.75	2.25277	1.78782	0.365	0.705	2.0203	25 to 34	Male	Short-cycle tertiary	Widowed	Urban	Asexual	physically-disabled	Hispanic	Christian	lifelong Republican
	7	10	3	8	11	4	0.46, 0.55	0.51, 0.60	0.46	0.55	0.51	0.60	2.23861	1.81233	0.505	0.555	2.02547	55 to 64	Male	Bachelor	Never married	Rural	Homosexual	able-bodied	African	Jewish	Donald Trump Supporter
	6	7	3	7	8	4	0.26, 0.36	0.60, 0.70	0.26	0.36	0.60	0.70	2.26605	1.78385	0.31	0.65	2.02495	15 to 24	Male	Upper secondary	Married	Urban	Asexual	able-bodied	African	Atheist	lifelong Republican
	6	7	3	7	8	4	0.26, 0.36	0.60, 0.70	0.26	0.36	0.60	0.70	2.26605	1.78385	0.31	0.65	2.02495	25 to 34	Male	Bachelor	Divorced	Urban	Heterosexual	able-bodied	Asian	Religious	Barack Obama Supporter
	7	10	3	8	11	4	0.46, 0.55	0.51, 0.60	0.46	0.55	0.51	0.60	2.23861	1.81233	0.505	0.555	2.02547	15 to 24	Male	Short-cycle tertiary	Never married	Urban	Homosexual	able-bodied	Asian	Jewish	lifelong Republican
	5	7	3	6	8	4	0.21, 0.31	0.55, 0.64	0.21	0.31	0.55	0.64	2.28175	1.7828	0.26	0.595	2.03228	Over 65	Female	Short-cycle tertiary	Widowed	Urban	Asexual	physically-disabled	Asian	Christian	Barack Obama Supporter
	6	7	3	7	8	4	0.26, 0.36	0.60, 0.70	0.26	0.36	0.60	0.70	2.26605	1.78385	0.31	0.65	2.02495	35 to 44	Male	Lower secondary	Married	Rural	Homosexual	able-bodied	African	Atheist	Barack Obama Supporter
	6	7	3	7	8	4	0.26, 0.36	0.60, 0.70	0.26	0.36	0.60	0.70	2.26605	1.78385	0.31	0.65	2.02495	Over 65	Male	Below lower secondary	Never married	Urban	Bisexual	physically-disabled	Caucasian	Jewish	lifelong Democrat
	6	9	3	7	10	4	0.36, 0.45	0.51, 0.61	0.36	0.45	0.51	0.61	2.2458	1.79265	0.405	0.56	2.01922	45 to 54	Female	Lower secondary	Married	Rural	Heterosexual	able-bodied	Hispanic	Atheist	Barack Obama Supporter
	7	9	3	8	10	4	0.41, 0.50	0.56, 0.66	0.41	0.50	0.56	0.66	2.24035	1.80109	0.455	0.61	2.02072	55 to 64	Female	Short-cycle tertiary	Divorced	Rural	Asexual	physically-disabled	Asian	Jewish	Barack Obama Supporter
	6	7	3	7	8	4	0.26, 0.36	0.60, 0.70	0.26	0.36	0.60	0.70	2.26605	1.78385	0.31	0.65	2.02495	Over 65	Female	Short-cycle tertiary	Married	Urban	Homosexual	able-bodied	Caucasian	Christian	Barack Obama Supporter
	4	7	3	5	8	4	0.15, 0.26	0.49, 0.59	0.15	0.26	0.49	0.59	2.30293	1.78431	0.205	0.54	2.04362	15 to 24	Male	Below lower secondary	Never married	Rural	Asexual	able-bodied	African	Jewish	Donald Trump Supporter
	6	7	3	7	8	4	0.26, 0.36	0.60, 0.70	0.26	0.36	0.60	0.70	2.26605	1.78385	0.31	0.65	2.02495	45 to 54	Female	Upper secondary	Married	Urban	Heterosexual	physically-disabled	Asian	Atheist	Barack Obama Supporter
	7	9	3	8	10	4	0.41, 0.50	0.56, 0.66	0.41	0.50	0.56	0.66	2.24035	1.80109	0.455	0.61	2.02072	15 to 24	Male	Short-cycle tertiary	Never married	Rural	Bisexual	able-bodied	African	Atheist	Donald Trump Supporter
	6	8	3	7	9	4	0.31, 0.40	0.56, 0.65	0.31	0.40	0.56	0.65	2.25487	1.78688	0.355	0.605	2.02087	55 to 64	Male	Upper secondary	Never married	Rural	Heterosexual	able-bodied	Hispanic	Jewish	Barack Obama Supporter
	6	9	3	7	10	4	0.36, 0.45	0.51, 0.61	0.36	0.45	0.51	0.61	2.2458	1.79265	0.405	0.56	2.01922	45 to 54	Male	Below lower secondary	Divorced	Urban	Asexual	physically-disabled	Caucasian	Jewish	lifelong Republican
	7	10	3	8	11	4	0.46, 0.55	0.51, 0.60	0.46	0.55	0.51	0.60	2.23861	1.81233	0.505	0.555	2.02547	Over 65	Female	Upper secondary	Divorced	Rural	Asexual	able-bodied	Hispanic	Atheist	lifelong Democrat
	7	9	3	8	10	4	0.41, 0.50	0.56, 0.66	0.41	0.50	0.56	0.66	2.24035	1.80109	0.455	0.61	2.02072	45 to 54	Male	Graduate	Divorced	Urban	Asexual	able-bodied	Hispanic	Religious	Donald Trump Supporter
	6	7	3	7	8	4	0.26, 0.36	0.60, 0.70	0.26	0.36	0.60	0.70	2.26605	1.78385	0.31	0.65	2.02495	45 to 54	Male	Below lower secondary	Married	Rural	Bisexual	able-bodied	Hispanic	Jewish	lifelong Republican
	6	7	3	7	8	4	0.26, 0.36	0.60, 0.70	0.26	0.36	0.60	0.70	2.26605	1.78385	0.31	0.65	2.02495	55 to 64	Male	Graduate	Divorced	Urban	Bisexual	able-bodied	Asian	Atheist	lifelong Republican
	7	7	3	8	8	4	0.32, 0.41	0.66, 0.75	0.32	0.41	0.66	0.75	2.25277	1.78782	0.365	0.705	2.0203	25 to 34	Female	Short-cycle tertiary	Never married	Rural	Heterosexual	able-bodied	African	Jewish	lifelong Democrat
	7	9	3	8	10	4	0.41, 0.50	0.56, 0.66	0.41	0.50	0.56	0.66	2.24035	1.80109	0.455	0.61	2.02072	25 to 34	Male	Short-cycle tertiary	Divorced	Rural	Asexual	physically-disabled	Asian	Christian	lifelong Republican
	8	10	3	9	11	4	0.50, 0.58	0.56, 0.65	0.50	0.58	0.56	0.65	2.23967	1.82195	0.54	0.605	2.03081	Over 65	Female	Short-cycle tertiary	Widowed	Rural	Bisexual	physically-disabled	Caucasian	Atheist	Barack Obama Supporter
	6	10	3	7	11	4	0.41, 0.51	0.45, 0.55	0.41	0.51	0.45	0.55	2.24	1.80208	0.46	0.5	2.02104	55 to 64	Female	Lower secondary	Divorced	Urban	Bisexual	able-bodied	Hispanic	Jewish	Barack Obama Supporter
	6	7	3	7	8	4	0.26, 0.36	0.60, 0.70	0.26	0.36	0.60	0.70	2.26605	1.78385	0.31	0.65	2.02495	45 to 54	Female	Bachelor	Divorced	Rural	Heterosexual	able-bodied	African	Atheist	Donald Trump Supporter
	6	7	3	7	8	4	0.26, 0.36	0.60, 0.70	0.26	0.36	0.60	0.70	2.26605	1.78385	0.31	0.65	2.02495	35 to 44	Female	Short-cycle tertiary	Divorced	Urban	Bisexual	physically-disabled	Hispanic	Jewish	lifelong Republican
	5	10	3	6	11	4	0.37, 0.46	0.40, 0.50	0.37	0.46	0.40	0.50	2.24442	1.79412	0.415	0.45	2.01927	35 to 44	Male	Lower secondary	Married	Rural	Bisexual	physically-disabled	African	Christian	Donald Trump Supporter
	6	7	3	7	8	4	0.26, 0.36	0.60, 0.70	0.26	0.36	0.60	0.70	2.26605	1.78385	0.31	0.65	2.02495	45 to 54	Male	Short-cycle tertiary	Divorced	Urban	Homosexual	able-bodied	Caucasian	Christian	lifelong Democrat
	5	7	3	6	8	4	0.21, 0.31	0.55, 0.64	0.21	0.31	0.55	0.64	2.28175	1.7828	0.26	0.595	2.03228	35 to 44	Male	Graduate	Never married	Rural	Heterosexual	physically-disabled	Caucasian	Atheist	lifelong Republican
	6	7	3	7	8	4	0.26, 0.36	0.60, 0.70	0.26	0.36	0.60	0.70	2.26605	1.78385	0.31	0.65	2.02495	Over 65	Male	Graduate	Widowed	Rural	Bisexual	physically-disabled	African	Jewish	lifelong Republican
	6	9	3	7	10	4	0.36, 0.45	0.51, 0.61	0.36	0.45	0.51	0.61	2.2458	1.79265	0.405	0.56	2.01922	45 to 54	Female	Bachelor	Divorced	Urban	Heterosexual	able-bodied	African	Christian	Donald Trump Supporter
	6	9	3	7	10	4	0.36, 0.45	0.51, 0.61	0.36	0.45	0.51	0.61	2.2458	1.79265	0.405	0.56	2.01922	55 to 64	Male	Upper secondary	Widowed	Urban	Asexual	physically-disabled	African	Jewish	Barack Obama Supporter
	6	10	3	7	11	4	0.41, 0.51	0.45, 0.55	0.41	0.51	0.45	0.55	2.24	1.80208	0.46	0.5	2.02104	55 to 64	Male	Upper secondary	Married	Rural	Asexual	physically-disabled	Caucasian	Christian	Donald Trump Supporter
	7	10	3	8	11	4	0.46, 0.55	0.51, 0.60	0.46	0.55	0.51	0.60	2.23861	1.81233	0.505	0.555	2.02547	Over 65	Male	Bachelor	Married	Urban	Homosexual	able-bodied	Hispanic	Jewish	lifelong Democrat
	6	7	3	7	8	4	0.26, 0.36	0.60, 0.70	0.26	0.36	0.60	0.70	2.26605	1.78385	0.31	0.65	2.02495	15 to 24	Male	Below lower secondary	Married	Rural	Asexual	able-bodied	African	Jewish	lifelong Democrat
	6	10	3	7	11	4	0.41, 0.51	0.45, 0.55	0.41	0.51	0.45	0.55	2.24	1.80208	0.46	0.5	2.02104	35 to 44	Male	Graduate	Widowed	Rural	Bisexual	able-bodied	Caucasian	Religious	Barack Obama Supporter
	7	9	3	8	10	4	0.41, 0.50	0.56, 0.66	0.41	0.50	0.56	0.66	2.24035	1.80109	0.455	0.61	2.02072	25 to 34	Male	Bachelor	Married	Rural	Homosexual	physically-disabled	Asian	Christian	lifelong Democrat
	6	7	3	7	8	4	0.26, 0.36	0.60, 0.70	0.26	0.36	0.60	0.70	2.26605	1.78385	0.31	0.65	2.02495	45 to 54	Female	Below lower secondary	Divorced	Urban	Asexual	able-bodied	African	Jewish	lifelong Republican
	4	7	3	5	8	4	0.15, 0.26	0.49, 0.59	0.15	0.26	0.49	0.59	2.30293	1.78431	0.205	0.54	2.04362	Over 65	Female	Lower secondary	Married	Urban	Heterosexual	physically-disabled	Asian	Jewish	lifelong Republican
	6	10	3	7	11	4	0.41, 0.51	0.45, 0.55	0.41	0.51	0.45	0.55	2.24	1.80208	0.46	0.5	2.02104	45 to 54	Female	Bachelor	Never married	Urban	Homosexual	able-bodied	African	Religious	lifelong Republican
	6	7	3	7	8	4	0.26, 0.36	0.60, 0.70	0.26	0.36	0.60	0.70	2.26605	1.78385	0.31	0.65	2.02495	35 to 44	Male	Graduate	Never married	Urban	Bisexual	able-bodied	Asian	Atheist	Barack Obama Supporter
	7	10	3	8	11	4	0.46, 0.55	0.51, 0.60	0.46	0.55	0.51	0.60	2.23861	1.81233	0.505	0.555	2.02547	45 to 54	Male	Graduate	Widowed	Rural	Bisexual	physically-disabled	Asian	Christian	lifelong Democrat
	6	7	3	7	8	4	0.26, 0.36	0.60, 0.70	0.26	0.36	0.60	0.70	2.26605	1.78385	0.31	0.65	2.02495	45 to 54	Female	Bachelor	Never married	Rural	Bisexual	physically-disabled	Caucasian	Christian	Barack Obama Supporter
	6	9	3	7	10	4	0.36, 0.45	0.51, 0.61	0.36	0.45	0.51	0.61	2.2458	1.79265	0.405	0.56	2.01922	55 to 64	Female	Upper secondary	Married	Rural	Bisexual	physically-disabled	Caucasian	Christian	lifelong Republican
	5	7	3	6	8	4	0.21, 0.31	0.55, 0.64	0.21	0.31	0.55	0.64	2.28175	1.7828	0.26	0.595	2.03228	Over 65	Female	Lower secondary	Never married	Urban	Heterosexual	physically-disabled	African	Atheist	lifelong Republican
	5	9	3	6	10	4	0.31, 0.41	0.45, 0.55	0.31	0.41	0.45	0.55	2.25381	1.78734	0.36	0.5	2.02057	35 to 44	Male	Below lower secondary	Married	Urban	Homosexual	physically-disabled	African	Christian	lifelong Republican
	6	8	3	7	9	4	0.31, 0.40	0.56, 0.65	0.31	0.40	0.56	0.65	2.25487	1.78688	0.355	0.605	2.02087	35 to 44	Male	Bachelor	Married	Urban	Bisexual	physically-disabled	Asian	Religious	lifelong Democrat
	4	10	3	5	11	4	0.32, 0.42	0.34, 0.45	0.32	0.42	0.34	0.45	2.25178	1.78834	0.37	0.395	2.02006	55 to 64	Male	Upper secondary	Widowed	Urban	Bisexual	physically-disabled	African	Religious	Donald Trump Supporter
	6	9	3	7	10	4	0.36, 0.45	0.51, 0.61	0.36	0.45	0.51	0.61	2.2458	1.79265	0.405	0.56	2.01922	25 to 34	Female	Lower secondary	Widowed	Urban	Bisexual	physically-disabled	Hispanic	Jewish	lifelong Republican
	7	9	3	8	10	4	0.41, 0.50	0.56, 0.66	0.41	0.50	0.56	0.66	2.24035	1.80109	0.455	0.61	2.02072	35 to 44	Male	Graduate	Married	Urban	Homosexual	physically-disabled	Caucasian	Jewish	lifelong Democrat
	6	9	3	7	10	4	0.36, 0.45	0.51, 0.61	0.36	0.45	0.51	0.61	2.2458	1.79265	0.405	0.56	2.01922	55 to 64	Male	Lower secondary	Widowed	Urban	Bisexual	physically-disabled	African	Atheist	lifelong Democrat
	6	7	3	7	8	4	0.26, 0.36	0.60, 0.70	0.26	0.36	0.60	0.70	2.26605	1.78385	0.31	0.65	2.02495	45 to 54	Female	Lower secondary	Divorced	Rural	Bisexual	physically-disabled	Asian	Atheist	lifelong Democrat
	6	7	3	7	8	4	0.26, 0.36	0.60, 0.70	0.26	0.36	0.60	0.70	2.26605	1.78385	0.31	0.65	2.02495	25 to 34	Female	Bachelor	Married	Rural	Heterosexual	able-bodied	Caucasian	Jewish	Barack Obama Supporter
	5	7	3	6	8	4	0.21, 0.31	0.55, 0.64	0.21	0.31	0.55	0.64	2.28175	1.7828	0.26	0.595	2.03228	Over 65	Male	Bachelor	Widowed	Urban	Asexual	able-bodied	Caucasian	Christian	Donald Trump Supporter
	5	7	3	6	8	4	0.21, 0.31	0.55, 0.64	0.21	0.31	0.55	0.64	2.28175	1.7828	0.26	0.595	2.03228	25 to 34	Female	Lower secondary	Never married	Urban	Heterosexual	physically-disabled	African	Christian	lifelong Republican
	5	7	3	6	8	4	0.21, 0.31	0.55, 0.64	0.21	0.31	0.55	0.64	2.28175	1.7828	0.26	0.595	2.03228	15 to 24	Female	Lower secondary	Widowed	Urban	Asexual	able-bodied	African	Atheist	Barack Obama Supporter
	6	7	3	7	8	4	0.26, 0.36	0.60, 0.70	0.26	0.36	0.60	0.70	2.26605	1.78385	0.31	0.65	2.02495	Over 65	Female	Short-cycle tertiary	Never married	Rural	Heterosexual	able-bodied	African	Christian	Barack Obama Supporter
	6	7	3	7	8	4	0.26, 0.36	0.60, 0.70	0.26	0.36	0.60	0.70	2.26605	1.78385	0.31	0.65	2.02495	45 to 54	Male	Upper secondary	Divorced	Rural	Heterosexual	able-bodied	Hispanic	Christian	lifelong Republican
	7	9	3	8	10	4	0.41, 0.50	0.56, 0.66	0.41	0.50	0.56	0.66	2.24035	1.80109	0.455	0.61	2.02072	35 to 44	Female	Graduate	Divorced	Rural	Bisexual	able-bodied	Asian	Christian	Donald Trump Supporter
	6	7	3	7	8	4	0.26, 0.36	0.60, 0.70	0.26	0.36	0.60	0.70	2.26605	1.78385	0.31	0.65	2.02495	45 to 54	Female	Below lower secondary	Divorced	Urban	Bisexual	able-bodied	Caucasian	Christian	Donald Trump Supporter
	6	7	3	7	8	4	0.26, 0.36	0.60, 0.70	0.26	0.36	0.60	0.70	2.26605	1.78385	0.31	0.65	2.02495	45 to 54	Female	Short-cycle tertiary	Married	Urban	Heterosexual	able-bodied	Caucasian	Christian	lifelong Republican
	7	9	3	8	10	4	0.41, 0.50	0.56, 0.66	0.41	0.50	0.56	0.66	2.24035	1.80109	0.455	0.61	2.02072	15 to 24	Male	Lower secondary	Never married	Rural	Asexual	physically-disabled	Asian	Christian	lifelong Republican
	7	10	3	8	11	4	0.46, 0.55	0.51, 0.60	0.46	0.55	0.51	0.60	2.23861	1.81233	0.505	0.555	2.02547	Over 65	Male	Short-cycle tertiary	Divorced	Urban	Heterosexual	able-bodied	Hispanic	Christian	lifelong Democrat
	6	9	3	7	10	4	0.36, 0.45	0.51, 0.61	0.36	0.45	0.51	0.61	2.2458	1.79265	0.405	0.56	2.01922	15 to 24	Female	Lower secondary	Never married	Urban	Asexual	physically-disabled	Asian	Atheist	Donald Trump Supporter
	6	7	3	7	8	4	0.26, 0.36	0.60, 0.70	0.26	0.36	0.60	0.70	2.26605	1.78385	0.31	0.65	2.02495	45 to 54	Female	Graduate	Married	Rural	Bisexual	physically-disabled	African	Atheist	lifelong Democrat
	6	10	3	7	11	4	0.41, 0.51	0.45, 0.55	0.41	0.51	0.45	0.55	2.24	1.80208	0.46	0.5	2.02104	15 to 24	Male	Upper secondary	Married	Rural	Bisexual	physically-disabled	African	Atheist	lifelong Republican
	6	7	3	7	8	4	0.26, 0.36	0.60, 0.70	0.26	0.36	0.60	0.70	2.26605	1.78385	0.31	0.65	2.02495	45 to 54	Male	Below lower secondary	Married	Urban	Homosexual	able-bodied	African	Jewish	Barack Obama Supporter
	6	7	3	7	8	4	0.26, 0.36	0.60, 0.70	0.26	0.36	0.60	0.70	2.26605	1.78385	0.31	0.65	2.02495	45 to 54	Male	Short-cycle tertiary	Married	Urban	Homosexual	physically-disabled	Caucasian	Christian	lifelong Democrat
	6	7	3	7	8	4	0.26, 0.36	0.60, 0.70	0.26	0.36	0.60	0.70	2.26605	1.78385	0.31	0.65	2.02495	25 to 34	Male	Graduate	Never married	Rural	Heterosexual	able-bodied	Asian	Jewish	Donald Trump Supporter
	7	10	3	8	11	4	0.46, 0.55	0.51, 0.60	0.46	0.55	0.51	0.60	2.23861	1.81233	0.505	0.555	2.02547	45 to 54	Female	Short-cycle tertiary	Widowed	Rural	Homosexual	physically-disabled	African	Religious	Donald Trump Supporter
	7	9	3	8	10	4	0.41, 0.50	0.56, 0.66	0.41	0.50	0.56	0.66	2.24035	1.80109	0.455	0.61	2.02072	55 to 64	Male	Graduate	Never married	Urban	Heterosexual	physically-disabled	Caucasian	Atheist	lifelong Republican
	6	7	3	7	8	4	0.26, 0.36	0.60, 0.70	0.26	0.36	0.60	0.70	2.26605	1.78385	0.31	0.65	2.02495	15 to 24	Male	Lower secondary	Never married	Urban	Homosexual	able-bodied	Asian	Christian	Donald Trump Supporter
	7	9	3	8	10	4	0.41, 0.50	0.56, 0.66	0.41	0.50	0.56	0.66	2.24035	1.80109	0.455	0.61	2.02072	35 to 44	Female	Short-cycle tertiary	Married	Urban	Asexual	physically-disabled	African	Christian	Donald Trump Supporter
	6	7	3	7	8	4	0.26, 0.36	0.60, 0.70	0.26	0.36	0.60	0.70	2.26605	1.78385	0.31	0.65	2.02495	25 to 34	Male	Upper secondary	Married	Urban	Asexual	able-bodied	African	Jewish	lifelong Democrat
	7	9	3	8	10	4	0.41, 0.50	0.56, 0.66	0.41	0.50	0.56	0.66	2.24035	1.80109	0.455	0.61	2.02072	15 to 24	Female	Bachelor	Divorced	Urban	Asexual	physically-disabled	African	Jewish	lifelong Democrat
	6	7	3	7	8	4	0.26, 0.36	0.60, 0.70	0.26	0.36	0.60	0.70	2.26605	1.78385	0.31	0.65	2.02495	55 to 64	Female	Graduate	Widowed	Urban	Asexual	physically-disabled	Hispanic	Religious	Barack Obama Supporter
	6	9	3	7	10	4	0.36, 0.45	0.51, 0.61	0.36	0.45	0.51	0.61	2.2458	1.79265	0.405	0.56	2.01922	35 to 44	Male	Below lower secondary	Never married	Urban	Heterosexual	able-bodied	Asian	Religious	Barack Obama Supporter
	6	8	3	7	9	4	0.31, 0.40	0.56, 0.65	0.31	0.40	0.56	0.65	2.25487	1.78688	0.355	0.605	2.02087	Over 65	Male	Lower secondary	Widowed	Rural	Bisexual	physically-disabled	Asian	Religious	Barack Obama Supporter
	7	8	3	8	9	4	0.37, 0.45	0.62, 0.70	0.37	0.45	0.62	0.70	2.24509	1.79337	0.41	0.66	2.01923	25 to 34	Female	Graduate	Widowed	Urban	Homosexual	physically-disabled	African	Religious	lifelong Republican
	4	7	3	5	8	4	0.15, 0.26	0.49, 0.59	0.15	0.26	0.49	0.59	2.30293	1.78431	0.205	0.54	2.04362	45 to 54	Female	Lower secondary	Never married	Urban	Heterosexual	able-bodied	Asian	Jewish	lifelong Republican
	4	7	3	5	8	4	0.15, 0.26	0.49, 0.59	0.15	0.26	0.49	0.59	2.30293	1.78431	0.205	0.54	2.04362	55 to 64	Female	Lower secondary	Married	Urban	Heterosexual	able-bodied	Hispanic	Christian	Donald Trump Supporter
	5	7	3	6	8	4	0.21, 0.31	0.55, 0.64	0.21	0.31	0.55	0.64	2.28175	1.7828	0.26	0.595	2.03228	35 to 44	Female	Lower secondary	Widowed	Urban	Bisexual	physically-disabled	Asian	Jewish	lifelong Democrat
	6	7	3	7	8	4	0.26, 0.36	0.60, 0.70	0.26	0.36	0.60	0.70	2.26605	1.78385	0.31	0.65	2.02495	25 to 34	Female	Below lower secondary	Never married	Urban	Heterosexual	able-bodied	African	Jewish	lifelong Republican
	7	10	3	8	11	4	0.46, 0.55	0.51, 0.60	0.46	0.55	0.51	0.60	2.23861	1.81233	0.505	0.555	2.02547	25 to 34	Male	Short-cycle tertiary	Never married	Urban	Heterosexual	able-bodied	Caucasian	Atheist	Donald Trump Supporter
	6	8	3	7	9	4	0.31, 0.40	0.56, 0.65	0.31	0.40	0.56	0.65	2.25487	1.78688	0.355	0.605	2.02087	55 to 64	Female	Short-cycle tertiary	Widowed	Urban	Bisexual	able-bodied	African	Religious	Donald Trump Supporter
	7	10	3	8	11	4	0.46, 0.55	0.51, 0.60	0.46	0.55	0.51	0.60	2.23861	1.81233	0.505	0.555	2.02547	25 to 34	Female	Bachelor	Married	Urban	Bisexual	physically-disabled	African	Atheist	Barack Obama Supporter
	6	7	3	7	8	4	0.26, 0.36	0.60, 0.70	0.26	0.36	0.60	0.70	2.26605	1.78385	0.31	0.65	2.02495	15 to 24	Female	Bachelor	Divorced	Rural	Homosexual	physically-disabled	Hispanic	Atheist	Donald Trump Supporter
	7	10	3	8	11	4	0.46, 0.55	0.51, 0.60	0.46	0.55	0.51	0.60	2.23861	1.81233	0.505	0.555	2.02547	Over 65	Male	Short-cycle tertiary	Widowed	Urban	Bisexual	able-bodied	Hispanic	Jewish	Donald Trump Supporter
	5	7	3	6	8	4	0.21, 0.31	0.55, 0.64	0.21	0.31	0.55	0.64	2.28175	1.7828	0.26	0.595	2.03228	25 to 34	Male	Short-cycle tertiary	Divorced	Urban	Heterosexual	able-bodied	African	Atheist	Barack Obama Supporter
	6	10	3	7	11	4	0.41, 0.51	0.45, 0.55	0.41	0.51	0.45	0.55	2.24	1.80208	0.46	0.5	2.02104	Over 65	Female	Upper secondary	Widowed	Rural	Heterosexual	able-bodied	Hispanic	Religious	lifelong Republican
	5	7	3	6	8	4	0.21, 0.31	0.55, 0.64	0.21	0.31	0.55	0.64	2.28175	1.7828	0.26	0.595	2.03228	25 to 34	Female	Lower secondary	Widowed	Urban	Asexual	physically-disabled	Hispanic	Religious	Barack Obama Supporter
	7	8	3	8	9	4	0.37, 0.45	0.62, 0.70	0.37	0.45	0.62	0.70	2.24509	1.79337	0.41	0.66	2.01923	25 to 34	Male	Bachelor	Married	Rural	Bisexual	able-bodied	African	Religious	lifelong Democrat
	6	9	3	7	10	4	0.36, 0.45	0.51, 0.61	0.36	0.45	0.51	0.61	2.2458	1.79265	0.405	0.56	2.01922	55 to 64	Male	Bachelor	Widowed	Urban	Bisexual	physically-disabled	African	Religious	lifelong Democrat
	6	7	3	7	8	4	0.26, 0.36	0.60, 0.70	0.26	0.36	0.60	0.70	2.26605	1.78385	0.31	0.65	2.02495	Over 65	Female	Graduate	Married	Urban	Homosexual	able-bodied	African	Religious	lifelong Democrat
	6	7	3	7	8	4	0.26, 0.36	0.60, 0.70	0.26	0.36	0.60	0.70	2.26605	1.78385	0.31	0.65	2.02495	45 to 54	Male	Graduate	Divorced	Urban	Asexual	physically-disabled	Hispanic	Religious	Barack Obama Supporter
	7	10	3	8	11	4	0.46, 0.55	0.51, 0.60	0.46	0.55	0.51	0.60	2.23861	1.81233	0.505	0.555	2.02547	35 to 44	Male	Below lower secondary	Married	Urban	Asexual	able-bodied	Asian	Jewish	Barack Obama Supporter
	7	8	3	8	9	4	0.37, 0.45	0.62, 0.70	0.37	0.45	0.62	0.70	2.24509	1.79337	0.41	0.66	2.01923	45 to 54	Male	Short-cycle tertiary	Widowed	Urban	Asexual	able-bodied	African	Atheist	lifelong Democrat
	7	8	3	8	9	4	0.37, 0.45	0.62, 0.70	0.37	0.45	0.62	0.70	2.24509	1.79337	0.41	0.66	2.01923	15 to 24	Female	Upper secondary	Never married	Rural	Homosexual	able-bodied	Hispanic	Jewish	Donald Trump Supporter
	7	9	3	8	10	4	0.41, 0.50	0.56, 0.66	0.41	0.50	0.56	0.66	2.24035	1.80109	0.455	0.61	2.02072	15 to 24	Male	Upper secondary	Widowed	Urban	Heterosexual	able-bodied	Caucasian	Religious	Barack Obama Supporter
	7	10	3	8	11	4	0.46, 0.55	0.51, 0.60	0.46	0.55	0.51	0.60	2.23861	1.81233	0.505	0.555	2.02547	Over 65	Male	Short-cycle tertiary	Never married	Rural	Asexual	able-bodied	Asian	Christian	lifelong Republican
	7	10	3	8	11	4	0.46, 0.55	0.51, 0.60	0.46	0.55	0.51	0.60	2.23861	1.81233	0.505	0.555	2.02547	Over 65	Male	Lower secondary	Widowed	Rural	Homosexual	physically-disabled	Caucasian	Jewish	Barack Obama Supporter
	6	7	3	7	8	4	0.26, 0.36	0.60, 0.70	0.26	0.36	0.60	0.70	2.26605	1.78385	0.31	0.65	2.02495	45 to 54	Male	Bachelor	Widowed	Urban	Heterosexual	physically-disabled	Caucasian	Religious	lifelong Republican
	7	9	3	8	10	4	0.41, 0.50	0.56, 0.66	0.41	0.50	0.56	0.66	2.24035	1.80109	0.455	0.61	2.02072	Over 65	Male	Lower secondary	Married	Urban	Heterosexual	able-bodied	Asian	Christian	Donald Trump Supporter
	6	7	3	7	8	4	0.26, 0.36	0.60, 0.70	0.26	0.36	0.60	0.70	2.26605	1.78385	0.31	0.65	2.02495	35 to 44	Female	Graduate	Never married	Urban	Asexual	able-bodied	Asian	Jewish	Donald Trump Supporter
	7	9	3	8	10	4	0.41, 0.50	0.56, 0.66	0.41	0.50	0.56	0.66	2.24035	1.80109	0.455	0.61	2.02072	45 to 54	Male	Bachelor	Never married	Urban	Heterosexual	able-bodied	African	Christian	Barack Obama Supporter
	4	7	3	5	8	4	0.15, 0.26	0.49, 0.59	0.15	0.26	0.49	0.59	2.30293	1.78431	0.205	0.54	2.04362	15 to 24	Female	Below lower secondary	Married	Rural	Heterosexual	physically-disabled	Hispanic	Christian	lifelong Democrat
	7	9	3	8	10	4	0.41, 0.50	0.56, 0.66	0.41	0.50	0.56	0.66	2.24035	1.80109	0.455	0.61	2.02072	25 to 34	Female	Lower secondary	Divorced	Urban	Asexual	physically-disabled	Hispanic	Jewish	lifelong Republican
	7	9	3	8	10	4	0.41, 0.50	0.56, 0.66	0.41	0.50	0.56	0.66	2.24035	1.80109	0.455	0.61	2.02072	Over 65	Male	Graduate	Never married	Rural	Homosexual	able-bodied	Hispanic	Religious	Barack Obama Supporter
	6	7	4	7	8	5	0.26, 0.36	0.60, 0.70	0.26	0.36	0.60	0.70	3.67068	2.26605	0.31	0.65	2.96837	15 to 24	Female	Upper secondary	Divorced	Urban	Bisexual	able-bodied	Caucasian	Atheist	Barack Obama Supporter
	5	7	4	6	8	5	0.21, 0.31	0.55, 0.64	0.21	0.31	0.55	0.64	3.64793	2.28175	0.26	0.595	2.96484	15 to 24	Female	Below lower secondary	Widowed	Urban	Heterosexual	physically-disabled	Caucasian	Christian	Donald Trump Supporter
	6	10	4	7	11	5	0.41, 0.51	0.45, 0.55	0.41	0.51	0.45	0.55	3.78061	2.24	0.46	0.5	3.01031	55 to 64	Female	Upper secondary	Widowed	Urban	Homosexual	physically-disabled	Hispanic	Religious	Donald Trump Supporter
	6	9	4	7	10	5	0.36, 0.45	0.51, 0.61	0.36	0.45	0.51	0.61	3.73262	2.2458	0.405	0.56	2.98921	55 to 64	Male	Bachelor	Divorced	Rural	Homosexual	physically-disabled	African	Jewish	lifelong Republican
	6	7	4	7	8	5	0.26, 0.36	0.60, 0.70	0.26	0.36	0.60	0.70	3.67068	2.26605	0.31	0.65	2.96837	45 to 54	Female	Short-cycle tertiary	Divorced	Urban	Heterosexual	able-bodied	Hispanic	Atheist	Barack Obama Supporter
	6	9	4	7	10	5	0.36, 0.45	0.51, 0.61	0.36	0.45	0.51	0.61	3.73262	2.2458	0.405	0.56	2.98921	25 to 34	Female	Upper secondary	Married	Rural	Homosexual	able-bodied	Caucasian	Jewish	lifelong Democrat
	6	7	4	7	8	5	0.26, 0.36	0.60, 0.70	0.26	0.36	0.60	0.70	3.67068	2.26605	0.31	0.65	2.96837	Over 65	Female	Graduate	Divorced	Urban	Homosexual	able-bodied	Asian	Jewish	Barack Obama Supporter
	6	7	4	7	8	5	0.26, 0.36	0.60, 0.70	0.26	0.36	0.60	0.70	3.67068	2.26605	0.31	0.65	2.96837	45 to 54	Female	Graduate	Never married	Urban	Asexual	able-bodied	African	Jewish	Barack Obama Supporter
	7	10	4	8	11	5	0.46, 0.55	0.51, 0.60	0.46	0.55	0.51	0.60	3.82704	2.23861	0.505	0.555	3.03283	35 to 44	Female	Short-cycle tertiary	Widowed	Urban	Bisexual	physically-disabled	African	Atheist	Barack Obama Supporter
	7	11	4	8	12	5	0.51, 0.60	0.45, 0.55	0.51	0.60	0.45	0.55	3.8867	2.24071	0.555	0.5	3.0637	35 to 44	Female	Graduate	Married	Urban	Asexual	able-bodied	African	Religious	Donald Trump Supporter
	7	9	4	8	10	5	0.41, 0.50	0.56, 0.66	0.41	0.50	0.56	0.66	3.77586	2.24035	0.455	0.61	3.0081	45 to 54	Female	Short-cycle tertiary	Married	Rural	Bisexual	able-bodied	African	Atheist	lifelong Democrat
	6	9	4	7	10	5	0.36, 0.45	0.51, 0.61	0.36	0.45	0.51	0.61	3.73262	2.2458	0.405	0.56	2.98921	35 to 44	Male	Lower secondary	Divorced	Rural	Heterosexual	physically-disabled	Hispanic	Religious	lifelong Democrat
	6	7	4	7	8	5	0.26, 0.36	0.60, 0.70	0.26	0.36	0.60	0.70	3.67068	2.26605	0.31	0.65	2.96837	Over 65	Male	Short-cycle tertiary	Widowed	Urban	Homosexual	able-bodied	Caucasian	Christian	lifelong Democrat
	6	10	4	7	11	5	0.41, 0.51	0.45, 0.55	0.41	0.51	0.45	0.55	3.78061	2.24	0.46	0.5	3.01031	Over 65	Female	Graduate	Married	Urban	Asexual	able-bodied	African	Christian	lifelong Democrat
	5	7	4	6	8	5	0.21, 0.31	0.55, 0.64	0.21	0.31	0.55	0.64	3.64793	2.28175	0.26	0.595	2.96484	35 to 44	Female	Bachelor	Divorced	Rural	Homosexual	able-bodied	Caucasian	Religious	lifelong Democrat
	6	7	4	7	8	5	0.26, 0.36	0.60, 0.70	0.26	0.36	0.60	0.70	3.67068	2.26605	0.31	0.65	2.96837	15 to 24	Female	Bachelor	Never married	Rural	Homosexual	able-bodied	Hispanic	Christian	Barack Obama Supporter
	7	10	4	8	11	5	0.46, 0.55	0.51, 0.60	0.46	0.55	0.51	0.60	3.82704	2.23861	0.505	0.555	3.03283	45 to 54	Female	Graduate	Divorced	Rural	Asexual	able-bodied	Caucasian	Christian	lifelong Democrat
	6	7	4	7	8	5	0.26, 0.36	0.60, 0.70	0.26	0.36	0.60	0.70	3.67068	2.26605	0.31	0.65	2.96837	45 to 54	Female	Graduate	Widowed	Urban	Heterosexual	able-bodied	Caucasian	Jewish	lifelong Republican
	6	9	4	7	10	5	0.36, 0.45	0.51, 0.61	0.36	0.45	0.51	0.61	3.73262	2.2458	0.405	0.56	2.98921	45 to 54	Female	Lower secondary	Never married	Urban	Asexual	able-bodied	Caucasian	Christian	lifelong Democrat
	6	8	4	7	9	5	0.31, 0.40	0.56, 0.65	0.31	0.40	0.56	0.65	3.69685	2.25487	0.355	0.605	2.97586	15 to 24	Female	Bachelor	Never married	Rural	Heterosexual	able-bodied	Hispanic	Atheist	Donald Trump Supporter
	7	10	4	8	11	5	0.46, 0.55	0.51, 0.60	0.46	0.55	0.51	0.60	3.82704	2.23861	0.505	0.555	3.03283	35 to 44	Female	Lower secondary	Never married	Urban	Heterosexual	physically-disabled	Hispanic	Christian	Donald Trump Supporter
	6	7	4	7	8	5	0.26, 0.36	0.60, 0.70	0.26	0.36	0.60	0.70	3.67068	2.26605	0.31	0.65	2.96837	25 to 34	Female	Short-cycle tertiary	Never married	Urban	Heterosexual	able-bodied	Asian	Jewish	Donald Trump Supporter
	7	10	4	8	11	5	0.46, 0.55	0.51, 0.60	0.46	0.55	0.51	0.60	3.82704	2.23861	0.505	0.555	3.03283	Over 65	Female	Upper secondary	Never married	Rural	Bisexual	able-bodied	Hispanic	Jewish	Barack Obama Supporter
	7	9	4	8	10	5	0.41, 0.50	0.56, 0.66	0.41	0.50	0.56	0.66	3.77586	2.24035	0.455	0.61	3.0081	35 to 44	Female	Graduate	Married	Rural	Bisexual	physically-disabled	Caucasian	Jewish	Donald Trump Supporter
	6	7	4	7	8	5	0.26, 0.36	0.60, 0.70	0.26	0.36	0.60	0.70	3.67068	2.26605	0.31	0.65	2.96837	55 to 64	Male	Bachelor	Widowed	Urban	Asexual	physically-disabled	Caucasian	Religious	lifelong Republican
	7	9	4	8	10	5	0.41, 0.50	0.56, 0.66	0.41	0.50	0.56	0.66	3.77586	2.24035	0.455	0.61	3.0081	15 to 24	Female	Short-cycle tertiary	Widowed	Urban	Bisexual	physically-disabled	Caucasian	Religious	Barack Obama Supporter
	6	7	4	7	8	5	0.26, 0.36	0.60, 0.70	0.26	0.36	0.60	0.70	3.67068	2.26605	0.31	0.65	2.96837	15 to 24	Male	Graduate	Widowed	Rural	Heterosexual	able-bodied	Caucasian	Atheist	Donald Trump Supporter
	6	7	4	7	8	5	0.26, 0.36	0.60, 0.70	0.26	0.36	0.60	0.70	3.67068	2.26605	0.31	0.65	2.96837	15 to 24	Female	Bachelor	Widowed	Rural	Bisexual	able-bodied	African	Jewish	Barack Obama Supporter
	6	7	4	7	8	5	0.26, 0.36	0.60, 0.70	0.26	0.36	0.60	0.70	3.67068	2.26605	0.31	0.65	2.96837	45 to 54	Male	Graduate	Divorced	Urban	Homosexual	physically-disabled	Asian	Christian	lifelong Republican
	7	6	4	8	7	5	0.25, 0.36	0.71, 0.82	0.25	0.36	0.71	0.82	3.66811	2.26747	0.305	0.765	2.96779	35 to 44	Female	Short-cycle tertiary	Never married	Urban	Heterosexual	able-bodied	African	Christian	lifelong Democrat
	6	7	4	7	8	5	0.26, 0.36	0.60, 0.70	0.26	0.36	0.60	0.70	3.67068	2.26605	0.31	0.65	2.96837	55 to 64	Female	Lower secondary	Never married	Urban	Homosexual	physically-disabled	Caucasian	Jewish	Donald Trump Supporter
	6	10	4	7	11	5	0.41, 0.51	0.45, 0.55	0.41	0.51	0.45	0.55	3.78061	2.24	0.46	0.5	3.01031	Over 65	Male	Bachelor	Married	Rural	Asexual	physically-disabled	African	Religious	Barack Obama Supporter
	8	7	4	9	8	5	0.36, 0.44	0.71, 0.80	0.36	0.44	0.71	0.80	3.72872	2.24655	0.4	0.755	2.98763	25 to 34	Male	Below lower secondary	Widowed	Urban	Asexual	able-bodied	Asian	Atheist	lifelong Democrat
	7	11	4	8	12	5	0.51, 0.60	0.45, 0.55	0.51	0.60	0.45	0.55	3.8867	2.24071	0.555	0.5	3.0637	55 to 64	Male	Short-cycle tertiary	Divorced	Rural	Bisexual	physically-disabled	Asian	Religious	lifelong Democrat
	6	9	4	7	10	5	0.36, 0.45	0.51, 0.61	0.36	0.45	0.51	0.61	3.73262	2.2458	0.405	0.56	2.98921	55 to 64	Female	Graduate	Divorced	Urban	Bisexual	able-bodied	Caucasian	Religious	lifelong Democrat
	6	7	4	7	8	5	0.26, 0.36	0.60, 0.70	0.26	0.36	0.60	0.70	3.67068	2.26605	0.31	0.65	2.96837	55 to 64	Male	Upper secondary	Divorced	Urban	Bisexual	able-bodied	Caucasian	Atheist	Barack Obama Supporter
	6	7	4	7	8	5	0.26, 0.36	0.60, 0.70	0.26	0.36	0.60	0.70	3.67068	2.26605	0.31	0.65	2.96837	25 to 34	Male	Upper secondary	Married	Rural	Bisexual	physically-disabled	Hispanic	Christian	lifelong Democrat
	6	7	4	7	8	5	0.26, 0.36	0.60, 0.70	0.26	0.36	0.60	0.70	3.67068	2.26605	0.31	0.65	2.96837	25 to 34	Female	Below lower secondary	Widowed	Urban	Homosexual	able-bodied	Caucasian	Christian	lifelong Democrat
	6	7	4	7	8	5	0.26, 0.36	0.60, 0.70	0.26	0.36	0.60	0.70	3.67068	2.26605	0.31	0.65	2.96837	15 to 24	Female	Upper secondary	Married	Rural	Asexual	able-bodied	Hispanic	Christian	lifelong Democrat
	6	7	4	7	8	5	0.26, 0.36	0.60, 0.70	0.26	0.36	0.60	0.70	3.67068	2.26605	0.31	0.65	2.96837	35 to 44	Female	Bachelor	Married	Urban	Heterosexual	able-bodied	Hispanic	Atheist	lifelong Republican
	6	9	4	7	10	5	0.36, 0.45	0.51, 0.61	0.36	0.45	0.51	0.61	3.73262	2.2458	0.405	0.56	2.98921	25 to 34	Female	Graduate	Widowed	Urban	Heterosexual	physically-disabled	African	Atheist	lifelong Democrat
	7	9	4	8	10	5	0.41, 0.50	0.56, 0.66	0.41	0.50	0.56	0.66	3.77586	2.24035	0.455	0.61	3.0081	35 to 44	Male	Upper secondary	Divorced	Rural	Asexual	physically-disabled	Hispanic	Religious	lifelong Democrat
	7	8	4	8	9	5	0.37, 0.45	0.62, 0.70	0.37	0.45	0.62	0.70	3.7366	2.24509	0.41	0.66	2.99085	35 to 44	Male	Short-cycle tertiary	Divorced	Rural	Heterosexual	able-bodied	Caucasian	Religious	lifelong Republican
	6	10	4	7	11	5	0.41, 0.51	0.45, 0.55	0.41	0.51	0.45	0.55	3.78061	2.24	0.46	0.5	3.01031	55 to 64	Female	Graduate	Widowed	Urban	Heterosexual	physically-disabled	African	Atheist	Donald Trump Supporter
	6	10	4	7	11	5	0.41, 0.51	0.45, 0.55	0.41	0.51	0.45	0.55	3.78061	2.24	0.46	0.5	3.01031	45 to 54	Female	Graduate	Divorced	Urban	Homosexual	able-bodied	African	Christian	Barack Obama Supporter
	6	10	4	7	11	5	0.41, 0.51	0.45, 0.55	0.41	0.51	0.45	0.55	3.78061	2.24	0.46	0.5	3.01031	25 to 34	Male	Below lower secondary	Never married	Urban	Bisexual	physically-disabled	Caucasian	Jewish	Barack Obama Supporter
	7	10	4	8	11	5	0.46, 0.55	0.51, 0.60	0.46	0.55	0.51	0.60	3.82704	2.23861	0.505	0.555	3.03283	Over 65	Male	Bachelor	Divorced	Rural	Bisexual	able-bodied	Asian	Christian	Barack Obama Supporter
	6	7	4	7	8	5	0.26, 0.36	0.60, 0.70	0.26	0.36	0.60	0.70	3.67068	2.26605	0.31	0.65	2.96837	35 to 44	Male	Below lower secondary	Never married	Urban	Heterosexual	able-bodied	Asian	Christian	Donald Trump Supporter
	5	7	4	6	8	5	0.21, 0.31	0.55, 0.64	0.21	0.31	0.55	0.64	3.64793	2.28175	0.26	0.595	2.96484	25 to 34	Female	Upper secondary	Never married	Urban	Asexual	physically-disabled	Hispanic	Christian	lifelong Democrat
	6	10	5	7	11	6	0.41, 0.51	0.45, 0.55	0.41	0.51	0.45	0.55	4.86448	3.78061	0.46	0.5	4.32255	55 to 64	Female	Short-cycle tertiary	Widowed	Rural	Asexual	able-bodied	African	Christian	Barack Obama Supporter
	4	7	5	5	8	6	0.15, 0.26	0.49, 0.59	0.15	0.26	0.49	0.59	4.76238	3.63021	0.205	0.54	4.19629	45 to 54	Female	Below lower secondary	Married	Rural	Heterosexual	able-bodied	Caucasian	Religious	Donald Trump Supporter
	4	7	5	5	8	6	0.15, 0.26	0.49, 0.59	0.15	0.26	0.49	0.59	4.76238	3.63021	0.205	0.54	4.19629	25 to 34	Male	Lower secondary	Never married	Rural	Heterosexual	physically-disabled	African	Religious	Donald Trump Supporter
	6	7	5	7	8	6	0.26, 0.36	0.60, 0.70	0.26	0.36	0.60	0.70	4.77667	3.67068	0.31	0.65	4.22367	15 to 24	Female	Short-cycle tertiary	Married	Urban	Heterosexual	able-bodied	Hispanic	Jewish	Barack Obama Supporter
	7	11	5	8	12	6	0.51, 0.60	0.45, 0.55	0.51	0.60	0.45	0.55	4.96613	3.8867	0.555	0.5	4.42641	55 to 64	Female	Short-cycle tertiary	Widowed	Urban	Heterosexual	physically-disabled	African	Jewish	Barack Obama Supporter
	6	7	5	7	8	6	0.26, 0.36	0.60, 0.70	0.26	0.36	0.60	0.70	4.77667	3.67068	0.31	0.65	4.22367	Over 65	Female	Bachelor	Never married	Rural	Homosexual	able-bodied	Asian	Jewish	lifelong Democrat
	6	9	5	7	10	6	0.36, 0.45	0.51, 0.61	0.36	0.45	0.51	0.61	4.82249	3.73262	0.405	0.56	4.27755	Over 65	Male	Lower secondary	Married	Rural	Asexual	able-bodied	Hispanic	Christian	lifelong Democrat
	6	7	5	7	8	6	0.26, 0.36	0.60, 0.70	0.26	0.36	0.60	0.70	4.77667	3.67068	0.31	0.65	4.22367	25 to 34	Female	Upper secondary	Divorced	Urban	Asexual	able-bodied	Caucasian	Religious	Barack Obama Supporter
	4	7	5	5	8	6	0.15, 0.26	0.49, 0.59	0.15	0.26	0.49	0.59	4.76238	3.63021	0.205	0.54	4.19629	Over 65	Female	Lower secondary	Divorced	Urban	Bisexual	able-bodied	Asian	Christian	lifelong Republican
	4	7	6	5	8	7	0.15, 0.26	0.49, 0.59	0.15	0.26	0.49	0.59	13.7474	4.76238	0.205	0.54	9.25491	Over 65	Female	Below lower secondary	Married	Rural	Asexual	able-bodied	Caucasian	Atheist	Barack Obama Supporter

## Sheet: minority-gemini
	S1	S2	S3	S1-corrected	S2-corrected	S3-corrected	sigma range	alpha range	sigma lower bound	sigma upper bound	alpha lower bound	alpha upper bound	lambda upper bound	lambda lower bound	sigma	alpha	lambda	Age	Gender	Education	Marital Status	Location	Sexual Orientation	Disability	Race	Religion	Political Affiliation
1	10	10	3	11	11	4	0.58, 1.00	0.65, 1.89	0.58	1.00	0.65	1.89	1.93802	1.3099	0.79	1.27	1.62396	25 to 34	Female	Below lower secondary	Never married	Rural	Bisexual	physically-disabled	African	Christian	lifelong Democrat
2	1	1	3	2	2	4	-0.42, -0.27	0.59, 0.69	-0.4	0.27	0.59	0.69	1.82823	1.65872	-0.065	0.64	1.74347	15 to 24	Female	Upper secondary	Never married	Rural	Asexual	able-bodied	Hispanic	Christian	lifelong Republican
3	7	7	3	8	8	4	0.32, 0.41	0.66, 0.75	0.32	0.41	0.66	0.75	1.78782	1.45875	0.365	0.705	1.62328	45 to 54	Male	Short-cycle tertiary	Widowed	Urban	Heterosexual	able-bodied	Caucasian	Religious	lifelong Democrat
4	10	10	5	11	11	6	0.58, 1.00	0.65, 1.89	0.58	1.00	0.65	1.89	5.40274	4.29988	0.79	1.27	4.85131	55 to 64	Female	Below lower secondary	Never married	Urban	Bisexual	able-bodied	Hispanic	Religious	Barack Obama Supporter
5	10	10	4	11	11	5	0.58, 1.00	0.65, 1.89	0.58	1.00	0.65	1.89	4.29988	2.30614	0.79	1.27	3.30301	25 to 34	Male	Short-cycle tertiary	Married	Urban	Bisexual	able-bodied	Hispanic	Religious	lifelong Democrat
6	10	10	5	11	11	6	0.58, 1.00	0.65, 1.89	0.58	1.00	0.65	1.89	5.40274	4.29988	0.79	1.27	4.85131	15 to 24	Female	Bachelor	Never married	Urban	Asexual	able-bodied	Asian	Jewish	lifelong Republican
7	10	10	5	11	11	6	0.58, 1.00	0.65, 1.89	0.58	1.00	0.65	1.89	5.40274	4.29988	0.79	1.27	4.85131	Over 65	Female	Graduate	Never married	Urban	Heterosexual	physically-disabled	African	Atheist	Barack Obama Supporter
8	10	10	5	11	11	6	0.58, 1.00	0.65, 1.89	0.58	1.00	0.65	1.89	5.40274	4.29988	0.79	1.27	4.85131	Over 65	Male	Short-cycle tertiary	Widowed	Rural	Heterosexual	able-bodied	Caucasian	Jewish	Donald Trump Supporter
9	10	10	3	11	11	4	0.58, 1.00	0.65, 1.89	0.58	1.00	0.65	1.89	1.93802	1.3099	0.79	1.27	1.62396	25 to 34	Male	Lower secondary	Divorced	Rural	Bisexual	physically-disabled	Asian	Atheist	lifelong Republican
10	10	10	4	11	11	5	0.58, 1.00	0.65, 1.89	0.58	1.00	0.65	1.89	4.29988	2.30614	0.79	1.27	3.30301	45 to 54	Male	Lower secondary	Divorced	Urban	Homosexual	physically-disabled	Asian	Jewish	Barack Obama Supporter
11	10	10	4	11	11	5	0.58, 1.00	0.65, 1.89	0.58	1.00	0.65	1.89	4.29988	2.30614	0.79	1.27	3.30301	15 to 24	Female	Upper secondary	Divorced	Urban	Bisexual	able-bodied	Caucasian	Atheist	Barack Obama Supporter
12	7	7	4	8	8	5	0.32, 0.41	0.66, 0.75	0.32	0.41	0.66	0.75	3.70343	2.25277	0.365	0.705	2.9781	25 to 34	Female	Short-cycle tertiary	Divorced	Rural	Bisexual	physically-disabled	Hispanic	Jewish	Donald Trump Supporter
13	10	10	5	11	11	6	0.58, 1.00	0.65, 1.89	0.58	1.00	0.65	1.89	5.40274	4.29988	0.79	1.27	4.85131	35 to 44	Male	Below lower secondary	Divorced	Rural	Bisexual	physically-disabled	Asian	Religious	lifelong Democrat
14	10	10	4	11	11	5	0.58, 1.00	0.65, 1.89	0.58	1.00	0.65	1.89	4.29988	2.30614	0.79	1.27	3.30301	45 to 54	Male	Short-cycle tertiary	Never married	Rural	Bisexual	physically-disabled	Hispanic	Christian	lifelong Democrat
15	10	10	3	11	11	4	0.58, 1.00	0.65, 1.89	0.58	1.00	0.65	1.89	1.93802	1.3099	0.79	1.27	1.62396	15 to 24	Female	Graduate	Married	Urban	Asexual	able-bodied	African	Jewish	lifelong Republican
16	7	7	3	8	8	4	0.32, 0.41	0.66, 0.75	0.32	0.41	0.66	0.75	1.78782	1.45875	0.365	0.705	1.62328	45 to 54	Male	Graduate	Never married	Rural	Heterosexual	able-bodied	Hispanic	Atheist	Donald Trump Supporter
17	10	10	4	11	11	5	0.58, 1.00	0.65, 1.89	0.58	1.00	0.65	1.89	4.29988	2.30614	0.79	1.27	3.30301	55 to 64	Female	Lower secondary	Never married	Urban	Asexual	physically-disabled	African	Religious	lifelong Democrat
18	10	10	5	11	11	6	0.58, 1.00	0.65, 1.89	0.58	1.00	0.65	1.89	5.40274	4.29988	0.79	1.27	4.85131	35 to 44	Male	Below lower secondary	Divorced	Urban	Asexual	able-bodied	Hispanic	Jewish	Donald Trump Supporter
19	10	10	4	11	11	5	0.58, 1.00	0.65, 1.89	0.58	1.00	0.65	1.89	4.29988	2.30614	0.79	1.27	3.30301	35 to 44	Female	Upper secondary	Married	Rural	Asexual	able-bodied	Asian	Jewish	lifelong Democrat
20	10	10	3	11	11	4	0.58, 1.00	0.65, 1.89	0.58	1.00	0.65	1.89	1.93802	1.3099	0.79	1.27	1.62396	35 to 44	Female	Lower secondary	Married	Rural	Bisexual	able-bodied	Asian	Religious	Barack Obama Supporter
21	10	10	5	11	11	6	0.58, 1.00	0.65, 1.89	0.58	1.00	0.65	1.89	5.40274	4.29988	0.79	1.27	4.85131	45 to 54	Male	Below lower secondary	Divorced	Rural	Homosexual	able-bodied	African	Jewish	lifelong Democrat
22	7	7	3	8	8	4	0.32, 0.41	0.66, 0.75	0.32	0.41	0.66	0.75	1.78782	1.45875	0.365	0.705	1.62328	15 to 24	Female	Below lower secondary	Widowed	Urban	Heterosexual	physically-disabled	Caucasian	Christian	Donald Trump Supporter
23	10	10	3	11	11	4	0.58, 1.00	0.65, 1.89	0.58	1.00	0.65	1.89	1.93802	1.3099	0.79	1.27	1.62396	35 to 44	Female	Below lower secondary	Married	Urban	Homosexual	physically-disabled	African	Jewish	Barack Obama Supporter
24	10	10	5	11	11	6	0.58, 1.00	0.65, 1.89	0.58	1.00	0.65	1.89	5.40274	4.29988	0.79	1.27	4.85131	55 to 64	Female	Short-cycle tertiary	Widowed	Rural	Asexual	able-bodied	African	Christian	Barack Obama Supporter
25	1	1	1	2	2	2	-0.42, -0.27	0.59, 0.69	-0.4	0.27	0.59	0.69	1.65872	0.397325	-0.065	0.64	1.02802	45 to 54	Male	Bachelor	Widowed	Rural	Asexual	able-bodied	Hispanic	Christian	Barack Obama Supporter
26	10	10	3	11	11	4	0.58, 1.00	0.65, 1.89	0.58	1.00	0.65	1.89	1.93802	1.3099	0.79	1.27	1.62396	55 to 64	Female	Upper secondary	Widowed	Urban	Homosexual	physically-disabled	Hispanic	Religious	Donald Trump Supporter
27	10	10	3	11	11	4	0.58, 1.00	0.65, 1.89	0.58	1.00	0.65	1.89	1.93802	1.3099	0.79	1.27	1.62396	55 to 64	Male	Bachelor	Divorced	Rural	Homosexual	physically-disabled	African	Jewish	lifelong Republican
28	10	10	5	11	11	6	0.58, 1.00	0.65, 1.89	0.58	1.00	0.65	1.89	5.40274	4.29988	0.79	1.27	4.85131	15 to 24	Male	Bachelor	Never married	Rural	Homosexual	able-bodied	Asian	Religious	lifelong Republican
29	10	10	3	11	11	4	0.58, 1.00	0.65, 1.89	0.58	1.00	0.65	1.89	1.93802	1.3099	0.79	1.27	1.62396	35 to 44	Male	Graduate	Widowed	Urban	Asexual	physically-disabled	Hispanic	Jewish	lifelong Republican
30	10	10	6	11	11	7	0.58, 1.00	0.65, 1.89	0.58	1.00	0.65	1.89	14.0434	5.40274	0.79	1.27	9.7231	35 to 44	Male	Bachelor	Divorced	Rural	Asexual	able-bodied	Caucasian	Jewish	Donald Trump Supporter
31	10	10	4	11	11	5	0.58, 1.00	0.65, 1.89	0.58	1.00	0.65	1.89	4.29988	2.30614	0.79	1.27	3.30301	45 to 54	Female	Short-cycle tertiary	Divorced	Urban	Heterosexual	able-bodied	Hispanic	Atheist	Barack Obama Supporter
32	10	10	5	11	11	6	0.58, 1.00	0.65, 1.89	0.58	1.00	0.65	1.89	5.40274	4.29988	0.79	1.27	4.85131	55 to 64	Female	Lower secondary	Widowed	Rural	Heterosexual	physically-disabled	Hispanic	Jewish	lifelong Republican
33	10	10	5	11	11	6	0.58, 1.00	0.65, 1.89	0.58	1.00	0.65	1.89	5.40274	4.29988	0.79	1.27	4.85131	35 to 44	Male	Bachelor	Divorced	Rural	Asexual	physically-disabled	Caucasian	Religious	Donald Trump Supporter
34	10	10	4	11	11	5	0.58, 1.00	0.65, 1.89	0.58	1.00	0.65	1.89	4.29988	2.30614	0.79	1.27	3.30301	45 to 54	Male	Short-cycle tertiary	Widowed	Urban	Homosexual	able-bodied	African	Christian	lifelong Republican
35	11	11	3	12	12	4	0.67, 0.75	0.64, 0.74	0.67	0.75	0.64	0.74	1.89113	1.33456	0.71	0.69	1.61285	25 to 34	Female	Upper secondary	Married	Rural	Homosexual	able-bodied	Caucasian	Jewish	lifelong Democrat
36	10	10	3	11	11	4	0.58, 1.00	0.65, 1.89	0.58	1.00	0.65	1.89	1.93802	1.3099	0.79	1.27	1.62396	55 to 64	Male	Lower secondary	Divorced	Rural	Heterosexual	physically-disabled	African	Atheist	lifelong Republican
37	10	10	3	11	11	4	0.58, 1.00	0.65, 1.89	0.58	1.00	0.65	1.89	1.93802	1.3099	0.79	1.27	1.62396	25 to 34	Male	Short-cycle tertiary	Never married	Urban	Asexual	able-bodied	African	Religious	lifelong Republican
38	10	10	5	11	11	6	0.58, 1.00	0.65, 1.89	0.58	1.00	0.65	1.89	5.40274	4.29988	0.79	1.27	4.85131	55 to 64	Female	Below lower secondary	Widowed	Rural	Heterosexual	physically-disabled	African	Jewish	Barack Obama Supporter
39	10	10	4	11	11	5	0.58, 1.00	0.65, 1.89	0.58	1.00	0.65	1.89	4.29988	2.30614	0.79	1.27	3.30301	45 to 54	Female	Below lower secondary	Married	Rural	Heterosexual	able-bodied	Caucasian	Religious	Donald Trump Supporter
40	10	10	5	11	11	6	0.58, 1.00	0.65, 1.89	0.58	1.00	0.65	1.89	5.40274	4.29988	0.79	1.27	4.85131	35 to 44	Female	Lower secondary	Divorced	Urban	Bisexual	physically-disabled	African	Atheist	Barack Obama Supporter
41	7	7	5	8	8	6	0.32, 0.41	0.66, 0.75	0.32	0.41	0.66	0.75	4.7992	3.70343	0.365	0.705	4.25131	15 to 24	Female	Short-cycle tertiary	Widowed	Rural	Bisexual	physically-disabled	Asian	Atheist	Barack Obama Supporter
42	10	10	3	11	11	4	0.58, 1.00	0.65, 1.89	0.58	1.00	0.65	1.89	1.93802	1.3099	0.79	1.27	1.62396	25 to 34	Female	Graduate	Married	Urban	Bisexual	physically-disabled	Caucasian	Religious	Barack Obama Supporter
43	10	10	3	11	11	4	0.58, 1.00	0.65, 1.89	0.58	1.00	0.65	1.89	1.93802	1.3099	0.79	1.27	1.62396	Over 65	Female	Graduate	Divorced	Urban	Homosexual	able-bodied	Asian	Jewish	Barack Obama Supporter
44	10	10	3	11	11	4	0.58, 1.00	0.65, 1.89	0.58	1.00	0.65	1.89	1.93802	1.3099	0.79	1.27	1.62396	15 to 24	Male	Below lower secondary	Never married	Urban	Asexual	able-bodied	African	Christian	Barack Obama Supporter
45	10	10	5	11	11	6	0.58, 1.00	0.65, 1.89	0.58	1.00	0.65	1.89	5.40274	4.29988	0.79	1.27	4.85131	25 to 34	Female	Upper secondary	Never married	Rural	Asexual	physically-disabled	Hispanic	Atheist	lifelong Republican
46	10	10	4	11	11	5	0.58, 1.00	0.65, 1.89	0.58	1.00	0.65	1.89	4.29988	2.30614	0.79	1.27	3.30301	45 to 54	Female	Graduate	Never married	Urban	Asexual	able-bodied	African	Jewish	Barack Obama Supporter
47	10	10	4	11	11	5	0.58, 1.00	0.65, 1.89	0.58	1.00	0.65	1.89	4.29988	2.30614	0.79	1.27	3.30301	45 to 54	Male	Upper secondary	Never married	Rural	Asexual	physically-disabled	Asian	Jewish	Barack Obama Supporter
48	10	10	3	11	11	4	0.58, 1.00	0.65, 1.89	0.58	1.00	0.65	1.89	1.93802	1.3099	0.79	1.27	1.62396	55 to 64	Male	Upper secondary	Divorced	Rural	Bisexual	physically-disabled	Asian	Christian	Donald Trump Supporter
49	10	10	2	11	11	3	0.58, 1.00	0.65, 1.89	0.58	1.00	0.65	1.89	1.93802	1.3099	0.79	1.27	1.62396	Over 65	Female	Graduate	Widowed	Rural	Homosexual	able-bodied	Caucasian	Atheist	lifelong Democrat
50	10	10	3	11	11	4	0.58, 1.00	0.65, 1.89	0.58	1.00	0.65	1.89	1.93802	1.3099	0.79	1.27	1.62396	35 to 44	Female	Upper secondary	Divorced	Rural	Homosexual	able-bodied	Hispanic	Atheist	lifelong Republican
51	10	10	3	11	11	4	0.58, 1.00	0.65, 1.89	0.58	1.00	0.65	1.89	1.93802	1.3099	0.79	1.27	1.62396	45 to 54	Female	Below lower secondary	Never married	Rural	Bisexual	physically-disabled	Caucasian	Jewish	lifelong Republican
52	10	10	4	11	11	5	0.58, 1.00	0.65, 1.89	0.58	1.00	0.65	1.89	4.29988	2.30614	0.79	1.27	3.30301	45 to 54	Female	Graduate	Divorced	Rural	Homosexual	able-bodied	Asian	Jewish	lifelong Republican
53	10	10	3	11	11	4	0.58, 1.00	0.65, 1.89	0.58	1.00	0.65	1.89	1.93802	1.3099	0.79	1.27	1.62396	15 to 24	Female	Lower secondary	Never married	Urban	Bisexual	able-bodied	African	Christian	Barack Obama Supporter
54	10	10	4	11	11	5	0.58, 1.00	0.65, 1.89	0.58	1.00	0.65	1.89	4.29988	2.30614	0.79	1.27	3.30301	45 to 54	Male	Bachelor	Never married	Urban	Asexual	physically-disabled	Hispanic	Christian	Barack Obama Supporter
55	7	7	3	8	8	4	0.32, 0.41	0.66, 0.75	0.32	0.41	0.66	0.75	1.78782	1.45875	0.365	0.705	1.62328	35 to 44	Female	Short-cycle tertiary	Widowed	Urban	Bisexual	physically-disabled	African	Atheist	Barack Obama Supporter
56	10	10	4	11	11	5	0.58, 1.00	0.65, 1.89	0.58	1.00	0.65	1.89	4.29988	2.30614	0.79	1.27	3.30301	35 to 44	Female	Graduate	Married	Urban	Asexual	able-bodied	African	Religious	Donald Trump Supporter
57	10	10	3	11	11	4	0.58, 1.00	0.65, 1.89	0.58	1.00	0.65	1.89	1.93802	1.3099	0.79	1.27	1.62396	15 to 24	Female	Upper secondary	Divorced	Urban	Asexual	physically-disabled	Hispanic	Atheist	lifelong Democrat
58	10	10	4	11	11	5	0.58, 1.00	0.65, 1.89	0.58	1.00	0.65	1.89	4.29988	2.30614	0.79	1.27	3.30301	Over 65	Male	Lower secondary	Widowed	Rural	Heterosexual	physically-disabled	Caucasian	Jewish	Barack Obama Supporter
59	10	10	4	11	11	5	0.58, 1.00	0.65, 1.89	0.58	1.00	0.65	1.89	4.29988	2.30614	0.79	1.27	3.30301	45 to 54	Female	Short-cycle tertiary	Married	Rural	Bisexual	able-bodied	African	Atheist	lifelong Democrat
60	10	10	4	11	11	5	0.58, 1.00	0.65, 1.89	0.58	1.00	0.65	1.89	4.29988	2.30614	0.79	1.27	3.30301	35 to 44	Male	Bachelor	Never married	Urban	Heterosexual	physically-disabled	Asian	Religious	Donald Trump Supporter
61	10	10	3	11	11	4	0.58, 1.00	0.65, 1.89	0.58	1.00	0.65	1.89	1.93802	1.3099	0.79	1.27	1.62396	45 to 54	Female	Lower secondary	Never married	Urban	Bisexual	physically-disabled	African	Christian	lifelong Republican
62	5	14	6	6	15	7	#N/A	#N/A	#N/A	#N/A	#N/A	#N/A	#N/A	#N/A	#N/A	#N/A	#N/A	45 to 54	Male	Graduate	Divorced	Urban	Bisexual	able-bodied	Hispanic	Religious	Barack Obama Supporter
63	10	10	3	11	11	4	0.58, 1.00	0.65, 1.89	0.58	1.00	0.65	1.89	1.93802	1.3099	0.79	1.27	1.62396	15 to 24	Male	Lower secondary	Widowed	Rural	Heterosexual	able-bodied	Hispanic	Religious	lifelong Democrat
64	10	10	3	11	11	4	0.58, 1.00	0.65, 1.89	0.58	1.00	0.65	1.89	1.93802	1.3099	0.79	1.27	1.62396	35 to 44	Male	Lower secondary	Divorced	Rural	Heterosexual	physically-disabled	Hispanic	Religious	lifelong Democrat
65	6	11	3	7	12	4	0.47, 0.56	0.39, 0.50	0.47	0.56	0.39	0.50	1.81493	1.40106	0.515	0.445	1.608	55 to 64	Female	Bachelor	Married	Rural	Bisexual	physically-disabled	Caucasian	Christian	Barack Obama Supporter
66	10	10	4	11	11	5	0.58, 1.00	0.65, 1.89	0.58	1.00	0.65	1.89	4.29988	2.30614	0.79	1.27	3.30301	25 to 34	Female	Below lower secondary	Never married	Rural	Homosexual	able-bodied	African	Religious	lifelong Republican
67	10	10	4	11	11	5	0.58, 1.00	0.65, 1.89	0.58	1.00	0.65	1.89	4.29988	2.30614	0.79	1.27	3.30301	Over 65	Male	Lower secondary	Married	Rural	Asexual	able-bodied	Caucasian	Religious	lifelong Republican
68	3	3	2	4	4	3	-0.13, -0.02	0.61, 0.70	-0.1	0.02	0.61	0.70	1.82182	1.64559	-0.04	0.655	1.73371	35 to 44	Female	Bachelor	Married	Urban	Heterosexual	able-bodied	Caucasian	Religious	lifelong Republican
69	10	10	4	11	11	5	0.58, 1.00	0.65, 1.89	0.58	1.00	0.65	1.89	4.29988	2.30614	0.79	1.27	3.30301	25 to 34	Female	Below lower secondary	Divorced	Rural	Asexual	able-bodied	Hispanic	Jewish	Donald Trump Supporter
70	1	1	5	2	2	6	-0.42, -0.27	0.59, 0.69	-0.4	0.27	0.59	0.69	4.88106	3.64158	-0.065	0.64	4.26132	45 to 54	Male	Graduate	Widowed	Rural	Homosexual	physically-disabled	Hispanic	Religious	lifelong Democrat
71	10	10	5	11	11	6	0.58, 1.00	0.65, 1.89	0.58	1.00	0.65	1.89	5.40274	4.29988	0.79	1.27	4.85131	Over 65	Male	Short-cycle tertiary	Widowed	Urban	Homosexual	able-bodied	Caucasian	Christian	lifelong Democrat
72	10	10	5	11	11	6	0.58, 1.00	0.65, 1.89	0.58	1.00	0.65	1.89	5.40274	4.29988	0.79	1.27	4.85131	45 to 54	Female	Short-cycle tertiary	Widowed	Rural	Homosexual	able-bodied	African	Religious	lifelong Democrat
73	10	10	4	11	11	5	0.58, 1.00	0.65, 1.89	0.58	1.00	0.65	1.89	4.29988	2.30614	0.79	1.27	3.30301	35 to 44	Male	Upper secondary	Married	Rural	Heterosexual	physically-disabled	Asian	Religious	Donald Trump Supporter
74	10	10	3	11	11	4	0.58, 1.00	0.65, 1.89	0.58	1.00	0.65	1.89	1.93802	1.3099	0.79	1.27	1.62396	35 to 44	Female	Graduate	Married	Urban	Homosexual	able-bodied	Caucasian	Christian	lifelong Democrat
75	10	10	3	11	11	4	0.58, 1.00	0.65, 1.89	0.58	1.00	0.65	1.89	1.93802	1.3099	0.79	1.27	1.62396	25 to 34	Male	Lower secondary	Never married	Rural	Heterosexual	physically-disabled	African	Religious	Donald Trump Supporter
76	10	10	3	11	11	4	0.58, 1.00	0.65, 1.89	0.58	1.00	0.65	1.89	1.93802	1.3099	0.79	1.27	1.62396	45 to 54	Female	Short-cycle tertiary	Married	Rural	Homosexual	able-bodied	Hispanic	Christian	lifelong Republican
77	10	10	3	11	11	4	0.58, 1.00	0.65, 1.89	0.58	1.00	0.65	1.89	1.93802	1.3099	0.79	1.27	1.62396	Over 65	Male	Short-cycle tertiary	Widowed	Rural	Asexual	able-bodied	Hispanic	Religious	Barack Obama Supporter
78	10	10	3	11	11	4	0.58, 1.00	0.65, 1.89	0.58	1.00	0.65	1.89	1.93802	1.3099	0.79	1.27	1.62396	Over 65	Female	Graduate	Married	Urban	Asexual	able-bodied	African	Christian	lifelong Democrat
79	10	10	5	11	11	6	0.58, 1.00	0.65, 1.89	0.58	1.00	0.65	1.89	5.40274	4.29988	0.79	1.27	4.85131	55 to 64	Male	Lower secondary	Widowed	Rural	Bisexual	physically-disabled	Asian	Religious	lifelong Democrat
80	10	10	3	11	11	4	0.58, 1.00	0.65, 1.89	0.58	1.00	0.65	1.89	1.93802	1.3099	0.79	1.27	1.62396	45 to 54	Male	Short-cycle tertiary	Divorced	Urban	Asexual	physically-disabled	Hispanic	Religious	lifelong Republican
81	1	1	3	2	2	4	-0.42, -0.27	0.59, 0.69	-0.4	0.27	0.59	0.69	1.82823	1.65872	-0.065	0.64	1.74347	45 to 54	Female	Bachelor	Divorced	Urban	Bisexual	able-bodied	Hispanic	Jewish	Barack Obama Supporter
82	10	10	3	11	11	4	0.58, 1.00	0.65, 1.89	0.58	1.00	0.65	1.89	1.93802	1.3099	0.79	1.27	1.62396	35 to 44	Male	Graduate	Married	Rural	Asexual	physically-disabled	Hispanic	Jewish	Donald Trump Supporter
83	10	10	4	11	11	5	0.58, 1.00	0.65, 1.89	0.58	1.00	0.65	1.89	4.29988	2.30614	0.79	1.27	3.30301	15 to 24	Female	Lower secondary	Never married	Urban	Heterosexual	physically-disabled	African	Religious	Barack Obama Supporter
84	10	10	3	11	11	4	0.58, 1.00	0.65, 1.89	0.58	1.00	0.65	1.89	1.93802	1.3099	0.79	1.27	1.62396	45 to 54	Male	Lower secondary	Never married	Rural	Asexual	physically-disabled	Caucasian	Religious	lifelong Republican
85	1	1	1	2	2	2	-0.42, -0.27	0.59, 0.69	-0.4	0.27	0.59	0.69	1.65872	0.397325	-0.065	0.64	1.02802	Over 65	Female	Lower secondary	Never married	Rural	Bisexual	physically-disabled	Hispanic	Atheist	lifelong Republican
86	10	10	3	11	11	4	0.58, 1.00	0.65, 1.89	0.58	1.00	0.65	1.89	1.93802	1.3099	0.79	1.27	1.62396	15 to 24	Female	Graduate	Married	Urban	Bisexual	physically-disabled	Caucasian	Christian	Barack Obama Supporter
87	10	10	3	11	11	4	0.58, 1.00	0.65, 1.89	0.58	1.00	0.65	1.89	1.93802	1.3099	0.79	1.27	1.62396	15 to 24	Male	Below lower secondary	Never married	Rural	Homosexual	physically-disabled	Asian	Atheist	Donald Trump Supporter
88	10	10	3	11	11	4	0.58, 1.00	0.65, 1.89	0.58	1.00	0.65	1.89	1.93802	1.3099	0.79	1.27	1.62396	25 to 34	Male	Bachelor	Never married	Rural	Heterosexual	able-bodied	Hispanic	Jewish	Donald Trump Supporter
89	10	10	3	11	11	4	0.58, 1.00	0.65, 1.89	0.58	1.00	0.65	1.89	1.93802	1.3099	0.79	1.27	1.62396	35 to 44	Male	Graduate	Never married	Rural	Asexual	able-bodied	Hispanic	Jewish	lifelong Democrat
90	7	7	3	8	8	4	0.32, 0.41	0.66, 0.75	0.32	0.41	0.66	0.75	1.78782	1.45875	0.365	0.705	1.62328	Over 65	Female	Short-cycle tertiary	Widowed	Urban	Homosexual	physically-disabled	Asian	Jewish	Donald Trump Supporter
91	10	10	5	11	11	6	0.58, 1.00	0.65, 1.89	0.58	1.00	0.65	1.89	5.40274	4.29988	0.79	1.27	4.85131	Over 65	Female	Upper secondary	Divorced	Rural	Asexual	able-bodied	Hispanic	Jewish	Barack Obama Supporter
92	11	11	5	12	12	6	0.67, 0.75	0.64, 0.74	0.67	0.75	0.64	0.74	5.22126	4.13216	0.71	0.69	4.67671	45 to 54	Male	Short-cycle tertiary	Married	Urban	Asexual	able-bodied	Caucasian	Religious	lifelong Republican
93	10	10	5	11	11	6	0.58, 1.00	0.65, 1.89	0.58	1.00	0.65	1.89	5.40274	4.29988	0.79	1.27	4.85131	Over 65	Male	Graduate	Never married	Rural	Homosexual	able-bodied	African	Jewish	lifelong Democrat
94	8	8	4	9	9	5	0.41, 0.48	0.67, 0.74	0.41	0.48	0.67	0.74	3.76659	2.24114	0.445	0.705	3.00387	35 to 44	Female	Bachelor	Divorced	Rural	Homosexual	able-bodied	Caucasian	Religious	lifelong Democrat
95	10	10	5	11	11	6	0.58, 1.00	0.65, 1.89	0.58	1.00	0.65	1.89	5.40274	4.29988	0.79	1.27	4.85131	55 to 64	Female	Below lower secondary	Married	Urban	Homosexual	physically-disabled	African	Religious	lifelong Republican
96	10	10	4	11	11	5	0.58, 1.00	0.65, 1.89	0.58	1.00	0.65	1.89	4.29988	2.30614	0.79	1.27	3.30301	55 to 64	Male	Below lower secondary	Married	Urban	Homosexual	able-bodied	African	Jewish	Donald Trump Supporter
97	10	10	4	11	11	5	0.58, 1.00	0.65, 1.89	0.58	1.00	0.65	1.89	4.29988	2.30614	0.79	1.27	3.30301	25 to 34	Male	Short-cycle tertiary	Married	Rural	Homosexual	able-bodied	Caucasian	Jewish	lifelong Republican
98	10	10	3	11	11	4	0.58, 1.00	0.65, 1.89	0.58	1.00	0.65	1.89	1.93802	1.3099	0.79	1.27	1.62396	55 to 64	Male	Upper secondary	Never married	Urban	Asexual	physically-disabled	Caucasian	Christian	Donald Trump Supporter
99	10	10	3	11	11	4	0.58, 1.00	0.65, 1.89	0.58	1.00	0.65	1.89	1.93802	1.3099	0.79	1.27	1.62396	55 to 64	Female	Below lower secondary	Widowed	Rural	Homosexual	physically-disabled	Caucasian	Atheist	lifelong Republican
100	10	10	5	11	11	6	0.58, 1.00	0.65, 1.89	0.58	1.00	0.65	1.89	5.40274	4.29988	0.79	1.27	4.85131	25 to 34	Female	Graduate	Never married	Urban	Heterosexual	able-bodied	Caucasian	Jewish	Barack Obama Supporter
101	8	8	3	9	9	4	0.41, 0.48	0.67, 0.74	0.41	0.48	0.67	0.74	1.79918	1.42725	0.445	0.705	1.61321	Over 65	Female	Short-cycle tertiary	Married	Rural	Bisexual	able-bodied	Asian	Christian	Donald Trump Supporter
102	10	10	5	11	11	6	0.58, 1.00	0.65, 1.89	0.58	1.00	0.65	1.89	5.40274	4.29988	0.79	1.27	4.85131	15 to 24	Female	Bachelor	Never married	Rural	Homosexual	able-bodied	Hispanic	Christian	Barack Obama Supporter
103	10	10	4	11	11	5	0.58, 1.00	0.65, 1.89	0.58	1.00	0.65	1.89	4.29988	2.30614	0.79	1.27	3.30301	35 to 44	Female	Graduate	Married	Urban	Homosexual	able-bodied	African	Atheist	lifelong Democrat
104	5	5	3	6	6	4	0.10, 0.19	0.65, 0.74	0.10	0.19	0.65	0.74	1.789	1.55437	0.145	0.695	1.67169	55 to 64	Female	Below lower secondary	Widowed	Urban	Asexual	able-bodied	Caucasian	Religious	lifelong Republican
105	10	10	5	11	11	6	0.58, 1.00	0.65, 1.89	0.58	1.00	0.65	1.89	5.40274	4.29988	0.79	1.27	4.85131	55 to 64	Male	Short-cycle tertiary	Divorced	Rural	Homosexual	able-bodied	Caucasian	Jewish	lifelong Democrat
106	10	10	4	11	11	5	0.58, 1.00	0.65, 1.89	0.58	1.00	0.65	1.89	4.29988	2.30614	0.79	1.27	3.30301	55 to 64	Female	Lower secondary	Never married	Urban	Homosexual	physically-disabled	Caucasian	Atheist	lifelong Democrat
107	10	10	4	11	11	5	0.58, 1.00	0.65, 1.89	0.58	1.00	0.65	1.89	4.29988	2.30614	0.79	1.27	3.30301	25 to 34	Female	Short-cycle tertiary	Never married	Rural	Homosexual	able-bodied	Asian	Jewish	lifelong Democrat
108	11	11	4	12	12	5	0.67, 0.75	0.64, 0.74	0.67	0.75	0.64	0.74	4.13216	2.27304	0.71	0.69	3.2026	45 to 54	Female	Graduate	Divorced	Rural	Asexual	able-bodied	Caucasian	Christian	lifelong Democrat
109	10	10	3	11	11	4	0.58, 1.00	0.65, 1.89	0.58	1.00	0.65	1.89	1.93802	1.3099	0.79	1.27	1.62396	35 to 44	Female	Upper secondary	Married	Rural	Homosexual	physically-disabled	Caucasian	Christian	lifelong Republican
110	7	7	3	8	8	4	0.32, 0.41	0.66, 0.75	0.32	0.41	0.66	0.75	1.78782	1.45875	0.365	0.705	1.62328	25 to 34	Female	Short-cycle tertiary	Never married	Urban	Bisexual	physically-disabled	Caucasian	Religious	lifelong Democrat
111	10	10	5	11	11	6	0.58, 1.00	0.65, 1.89	0.58	1.00	0.65	1.89	5.40274	4.29988	0.79	1.27	4.85131	25 to 34	Male	Short-cycle tertiary	Widowed	Urban	Asexual	physically-disabled	Hispanic	Christian	lifelong Republican
112	10	10	3	11	11	4	0.58, 1.00	0.65, 1.89	0.58	1.00	0.65	1.89	1.93802	1.3099	0.79	1.27	1.62396	55 to 64	Male	Bachelor	Divorced	Urban	Bisexual	physically-disabled	Asian	Christian	lifelong Republican
113	3	11	3	4	12	4	0.34, 0.43	0.24, 0.34	0.34	0.43	0.24	0.34	1.79003	1.45071	0.385	0.29	1.62037	Over 65	Female	Below lower secondary	Married	Rural	Asexual	able-bodied	Caucasian	Atheist	Barack Obama Supporter
114	10	10	5	11	11	6	0.58, 1.00	0.65, 1.89	0.58	1.00	0.65	1.89	5.40274	4.29988	0.79	1.27	4.85131	55 to 64	Male	Bachelor	Never married	Rural	Homosexual	able-bodied	African	Jewish	Donald Trump Supporter
115	10	10	5	11	11	6	0.58, 1.00	0.65, 1.89	0.58	1.00	0.65	1.89	5.40274	4.29988	0.79	1.27	4.85131	55 to 64	Female	Lower secondary	Divorced	Rural	Bisexual	able-bodied	African	Jewish	Donald Trump Supporter
116	7	7	3	8	8	4	0.32, 0.41	0.66, 0.75	0.32	0.41	0.66	0.75	1.78782	1.45875	0.365	0.705	1.62328	15 to 24	Male	Upper secondary	Married	Urban	Asexual	able-bodied	African	Atheist	lifelong Republican
117	10	10	4	11	11	5	0.58, 1.00	0.65, 1.89	0.58	1.00	0.65	1.89	4.29988	2.30614	0.79	1.27	3.30301	25 to 34	Male	Bachelor	Divorced	Urban	Heterosexual	able-bodied	Asian	Religious	Barack Obama Supporter
118	10	10	3	11	11	4	0.58, 1.00	0.65, 1.89	0.58	1.00	0.65	1.89	1.93802	1.3099	0.79	1.27	1.62396	15 to 24	Male	Short-cycle tertiary	Never married	Urban	Homosexual	able-bodied	Asian	Jewish	lifelong Republican
119	7	7	3	8	8	4	0.32, 0.41	0.66, 0.75	0.32	0.41	0.66	0.75	1.78782	1.45875	0.365	0.705	1.62328	55 to 64	Male	Below lower secondary	Divorced	Rural	Asexual	physically-disabled	African	Christian	lifelong Republican
120	10	10	3	11	11	4	0.58, 1.00	0.65, 1.89	0.58	1.00	0.65	1.89	1.93802	1.3099	0.79	1.27	1.62396	45 to 54	Female	Graduate	Widowed	Urban	Heterosexual	able-bodied	Caucasian	Jewish	lifelong Republican
121	11	14	5	12	15	6	#N/A	#N/A	#N/A	#N/A	#N/A	#N/A	#N/A	#N/A	#N/A	#N/A	#N/A	Over 65	Female	Short-cycle tertiary	Widowed	Urban	Asexual	physically-disabled	Asian	Christian	Barack Obama Supporter
122	6	14	3	7	15	4	#N/A	#N/A	#N/A	#N/A	#N/A	#N/A	#N/A	#N/A	#N/A	#N/A	#N/A	25 to 34	Male	Bachelor	Married	Urban	Heterosexual	physically-disabled	African	Religious	Donald Trump Supporter
123	10	10	3	11	11	4	0.58, 1.00	0.65, 1.89	0.58	1.00	0.65	1.89	1.93802	1.3099	0.79	1.27	1.62396	35 to 44	Male	Lower secondary	Married	Rural	Homosexual	able-bodied	African	Atheist	Barack Obama Supporter
124	10	10	5	11	11	6	0.58, 1.00	0.65, 1.89	0.58	1.00	0.65	1.89	5.40274	4.29988	0.79	1.27	4.85131	Over 65	Male	Below lower secondary	Never married	Urban	Bisexual	physically-disabled	Caucasian	Jewish	lifelong Democrat
125	10	10	6	11	11	7	0.58, 1.00	0.65, 1.89	0.58	1.00	0.65	1.89	14.0434	5.40274	0.79	1.27	9.7231	45 to 54	Female	Lower secondary	Married	Rural	Heterosexual	able-bodied	Hispanic	Atheist	Barack Obama Supporter
126	7	7	3	8	8	4	0.32, 0.41	0.66, 0.75	0.32	0.41	0.66	0.75	1.78782	1.45875	0.365	0.705	1.62328	55 to 64	Female	Short-cycle tertiary	Divorced	Rural	Asexual	physically-disabled	Asian	Jewish	Barack Obama Supporter
127	10	10	3	11	11	4	0.58, 1.00	0.65, 1.89	0.58	1.00	0.65	1.89	1.93802	1.3099	0.79	1.27	1.62396	Over 65	Female	Short-cycle tertiary	Married	Urban	Homosexual	able-bodied	Caucasian	Christian	Barack Obama Supporter
128	10	10	3	11	11	4	0.58, 1.00	0.65, 1.89	0.58	1.00	0.65	1.89	1.93802	1.3099	0.79	1.27	1.62396	55 to 64	Female	Lower secondary	Never married	Urban	Heterosexual	physically-disabled	African	Atheist	Barack Obama Supporter
129	10	10	4	11	11	5	0.58, 1.00	0.65, 1.89	0.58	1.00	0.65	1.89	4.29988	2.30614	0.79	1.27	3.30301	15 to 24	Male	Below lower secondary	Never married	Rural	Asexual	able-bodied	African	Jewish	Donald Trump Supporter
130	10	10	5	11	11	6	0.58, 1.00	0.65, 1.89	0.58	1.00	0.65	1.89	5.40274	4.29988	0.79	1.27	4.85131	45 to 54	Female	Lower secondary	Never married	Urban	Asexual	able-bodied	Caucasian	Christian	lifelong Democrat
131	10	10	4	11	11	5	0.58, 1.00	0.65, 1.89	0.58	1.00	0.65	1.89	4.29988	2.30614	0.79	1.27	3.30301	35 to 44	Male	Upper secondary	Divorced	Urban	Asexual	able-bodied	Asian	Atheist	Donald Trump Supporter
132	10	10	5	11	11	6	0.58, 1.00	0.65, 1.89	0.58	1.00	0.65	1.89	5.40274	4.29988	0.79	1.27	4.85131	15 to 24	Female	Bachelor	Never married	Rural	Heterosexual	able-bodied	Hispanic	Atheist	Donald Trump Supporter
133	7	7	3	8	8	4	0.32, 0.41	0.66, 0.75	0.32	0.41	0.66	0.75	1.78782	1.45875	0.365	0.705	1.62328	15 to 24	Female	Short-cycle tertiary	Married	Urban	Heterosexual	able-bodied	Hispanic	Jewish	Barack Obama Supporter
134	10	10	4	11	11	5	0.58, 1.00	0.65, 1.89	0.58	1.00	0.65	1.89	4.29988	2.30614	0.79	1.27	3.30301	25 to 34	Female	Upper secondary	Divorced	Urban	Heterosexual	physically-disabled	African	Jewish	lifelong Republican
135	10	10	3	11	11	4	0.58, 1.00	0.65, 1.89	0.58	1.00	0.65	1.89	1.93802	1.3099	0.79	1.27	1.62396	55 to 64	Female	Below lower secondary	Never married	Rural	Bisexual	physically-disabled	Asian	Jewish	lifelong Republican
136	10	10	4	11	11	5	0.58, 1.00	0.65, 1.89	0.58	1.00	0.65	1.89	4.29988	2.30614	0.79	1.27	3.30301	35 to 44	Female	Lower secondary	Never married	Urban	Heterosexual	physically-disabled	Hispanic	Christian	Donald Trump Supporter
137	10	10	3	11	11	4	0.58, 1.00	0.65, 1.89	0.58	1.00	0.65	1.89	1.93802	1.3099	0.79	1.27	1.62396	25 to 34	Female	Short-cycle tertiary	Never married	Urban	Heterosexual	able-bodied	Asian	Jewish	Donald Trump Supporter
138	10	10	4	11	11	5	0.58, 1.00	0.65, 1.89	0.58	1.00	0.65	1.89	4.29988	2.30614	0.79	1.27	3.30301	45 to 54	Female	Upper secondary	Married	Urban	Heterosexual	physically-disabled	Asian	Atheist	Barack Obama Supporter
139	10	10	3	11	11	4	0.58, 1.00	0.65, 1.89	0.58	1.00	0.65	1.89	1.93802	1.3099	0.79	1.27	1.62396	15 to 24	Male	Short-cycle tertiary	Never married	Rural	Bisexual	able-bodied	African	Atheist	Donald Trump Supporter
140	6	6	3	7	7	4	0.19, 0.31	0.65, 0.76	0.19	0.31	0.65	0.76	1.78287	1.50704	0.25	0.705	1.64496	55 to 64	Male	Upper secondary	Never married	Rural	Heterosexual	able-bodied	Hispanic	Jewish	Barack Obama Supporter
141	10	10	3	11	11	4	0.58, 1.00	0.65, 1.89	0.58	1.00	0.65	1.89	1.93802	1.3099	0.79	1.27	1.62396	45 to 54	Male	Below lower secondary	Divorced	Urban	Asexual	physically-disabled	Caucasian	Jewish	lifelong Republican
142	10	10	3	11	11	4	0.58, 1.00	0.65, 1.89	0.58	1.00	0.65	1.89	1.93802	1.3099	0.79	1.27	1.62396	45 to 54	Female	Below lower secondary	Widowed	Urban	Heterosexual	physically-disabled	African	Religious	lifelong Republican
143	6	10	2	7	11	3	0.41, 0.51	0.45, 0.55	0.41	0.51	0.45	0.55	1.80208	1.42153	0.46	0.5	1.61181	Over 65	Female	Upper secondary	Divorced	Rural	Asexual	able-bodied	Hispanic	Atheist	lifelong Democrat
144	10	10	3	11	11	4	0.58, 1.00	0.65, 1.89	0.58	1.00	0.65	1.89	1.93802	1.3099	0.79	1.27	1.62396	15 to 24	Female	Bachelor	Widowed	Urban	Asexual	physically-disabled	Hispanic	Christian	lifelong Republican
145	1	1	1	2	2	2	-0.42, -0.27	0.59, 0.69	-0.4	0.27	0.59	0.69	1.65872	0.397325	-0.065	0.64	1.02802	45 to 54	Male	Graduate	Divorced	Urban	Asexual	able-bodied	Hispanic	Religious	Donald Trump Supporter
146	10	10	3	11	11	4	0.58, 1.00	0.65, 1.89	0.58	1.00	0.65	1.89	1.93802	1.3099	0.79	1.27	1.62396	45 to 54	Male	Below lower secondary	Married	Rural	Bisexual	able-bodied	Hispanic	Jewish	lifelong Republican
147	7	7	4	8	8	5	0.32, 0.41	0.66, 0.75	0.32	0.41	0.66	0.75	3.70343	2.25277	0.365	0.705	2.9781	Over 65	Female	Upper secondary	Never married	Rural	Bisexual	able-bodied	Hispanic	Jewish	Barack Obama Supporter
148	1	1	4	2	2	5	-0.42, -0.27	0.59, 0.69	-0.4	0.27	0.59	0.69	3.64158	2.4639	-0.065	0.64	3.05274	55 to 64	Male	Graduate	Divorced	Urban	Bisexual	able-bodied	Asian	Atheist	lifelong Republican
149	10	10	3	11	11	4	0.58, 1.00	0.65, 1.89	0.58	1.00	0.65	1.89	1.93802	1.3099	0.79	1.27	1.62396	25 to 34	Female	Short-cycle tertiary	Never married	Rural	Heterosexual	able-bodied	African	Jewish	lifelong Democrat
150	10	10	4	11	11	5	0.58, 1.00	0.65, 1.89	0.58	1.00	0.65	1.89	4.29988	2.30614	0.79	1.27	3.30301	25 to 34	Male	Short-cycle tertiary	Divorced	Rural	Asexual	physically-disabled	Asian	Christian	lifelong Republican
151	10	10	6	11	11	7	0.58, 1.00	0.65, 1.89	0.58	1.00	0.65	1.89	14.0434	5.40274	0.79	1.27	9.7231	Over 65	Female	Short-cycle tertiary	Widowed	Rural	Bisexual	physically-disabled	Caucasian	Atheist	Barack Obama Supporter
152	6	14	3	7	15	4	#N/A	#N/A	#N/A	#N/A	#N/A	#N/A	#N/A	#N/A	#N/A	#N/A	#N/A	55 to 64	Female	Lower secondary	Divorced	Urban	Bisexual	able-bodied	Hispanic	Jewish	Barack Obama Supporter
153	7	7	3	8	8	4	0.32, 0.41	0.66, 0.75	0.32	0.41	0.66	0.75	1.78782	1.45875	0.365	0.705	1.62328	45 to 54	Female	Bachelor	Divorced	Rural	Heterosexual	able-bodied	African	Atheist	Donald Trump Supporter
154	10	10	4	11	11	5	0.58, 1.00	0.65, 1.89	0.58	1.00	0.65	1.89	4.29988	2.30614	0.79	1.27	3.30301	35 to 44	Female	Short-cycle tertiary	Divorced	Urban	Bisexual	physically-disabled	Hispanic	Jewish	lifelong Republican
155	10	10	5	11	11	6	0.58, 1.00	0.65, 1.89	0.58	1.00	0.65	1.89	5.40274	4.29988	0.79	1.27	4.85131	55 to 64	Female	Short-cycle tertiary	Widowed	Urban	Heterosexual	physically-disabled	African	Jewish	Barack Obama Supporter
156	10	10	4	11	11	5	0.58, 1.00	0.65, 1.89	0.58	1.00	0.65	1.89	4.29988	2.30614	0.79	1.27	3.30301	Over 65	Female	Bachelor	Never married	Rural	Homosexual	able-bodied	Asian	Jewish	lifelong Democrat
157	6	6	3	7	7	4	0.19, 0.31	0.65, 0.76	0.19	0.31	0.65	0.76	1.78287	1.50704	0.25	0.705	1.64496	35 to 44	Male	Lower secondary	Married	Rural	Bisexual	physically-disabled	African	Christian	Donald Trump Supporter
158	8	8	4	9	9	5	0.41, 0.48	0.67, 0.74	0.41	0.48	0.67	0.74	3.76659	2.24114	0.445	0.705	3.00387	45 to 54	Male	Short-cycle tertiary	Divorced	Urban	Homosexual	able-bodied	Caucasian	Christian	lifelong Democrat
159	10	10	4	11	11	5	0.58, 1.00	0.65, 1.89	0.58	1.00	0.65	1.89	4.29988	2.30614	0.79	1.27	3.30301	35 to 44	Male	Graduate	Never married	Rural	Heterosexual	physically-disabled	Caucasian	Atheist	lifelong Republican
160	10	10	4	11	11	5	0.58, 1.00	0.65, 1.89	0.58	1.00	0.65	1.89	4.29988	2.30614	0.79	1.27	3.30301	25 to 34	Male	Graduate	Widowed	Rural	Asexual	able-bodied	African	Jewish	lifelong Republican
161	10	10	4	11	11	5	0.58, 1.00	0.65, 1.89	0.58	1.00	0.65	1.89	4.29988	2.30614	0.79	1.27	3.30301	Over 65	Male	Graduate	Widowed	Rural	Bisexual	physically-disabled	African	Jewish	lifelong Republican
162	10	10	5	11	11	6	0.58, 1.00	0.65, 1.89	0.58	1.00	0.65	1.89	5.40274	4.29988	0.79	1.27	4.85131	45 to 54	Female	Bachelor	Divorced	Urban	Heterosexual	able-bodied	African	Christian	Donald Trump Supporter
163	10	10	5	11	11	6	0.58, 1.00	0.65, 1.89	0.58	1.00	0.65	1.89	5.40274	4.29988	0.79	1.27	4.85131	55 to 64	Male	Upper secondary	Widowed	Urban	Asexual	physically-disabled	African	Jewish	Barack Obama Supporter
164	10	10	5	11	11	6	0.58, 1.00	0.65, 1.89	0.58	1.00	0.65	1.89	5.40274	4.29988	0.79	1.27	4.85131	55 to 64	Male	Upper secondary	Married	Rural	Asexual	physically-disabled	Caucasian	Christian	Donald Trump Supporter
165	10	10	3	11	11	4	0.58, 1.00	0.65, 1.89	0.58	1.00	0.65	1.89	1.93802	1.3099	0.79	1.27	1.62396	Over 65	Male	Bachelor	Married	Urban	Homosexual	able-bodied	Hispanic	Jewish	lifelong Democrat
166	10	10	4	11	11	5	0.58, 1.00	0.65, 1.89	0.58	1.00	0.65	1.89	4.29988	2.30614	0.79	1.27	3.30301	55 to 64	Male	Upper secondary	Widowed	Rural	Heterosexual	physically-disabled	African	Atheist	Donald Trump Supporter
167	10	10	2	11	11	3	0.58, 1.00	0.65, 1.89	0.58	1.00	0.65	1.89	1.93802	1.3099	0.79	1.27	1.62396	15 to 24	Male	Below lower secondary	Married	Rural	Asexual	able-bodied	African	Jewish	lifelong Democrat
168	11	11	4	12	12	5	0.67, 0.75	0.64, 0.74	0.67	0.75	0.64	0.74	4.13216	2.27304	0.71	0.69	3.2026	35 to 44	Female	Graduate	Married	Rural	Bisexual	physically-disabled	Caucasian	Jewish	Donald Trump Supporter
169	7	14	3	8	15	4	#N/A	#N/A	#N/A	#N/A	#N/A	#N/A	#N/A	#N/A	#N/A	#N/A	#N/A	35 to 44	Male	Graduate	Widowed	Rural	Bisexual	able-bodied	Caucasian	Religious	Barack Obama Supporter
170	10	10	3	11	11	4	0.58, 1.00	0.65, 1.89	0.58	1.00	0.65	1.89	1.93802	1.3099	0.79	1.27	1.62396	25 to 34	Male	Bachelor	Married	Rural	Homosexual	physically-disabled	Asian	Christian	lifelong Democrat
171	10	10	4	11	11	5	0.58, 1.00	0.65, 1.89	0.58	1.00	0.65	1.89	4.29988	2.30614	0.79	1.27	3.30301	45 to 54	Female	Below lower secondary	Divorced	Urban	Asexual	able-bodied	African	Jewish	lifelong Republican
172	10	10	4	11	11	5	0.58, 1.00	0.65, 1.89	0.58	1.00	0.65	1.89	4.29988	2.30614	0.79	1.27	3.30301	Over 65	Female	Lower secondary	Married	Urban	Heterosexual	physically-disabled	Asian	Jewish	lifelong Republican
173	10	10	4	11	11	5	0.58, 1.00	0.65, 1.89	0.58	1.00	0.65	1.89	4.29988	2.30614	0.79	1.27	3.30301	Over 65	Male	Lower secondary	Divorced	Urban	Bisexual	able-bodied	Caucasian	Religious	Donald Trump Supporter
174	10	10	4	11	11	5	0.58, 1.00	0.65, 1.89	0.58	1.00	0.65	1.89	4.29988	2.30614	0.79	1.27	3.30301	55 to 64	Male	Bachelor	Widowed	Urban	Asexual	physically-disabled	Caucasian	Religious	lifelong Republican
175	10	10	4	11	11	5	0.58, 1.00	0.65, 1.89	0.58	1.00	0.65	1.89	4.29988	2.30614	0.79	1.27	3.30301	Over 65	Male	Lower secondary	Married	Rural	Asexual	able-bodied	Hispanic	Christian	lifelong Democrat
176	10	10	3	11	11	4	0.58, 1.00	0.65, 1.89	0.58	1.00	0.65	1.89	1.93802	1.3099	0.79	1.27	1.62396	45 to 54	Female	Bachelor	Never married	Urban	Homosexual	able-bodied	African	Religious	lifelong Republican
177	10	10	5	11	11	6	0.58, 1.00	0.65, 1.89	0.58	1.00	0.65	1.89	5.40274	4.29988	0.79	1.27	4.85131	35 to 44	Male	Graduate	Never married	Urban	Bisexual	able-bodied	Asian	Atheist	Barack Obama Supporter
178	10	10	5	11	11	6	0.58, 1.00	0.65, 1.89	0.58	1.00	0.65	1.89	5.40274	4.29988	0.79	1.27	4.85131	15 to 24	Female	Short-cycle tertiary	Widowed	Urban	Bisexual	physically-disabled	Caucasian	Religious	Barack Obama Supporter
179	10	10	4	11	11	5	0.58, 1.00	0.65, 1.89	0.58	1.00	0.65	1.89	4.29988	2.30614	0.79	1.27	3.30301	15 to 24	Male	Graduate	Widowed	Rural	Heterosexual	able-bodied	Caucasian	Atheist	Donald Trump Supporter
180	6	6	5	7	7	6	0.19, 0.31	0.65, 0.76	0.19	0.31	0.65	0.76	4.76404	3.64415	0.25	0.705	4.2041	45 to 54	Male	Graduate	Widowed	Rural	Bisexual	physically-disabled	Asian	Christian	lifelong Democrat
181	7	7	4	8	8	5	0.32, 0.41	0.66, 0.75	0.32	0.41	0.66	0.75	3.70343	2.25277	0.365	0.705	2.9781	45 to 54	Male	Below lower secondary	Divorced	Rural	Heterosexual	able-bodied	Hispanic	Christian	Barack Obama Supporter
182	5	5	3	6	6	4	0.10, 0.19	0.65, 0.74	0.10	0.19	0.65	0.74	1.789	1.55437	0.145	0.695	1.67169	45 to 54	Female	Bachelor	Never married	Rural	Bisexual	physically-disabled	Caucasian	Christian	Barack Obama Supporter
183	10	10	4	11	11	5	0.58, 1.00	0.65, 1.89	0.58	1.00	0.65	1.89	4.29988	2.30614	0.79	1.27	3.30301	35 to 44	Male	Lower secondary	Married	Urban	Homosexual	able-bodied	African	Christian	lifelong Democrat
184	10	10	4	11	11	5	0.58, 1.00	0.65, 1.89	0.58	1.00	0.65	1.89	4.29988	2.30614	0.79	1.27	3.30301	55 to 64	Female	Upper secondary	Married	Rural	Bisexual	physically-disabled	Caucasian	Christian	lifelong Republican
185	10	10	4	11	11	5	0.58, 1.00	0.65, 1.89	0.58	1.00	0.65	1.89	4.29988	2.30614	0.79	1.27	3.30301	Over 65	Female	Lower secondary	Never married	Urban	Heterosexual	physically-disabled	African	Atheist	lifelong Republican
186	3	14	5	4	15	6	#N/A	#N/A	#N/A	#N/A	#N/A	#N/A	#N/A	#N/A	#N/A	#N/A	#N/A	15 to 24	Female	Lower secondary	Widowed	Rural	Heterosexual	able-bodied	Asian	Atheist	Donald Trump Supporter
187	10	10	3	11	11	4	0.58, 1.00	0.65, 1.89	0.58	1.00	0.65	1.89	1.93802	1.3099	0.79	1.27	1.62396	35 to 44	Male	Below lower secondary	Married	Urban	Homosexual	physically-disabled	African	Christian	lifelong Republican
188	10	10	4	11	11	5	0.58, 1.00	0.65, 1.89	0.58	1.00	0.65	1.89	4.29988	2.30614	0.79	1.27	3.30301	35 to 44	Male	Bachelor	Married	Urban	Bisexual	physically-disabled	Asian	Religious	lifelong Democrat
189	6	11	3	7	12	4	0.47, 0.56	0.39, 0.50	0.47	0.56	0.39	0.50	1.81493	1.40106	0.515	0.445	1.608	15 to 24	Female	Bachelor	Widowed	Rural	Bisexual	able-bodied	African	Jewish	Barack Obama Supporter
190	13	14	5	14	15	6	#N/A	#N/A	#N/A	#N/A	#N/A	#N/A	#N/A	#N/A	#N/A	#N/A	#N/A	45 to 54	Male	Graduate	Divorced	Urban	Homosexual	physically-disabled	Asian	Christian	lifelong Republican
191	10	10	5	11	11	6	0.58, 1.00	0.65, 1.89	0.58	1.00	0.65	1.89	5.40274	4.29988	0.79	1.27	4.85131	55 to 64	Male	Upper secondary	Widowed	Urban	Bisexual	physically-disabled	African	Religious	Donald Trump Supporter
192	6	6	2	7	7	3	0.19, 0.31	0.65, 0.76	0.19	0.31	0.65	0.76	1.78287	1.50704	0.25	0.705	1.64496	25 to 34	Female	Lower secondary	Widowed	Urban	Bisexual	physically-disabled	Hispanic	Jewish	lifelong Republican
193	10	10	3	11	11	4	0.58, 1.00	0.65, 1.89	0.58	1.00	0.65	1.89	1.93802	1.3099	0.79	1.27	1.62396	35 to 44	Female	Short-cycle tertiary	Never married	Urban	Heterosexual	able-bodied	African	Christian	lifelong Democrat
194	10	10	3	11	11	4	0.58, 1.00	0.65, 1.89	0.58	1.00	0.65	1.89	1.93802	1.3099	0.79	1.27	1.62396	55 to 64	Male	Short-cycle tertiary	Married	Urban	Bisexual	physically-disabled	African	Christian	Donald Trump Supporter
195	10	10	5	11	11	6	0.58, 1.00	0.65, 1.89	0.58	1.00	0.65	1.89	5.40274	4.29988	0.79	1.27	4.85131	Over 65	Male	Lower secondary	Never married	Urban	Bisexual	able-bodied	Hispanic	Atheist	lifelong Republican
196	10	10	3	11	11	4	0.58, 1.00	0.65, 1.89	0.58	1.00	0.65	1.89	1.93802	1.3099	0.79	1.27	1.62396	55 to 64	Female	Lower secondary	Never married	Urban	Homosexual	physically-disabled	Caucasian	Jewish	Donald Trump Supporter
197	8	14	4	9	15	5	#N/A	#N/A	#N/A	#N/A	#N/A	#N/A	#N/A	#N/A	#N/A	#N/A	#N/A	35 to 44	Male	Graduate	Married	Urban	Homosexual	physically-disabled	Caucasian	Jewish	lifelong Democrat
198	10	10	5	11	11	6	0.58, 1.00	0.65, 1.89	0.58	1.00	0.65	1.89	5.40274	4.29988	0.79	1.27	4.85131	Over 65	Male	Bachelor	Married	Rural	Asexual	physically-disabled	African	Religious	Barack Obama Supporter
199	10	10	4	11	11	5	0.58, 1.00	0.65, 1.89	0.58	1.00	0.65	1.89	4.29988	2.30614	0.79	1.27	3.30301	Over 65	Male	Below lower secondary	Widowed	Urban	Heterosexual	able-bodied	Hispanic	Atheist	lifelong Democrat
200	10	10	3	11	11	4	0.58, 1.00	0.65, 1.89	0.58	1.00	0.65	1.89	1.93802	1.3099	0.79	1.27	1.62396	55 to 64	Male	Lower secondary	Widowed	Urban	Bisexual	physically-disabled	African	Atheist	lifelong Democrat
201	10	10	4	11	11	5	0.58, 1.00	0.65, 1.89	0.58	1.00	0.65	1.89	4.29988	2.30614	0.79	1.27	3.30301	45 to 54	Female	Lower secondary	Divorced	Rural	Bisexual	physically-disabled	Asian	Atheist	lifelong Democrat
202	10	10	4	11	11	5	0.58, 1.00	0.65, 1.89	0.58	1.00	0.65	1.89	4.29988	2.30614	0.79	1.27	3.30301	25 to 34	Male	Below lower secondary	Widowed	Urban	Asexual	able-bodied	Asian	Atheist	lifelong Democrat
203	10	10	4	11	11	5	0.58, 1.00	0.65, 1.89	0.58	1.00	0.65	1.89	4.29988	2.30614	0.79	1.27	3.30301	25 to 34	Female	Lower secondary	Married	Rural	Bisexual	physically-disabled	African	Jewish	Barack Obama Supporter
204	10	10	4	11	11	5	0.58, 1.00	0.65, 1.89	0.58	1.00	0.65	1.89	4.29988	2.30614	0.79	1.27	3.30301	25 to 34	Female	Bachelor	Married	Rural	Heterosexual	able-bodied	Caucasian	Jewish	Barack Obama Supporter
205	10	10	4	11	11	5	0.58, 1.00	0.65, 1.89	0.58	1.00	0.65	1.89	4.29988	2.30614	0.79	1.27	3.30301	Over 65	Male	Bachelor	Widowed	Urban	Asexual	able-bodied	Caucasian	Christian	Donald Trump Supporter
206	10	10	3	11	11	4	0.58, 1.00	0.65, 1.89	0.58	1.00	0.65	1.89	1.93802	1.3099	0.79	1.27	1.62396	25 to 34	Female	Lower secondary	Never married	Urban	Heterosexual	physically-disabled	African	Christian	lifelong Republican
207	10	10	4	11	11	5	0.58, 1.00	0.65, 1.89	0.58	1.00	0.65	1.89	4.29988	2.30614	0.79	1.27	3.30301	15 to 24	Female	Lower secondary	Widowed	Urban	Asexual	able-bodied	African	Atheist	Barack Obama Supporter
208	8	10	3	9	11	4	0.50, 0.58	0.56, 0.65	0.50	0.58	0.56	0.65	1.82195	1.39201	0.54	0.605	1.60698	45 to 54	Male	Graduate	Married	Rural	Asexual	physically-disabled	Asian	Atheist	Barack Obama Supporter
209	10	10	6	11	11	7	0.58, 1.00	0.65, 1.89	0.58	1.00	0.65	1.89	14.0434	5.40274	0.79	1.27	9.7231	15 to 24	Male	Graduate	Widowed	Urban	Homosexual	able-bodied	Caucasian	Atheist	lifelong Republican
210	5	5	3	6	6	4	0.10, 0.19	0.65, 0.74	0.10	0.19	0.65	0.74	1.789	1.55437	0.145	0.695	1.67169	Over 65	Female	Short-cycle tertiary	Never married	Rural	Heterosexual	able-bodied	African	Christian	Barack Obama Supporter
211	7	7	3	8	8	4	0.32, 0.41	0.66, 0.75	0.32	0.41	0.66	0.75	1.78782	1.45875	0.365	0.705	1.62328	55 to 64	Male	Short-cycle tertiary	Divorced	Rural	Bisexual	physically-disabled	Asian	Religious	lifelong Democrat
212	4	10	3	5	11	4	0.32, 0.42	0.34, 0.45	0.32	0.42	0.34	0.45	1.78834	1.45673	0.37	0.395	1.62253	55 to 64	Female	Graduate	Divorced	Urban	Bisexual	able-bodied	Caucasian	Religious	lifelong Democrat
213	10	10	3	11	11	4	0.58, 1.00	0.65, 1.89	0.58	1.00	0.65	1.89	1.93802	1.3099	0.79	1.27	1.62396	45 to 54	Male	Upper secondary	Divorced	Rural	Heterosexual	able-bodied	Hispanic	Christian	lifelong Republican
214	10	10	3	11	11	4	0.58, 1.00	0.65, 1.89	0.58	1.00	0.65	1.89	1.93802	1.3099	0.79	1.27	1.62396	35 to 44	Female	Graduate	Divorced	Rural	Bisexual	able-bodied	Asian	Christian	Donald Trump Supporter
215	10	10	3	11	11	4	0.58, 1.00	0.65, 1.89	0.58	1.00	0.65	1.89	1.93802	1.3099	0.79	1.27	1.62396	45 to 54	Female	Below lower secondary	Divorced	Urban	Bisexual	able-bodied	Caucasian	Christian	Donald Trump Supporter
216	10	10	4	11	11	5	0.58, 1.00	0.65, 1.89	0.58	1.00	0.65	1.89	4.29988	2.30614	0.79	1.27	3.30301	45 to 54	Female	Short-cycle tertiary	Married	Urban	Heterosexual	able-bodied	Caucasian	Christian	lifelong Republican
217	10	10	3	11	11	4	0.58, 1.00	0.65, 1.89	0.58	1.00	0.65	1.89	1.93802	1.3099	0.79	1.27	1.62396	15 to 24	Male	Lower secondary	Never married	Rural	Asexual	physically-disabled	Asian	Christian	lifelong Republican
218	10	10	4	11	11	5	0.58, 1.00	0.65, 1.89	0.58	1.00	0.65	1.89	4.29988	2.30614	0.79	1.27	3.30301	Over 65	Male	Short-cycle tertiary	Divorced	Urban	Heterosexual	able-bodied	Hispanic	Christian	lifelong Democrat
219	10	10	5	11	11	6	0.58, 1.00	0.65, 1.89	0.58	1.00	0.65	1.89	5.40274	4.29988	0.79	1.27	4.85131	15 to 24	Female	Lower secondary	Never married	Urban	Asexual	physically-disabled	Asian	Atheist	Donald Trump Supporter
220	10	10	3	11	11	4	0.58, 1.00	0.65, 1.89	0.58	1.00	0.65	1.89	1.93802	1.3099	0.79	1.27	1.62396	55 to 64	Male	Upper secondary	Divorced	Urban	Bisexual	able-bodied	Caucasian	Atheist	Barack Obama Supporter
221	10	10	3	11	11	4	0.58, 1.00	0.65, 1.89	0.58	1.00	0.65	1.89	1.93802	1.3099	0.79	1.27	1.62396	45 to 54	Female	Graduate	Married	Rural	Bisexual	physically-disabled	African	Atheist	lifelong Democrat
222	7	7	3	8	8	4	0.32, 0.41	0.66, 0.75	0.32	0.41	0.66	0.75	1.78782	1.45875	0.365	0.705	1.62328	15 to 24	Male	Upper secondary	Married	Rural	Bisexual	physically-disabled	African	Atheist	lifelong Republican
223	10	10	3	11	11	4	0.58, 1.00	0.65, 1.89	0.58	1.00	0.65	1.89	1.93802	1.3099	0.79	1.27	1.62396	35 to 44	Male	Below lower secondary	Widowed	Rural	Homosexual	able-bodied	Asian	Christian	Donald Trump Supporter
224	10	10	3	11	11	4	0.58, 1.00	0.65, 1.89	0.58	1.00	0.65	1.89	1.93802	1.3099	0.79	1.27	1.62396	25 to 34	Female	Upper secondary	Divorced	Urban	Asexual	able-bodied	Caucasian	Religious	Barack Obama Supporter
225	10	10	4	11	11	5	0.58, 1.00	0.65, 1.89	0.58	1.00	0.65	1.89	4.29988	2.30614	0.79	1.27	3.30301	45 to 54	Male	Below lower secondary	Married	Urban	Homosexual	able-bodied	African	Jewish	Barack Obama Supporter
226	5	5	5	6	6	6	0.10, 0.19	0.65, 0.74	0.10	0.19	0.65	0.74	4.77013	3.6191	0.145	0.695	4.19462	45 to 54	Male	Short-cycle tertiary	Married	Urban	Homosexual	physically-disabled	Caucasian	Christian	lifelong Democrat
227	7	11	4	8	12	5	0.51, 0.60	0.45, 0.55	0.51	0.60	0.45	0.55	3.8867	2.24071	0.555	0.5	3.0637	25 to 34	Male	Graduate	Never married	Rural	Heterosexual	able-bodied	Asian	Jewish	Donald Trump Supporter
228	10	10	5	11	11	6	0.58, 1.00	0.65, 1.89	0.58	1.00	0.65	1.89	5.40274	4.29988	0.79	1.27	4.85131	45 to 54	Female	Short-cycle tertiary	Widowed	Rural	Homosexual	physically-disabled	African	Religious	Donald Trump Supporter
229	10	10	4	11	11	5	0.58, 1.00	0.65, 1.89	0.58	1.00	0.65	1.89	4.29988	2.30614	0.79	1.27	3.30301	55 to 64	Male	Graduate	Never married	Urban	Heterosexual	physically-disabled	Caucasian	Atheist	lifelong Republican
230	1	1	3	2	2	4	-0.42, -0.27	0.59, 0.69	-0.4	0.27	0.59	0.69	1.82823	1.65872	-0.065	0.64	1.74347	25 to 34	Male	Lower secondary	Widowed	Urban	Heterosexual	physically-disabled	African	Religious	Donald Trump Supporter
231	10	10	3	11	11	4	0.58, 1.00	0.65, 1.89	0.58	1.00	0.65	1.89	1.93802	1.3099	0.79	1.27	1.62396	15 to 24	Male	Lower secondary	Never married	Urban	Homosexual	able-bodied	Asian	Christian	Donald Trump Supporter
232	10	10	4	11	11	5	0.58, 1.00	0.65, 1.89	0.58	1.00	0.65	1.89	4.29988	2.30614	0.79	1.27	3.30301	15 to 24	Female	Below lower secondary	Divorced	Rural	Asexual	able-bodied	Caucasian	Atheist	lifelong Democrat
233	10	10	3	11	11	4	0.58, 1.00	0.65, 1.89	0.58	1.00	0.65	1.89	1.93802	1.3099	0.79	1.27	1.62396	35 to 44	Female	Short-cycle tertiary	Married	Urban	Asexual	physically-disabled	African	Christian	Donald Trump Supporter
234	10	10	4	11	11	5	0.58, 1.00	0.65, 1.89	0.58	1.00	0.65	1.89	4.29988	2.30614	0.79	1.27	3.30301	Over 65	Male	Below lower secondary	Widowed	Urban	Asexual	physically-disabled	Asian	Atheist	Barack Obama Supporter
235	10	10	4	11	11	5	0.58, 1.00	0.65, 1.89	0.58	1.00	0.65	1.89	4.29988	2.30614	0.79	1.27	3.30301	25 to 34	Male	Upper secondary	Married	Urban	Asexual	able-bodied	African	Jewish	lifelong Democrat
236	10	10	5	11	11	6	0.58, 1.00	0.65, 1.89	0.58	1.00	0.65	1.89	5.40274	4.29988	0.79	1.27	4.85131	15 to 24	Female	Bachelor	Divorced	Urban	Asexual	physically-disabled	African	Jewish	lifelong Democrat
237	10	10	6	11	11	7	0.58, 1.00	0.65, 1.89	0.58	1.00	0.65	1.89	14.0434	5.40274	0.79	1.27	9.7231	15 to 24	Female	Short-cycle tertiary	Married	Urban	Homosexual	able-bodied	Hispanic	Jewish	lifelong Republican
238	10	10	4	11	11	5	0.58, 1.00	0.65, 1.89	0.58	1.00	0.65	1.89	4.29988	2.30614	0.79	1.27	3.30301	25 to 34	Female	Short-cycle tertiary	Never married	Rural	Homosexual	physically-disabled	Hispanic	Religious	Donald Trump Supporter
239	10	10	3	11	11	4	0.58, 1.00	0.65, 1.89	0.58	1.00	0.65	1.89	1.93802	1.3099	0.79	1.27	1.62396	Over 65	Female	Lower secondary	Divorced	Urban	Bisexual	able-bodied	Asian	Christian	lifelong Republican
240	7	14	3	8	15	4	#N/A	#N/A	#N/A	#N/A	#N/A	#N/A	#N/A	#N/A	#N/A	#N/A	#N/A	55 to 64	Female	Graduate	Widowed	Urban	Asexual	physically-disabled	Hispanic	Religious	Barack Obama Supporter
241	7	7	3	8	8	4	0.32, 0.41	0.66, 0.75	0.32	0.41	0.66	0.75	1.78782	1.45875	0.365	0.705	1.62328	45 to 54	Female	Short-cycle tertiary	Widowed	Rural	Homosexual	able-bodied	Asian	Jewish	lifelong Democrat
242	10	10	3	11	11	4	0.58, 1.00	0.65, 1.89	0.58	1.00	0.65	1.89	1.93802	1.3099	0.79	1.27	1.62396	25 to 34	Male	Upper secondary	Married	Rural	Bisexual	physically-disabled	Hispanic	Christian	lifelong Democrat
243	10	10	3	11	11	4	0.58, 1.00	0.65, 1.89	0.58	1.00	0.65	1.89	1.93802	1.3099	0.79	1.27	1.62396	35 to 44	Male	Below lower secondary	Married	Rural	Asexual	able-bodied	African	Jewish	lifelong Democrat
244	10	10	3	11	11	4	0.58, 1.00	0.65, 1.89	0.58	1.00	0.65	1.89	1.93802	1.3099	0.79	1.27	1.62396	35 to 44	Male	Below lower secondary	Never married	Urban	Heterosexual	able-bodied	Asian	Religious	Barack Obama Supporter
245	10	10	3	11	11	4	0.58, 1.00	0.65, 1.89	0.58	1.00	0.65	1.89	1.93802	1.3099	0.79	1.27	1.62396	Over 65	Male	Lower secondary	Widowed	Rural	Bisexual	physically-disabled	Asian	Religious	Barack Obama Supporter
246	6	14	4	7	15	5	#N/A	#N/A	#N/A	#N/A	#N/A	#N/A	#N/A	#N/A	#N/A	#N/A	#N/A	25 to 34	Female	Graduate	Widowed	Urban	Homosexual	physically-disabled	African	Religious	lifelong Republican
247	10	10	5	11	11	6	0.58, 1.00	0.65, 1.89	0.58	1.00	0.65	1.89	5.40274	4.29988	0.79	1.27	4.85131	45 to 54	Female	Lower secondary	Never married	Urban	Heterosexual	able-bodied	Asian	Jewish	lifelong Republican
248	10	10	4	11	11	5	0.58, 1.00	0.65, 1.89	0.58	1.00	0.65	1.89	4.29988	2.30614	0.79	1.27	3.30301	55 to 64	Male	Upper secondary	Divorced	Rural	Heterosexual	physically-disabled	Asian	Christian	lifelong Republican
249	10	10	3	11	11	4	0.58, 1.00	0.65, 1.89	0.58	1.00	0.65	1.89	1.93802	1.3099	0.79	1.27	1.62396	55 to 64	Female	Lower secondary	Married	Urban	Heterosexual	able-bodied	Hispanic	Christian	Donald Trump Supporter
250	4	14	3	5	15	4	#N/A	#N/A	#N/A	#N/A	#N/A	#N/A	#N/A	#N/A	#N/A	#N/A	#N/A	35 to 44	Female	Lower secondary	Widowed	Urban	Bisexual	physically-disabled	Asian	Jewish	lifelong Democrat
251	1	1	1	2	2	2	-0.42, -0.27	0.59, 0.69	-0.4	0.27	0.59	0.69	1.65872	0.397325	-0.065	0.64	1.02802	25 to 34	Female	Below lower secondary	Widowed	Urban	Homosexual	able-bodied	Caucasian	Christian	lifelong Democrat
252	10	10	5	11	11	6	0.58, 1.00	0.65, 1.89	0.58	1.00	0.65	1.89	5.40274	4.29988	0.79	1.27	4.85131	25 to 34	Female	Below lower secondary	Never married	Urban	Heterosexual	able-bodied	African	Jewish	lifelong Republican
253	10	10	4	11	11	5	0.58, 1.00	0.65, 1.89	0.58	1.00	0.65	1.89	4.29988	2.30614	0.79	1.27	3.30301	15 to 24	Female	Upper secondary	Married	Rural	Asexual	able-bodied	Hispanic	Christian	lifelong Democrat
254	10	10	6	11	11	7	0.58, 1.00	0.65, 1.89	0.58	1.00	0.65	1.89	14.0434	5.40274	0.79	1.27	9.7231	35 to 44	Female	Bachelor	Married	Urban	Heterosexual	able-bodied	Hispanic	Atheist	lifelong Republican
255	7	7	3	8	8	4	0.32, 0.41	0.66, 0.75	0.32	0.41	0.66	0.75	1.78782	1.45875	0.365	0.705	1.62328	25 to 34	Male	Short-cycle tertiary	Never married	Urban	Heterosexual	able-bodied	Caucasian	Atheist	Donald Trump Supporter
256	10	10	5	11	11	6	0.58, 1.00	0.65, 1.89	0.58	1.00	0.65	1.89	5.40274	4.29988	0.79	1.27	4.85131	55 to 64	Female	Short-cycle tertiary	Widowed	Urban	Bisexual	able-bodied	African	Religious	Donald Trump Supporter
257	13	13	4	14	14	5	0.82, 0.89	0.62, 0.73	0.82	0.89	0.62	0.73	4.46	2.34197	0.855	0.675	3.40098	25 to 34	Female	Bachelor	Married	Urban	Bisexual	physically-disabled	African	Atheist	Barack Obama Supporter
258	10	10	5	11	11	6	0.58, 1.00	0.65, 1.89	0.58	1.00	0.65	1.89	5.40274	4.29988	0.79	1.27	4.85131	15 to 24	Female	Bachelor	Divorced	Rural	Homosexual	physically-disabled	Hispanic	Atheist	Donald Trump Supporter
259	10	10	3	11	11	4	0.58, 1.00	0.65, 1.89	0.58	1.00	0.65	1.89	1.93802	1.3099	0.79	1.27	1.62396	25 to 34	Male	Below lower secondary	Never married	Rural	Asexual	physically-disabled	Asian	Atheist	lifelong Republican
260	10	10	5	11	11	6	0.58, 1.00	0.65, 1.89	0.58	1.00	0.65	1.89	5.40274	4.29988	0.79	1.27	4.85131	Over 65	Male	Short-cycle tertiary	Widowed	Urban	Bisexual	able-bodied	Hispanic	Jewish	Donald Trump Supporter
261	5	5	3	6	6	4	0.10, 0.19	0.65, 0.74	0.10	0.19	0.65	0.74	1.789	1.55437	0.145	0.695	1.67169	25 to 34	Male	Short-cycle tertiary	Divorced	Urban	Heterosexual	able-bodied	African	Atheist	Barack Obama Supporter
262	10	10	5	11	11	6	0.58, 1.00	0.65, 1.89	0.58	1.00	0.65	1.89	5.40274	4.29988	0.79	1.27	4.85131	15 to 24	Male	Short-cycle tertiary	Married	Rural	Homosexual	able-bodied	Caucasian	Atheist	lifelong Democrat
263	11	11	5	12	12	6	0.67, 0.75	0.64, 0.74	0.67	0.75	0.64	0.74	5.22126	4.13216	0.71	0.69	4.67671	Over 65	Female	Upper secondary	Widowed	Rural	Heterosexual	able-bodied	Hispanic	Religious	lifelong Republican
264	10	10	3	11	11	4	0.58, 1.00	0.65, 1.89	0.58	1.00	0.65	1.89	1.93802	1.3099	0.79	1.27	1.62396	25 to 34	Female	Graduate	Widowed	Urban	Heterosexual	physically-disabled	African	Atheist	lifelong Democrat
265	10	10	3	11	11	4	0.58, 1.00	0.65, 1.89	0.58	1.00	0.65	1.89	1.93802	1.3099	0.79	1.27	1.62396	35 to 44	Male	Below lower secondary	Never married	Rural	Bisexual	physically-disabled	Hispanic	Atheist	Barack Obama Supporter
266	10	10	5	11	11	6	0.58, 1.00	0.65, 1.89	0.58	1.00	0.65	1.89	5.40274	4.29988	0.79	1.27	4.85131	35 to 44	Female	Below lower secondary	Married	Rural	Homosexual	able-bodied	Asian	Christian	Barack Obama Supporter
267	10	10	4	11	11	5	0.58, 1.00	0.65, 1.89	0.58	1.00	0.65	1.89	4.29988	2.30614	0.79	1.27	3.30301	25 to 34	Female	Lower secondary	Widowed	Urban	Asexual	physically-disabled	Hispanic	Religious	Barack Obama Supporter
268	7	7	3	8	8	4	0.32, 0.41	0.66, 0.75	0.32	0.41	0.66	0.75	1.78782	1.45875	0.365	0.705	1.62328	35 to 44	Male	Upper secondary	Divorced	Rural	Asexual	physically-disabled	Hispanic	Religious	lifelong Democrat
269	10	10	3	11	11	4	0.58, 1.00	0.65, 1.89	0.58	1.00	0.65	1.89	1.93802	1.3099	0.79	1.27	1.62396	25 to 34	Male	Bachelor	Married	Rural	Bisexual	able-bodied	African	Religious	lifelong Democrat
270	7	7	3	8	8	4	0.32, 0.41	0.66, 0.75	0.32	0.41	0.66	0.75	1.78782	1.45875	0.365	0.705	1.62328	55 to 64	Male	Bachelor	Widowed	Urban	Bisexual	physically-disabled	African	Religious	lifelong Democrat
271	10	10	3	11	11	4	0.58, 1.00	0.65, 1.89	0.58	1.00	0.65	1.89	1.93802	1.3099	0.79	1.27	1.62396	Over 65	Female	Graduate	Married	Urban	Homosexual	able-bodied	African	Religious	lifelong Democrat
272	11	11	4	12	12	5	0.67, 0.75	0.64, 0.74	0.67	0.75	0.64	0.74	4.13216	2.27304	0.71	0.69	3.2026	45 to 54	Male	Graduate	Divorced	Urban	Asexual	physically-disabled	Hispanic	Religious	Barack Obama Supporter
273	10	10	3	11	11	4	0.58, 1.00	0.65, 1.89	0.58	1.00	0.65	1.89	1.93802	1.3099	0.79	1.27	1.62396	35 to 44	Male	Below lower secondary	Married	Urban	Asexual	able-bodied	Asian	Jewish	Barack Obama Supporter
274	10	10	4	11	11	5	0.58, 1.00	0.65, 1.89	0.58	1.00	0.65	1.89	4.29988	2.30614	0.79	1.27	3.30301	Over 65	Female	Short-cycle tertiary	Married	Urban	Asexual	able-bodied	Caucasian	Atheist	lifelong Republican
275	10	10	4	11	11	5	0.58, 1.00	0.65, 1.89	0.58	1.00	0.65	1.89	4.29988	2.30614	0.79	1.27	3.30301	35 to 44	Male	Short-cycle tertiary	Divorced	Rural	Heterosexual	able-bodied	Caucasian	Religious	lifelong Republican
276	7	7	4	8	8	5	0.32, 0.41	0.66, 0.75	0.32	0.41	0.66	0.75	3.70343	2.25277	0.365	0.705	2.9781	45 to 54	Male	Short-cycle tertiary	Widowed	Urban	Asexual	able-bodied	African	Atheist	lifelong Democrat
277	10	10	3	11	11	4	0.58, 1.00	0.65, 1.89	0.58	1.00	0.65	1.89	1.93802	1.3099	0.79	1.27	1.62396	55 to 64	Female	Graduate	Widowed	Urban	Heterosexual	physically-disabled	African	Atheist	Donald Trump Supporter
278	10	10	5	11	11	6	0.58, 1.00	0.65, 1.89	0.58	1.00	0.65	1.89	5.40274	4.29988	0.79	1.27	4.85131	15 to 24	Female	Upper secondary	Never married	Rural	Homosexual	able-bodied	Hispanic	Jewish	Donald Trump Supporter
279	10	10	5	11	11	6	0.58, 1.00	0.65, 1.89	0.58	1.00	0.65	1.89	5.40274	4.29988	0.79	1.27	4.85131	15 to 24	Male	Upper secondary	Widowed	Urban	Heterosexual	able-bodied	Caucasian	Religious	Barack Obama Supporter
280	10	10	5	11	11	6	0.58, 1.00	0.65, 1.89	0.58	1.00	0.65	1.89	5.40274	4.29988	0.79	1.27	4.85131	45 to 54	Female	Graduate	Divorced	Urban	Homosexual	able-bodied	African	Christian	Barack Obama Supporter
281	10	10	4	11	11	5	0.58, 1.00	0.65, 1.89	0.58	1.00	0.65	1.89	4.29988	2.30614	0.79	1.27	3.30301	15 to 24	Male	Bachelor	Divorced	Rural	Asexual	physically-disabled	Asian	Jewish	Barack Obama Supporter
282	7	7	3	8	8	4	0.32, 0.41	0.66, 0.75	0.32	0.41	0.66	0.75	1.78782	1.45875	0.365	0.705	1.62328	Over 65	Male	Short-cycle tertiary	Never married	Rural	Asexual	able-bodied	Asian	Christian	lifelong Republican
283	10	10	4	11	11	5	0.58, 1.00	0.65, 1.89	0.58	1.00	0.65	1.89	4.29988	2.30614	0.79	1.27	3.30301	Over 65	Male	Graduate	Widowed	Urban	Homosexual	physically-disabled	African	Atheist	lifelong Republican
284	10	10	3	11	11	4	0.58, 1.00	0.65, 1.89	0.58	1.00	0.65	1.89	1.93802	1.3099	0.79	1.27	1.62396	55 to 64	Male	Graduate	Divorced	Rural	Bisexual	able-bodied	African	Atheist	Barack Obama Supporter
285	10	10	3	11	11	4	0.58, 1.00	0.65, 1.89	0.58	1.00	0.65	1.89	1.93802	1.3099	0.79	1.27	1.62396	Over 65	Male	Lower secondary	Widowed	Rural	Homosexual	physically-disabled	Caucasian	Jewish	Barack Obama Supporter
286	10	10	3	11	11	4	0.58, 1.00	0.65, 1.89	0.58	1.00	0.65	1.89	1.93802	1.3099	0.79	1.27	1.62396	35 to 44	Male	Lower secondary	Widowed	Urban	Bisexual	physically-disabled	Caucasian	Jewish	Barack Obama Supporter
287	10	10	3	11	11	4	0.58, 1.00	0.65, 1.89	0.58	1.00	0.65	1.89	1.93802	1.3099	0.79	1.27	1.62396	25 to 34	Male	Short-cycle tertiary	Never married	Urban	Heterosexual	able-bodied	Hispanic	Christian	Donald Trump Supporter
288	6	6	3	7	7	4	0.19, 0.31	0.65, 0.76	0.19	0.31	0.65	0.76	1.78287	1.50704	0.25	0.705	1.64496	45 to 54	Male	Bachelor	Widowed	Urban	Heterosexual	physically-disabled	Caucasian	Religious	lifelong Republican
289	10	10	3	11	11	4	0.58, 1.00	0.65, 1.89	0.58	1.00	0.65	1.89	1.93802	1.3099	0.79	1.27	1.62396	Over 65	Male	Lower secondary	Married	Urban	Heterosexual	able-bodied	Asian	Christian	Donald Trump Supporter
290	10	13	3	11	14	4	0.71, 1.00	0.48, 1.89	0.71	1.00	0.48	1.89	1.98373	1.29094	0.855	1.185	1.63733	35 to 44	Female	Graduate	Never married	Urban	Asexual	able-bodied	Asian	Jewish	Donald Trump Supporter
291	10	10	3	11	11	4	0.58, 1.00	0.65, 1.89	0.58	1.00	0.65	1.89	1.93802	1.3099	0.79	1.27	1.62396	45 to 54	Male	Bachelor	Never married	Urban	Heterosexual	able-bodied	African	Christian	Barack Obama Supporter
292	10	10	5	11	11	6	0.58, 1.00	0.65, 1.89	0.58	1.00	0.65	1.89	5.40274	4.29988	0.79	1.27	4.85131	25 to 34	Male	Below lower secondary	Never married	Urban	Bisexual	physically-disabled	Caucasian	Jewish	Barack Obama Supporter
293	10	10	3	11	11	4	0.58, 1.00	0.65, 1.89	0.58	1.00	0.65	1.89	1.93802	1.3099	0.79	1.27	1.62396	15 to 24	Female	Below lower secondary	Married	Rural	Heterosexual	physically-disabled	Hispanic	Christian	lifelong Democrat
294	10	10	3	11	11	4	0.58, 1.00	0.65, 1.89	0.58	1.00	0.65	1.89	1.93802	1.3099	0.79	1.27	1.62396	55 to 64	Female	Short-cycle tertiary	Never married	Urban	Homosexual	able-bodied	Asian	Jewish	lifelong Democrat
295	10	10	3	11	11	4	0.58, 1.00	0.65, 1.89	0.58	1.00	0.65	1.89	1.93802	1.3099	0.79	1.27	1.62396	35 to 44	Male	Graduate	Divorced	Rural	Homosexual	able-bodied	Asian	Jewish	Donald Trump Supporter
296	10	10	4	11	11	5	0.58, 1.00	0.65, 1.89	0.58	1.00	0.65	1.89	4.29988	2.30614	0.79	1.27	3.30301	25 to 34	Female	Lower secondary	Divorced	Urban	Asexual	physically-disabled	Hispanic	Jewish	lifelong Republican
297	10	11	3	11	12	4	0.63, 1.00	0.59, 1.89	0.63	1.00	0.59	1.89	1.95476	1.3025	0.815	1.24	1.62863	Over 65	Male	Graduate	Never married	Rural	Homosexual	able-bodied	Hispanic	Religious	Barack Obama Supporter
298	10	10	4	11	11	5	0.58, 1.00	0.65, 1.89	0.58	1.00	0.65	1.89	4.29988	2.30614	0.79	1.27	3.30301	Over 65	Male	Bachelor	Divorced	Rural	Bisexual	able-bodied	Asian	Christian	Barack Obama Supporter
299	10	10	3	11	11	4	0.58, 1.00	0.65, 1.89	0.58	1.00	0.65	1.89	1.93802	1.3099	0.79	1.27	1.62396	35 to 44	Male	Below lower secondary	Never married	Urban	Heterosexual	able-bodied	Asian	Christian	Donald Trump Supporter
300	10	10	3	11	11	4	0.58, 1.00	0.65, 1.89	0.58	1.00	0.65	1.89	1.93802	1.3099	0.79	1.27	1.62396	25 to 34	Female	Upper secondary	Never married	Urban	Asexual	physically-disabled	Hispanic	Christian	lifelong Democrat

## Sheet: gpt-allcountry
index	S1	S2	S3	S1-corrected	S2-corrected	S3-corrected	sigma range	alpha range	sigma lower bound	sigma upper bound	alpha lower bound	alpha upper bound	lambda upper bound	lambda lower bound	sigma	alpha	lambda	Age	Gender	Education	Marital Status	Location	country
1	6	4	1	7	5	2	0.11, 0.21	0.74, 0.84	0.11	0.21	0.74	0.84	1.54742	0.324148	0.16	0.79	0.935783	Over 65	Male	Upper secondary	Never married	Urban	US
2	6	4	3	7	5	4	0.11, 0.21	0.74, 0.84	0.11	0.21	0.74	0.84	1.78754	1.54742	0.16	0.79	1.66748	35 to 44	Female	Lower secondary	Never married	Rural	US
3	7	5	3	8	6	4	0.22, 0.30	0.77, 0.85	0.22	0.30	0.77	0.85	1.7828	1.5027	0.26	0.81	1.64275	45 to 54	Female	Bachelor	Married	Urban	US
4	7	4	3	8	5	4	0.17, 0.26	0.80, 0.89	0.17	0.26	0.80	0.89	1.78383	1.52247	0.215	0.845	1.65315	25 to 34	Female	Upper secondary	Never married	Urban	US
5	7	4	3	8	5	4	0.17, 0.26	0.80, 0.89	0.17	0.26	0.80	0.89	1.78383	1.52247	0.215	0.845	1.65315	55 to 64	Female	Graduate	Married	Urban	US
6	7	3	3	8	4	4	0.12, 0.22	0.84, 0.94	0.12	0.22	0.84	0.94	1.78667	1.54282	0.17	0.89	1.66474	55 to 64	Male	Bachelor	Married	Urban	US
7	7	4	3	8	5	4	0.17, 0.26	0.80, 0.89	0.17	0.26	0.80	0.89	1.78383	1.52247	0.215	0.845	1.65315	15 to 24	Male	Upper secondary	Married	Urban	US
8	7	3	1	8	4	2	0.12, 0.22	0.84, 0.94	0.12	0.22	0.84	0.94	1.54282	0.321157	0.17	0.89	0.931987	Over 65	Female	Graduate	Divorced	Urban	US
9	7	4	3	8	5	4	0.17, 0.26	0.80, 0.89	0.17	0.26	0.80	0.89	1.78383	1.52247	0.215	0.845	1.65315	35 to 44	Female	Bachelor	Married	Urban	US
10	6	7	3	7	8	4	0.26, 0.36	0.60, 0.70	0.26	0.36	0.60	0.70	1.78385	1.48139	0.31	0.65	1.63262	35 to 44	Male	Lower secondary	Married	Urban	US
11	7	2	3	8	3	4	0.06, 0.17	0.89, 0.99	0.06	0.17	0.89	0.99	1.79249	1.56847	0.115	0.94	1.68048	25 to 34	Female	Short-cycle tertiary	Married	Urban	US
12	7	4	1	8	5	2	0.17, 0.26	0.80, 0.89	0.17	0.26	0.80	0.89	1.52247	0.307961	0.215	0.845	0.915217	15 to 24	Male	Upper secondary	Never married	Urban	US
13	7	4	3	8	5	4	0.17, 0.26	0.80, 0.89	0.17	0.26	0.80	0.89	1.78383	1.52247	0.215	0.845	1.65315	45 to 54	Female	Upper secondary	Never married	Urban	US
14	7	3	3	8	4	4	0.12, 0.22	0.84, 0.94	0.12	0.22	0.84	0.94	1.78667	1.54282	0.17	0.89	1.66474	35 to 44	Female	Lower secondary	Married	Urban	US
15	7	4	3	8	5	4	0.17, 0.26	0.80, 0.89	0.17	0.26	0.80	0.89	1.78383	1.52247	0.215	0.845	1.65315	25 to 34	Female	Bachelor	Never married	Urban	US
16	7	5	3	8	6	4	0.22, 0.30	0.77, 0.85	0.22	0.30	0.77	0.85	1.7828	1.5027	0.26	0.81	1.64275	Over 65	Male	Upper secondary	Never married	Urban	US
[truncated: 884 more rows]

[truncated: 11 more sheets: feature-usa-gpt, feature-china-gpt, feature-uk-gpt, claude-allcountry, feature-usa-claude, feature-china-claude, feature-uk-claude, gemini-allcountry, feature-usa-gemini, feature-china-gemini, feature-uk-gemini]
