# Supplementary material
Source: ML conference proceedings conference paper supplement (https://openreview.net/forum?id=re0ly2Ylcu)
Supplement: supplementary_material [file sigma results.xlsx]

## Sheet: Sheet1
	sigma_results	switching point 2
		2	3	4	5	6	7	8	9	10	11	12	13	14
switching point 1	2	-0.42, -0.27	-0.33, -0.20	-0.25, -0.13	-0.18, -0.08	-0.13, -0.04	-0.08, 0.04	0.00, 0.11	0.07, 0.16	0.12, 0.22	0.19, 0.29	0.25, 0.35	0.32, 0.40	0.37, 0.47
	3	-0.35, -0.21	-0.26, -0.14	-0.19, -0.08	-0.13, -0.02	-0.07, 0.02	-0.03, 0.10	0.05, 0.15	0.11, 0.21	0.17, 0.27	0.23, 0.33	0.30, 0.39	0.36, 0.44	0.41, 0.51
	4	-0.28, -0.14	-0.20, -0.08	-0.13, -0.02	-0.07, 0.03	-0.02, 0.08	0.03, 0.15	0.10, 0.21	0.16, 0.25	0.21, 0.31	0.28, 0.37	0.34, 0.43	0.40, 0.48	0.45, 0.54
	5	-0.21, -0.08	-0.13, -0.01	-0.07, 0.04	-0.01, 0.09	0.04, 0.13	0.08, 0.20	0.15, 0.26	0.21, 0.30	0.26, 0.36	0.32, 0.42	0.38, 0.47	0.44, 0.52	0.48, 0.58
	6	-0.14, -0.01	-0.07, 0.05	-0.00, 0.10	0.05, 0.15	0.10, 0.19	0.14, 0.25	0.21, 0.31	0.26, 0.35	0.31, 0.41	0.37, 0.46	0.43, 0.51	0.48, 0.56	0.53, 0.62
	7	-0.07, 0.06	-0.00, 0.12	0.06, 0.16	0.11, 0.21	0.16, 0.24	0.19, 0.31	0.26, 0.36	0.31, 0.40	0.36, 0.45	0.41, 0.51	0.47, 0.56	0.52, 0.60	0.56, 0.66
	8	-0.01, 0.12	0.06, 0.17	0.12, 0.22	0.17, 0.26	0.22, 0.30	0.25, 0.36	0.32, 0.41	0.37, 0.45	0.41, 0.50	0.46, 0.55	0.51, 0.60	0.57, 0.64	0.61, 0.69
	9	0.06, 0.16	0.13, 0.22	0.18, 0.26	0.23, 0.30	0.27, 0.34	0.31, 0.39	0.36, 0.44	0.41, 0.48	0.45, 0.53	0.50, 0.58	0.55, 0.63	0.60, 0.66	0.64, 0.72
	10	0.11, 1.00	0.17, 1.00	0.22, 1.00	0.27, 1.00	0.31, 0.40	0.34, 1.00	0.40, 1.00	0.45, 1.00	0.49, 1.00	0.54, 1.00	0.59, 1.00	0.63, 1.00	0.67, 1.00
	11	0.18, 1.00	0.24, 1.00	0.29, 1.00	0.33, 1.00	0.37, 0.44	0.40, 1.00	0.46, 1.00	0.50, 1.00	0.54, 1.00	0.58, 1.00	0.63, 1.00	0.68, 1.00	0.71, 1.00
	12	0.24, 0.35	0.30, 0.40	0.34, 0.43	0.38, 0.47	0.42, 0.50	0.45, 0.55	0.50, 0.59	0.54, 0.62	0.58, 0.66	0.62, 0.70	0.67, 0.75	0.71, 0.78	0.75, 0.82
	13	0.31, 0.42	0.36, 0.46	0.40, 0.49	0.44, 0.53	0.48, 0.55	0.50, 0.60	0.55, 0.64	0.59, 0.67	0.63, 0.71	0.67, 0.75	0.71, 0.79	0.75, 0.82	0.78, 0.86
	14	0.37, 0.47	0.42, 0.51	0.46, 0.54	0.50, 0.57	0.53, 0.60	0.56, 0.64	0.61, 0.68	0.64, 0.71	0.67, 0.75	0.71, 0.78	0.75, 0.82	0.79, 0.85	0.82, 0.89
